# Supplementary material for: Cascade Transformation of the Ansamycin Benzoquinone Core into Benzoxazole Influencing Anticancer Activity and Selectivity
Source: PubMed Central journal article supplement (PMC10337034; doi:10.1021/acs.joc.3c00493), 2023-06-05
Supplement: jo3c00493_si_001.pdf [file jo3c00493_si_001.pdf]

## Supporting Info

### **Cascade transformation of the ansamycin benzoquinone core into benzoxazole influencing anticancer activity and selectivity**

Natalia Skrzypczak<sup>a</sup>, Krystian Pyta<sup>a, d</sup>, Wiktor Bohusz<sup>a</sup>, Aleksandra Leśniewska<sup>a</sup>,  
Maria Gdaniec<sup>a</sup>, Piotr Ruszkowski<sup>c</sup>, Wojciech Schilf<sup>b</sup>, Franz Bartl<sup>d</sup> and Piotr Przybylski<sup>a\*</sup>

<sup>a</sup> Faculty of Chemistry, Adam Mickiewicz University, Uniwersytetu Poznańskiego 8, 61-614 Poznań, Poland  
[piotrp@amu.edu.pl]

<sup>b</sup> Institute of Organic Chemistry, Polish Academy of Sciences, Kasprzaka 44/52, 01-224 Warsaw, Poland

<sup>c</sup> Department of Pharmacology, Poznań University of Medical Sciences, Rokietnicka 5a, 60-806 Poznań,  
Poland

<sup>d</sup> Lebenswissenschaftliche Fakultät, Institut für Biologie, Biophysikalische Chemie Humboldt-Universität zu  
Berlin Invalidenstraße 42, Berlin, Germany

\*corresponding author e-mail: [piotrp@amu.edu.pl](mailto:piotrp@amu.edu.pl)

|                                                                                                                                                                                                                                                                                                                                                                                                                                                                                       |        |
|---------------------------------------------------------------------------------------------------------------------------------------------------------------------------------------------------------------------------------------------------------------------------------------------------------------------------------------------------------------------------------------------------------------------------------------------------------------------------------------|--------|
| Supporting Info.....                                                                                                                                                                                                                                                                                                                                                                                                                                                                  | SI-1   |
| <b>HPLC measurements:</b> .....                                                                                                                                                                                                                                                                                                                                                                                                                                                       | SI-6   |
| <b>FT-IR measurements:</b> .....                                                                                                                                                                                                                                                                                                                                                                                                                                                      | SI-6   |
| <b>NMR measurements:</b> .....                                                                                                                                                                                                                                                                                                                                                                                                                                                        | SI-6   |
| <b>ESI MS analyses:</b> .....                                                                                                                                                                                                                                                                                                                                                                                                                                                         | SI-7   |
| <b>Elemental analyses:</b> .....                                                                                                                                                                                                                                                                                                                                                                                                                                                      | SI-7   |
| <b>X-ray crystal structure analyses:</b> .....                                                                                                                                                                                                                                                                                                                                                                                                                                        | SI-7   |
| <b>Biological assays</b> .....                                                                                                                                                                                                                                                                                                                                                                                                                                                        | SI-8   |
| <b>General synthetic procedures:</b> .....                                                                                                                                                                                                                                                                                                                                                                                                                                            | SI-9   |
| <b>Cyclization reaction tests:</b> .....                                                                                                                                                                                                                                                                                                                                                                                                                                              | SI-10  |
| Spectral characteristic of a <b>GDM</b> analogs <b>1-12</b> : .....                                                                                                                                                                                                                                                                                                                                                                                                                   | SI-10  |
| Spectral characteristic of a <b>GDM</b> analogs <b>1a-16a</b> : .....                                                                                                                                                                                                                                                                                                                                                                                                                 | SI-15  |
| <b>Table S1</b> Cyclization reaction tests, presented for the amine derivative of <b>GDM</b> , which in position C(17) contains an aminobenzyl substituent, leading to the formation of an oxazole ring using various organic and inorganic bases as catalysts, and carried out in various solvents.....                                                                                                                                                                              | SI-22  |
| <b>Table S2</b> Cyclization reaction tests, presented for the amine derivatives ( <b>1-12</b> ) of <b>GDM</b> , leading to the formation of an oxazole ring using TMG as catalysts, and carried out in DMF (0°C). .....                                                                                                                                                                                                                                                               | SI-24  |
| <b>Table S3</b> Crystal data and refinement details .....                                                                                                                                                                                                                                                                                                                                                                                                                             | SI-25  |
| <b>Table S4</b> Comparison of biological activity between <b>GDM</b> , benzoxazole ( <b>1a-12a</b> ) and C(17)-amine derivatives ( <b>1-12</b> ) in cancer cell lines (SKBR-3, SKOV-3, PC-3) and in healthy cell line (HDF); the activity expressed as IC <sub>50</sub> [μM]; selectivity indices (SI) are given in square brackets.....                                                                                                                                              | SI-27  |
| <b>Figure S18</b> Progress of the substrate conversion [%] per unit of time [min] for derivatives <b>1a-11a</b> . The colors and shapes were assigned appropriately to the derivatives: <b>1a</b> -black square, <b>2a</b> -pink square, <b>3a</b> -red triangle, <b>4a</b> -blue triangle, <b>6a</b> -green triangle, <b>7a</b> -purple triangle, <b>8a</b> -orange dot, <b>9a</b> -blue dot, <b>10a</b> -green diamond, <b>11a</b> -purple diamond, <b>12a</b> -orange diamond..... | SI-38  |
| <b>References:</b> .....                                                                                                                                                                                                                                                                                                                                                                                                                                                              | SI-104 |
| <br>                                                                                                                                                                                                                                                                                                                                                                                                                                                                                  |        |
| <b>Figure S1</b> Overlay of the geldanamycin (CCDC 1988068) <sup>7</sup> (red) and <b>2a</b> (blue) molecules (rms = 0.233 Å) in conformations found in their crystal structures. Intramolecular O-H···O hydrogen bond in <b>2a</b> is shown with a dashed line. Only N-H and O-H hydrogen atoms are shown. ....                                                                                                                                                                      | SI-29  |
| <b>Figure S2</b> The asymmetric unit of <b>1a</b> . Displacement ellipsoids are shown at the 50% probability level. ....                                                                                                                                                                                                                                                                                                                                                              | SI-30  |
| <b>Figure S3</b> The asymmetric unit of <b>2a</b> . Displacement ellipsoids are shown at the 50% probability level. ....                                                                                                                                                                                                                                                                                                                                                              | SI-30  |
| <b>Figure S4</b> The asymmetric unit of <b>3a</b> . Displacement ellipsoids are shown at the 50% probability level. The isopropanol molecule and the substituent at C(29) are disordered. ....                                                                                                                                                                                                                                                                                        | 31     |
| <b>Figure S5</b> The asymmetric unit of <b>4a</b> . Displacement ellipsoids are shown at the 50% probability level. The isopropanol molecule and the substituent at C(29) are disordered. ....                                                                                                                                                                                                                                                                                        | SI-31  |
| <b>Figure S6</b> The asymmetric unit of <b>5a</b> . Displacement ellipsoids are shown at the 50% probability level. The isopropanol molecule and the substituent at C(29) are disordered. ....                                                                                                                                                                                                                                                                                        | SI-32  |

|                                                                                                                                                                                                                                                                                                                                                                                                                                                                                       |       |
|---------------------------------------------------------------------------------------------------------------------------------------------------------------------------------------------------------------------------------------------------------------------------------------------------------------------------------------------------------------------------------------------------------------------------------------------------------------------------------------|-------|
| <b>Figure S7</b> The asymmetric unit of <b>6a</b> . Displacement ellipsoids for the ordered part of the molecule are shown at the 50% probability level. The substituent at C(29) shown as a ‘ball and stick’ model is disordered over three sites. The isopropanol is shown with dashed bonds. ....                                                                                                                                                                                  | SI-32 |
| <b>Figure S8</b> The asymmetric unit of <b>7a</b> . Displacement ellipsoids are shown at the 50% probability level. The substituent at C(29) is disordered over three sites and only one site with the major occupancy factor is shown in the diagram.....                                                                                                                                                                                                                            | SI-33 |
| <b>Figure S9</b> The asymmetric unit of <b>8a</b> . Displacement ellipsoids are shown at the 50% probability level. ....                                                                                                                                                                                                                                                                                                                                                              | SI-33 |
| <b>Figure S10</b> The asymmetric unit of <b>9a</b> . Displacement ellipsoids are shown at the 50% probability level. The substituent at C(29) is disordered over two sites. The isopropanol molecule has a partial occupancy.....                                                                                                                                                                                                                                                     | SI-34 |
| <b>Figure S11</b> The asymmetric unit in <b>10a</b> . Displacement ellipsoids are shown at the 50% probability level. The isopropanol molecule and the substituent at C(29) are disordered. ....                                                                                                                                                                                                                                                                                      | SI-34 |
| <b>Figure S12</b> The asymmetric unit of <b>11a</b> . Displacement ellipsoids are shown at the 50% probability level. The substituent at C(29) is disordered over three sites and only one site with the major occupancy factor is shown in the diagram. The isopropanol solvent molecule has a partial occupancy. ....                                                                                                                                                               | SI-35 |
| <b>Figure S13</b> View of the 2D assembly <i>via</i> hydrogen bonds in <b>2a</b> . This structural motif is observed in all studied crystal structures. ....                                                                                                                                                                                                                                                                                                                          | SI-35 |
| <b>Figure S14</b> Crystal packing of <b>2a</b> shown in the projection along the b axis. Hydrogen bonded isopropanol molecules form a chain extended along the b axis.....                                                                                                                                                                                                                                                                                                            | SI-36 |
| <b>Figure S15</b> Crystal packing of <b>7a</b> shown in the projection along the b axis. ....                                                                                                                                                                                                                                                                                                                                                                                         | SI-36 |
| <b>Figure S16</b> Crystal packing of <b>8a</b> shown in the projection along the b axis. The isopropanol solvent molecule in the site with the major occupation is not hydrogen-bonded to the host molecules....                                                                                                                                                                                                                                                                      | SI-37 |
| <b>Figure S17</b> Crystal packing of <b>10a</b> shown in the projection along the b axis. Isopropanol molecules are hydrogen boded to the host molecules. ....                                                                                                                                                                                                                                                                                                                        | SI-37 |
| <b>Figure S18</b> Progress of the substrate conversion [%] per unit of time [min] for derivatives <b>1a-11a</b> . The colors and shapes were assigned appropriately to the derivatives: <b>1a</b> -black square, <b>2a</b> -pink square, <b>3a</b> -red triangle, <b>4a</b> -blue triangle, <b>6a</b> -green triangle, <b>7a</b> -purple triangle, <b>8a</b> -orange dot, <b>9a</b> -blue dot, <b>10a</b> -green diamond, <b>11a</b> -purple diamond, <b>12a</b> -orange diamond..... | SI-38 |
| <b>Figure S19</b> HPLC chromatogram recorded for the reaction mixture during conversion <b>2</b> to <b>2a</b> , captured with intermediates ( <b>2'</b> and <b>2''</b> ). UV-vis and MS spectrum for the product of the first intermediate <b>2'</b> .....                                                                                                                                                                                                                            | SI-39 |
| <b>Figure S20</b> HPLC chromatogram recorded for the reaction mixture during conversion <b>2</b> to <b>2a</b> , captured with intermediates ( <b>2'</b> and <b>2''</b> ). UV-vis and MS spectrum for the product <b>2a</b> .....                                                                                                                                                                                                                                                      | SI-40 |
| <b>Figure S21</b> HPLC chromatogram recorded for the reaction mixture during conversion <b>2</b> to <b>2a</b> , captured with intermediates ( <b>2'</b> and <b>2''</b> ). UV-vis and MS spectrum for substrate <b>2</b> . ....                                                                                                                                                                                                                                                        | SI-41 |
| <b>Figure S22</b> HPLC chromatogram recorded for the reaction mixture during conversion <b>2</b> to <b>2a</b> , captured with intermediates ( <b>2'</b> and <b>2''</b> ). UV-vis and MS spectrum for the product of the second intermediate <b>2''</b> . ....                                                                                                                                                                                                                         | SI-42 |
| <b>Figure S23</b> <sup>1</sup> H and <sup>13</sup> C{ <sup>1</sup> H} spectra of compound <b>1</b> in CDCl <sub>3</sub> . ....                                                                                                                                                                                                                                                                                                                                                        | SI-43 |
| <b>Figure S24</b> FT-IR spectrum of compound <b>1</b> (in KBr). ....                                                                                                                                                                                                                                                                                                                                                                                                                  | SI-44 |
| <b>Figure S25</b> <sup>1</sup> H and <sup>13</sup> C{ <sup>1</sup> H} spectra of compound <b>2</b> in CDCl <sub>3</sub> . ....                                                                                                                                                                                                                                                                                                                                                        | SI-45 |
| <b>Figure S26</b> FT-IR spectrum of compound <b>2</b> (in KBr). ....                                                                                                                                                                                                                                                                                                                                                                                                                  | SI-46 |
| <b>Figure S27</b> <sup>1</sup> H and <sup>13</sup> C{ <sup>1</sup> H} spectra of compound <b>3</b> in CDCl <sub>3</sub> . ....                                                                                                                                                                                                                                                                                                                                                        | SI-47 |
| <b>Figure S28</b> FT-IR spectrum of compound <b>3</b> (in KBr). ....                                                                                                                                                                                                                                                                                                                                                                                                                  | SI-48 |
| <b>Figure S29</b> <sup>1</sup> H and <sup>13</sup> C{ <sup>1</sup> H} spectra of compound <b>4</b> in CDCl <sub>3</sub> . ....                                                                                                                                                                                                                                                                                                                                                        | SI-49 |
| <b>Figure S30</b> FT-IR spectrum of compound <b>4</b> (in KBr). ....                                                                                                                                                                                                                                                                                                                                                                                                                  | SI-50 |

|                                                                                                                                         |       |
|-----------------------------------------------------------------------------------------------------------------------------------------|-------|
| <b>Figure S31</b> $^1\text{H}$ and $^{13}\text{C}\{^1\text{H}\}$ spectra of compound <b>5</b> in $\text{CDCl}_3$ .                      | SI-51 |
| <b>Figure S32</b> FT-IR spectrum of compound <b>5</b> (in KBr).                                                                         | SI-52 |
| <b>Figure S33</b> $^1\text{H}$ and $^{13}\text{C}\{^1\text{H}\}$ spectra of compound <b>6</b> in $\text{CDCl}_3$ .                      | SI-53 |
| <b>Figure S34</b> FT-IR spectrum of compound <b>6</b> (in KBr).                                                                         | SI-54 |
| <b>Figure S35</b> $^1\text{H}$ and $^{13}\text{C}\{^1\text{H}\}$ spectra of compound <b>7</b> in $\text{CDCl}_3$ .                      | SI-55 |
| <b>Figure S36</b> FT-IR spectrum of compound <b>7</b> (in KBr).                                                                         | SI-56 |
| <b>Figure S37</b> $^1\text{H}$ and $^{13}\text{C}\{^1\text{H}\}$ spectra of compound <b>8</b> in $\text{CDCl}_3$ .                      | SI-57 |
| <b>Figure S38</b> FT-IR spectrum of compound <b>8</b> (in KBr).                                                                         | SI-58 |
| <b>Figure S39</b> $^1\text{H}$ and $^{13}\text{C}\{^1\text{H}\}$ spectra of compound <b>9</b> in $\text{CDCl}_3$ .                      | SI-59 |
| <b>Figure S40</b> FT-IR spectrum of compound <b>9</b> (in KBr).                                                                         | SI-60 |
| <b>Figure S41</b> $^1\text{H}$ and $^{13}\text{C}\{^1\text{H}\}$ spectra of compound <b>10</b> in $\text{CDCl}_3$ .                     | SI-61 |
| <b>Figure S42</b> FT-IR spectrum of compound <b>10</b> (in KBr).                                                                        | SI-62 |
| <b>Figure S43</b> $^1\text{H}$ and $^{13}\text{C}\{^1\text{H}\}$ spectra of compound <b>11</b> in $\text{CDCl}_3$ .                     | SI-63 |
| <b>Figure S44</b> FT-IR spectrum of compound <b>11</b> (in KBr).                                                                        | SI-64 |
| <b>Figure S45</b> $^1\text{H}$ and $^{13}\text{C}\{^1\text{H}\}$ spectra of compound <b>12</b> in $\text{CDCl}_3$ .                     | SI-65 |
| <b>Figure S46</b> FT-IR spectrum of compound <b>12</b> (in KBr).                                                                        | SI-66 |
| <b>Figure S47</b> $^1\text{H}$ and $^{13}\text{C}\{^1\text{H}\}$ spectra of compound <b>1a</b> in $\text{DMSO-}d_6 + \text{ACN-}d_3$ .  | SI-67 |
| <b>Figure S48</b> FT-IR spectrum of compound <b>1a</b> (in KBr).                                                                        | SI-68 |
| <b>Figure S49</b> $^1\text{H}$ and $^{13}\text{C}\{^1\text{H}\}$ spectra of compound <b>2a</b> in $\text{DMSO-}d_6 + \text{ACN-}d_3$ .  | SI-69 |
| <b>Figure S50</b> FT-IR spectrum of compound <b>2a</b> (in KBr).                                                                        | SI-70 |
| <b>Figure S51</b> $^1\text{H}$ and $^{13}\text{C}\{^1\text{H}\}$ spectra of compound <b>3a</b> in $\text{DMSO-}d_6 + \text{ACN-}d_3$ .  | SI-71 |
| <b>Figure S52</b> FT-IR spectrum of compound <b>3a</b> (in KBr).                                                                        | SI-72 |
| <b>Figure S53</b> $^1\text{H}$ and $^{13}\text{C}\{^1\text{H}\}$ spectra of compound <b>4a</b> in $\text{DMSO-}d_6 + \text{ACN-}d_3$ .  | SI-73 |
| <b>Figure S54</b> FT-IR spectrum of compound <b>4a</b> (in KBr).                                                                        | SI-74 |
| <b>Figure S55</b> $^1\text{H}$ and $^{13}\text{C}\{^1\text{H}\}$ spectra of compound <b>5a</b> in $\text{DMSO-}d_6 + \text{ACN-}d_3$ .  | SI-75 |
| <b>Figure S56</b> FT-IR spectrum of compound <b>5a</b> (in KBr).                                                                        | SI-76 |
| <b>Figure S57</b> $^1\text{H}$ and $^{13}\text{C}\{^1\text{H}\}$ spectra of compound <b>6a</b> in $\text{DMSO-}d_6 + \text{ACN-}d_3$ .  | SI-77 |
| <b>Figure S58</b> FT-IR spectrum of compound <b>6a</b> (in KBr).                                                                        | SI-78 |
| <b>Figure S59</b> $^1\text{H}$ and $^{13}\text{C}\{^1\text{H}\}$ spectra of compound <b>7a</b> in $\text{DMSO-}d_6 + \text{ACN-}d_3$ .  | SI-79 |
| <b>Figure S60</b> FT-IR spectrum of compound <b>7a</b> (in KBr).                                                                        | SI-80 |
| <b>Figure S61</b> $^1\text{H}$ and $^{13}\text{C}\{^1\text{H}\}$ spectra of compound <b>8a</b> in $\text{DMSO-}d_6 + \text{ACN-}d_3$ .  | SI-81 |
| <b>Figure S62</b> FT-IR spectrum of compound <b>8a</b> (in KBr).                                                                        | SI-82 |
| <b>Figure S63</b> $^1\text{H}$ and $^{13}\text{C}\{^1\text{H}\}$ spectra of compound <b>9a</b> in $\text{DMSO-}d_6 + \text{ACN-}d_3$ .  | SI-83 |
| <b>Figure S64</b> FT-IR spectrum of compound <b>9a</b> (in KBr).                                                                        | SI-84 |
| <b>Figure S65</b> $^1\text{H}$ and $^{13}\text{C}\{^1\text{H}\}$ spectra of compound <b>10a</b> in $\text{DMSO-}d_6 + \text{ACN-}d_3$ . | SI-85 |
| <b>Figure S66</b> FT-IR spectrum of compound <b>10a</b> (in KBr).                                                                       | SI-86 |
| <b>Figure S67</b> $^1\text{H}$ and $^{13}\text{C}\{^1\text{H}\}$ spectra of compound <b>11a</b> in $\text{DMSO-}d_6 + \text{ACN-}d_3$ . | SI-87 |
| <b>Figure S68</b> FT-IR spectrum of compound <b>11a</b> (in KBr).                                                                       | SI-88 |
| <b>Figure S69</b> $^1\text{H}$ and $^{13}\text{C}\{^1\text{H}\}$ spectra of compound <b>12a</b> in $\text{DMSO-}d_6 + \text{ACN-}d_3$ . | SI-89 |
| <b>Figure S70</b> $^1\text{H-}^1\text{H}$ COSY spectrum of compound <b>12a</b> in $\text{DMSO-}d_6 + \text{ACN-}d_3$ .                  | SI-90 |
| <b>Figure S71</b> $^1\text{H-}^{13}\text{C}$ HSQC spectrum of compound <b>12a</b> in $\text{DMSO-}d_6 + \text{ACN-}d_3$ .               | SI-90 |
| <b>Figure S72</b> $^1\text{H-}^{13}\text{C}$ HMBC spectra of compound <b>12a</b> in $\text{DMSO-}d_6 + \text{ACN-}d_3$ .                | SI-91 |
| <b>Figure S73</b> FT-IR spectrum of compound <b>12a</b> (in KBr).                                                                       | SI-92 |
| <b>Figure S74</b> $^1\text{H}$ and $^{13}\text{C}\{^1\text{H}\}$ spectra of compound <b>13a</b> in $\text{DMSO-}d_6 + \text{ACN-}d_3$ . | SI-93 |
| <b>Figure S75</b> $^1\text{H-}^1\text{H}$ COSY spectra of compound <b>13a</b> in $\text{DMSO-}d_6 + \text{ACN-}d_3$ .                   | SI-94 |
| <b>Figure S76</b> $^1\text{H-}^{13}\text{C}$ HSQC spectra of compound <b>13a</b> in $\text{DMSO-}d_6 + \text{ACN-}d_3$ .                | SI-95 |
| <b>Figure S77</b> $^1\text{H-}^{13}\text{C}$ HMBC spectra of compound <b>13a</b> in $\text{DMSO-}d_6 + \text{ACN-}d_3$ .                | SI-96 |
| <b>Figure S78</b> FT-IR spectrum of compound <b>13a</b> (in KBr).                                                                       | SI-97 |



|                                                                                                                                             |        |
|---------------------------------------------------------------------------------------------------------------------------------------------|--------|
| <b>Figure S79</b> ESI-MS spectrum of compound <b>13a</b> .....                                                                              | SI-97  |
| <b>Figure S80</b> $^1\text{H}$ and $^{13}\text{C}\{^1\text{H}\}$ spectra of compound <b>14a</b> in $\text{DMSO-}d_6 + \text{ACN-}d_3$ ..... | SI-98  |
| <b>Figure S81</b> FT-IR spectrum of compound <b>14a</b> (in KBr).....                                                                       | SI-99  |
| <b>Figure S82</b> ESI-MS spectrum of compound <b>14a</b> .....                                                                              | SI-99  |
| <b>Figure S83</b> $^1\text{H}$ and $^{13}\text{C}\{^1\text{H}\}$ spectra of compound <b>15a</b> in $\text{DMSO-}d_6 + \text{ACN-}d_3$ ..... | SI-100 |
| <b>Figure S84</b> FT-IR spectrum of compound <b>15a</b> (in KBr).....                                                                       | SI-101 |
| <b>Figure S85</b> ESI-MS spectrum of compound <b>15a</b> .....                                                                              | SI-101 |
| <b>Figure S86</b> $^1\text{H}$ and $^{13}\text{C}\{^1\text{H}\}$ spectra of compound <b>16a</b> in $\text{DMSO-}d_6 + \text{ACN-}d_3$ ..... | SI-102 |
| <b>Figure S87</b> FT-IR spectrum of compound <b>16a</b> (in KBr).....                                                                       | SI-103 |
| <b>Figure S88</b> ESI-MS spectrum of compound <b>16a</b> .....                                                                              | SI-103 |

### General Experimental:

Geldanamycin was purchased from Carbosynth, batch number AG236511801. Solvents CD<sub>3</sub>CN, DMSO-d<sub>6</sub>, CDCl<sub>3</sub> for NMR spectroscopic measurements as well as, methanol, acetone, Dimethyl sulfoxide (DMSO), N,N-Dimethylformamide (DMF), Acetonitrile (ACN), Triethylamine (TEA), Tetrahydrofuran (THF), NaH K<sub>2</sub>CO<sub>3</sub>, quinuclidine, 4-(Dimethylamino)pyridine (DMAP), 1,1,3,3-Tetramethylguanidine (TMG), 1,8-Diazabicyclo[5.4.0]undec-7-ene (DBU), 1,8-Bis(tetramethylguanidino)naphthalene (TMGN), 1,5,7-Triazabicyclo[4.4.0]dec-5-ene (TBD), Imino-tris(dimethylamino)phosphorane (Phosphazene base P<sub>1</sub>-H), benzylamine, 4-Fluorobenzylamine, 4-Chlorobenzylamine, 4-Bromobenzylamine, 4-Iodobenzylamine, 4-Methylbenzylamine, 4-Methoxybenzylamine, 4-(Trifluoromethyl)benzylamine, 4-(Trifluoromethoxy)benzylamine, 4-Cyanobenzylamine, 4-(Dimethylamino)benzylamine, 4-Nitrobenzylamine, butylamine, allylamine, propargylamine and pyridin-4-ylmethanamine for the syntheses of **GDM** derivatives were purchased from Sigma-Aldrich. While methanol, methylene chloride and acetone used for column chromatography were purchased from Chemsolve. H<sub>2</sub>O HPLC gradient grade and CH<sub>3</sub>CN HPLC gradient grade were purchased from J. T. Baker.

### HPLC measurements:

The purity of the **GDM** analogs **1-12**, **1a-12a** was determined by HPLC method using Dionex Ultimate 3000 equipped with an LPG-3400 SD gradient pump using Thermo GOLD C18 150×4.6 mm (5 μm) and Accucore XL column, TCC-3000SD thermostat to columns (column temp. equal 25 °C) and Dionex VWD- 3400RS variable wavelength UV-vis detector (detection at λ<sub>max</sub>=220, 260 and 341 nm); the flow rates were 0.5 mL/min (for **1-12**) and 0.75 mL/min (for **1a-12a**) with injection volumes of 10 μL in acetonitrile mixtures and the mobile phase: 35:65 H<sub>2</sub>O/CH<sub>3</sub>CN.

The reaction progress of the **GDM** analogs **13a-16a** was determined by HPLC method using Dionex Ultimate 3000 equipped with an LPG-3400 SD gradient pump using X-bridge C8 150×3.0 mm (3.5 μm) column, TCC-3000SD thermostat to columns (column temp. equal 25 °C) and Dionex VWD- 3400RS variable wavelength UV-vis detector (detection at λ<sub>max</sub>=220, 260 and 341 nm); the flow rates were 0.75 mL/min with injection volumes of 5 μL in acetonitrile/methanol mixtures and the mobile phase: 55:45 H<sub>2</sub>O/CH<sub>3</sub>CN.

### FT-IR measurements:

The FT-IR spectra of **GDM** analogs **1-12** and **1a-12a** were recorded in the KBr pellet. FT-IR measurements were performed at a spectrometer equipped with a DTGS detector and two-columnar purge gas generator at resolution 1 cm<sup>-1</sup>, NSS = 150, range 4000-400 cm<sup>-1</sup>. The Happ-Genzel apodization function was used.

### NMR measurements:

The <sup>1</sup>H and <sup>13</sup>C measurements of derivatives of **GDM** (**1-12**) were performed in CDCl<sub>3</sub> using a 600 MHz and 500 MHz Bruker BioSpin GmbH spectrometer. The operating frequencies for <sup>1</sup>H measurements were 600.25 MHz; example parameters: spectral width, sw = 6.3636; acquisition time at = 2.8443 s; relaxation delay d<sub>1</sub> = 1.0 s; T = 298.0 K; TMS was used as the internal standard. No window function or zero filling were used. The digital resolution was

0.2 Hz/point.  $^{13}\text{C}$  NMR spectra were recorded at the operating frequency 150.95 MHz;  $\text{sw} = 40650.4$  Hz,  $d_1 = 1.0$  s,  $T = 298.0$  K, and TMS as the internal standard. Line broadening parameters of 0.5 or 1 Hz were applied.  $^1\text{H}$  and  $^{13}\text{C}$  NMR resonances unambiguously assigned based on the  $^1\text{H}-^{13}\text{C}$  HMBC,  $^1\text{H}-^{13}\text{C}$  HSQC, and  $^1\text{H}-^1\text{H}$  COSY couplings. The  $^1\text{H}$  and  $^{13}\text{C}$  measurements of derivatives of **GDM (1a-12a)** were performed in  $\text{ACN-d}_3+\text{DMSO-d}_6$  using a 500 MHz Varian-Agilent spectrometer. The operating frequencies for  $^1\text{H}$  measurements were 499.83 MHz; example parameters: spectral width,  $\text{sw} = 8012.8$ ; acquisition time at  $= 4.000$  s; relaxation delay  $d_1 = 1.0$  s;  $T = 243.15$  K; TMS was used as the internal standard. No window function or zero filling were used. The digital resolution was 0.2 Hz/point.  $^{13}\text{C}$  NMR spectra were recorded at the operating frequency 125.7 MHz;  $\text{sw} = 37878.8$  Hz,  $d_1 = 1.0$  s,  $T = 243.15$  K, and TMS as the internal standard. Line broadening parameters of 0.5 or 1 Hz were applied.  $^1\text{H}$  and  $^{13}\text{C}$  NMR resonances unambiguously assigned based on the  $^1\text{H}-^{13}\text{C}$  HMBC,  $^1\text{H}-^{13}\text{C}$  HSQC, and  $^1\text{H}-^1\text{H}$  COSY couplings.

#### ESI MS analyses:

The mass spectra were recorded on ZQ Waters spectrometer using Electrospray ionization method. (range of  $m/z$  range from 100 to 2000).

#### Elemental analyses:

The elemental analyses of new **GDM** analogs (**1-12** and **1a-12a**) were carried out on Vario ELIII (Germany).

#### X-ray crystal structure analyses:

Compounds **1a-11a** were poorly soluble in most organic solvents. Single crystals suitable for X-ray analysis were obtained by slow cooling of their isopropanol solutions. All diffraction experiments were carried out at 130 K with an Oxford Diffraction SuperNova diffractometer using mirror-monochromated  $\text{Cu K}\alpha$  radiation. Diffraction data were processed with the CrysAlis PRO software.<sup>1</sup> Most of the crystals showed extended shape of reflections resulting in poor resolution of the diffraction data. The structures were solved with SHELXT<sup>2</sup> and refined by full-matrix least-squares on  $F^2$  with SHELXL-2018<sup>3</sup> within Olex2.<sup>4</sup> The assumed absolute structure of the studied compounds conforms with the known absolute configuration of geldanamycin. The crystal structures of compounds **1a-11a** form two isostructural series, both belonging to the  $P2_1$  space group. The first group consists of **1a** and **2a** that crystallize as solvates with two isopropanol molecules in the asymmetric unit. All crystal components of these crystals are ordered. The structures were refined with anisotropic displacement parameters for non-hydrogen atoms. Hydrogen atoms were placed in idealized positions, except some hydroxyl H atoms which were located in electron density difference maps and had their coordinates refined. In the second group the asymmetric unit cell consists of one molecule of the ansamycin derivative **3a-11a** and a varied amount of isopropanol molecules. Apart from **8a** (cyano derivative), in all other cases disorder of the benzoxazole and its aromatic substituent was observed. This substituent was located in two or three different sites as a result of small rotation around the two bonds connecting the *ansa* chain and the benzoxazole fragment. The benzoxazole aromatic substituent and solvent isopropanol molecules are packed together in a wide channel running along the *b* axis. In the case of trifluoromethoxy derivative **7a**, with the largest substituent in the para-position of the benzene ring, no solvent molecules were identified. In the structures of **3a**, **4a**, **8a**, **10a** with relatively small groups in the para-position of the benzene ring ( $\text{CH}_3$ , Cl, Br CN) there is one molecule of isopropanol in the asymmetric unit. In case of larger substituents in the para-position, the amount of isopropanol in the asymmetric unit changes from 0.85 for **11a** ( $\text{OCH}_3$ ),

through 0.70 for **9a** (NO<sub>2</sub>) to 0.46 for **6a** (CF<sub>3</sub>). The solvent molecules are also disordered over two or three sites. In the refinement process numerous restraints and constraints were imposed on the geometry, displacement parameters and occupancy factors of the disordered fragments.

Crystal data and the refinement details are collected in Table 1S. The asymmetric units in the crystal structures of **1a-11a** are shown in Figs. 1S-12S. In all cases the crystal structures are constructed from hydrogen-bonded 2D assemblies shown in Fig. 13S and Figs. 14S-17S. These assemblies closely resemble robust hydrogen-bonded layers found in the geldanamycin structure and in the crystal structures of its C(17) amino derivatives. This fact explains why in the solid state conformationally flexible geldanamycin and its derivatives exhibit little conformational diversity.

Overlay of geldanamycin and **1a** molecules in the conformation adopted in the solid state is shown in Fig. 1S.

CCDC 2155685-2155694 contain the supplementary crystallographic data for this paper. These data can be obtained free of charge via <http://www.ccdc.cam.ac.uk/conts/retrieving.html> (or from the CCDC, 12 Union Road, Cambridge CB2 1EZ, UK; Fax: +44 1223 336033; E-mail: [deposit@ccdc.cam.ac.uk](mailto:deposit@ccdc.cam.ac.uk)

#### **Biological assays**

Human cancer cells SKBR-3 (human breast cancer cell line) and SKOV-3 (ovarian cancer cell line) were cultured in McCoy's Modified Medium. Human cancer cells PC-3 (human prostate cancer cell line) were cultured in an F-12K medium. Human Dermal Fibroblasts cell line (HDF) was cultured in Fibroblast Basal Medium. Each medium was supplemented with 10% fetal bovine serum, 1% L-glutamine, and 1% penicillin/streptomycin solution. The cell lines were kept in the incubator at 37°C. The optimal plating density of cell lines was determined to be  $5 \times 10^4$ . All the cell lines and mediums were obtained from the American Type Culture Collection (ATCC) supplied by LGC-Standards. The protein-staining SRB (Sigma-Aldrich) microculture colourimetric assay, developed by the National Cancer Institute (USA) for in vitro antitumor screening was used in this study, to estimate the cell number by providing a sensitive index of total cellular protein content, being linear to cell density. The monolayer cell culture was trypsinized and the cell count was adjusted to  $5 \times 10^4$  cells. To each well of the 96 well microtiter plate, 0.1 mL of the diluted cell suspension (approximately 10,000 cells) was added. After 24 hours, when a partial monolayer was formed, the supernatant was washed out and 100  $\mu$ L of six different compound concentrations (0.1, 0.2, 1, 2, 10, and 20  $\mu$ M) were added to the cells in microtitre plates. The tested **GDM**, **1-11** and **1a-11a** were dissolved in DMSO (containing 10% of water) (100  $\mu$ L) and the content of DMSO did not exceed 0.1%; this concentration was found to be nontoxic to the cell lines. The cells were exposed to compounds for 72 hours at 37 °C in a humidified atmosphere (90% RH) containing 5% CO<sub>2</sub>. After that, 25  $\mu$ L of 50% trichloroacetic acid was added to the wells and the plates were incubated for 1 hour at 4°C. The plates were then washed out with distilled water to remove traces of medium and next dried by the air. The air-dried plates were stained with 100  $\mu$ L of 0.4% sulforhodamine B (prepared in 1% acetic acid) and kept for 30 minutes at room temperature. The unbound dye was removed by rapidly washing with 1% acetic acid and then air dried overnight. The protein-bound dye was dissolved in 100  $\mu$ L of 10 mM unbuffered Tris base (pH 10.5) for optical density determination at 490 nm. All cytotoxicity experiments were performed three times. Cell survival was Found as the percentage

absorbance compared to the control (nontreated cells). **GDM** was used as the internal standards. Additionally, biological assays were performed in the Human Dermal Fibroblasts cell line (HDF) with the aim to evaluate the cytotoxicity of **GDM** and its **1-11** and **1a-11a** analogues in healthy cells. Results of anticancer studies of novel analogues of **GDM** are shown in Table 2. SI indexes were from equation  $SI = IC_{50 \text{ normal cell line HDF}}/IC_{50 \text{ respective cancerous cell line}}$  (Table 2). A beneficial  $SI > 1.0$  indicates a compound with efficacy against cancer cells greater than the toxicity against normal cells.

#### General synthetic procedures:

The general synthetic procedure of derivatives of **GDM 1-12** together with the analytical data (FT-IR, HRMS, HPLC and elemental data): First, 200 mg (0.36 mmol) of **GDM** was dissolved in a 4.4 mL mixture of THF/MeOH (10:1) and then a four-fold excess of amine was added (1.44 mmol): benzylamine (**1**), 4-Fluorobenzylamine (**2**), 4-Chlorobenzylamine (**3**), 4-Bromobenzylamine (**4**), 4-Iodobenzylamine (**5**), 4-(Trifluoromethyl)benzylamine (**6**), 4-(Trifluoromethoxy)benzylamine (**7**), 4-Cyanobenzylamine (**8**), 4-Nitrobenzylamine (**9**), 4-Methylbenzylamine (**10**), 4-Methoxybenzylamine (**11**), 4-(Dimethylamino)benzylamine (**12**). Then, to each mixture, 0.5 ml of TEA was added (except **8** and **9**). The mixtures were stirred at 60 °C for a few hours (2-4h) and after that, the solvent was evaporated. Products, derived from respective amine hydrochlorides before evaporation were treated with ethyl acetate and extracted twice with 25 mL of water. All of these products were purified by column chromatography on silica gel (25 cm × 1 cm, silica gel 60, 0.040–0.063 mm/230–400 mesh ASTM, Fluka) with methylene chloride/acetone or methylene chloride/methanol as eluent. After evaporation of the solvent, **1-12** derivatives were obtained as violet powder.

The general synthetic procedure of derivatives of **GDM 1a-12a** together with the analytical data (FT-IR, HRMS, HPLC and elemental data): First, 100 mg (1 eq.) **GDM** amine analogs (**1-12**) was dissolved in 3 mL DMF and then a 1.1 eq. of TMG was added. The mixtures were stirred at rt. for one hour and after that, the products before evaporation were treated with ethyl acetate and extracted twice with 200 mL of water. All of these products were purified by column chromatography on silica gel (25 cm × 1 cm, silica gel 60, 0.040–0.063 mm/230–400 mesh ASTM, Fluka) with methylene chloride/acetone or methylene chloride/methanol as eluent. After evaporation of the solvent, **1a-12a** derivatives were obtained as a yellow powder.

The one-pot synthetic procedure of derivative of **8a** and **9a** and from **GDM** together with the analytical data (FT-IR, HRMS, HPLC and elemental data): First, 200 mg (0.36 mmol) of **GDM** was dissolved in a 4.4 mL mixture of THF/MeOH (10:1) and then a four-fold excess of amine was added (1.44 mmol). Then, to each mixture, 0.5 ml of TEA was added. The mixture was stirred at 60 °C for two hours and after that, the solvent was evaporated. Before evaporation was treated with ethyl acetate and extracted twice with 200 mL of water. All of these products were purified by column chromatography on silica gel (25 cm × 1 cm, silica gel 60, 0.040–0.063 mm/230–400 mesh ASTM, Fluka) with methylene chloride/methanol as eluent. After evaporation of the solvent, **8a** and **9a** derivatives were obtained as a yellow powder.

The one-pot synthetic procedure of derivative of **13a-16a** from **GDM** together with the analytical data (FT-IR, HRMS, HPLC and elemental data): First, 100 mg (0.18 mmol) of **GDM** was dissolved in a 1 mL of DMF and then a two-fold excess of amine was added (0.36 mmol): butylamine (**13a**), allylamine (**14a**), propargylamine (**15a**) and pyridin-4-ylmethanamine (**16a**). Then, to each mixture, 0.18 mmol of TMG was added. The mixture was stirred to the complete disappearance of **GDM** and the intermediate. Before evaporation reaction mixture was treated with ethyl acetate and extracted twice with 200 mL of water. All of these products were purified by column chromatography on silica

gel (25 cm × 1 cm, silica gel 60, 0.040–0.063 mm/230–400 mesh ASTM, Fluka) with methylene chloride/methanol as eluent. After evaporation of the solvent, **13a-16a** derivatives were obtained as a yellow powder.

#### Cyclization reaction tests:

Compound **1** (5 mg, 1 eq.) was dissolved in various solvents (1 mL) depending on the test performed. A stoichiometric amount of various bases has been added (1eq.). All base and solvent combinations are shown in **Table 1S**. The mixture was stirred at room temperature and 5  $\mu$ L sample of reaction mixture was taken to check of the reaction progress (before injection extraction in the solvent system EtOAc:H<sub>2</sub>O was performed, the organic layer was evaporated to dryness and the residue was dissolved in acetonitrile). All HPLC analysis were performed with the use the flow rates were 0.75 mL/min the mobile phase: 35:65 H<sub>2</sub>O/CH<sub>3</sub>CN.

Compounds **1-12** (5 mg, 1 eq.) was dissolved in the 1 mL of DMF. After cooling the reaction mixture to 0 °C 1eq. of TMG was added. The mixture was stirred at room temperature every 10 minutes to 80 minutes 5  $\mu$ L sample of the reaction mixture was taken to check the reaction progress (before injection extraction in the solvent system EtOAc:H<sub>2</sub>O was performed, the organic layer was evaporated to dryness and the residue was dissolved in acetonitrile). All HPLC analysis were performed with the use the flow rates were 0.75 mL/min the mobile phase: 35:65 H<sub>2</sub>O/CH<sub>3</sub>CN.

Details of the reactions are shown in **Table 2S**.

#### Spectral characteristic of a GDM analogs **1-12**:

**Compound 1.** (4*E*,6*Z*,8*S*,9*S*,10*E*,12*S*,13*R*,14*S*,16*R*)-19-(benzylamino)-13-hydroxy-8,14-dimethoxy-4,10,12,16-tetramethyl-3,20,22-trioxo-2-azabicyclo[16.3.1]docosa-1(21),4,6,10,18-pentaen-9-yl carbamate (193 mg, yield 85 %) mp 281-283 °C, HPLC (OD-H, water/acetonitrile = 35/65, flow rate = 0.5 mL/min,  $\lambda$  = 260 nm) tR = 9.461 min (major). Anal. Calcd for C<sub>35</sub>H<sub>45</sub>N<sub>3</sub>O<sub>8</sub>: C, 66.12; H, 7.13; N, 6.61. Found: C, 66.14; H, 7.12; N, 6.60. HRMS (MALDI-TOF) m/z: [M + H]<sup>+</sup> Calcd for C<sub>35</sub>H<sub>45</sub>N<sub>3</sub>O<sub>8</sub> 635.3207; Found 635.1937. FT-IR (KBr):  $\nu_{\text{as}}(\text{N-H})_{\text{carbamate}}=3487.45 \text{ cm}^{-1}$ ,  $\nu_{\text{s}}(\text{N-H})_{\text{carbamate}}=3435.17 \text{ cm}^{-1}$ ,  $\nu(\text{N-H})_{\text{lactam}}=3329.74 \text{ cm}^{-1}$ ,  $\nu(\text{O-H})=3201.94 \text{ cm}^{-1}$ ,  $\nu_{\text{as}}(\text{C-H})=2930.83 \text{ cm}^{-1}$ ,  $\nu_{\text{s}}(\text{C-H})=2824.87 \text{ cm}^{-1}$ ,  $\nu(\text{C=O})_{\text{carbamate}}=1731.60 \text{ cm}^{-1}$ ,  $\nu(\text{C=O})_{\text{lactam}}=1692.48 \text{ cm}^{-1}$ ,  $\nu(\text{C=O})_{\text{quinone}}=1648.57 \text{ cm}^{-1}$ ,  $\nu(\text{C=C})=1612.53 \text{ cm}^{-1}$ ,  $\delta(\text{N-H})_{\text{lactam}}=1578.07 \text{ cm}^{-1}$ ,  $\delta(\text{N-H})_{\text{substituent}}=1580.08 \text{ cm}^{-1}$ ,  $\delta(\text{N-H})_{\text{carbamate}}=1489.51 \text{ cm}^{-1}$ ,  $\nu(\text{C-N})_{\text{carbamate}}=1373.63 \text{ cm}^{-1}$ ,  $\nu(\text{C-O-C})_{\text{carbamate}}=1266.21 \text{ cm}^{-1}$ ,  $\nu(\text{C-O-C})_{\text{methoxy}}=1055.05 \text{ cm}^{-1}$ ,  $\gamma(\text{C-H})_{\text{ar}}=730.00 \text{ cm}^{-1}$ ,  $\gamma(\text{N-H})_{\text{carbamate}}=698.68 \text{ cm}^{-1}$ . <sup>1</sup>H NMR (600 MHz, CDCl<sub>3</sub>)  $\delta$  9.16 (s, 1H, NH-1), 7.41 – 7.37 (m, 2H, H-32,34), 7.37 – 7.33 (m, 1H, H-33), 7.30 (s, 1H, H-19), 7.29 – 7.26 (m, 2H, H-31,35), 6.96 (d,  $J^{\text{H-3,H-4}}=11.6 \text{ Hz}$ , 1H, H-3), 6.58 (td,  $J^{\text{H-3,H-4}}=11.4 \text{ Hz}$ ,  $J^{\text{H-4,H-22}}=1.1 \text{ Hz}$ , 1H, H-4), 6.47 (t,  $J^{\text{NH-17,H-29}}=5.5 \text{ Hz}$ , 1H, NH-17), 5.90 (d,  $J^{\text{H-9,H-10}}=9.7 \text{ Hz}$ , 1H, H-9), 5.88 – 5.84 (m, 1H, H-5), 5.19 (s, 1H, H-7), 4.85 (bs, 2H, NH<sub>2</sub>-24), 4.76 (dd,  $J^2=14.5 \text{ Hz}$ ,  $J^{\text{NH-17,H-29}}=5.8 \text{ Hz}$ , 1H, H-29), 4.62 (dd,  $J^2=14.5 \text{ Hz}$ ,  $J^{\text{NH-17,H-29}}=5.5 \text{ Hz}$ , 1H, H-29), 4.31 (dt,  $J^{\text{H-6,H-7}}=9.8 \text{ Hz}$ ,  $J^{\text{H-4,H-6}}=1.2 \text{ Hz}$ , 1H, H-6), 4.19 (s, 1H, OH-11), 3.58 (ddd,  $J^{\text{H-11,H-12}}=9.0 \text{ Hz}$ ,  $J^{\text{H-10,H-11}}=6.7 \text{ Hz}$ ,  $J^{\text{H-11,H-13}}=2.2 \text{ Hz}$ , 1H, H-11), 3.44 (dt,  $J^{\text{H-11,H-12}}=8.9 \text{ Hz}$ ,  $J^{\text{H-12,H-13}}=2.8 \text{ Hz}$ , 1H, H-12), 3.36 (s, 3H, H-27), 3.27 (s, 3H, H-23), 2.74 (dq,  $J^{\text{H-9,H-10}}=9.1 \text{ Hz}$ ,  $J^{\text{H-10,H-26}}=6.8 \text{ Hz}$ ,  $J^{\text{H-10,H-25}}=2.1 \text{ Hz}$ , 1H, H-10), 2.66 (d,  $J^2=14.1 \text{ Hz}$ , 1H, H-15), 2.45 (dd,  $J^2=14.2 \text{ Hz}$ ,  $J^{\text{H-14,H-15}}=10.3 \text{ Hz}$ , 1H, H-15), 2.02 (d,  $J^{\text{H-4,H-22}}=1.4 \text{ Hz}$ , 3H, H-22), 1.80 (d,  $J^{\text{H-10,H-25}}=1.3 \text{ Hz}$ , 3H, H-25), 1.77 (d,  $J^{\text{H-12,H-13}}=3.1 \text{ Hz}$ , 2H, H-13), 1.70 (bs, 1H, H-14), 1.02 (d,  $J^{\text{H-10,H-26}}=6.4 \text{ Hz}$ , 3H, H-26), 0.99 (d,  $J^{\text{H-14,H-28}}=6.9 \text{ Hz}$ , 3H, H-28). dqd - Doublet of Quartet of Doublets; bs - broad singlet  
<sup>13</sup>C{<sup>1</sup>H} NMR (151 MHz, CDCl<sub>3</sub>)  $\delta$  183.9 (C-18), 181.2 (C-21), 168.5 (C-1), 156.2 (C-24), 144.8 (C-17), 141.4 (C-20), 136.8 (C-30), 136.0 (C-5), 135.1 (C-2), 133.9 (C-9), 132.9 (C-8), 129.3\* (C-32,34), 128.6 (C-33), 127.9\* (C-31,35), 127.1 (C-3), 126.7 (C-4), 109.1 (C-19), 109.0 (C-16), 81.8 (C-7), 81.6 (C-12), 81.4 (C-6), 72.8 (C-11), 57.3 (C-23), 56.9 (C-27), 50.2 (C-29), 35.2 (C-13), 34.6 (C-15), 32.5 (C-10), 28.6 (C-14), 23.1 (C-28), 12.9 (C-22), 12.7 (C-25), 12.5 (C-26).

**Compound 2.** (4*E*,6*Z*,8*S*,9*S*,10*E*,12*S*,13*R*,14*S*,16*R*)-19-((4-fluorobenzyl)amino)-13-hydroxy-8,14-dimethoxy-4,10,12,16-tetramethyl-3,20,22-trioxo-2-azabicyclo[16.3.1]docosa-1(21),4,6,10,18-pentaen-9-yl carbamate (156 mg, yield 67 %) mp 115-117 °C, HPLC (OD-H, water/acetonitrile = 35/65, flow rate = 0.5 mL/min,  $\lambda$  = 260 nm) tR = 9.195 min (major). Anal. Calcd for C<sub>35</sub>H<sub>44</sub>FN<sub>3</sub>O<sub>8</sub>: C, 64.30; H, 6.78; F, 2.91; N, 6.43. Found C, 64.31; H, 6.77; F, 2.90; N, 6.42. HRMS (MALDI-TOF) m/z: [M + H]<sup>+</sup> Calcd for C<sub>35</sub>H<sub>44</sub>FN<sub>3</sub>O<sub>8</sub> 653.3112; Found 653.3715. FT-IR (KBr):  $\nu_{\text{as}}(\text{N-H})_{\text{carbamate}}=3507.71 \text{ cm}^{-1}$ ,  $\nu_{\text{s}}(\text{N-H})_{\text{carbamate}}=3438.28 \text{ cm}^{-1}$ ,  $\nu_{\text{s}}(\text{N-H})_{\text{lactam}}=3330.29 \text{ cm}^{-1}$ ,  $\nu(\text{O-H})=3204.89 \text{ cm}^{-1}$ ,  $\nu_{\text{as}}(\text{C-H})=2931.34 \text{ cm}^{-1}$ ,  $\nu_{\text{s}}(\text{C-H})=2825.13 \text{ cm}^{-1}$ ,  $\nu(\text{C=O})_{\text{carbamate}}=1733.74 \text{ cm}^{-1}$ ,

$\nu(\text{C}=\text{O})_{\text{lactam}}=1695.38 \text{ cm}^{-1}$ ,  $\nu(\text{C}=\text{O})_{\text{quinone}}=1648.40 \text{ cm}^{-1}$ ,  $\nu(\text{C}=\text{C})=1609.45 \text{ cm}^{-1}$ ,  $\delta(\text{N-H})^*_{\text{lactam,substituent}}=1584.00 \text{ cm}^{-1}$ ,  $\delta(\text{N-H})_{\text{carbamate}}=1488.08 \text{ cm}^{-1}$ ,  $\nu(\text{C-F})=1373.32 \text{ cm}^{-1}$ ,  $\nu(\text{C-N})_{\text{carbamate}}=1324.11 \text{ cm}^{-1}$ ,  $\nu(\text{C-O-C})_{\text{carbamate}}=1191.72 \text{ cm}^{-1}$ ,  $\nu(\text{C-O-C})_{\text{substituent}}=1100.15 \text{ cm}^{-1}$ ,  $\nu(\text{C-O-C})_{\text{methoxy}}=1054.33 \text{ cm}^{-1}$ ,  $\gamma(\text{C-H})_{\text{carbamate}}=783.84 \text{ cm}^{-1}$ ,  $\gamma(\text{C-H})_{\text{ar}}=730.44 \text{ cm}^{-1}$ ,  $\gamma(\text{N-H})_{\text{carbamate}}=689.15 \text{ cm}^{-1}$ .  $^1\text{H NMR}$  (600 MHz,  $\text{CDCl}_3$ )  $\delta$  9.15 (s, 1H, NH-1), 7.30 (s, 1H, H-19), 7.27 – 7.24 (m, 2H, H-31,35), 7.10 – 7.05 (m, 2H, H-32,34), 6.95 (d,  $J^3_{\text{H-3,H-4}}=11.7 \text{ Hz}$ , 1H, H-3), 6.58 (td,  $J^3_{\text{H-3,H-4}}=11.4 \text{ Hz}$ ,  $J^4_{\text{H-4,H-22}}=1.1 \text{ Hz}$ , 1H, H-4), 6.38 (t,  $J^3_{\text{NH-17,H-29}}=5.6 \text{ Hz}$ , 1H, NH-17), 5.90 – 5.84 (m, 2H, H-5,9), 5.18 (s, 1H, H-7), 4.87 (bs, 2H,  $\text{NH}_2$ -24), 4.72 (dd,  $J^2=14.5 \text{ Hz}$ ,  $J^3_{\text{NH-17,H-29}}=5.7 \text{ Hz}$ , 1H, H-29), 4.59 (dd,  $J^2=14.5 \text{ Hz}$ ,  $J^3_{\text{NH-17,H-29}}=5.5 \text{ Hz}$ , 1H, H-29), 4.31 (dt,  $J^3_{\text{H-6,H-7}}=9.8 \text{ Hz}$ ,  $J^3_{\text{H-4,H-6}}=1.2 \text{ Hz}$ , 1H, H-6), 4.11 (bs, 1H, OH-11), 3.57 (ddd,  $J^3_{\text{H-11,H-12}}=8.9 \text{ Hz}$ ,  $J^3_{\text{H-10,H-11}}=6.5 \text{ Hz}$ ,  $J^4_{\text{H-11,H-13}}=2.3 \text{ Hz}$ , 1H, H-11), 3.44 (dt,  $J^3_{\text{H-11,H-12}}=8.9 \text{ Hz}$ ,  $J^3_{\text{H-12,H-13}}=2.8 \text{ Hz}$ , 1H, H-12), 3.36 (s, 3H, H-27), 3.27 (s, 3H, H-23), 2.74 (tt,  $J^3_{\text{H-9,H-10}}=9.3 \text{ Hz}$ ,  $J^3_{\text{H-10,H-26}}=6.9 \text{ Hz}$ , 1H, H-10), 2.69 – 2.64 (m, 1H, H-15), 2.41 (dd,  $J^2=14.1 \text{ Hz}$ ,  $J^3_{\text{H-14,H-15}}=10.3 \text{ Hz}$ , 1H, H-15), 2.02 (d,  $J^4_{\text{H-4,H-22}}=1.4 \text{ Hz}$ , 3H, H-22), 1.79 (d,  $J^4_{\text{H-10,H-25}}=1.4 \text{ Hz}$ , 3H, H-25), 1.76 (d,  $J^3_{\text{H-12,H-13}}=3.1 \text{ Hz}$ , 2H, H-13), 1.70 (bs, 1H, H-14), 1.01 (d,  $J^3_{\text{H-10,H-26}}=6.5 \text{ Hz}$ , 3H, H-26), 0.99 (d,  $J^3_{\text{H-14,H-28}}=6.9 \text{ Hz}$ , 3H, H-28). bs - broad singlet  
 $^{13}\text{C}\{1\text{H}\}$  NMR (151 MHz,  $\text{CDCl}_3$ )  $\delta$  183.9 (C-18), 181.3 (C-21), 168.5 (C-1), 162.8 (d,  $J^1=247.5 \text{ Hz}$ , C-33), 156.2 (C-24), 144.7 (C-17), 141.3 (C-20), 136.1 (C-5), 135.1 (C-2), 133.8 (C-9), 133.0 (C-8), 132.6 (d,  $J^2=3.1 \text{ Hz}$ , C-30), 129.7\* (d,  $J^3=8.2 \text{ Hz}$ , C-31,35), 127.1 (C-3), 126.7 (C-4), 116.3\* (d,  $J^2=21.5 \text{ Hz}$ , C-32,34), 109.3 (C-19), 109.0 (C-16), 81.8 (C-7), 81.5 (C-12), 81.3 (C-6), 72.8 (C-11), 57.3 (C-23), 56.9 (C-27), 49.5 (C-29), 35.1 (C-13), 34.6 (C-15), 32.5 (C-10), 28.7 (C-14), 23.1 (C-28), 12.9 (C-22), 12.7 (C-25), 12.5 (C-26).

**Compound 3.** (4*E*,6*Z*,8*S*,9*S*,10*E*,12*S*,13*R*,14*S*,16*R*)-19-((4-chlorobenzyl)amino)-13-hydroxy-8,14-dimethoxy-4,10,12,16-tetramethyl-3,20,22-trioxo-2-azabicyclo[16.3.1]docosa-1(21),4,6,10,18-pentaen-9-yl carbamate (172 mg, yield 72 %), mp 201–203 °C, HPLC (OD-H, water/acetonitrile = 35/65, flow rate = 0.5 mL/min,  $l = 260 \text{ nm}$ ) tR = 11.507 min (major). Anal. Calcd for  $\text{C}_{35}\text{H}_{44}\text{ClN}_3\text{O}_8$ : C, 62.73; H, 6.62; Cl, 5.29; N, 6.27. Found C, 62.72; H, 6.63; Cl, 5.28; N, 6.28. HRMS (MALDI-TOF) m/z:  $[\text{M} + \text{H}]^+$  Calcd for  $\text{C}_{35}\text{H}_{44}\text{ClN}_3\text{O}_8$  669.2817; Found 669.3478. FT-IR (KBr):  $\nu_{\text{as}}(\text{N-H})_{\text{carbamate}}=3439.08 \text{ cm}^{-1}$ ,  $\nu_{\text{s}}(\text{N-H})_{\text{lactam}}=3325.64 \text{ cm}^{-1}$ ,  $\nu(\text{O-H})=3199.48 \text{ cm}^{-1}$ ,  $\nu_{\text{as}}(\text{C-H})=2929.72 \text{ cm}^{-1}$ ,  $\nu_{\text{s}}(\text{C-H})=2875.63 \text{ cm}^{-1}$ ,  $\nu(\text{C}=\text{O})_{\text{carbamate}}=1733.44 \text{ cm}^{-1}$ ,  $\nu(\text{C}=\text{O})_{\text{lactam}}=1691.34 \text{ cm}^{-1}$ ,  $\nu(\text{C}=\text{O})_{\text{quinone}}=1648.87 \text{ cm}^{-1}$ ,  $\nu(\text{C}=\text{C})=1608.09 \text{ cm}^{-1}$ ,  $\delta(\text{N-H})^*_{\text{lactam,substituent}}=1585.91 \text{ cm}^{-1}$ ,  $\delta(\text{N-H})_{\text{carbamate}}=1490.32 \text{ cm}^{-1}$ ,  $\nu(\text{C-Cl})=1373.17 \text{ cm}^{-1}$ ,  $\nu(\text{C-N})_{\text{carbamate}}=1323.57 \text{ cm}^{-1}$ ,  $\nu(\text{C-O-C})_{\text{carbamate}}=1190.93 \text{ cm}^{-1}$ ,  $\nu(\text{C-O-C})_{\text{methoxy}}=1056.32 \text{ cm}^{-1}$ ,  $\gamma(\text{C-H})_{\text{ar}}=783.75 \text{ cm}^{-1}$ ,  $\gamma(\text{N-H})_{\text{carbamate}}=730.21 \text{ cm}^{-1}$ .  $^1\text{H NMR}$  (600 MHz,  $\text{CDCl}_3$ )  $\delta$  9.14 (s, 1H, NH-1), 7.38 – 7.36 (m, 2H, H-32,34), 7.31 (s, 1H, H-19), 7.23 – 7.20 (m, 2H, H-31,35), 6.96 (d,  $J^3_{\text{H-3,H-4}}=11.6 \text{ Hz}$ , 1H, H-3), 6.58 (ddd,  $J^3_{\text{H-3,H-4}}=11.4 \text{ Hz}$ ,  $J^3_{\text{H-4,H-5}}=11.0 \text{ Hz}$ ,  $J^4_{\text{H-4,H-22}}=1.1 \text{ Hz}$ , 1H, H-4), 6.40 (t,  $J^3_{\text{NH-17,H-29}}=5.8 \text{ Hz}$ , 1H, NH-17), 5.90 – 5.88 (m, 1H, H-9), 5.87 – 5.84 (m, 1H, H-5), 5.19 (d,  $J^4_{\text{H-5,H-7}}=1.1 \text{ Hz}$ , 1H, H-7), 4.77 (bs, 2H,  $\text{NH}_2$ -24), 4.72 (dd,  $J^2=14.7 \text{ Hz}$ ,  $J^3_{\text{NH-17,H-29}}=5.9 \text{ Hz}$ , 1H, H-29), 4.60 (dd,  $J^2=14.7 \text{ Hz}$ ,  $J^3_{\text{NH-17,H-29}}=5.6 \text{ Hz}$ , 1H, H-29), 4.31 (dt,  $J^3_{\text{H-6,H-7}}=9.8 \text{ Hz}$ ,  $J^3_{\text{H-4,H-6}}=1.2 \text{ Hz}$ , 1H, H-6), 4.07 (s, 1H, OH-11), 3.57 (d,  $J^3_{\text{H-11,H-12}}=8.8 \text{ Hz}$ , 1H, H-11), 3.44 (dt,  $J^3_{\text{H-11,H-12}}=8.8 \text{ Hz}$ ,  $J^3_{\text{H-12,H-13}}=2.8 \text{ Hz}$ , 1H, H-12), 3.36 (s, 3H, H-27), 3.27 (s, 3H, H-23), 2.74 (dq,  $J^3_{\text{H-9,H-10}}=9.3 \text{ Hz}$ ,  $J^3_{\text{H-10,H-26}}=6.9 \text{ Hz}$ ,  $J^4_{\text{H-10,H-25}}=2.3 \text{ Hz}$ , 1H, H-10), 2.67 – 2.63 (m, 1H, H-12), 2.38 (dd,  $J^2=14.1 \text{ Hz}$ ,  $J^3_{\text{H-14,H-15}}=10.2 \text{ Hz}$ , 1H, H-15), 2.03 (d,  $J^4_{\text{H-4,H-22}}=1.4 \text{ Hz}$ , 3H, H-22), 1.80 (d,  $J^4_{\text{H-10,H-25}}=1.3 \text{ Hz}$ , 3H, H-25), 1.76 (d,  $J^3_{\text{H-12,H-13}}=2.8 \text{ Hz}$ , 2H, H-13), 1.65 (bs, 1H, H-14), 1.02 – 0.98 (m, 6H, H-26,28). dqd - Doublet of Quartet of Doublets; bs - broad singlet  
 $^{13}\text{C}\{1\text{H}\}$  NMR (151 MHz,  $\text{CDCl}_3$ )  $\delta$  183.9 (C-18), 181.4 (C-21), 168.5 (C-1), 156.1 (C-24), 144.7 (C-17), 141.3 (C-20), 136.1 (C-5), 135.3 (C-30), 135.1 (C-2), 134.5 (C-33), 133.8 (C-9), 133.0 (C-8), 129.5\* (C-31,35), 129.2\* (C-32,34), 127.1 (C-3), 126.7 (C-4), 109.4 (C-19), 109.1 (C-16), 81.8 (C-7), 81.5 (C-12), 81.3 (C-6), 72.8 (C-11), 57.3 (C-23), 56.9 (C-27), 49.5 (C-29), 35.2 (C-13), 34.6 (C-15), 32.5 (C-10), 28.7 (C-14), 23.1 (C-28), 12.9 (C-22), 12.8 (C-25), 12.5 (C-26).

**Compound 4.** (4*E*,6*Z*,8*S*,9*S*,10*E*,12*S*,13*R*,14*S*,16*R*)-19-((4-bromobenzyl)amino)-13-hydroxy-8,14-dimethoxy-4,10,12,16-tetramethyl-3,20,22-trioxo-2-azabicyclo[16.3.1]docosa-1(21),4,6,10,18-pentaen-9-yl carbamate (168 mg, yield 66 %), mp 228–231 °C, HPLC (OD-H, water/acetonitrile = 35/65, flow rate = 0.5 mL/min,  $l = 260 \text{ nm}$ ) tR = 12.488 min (major). Anal. Calcd for  $\text{C}_{35}\text{H}_{44}\text{BrN}_3\text{O}_8$ : C, 58.82; H, 6.21; Br, 11.18; N, 5.88. Found C, 58.81; H, 6.22; Br, 11.19; N, 5.87. HRMS (MALDI-TOF) m/z:  $[\text{M} + \text{H}]^+$  Calcd for  $\text{C}_{35}\text{H}_{44}\text{BrN}_3\text{O}_8$  713.4129; Found 713.2312. FT-IR (KBr):  $\nu_{\text{as}}(\text{N-H})_{\text{carbamate}}=3490.76 \text{ cm}^{-1}$ ,  $\nu_{\text{s}}(\text{N-H})_{\text{carbamate}}=3432.86 \text{ cm}^{-1}$ ,  $\nu_{\text{s}}(\text{N-H})_{\text{lactam}}=3322.39 \text{ cm}^{-1}$ ,  $\nu(\text{O-H})=3198.39 \text{ cm}^{-1}$ ,  $\nu_{\text{as}}(\text{C-H})=2930.23 \text{ cm}^{-1}$ ,  $\nu_{\text{s}}(\text{C-H})=2873.61 \text{ cm}^{-1}$ ,  $\nu(\text{C}=\text{O})_{\text{carbamate}}=1733.50 \text{ cm}^{-1}$ ,  $\nu(\text{C}=\text{O})_{\text{lactam}}=1692.90 \text{ cm}^{-1}$ ,  $\nu(\text{C}=\text{O})_{\text{quinone}}=1649.30 \text{ cm}^{-1}$ ,  $\nu(\text{C}=\text{C})=1586.02 \text{ cm}^{-1}$ ,  $\delta(\text{N-H})=1488.14 \text{ cm}^{-1}$ ,  $\nu(\text{C-Br})=1373.08 \text{ cm}^{-1}$ ,  $\nu(\text{C-N})_{\text{carbamate}}=1326.74 \text{ cm}^{-1}$ ,  $\nu(\text{C-O-C})_{\text{carbamate}}=1190.05 \text{ cm}^{-1}$ ,  $\nu(\text{C-O-C})_{\text{substituent}}=1099.49 \text{ cm}^{-1}$ ,  $\nu(\text{C-O-C})_{\text{methoxy}}=1070.97 \text{ cm}^{-1}$ ,  $\gamma(\text{C-H})_{\text{ar}}=788.58 \text{ cm}^{-1}$ ,  $\gamma(\text{N-H})_{\text{carbamate}}=729.84 \text{ cm}^{-1}$ .  $^1\text{H NMR}$  (600 MHz,  $\text{CDCl}_3$ )  $\delta$  9.14 (s, 1H, NH-1), 7.54 – 7.51 (m, 2H, H-32,34), 7.31 (s, 1H, H-19), 7.17 – 7.14 (m, 2H, H-31,35), 6.95 (d,  $J^3_{\text{H-3,H-4}}=11.6 \text{ Hz}$ , 1H, H-3), 6.58 (td,  $J^3_{\text{H-3,H-4}}=11.4 \text{ Hz}$ ,  $J^4_{\text{H-4,H-22}}=1.1 \text{ Hz}$ , 1H, H-4), 6.41 (t,  $J^3_{\text{NH-17,H-29}}=5.5 \text{ Hz}$ , 1H, NH-17), 5.90 – 5.84 (m, 2H, H-5,9), 5.19 (s, 1H, H-7), 4.82 (bs, 2H,  $\text{NH}_2$ -24), 4.73 – 4.68 (m, 1H, H-29), 4.59 (dd,  $J^2=14.8 \text{ Hz}$ ,  $J^3_{\text{NH-17,H-29}}=5.7 \text{ Hz}$ , 1H, H-29), 4.31 (dt,  $J^3_{\text{H-6,H-7}}=9.7 \text{ Hz}$ ,  $J^3_{\text{H-4,H-6}}=1.2 \text{ Hz}$ , 1H, H-6), 4.07 (s, 1H, OH-11), 3.57 (ddd,  $J^3_{\text{H-11,H-12}}=9.0 \text{ Hz}$ ,  $J^3_{\text{H-10,H-11}}=6.6 \text{ Hz}$ ,  $J^4_{\text{H-11,H-13}}=2.0 \text{ Hz}$ , 1H, H-11), 3.43 (dt,  $J^3_{\text{H-11,H-12}}=9.0$

Hz,  $J^3_{\text{H-12,H-13}} = 2.8$  Hz, 1H, H-12), 3.36 (s, 3H, H-27), 3.27 (s, 3H, H-23), 2.74 (tt,  $J^3_{\text{H-9,H-10}} = 9.2$  Hz,  $J^3_{\text{H-10,H-26}} = 6.8$  Hz, Hz, 1H, H-10), 2.67 – 2.62 (m, 1H, H-15), 2.37 (dd,  $J^2 = 14.1$  Hz,  $J^3_{\text{H-14,H-15}} = 10.1$  Hz, 1H, H-15), 2.02 (d,  $J^4_{\text{H-4,H-22}} = 1.4$  Hz, 3H, H-22), 1.80 (d,  $J^4_{\text{H-10,H-25}} = 1.3$  Hz, 3H, H-25), 1.75 (d,  $J^3_{\text{H-12,H-13}} = 2.8$  Hz, 2H, H-13), 1.74 (bs, 1H, H-14), 1.02 – 0.98 (m, 6H, H-26,28). bs - broad singlet  
 $^{13}\text{C}\{1\text{H}\}$  NMR (151 MHz,  $\text{CDCl}_3$ )  $\delta$  183.9 (C-18), 181.4 (C-21), 168.5 (C-1), 156.2 (C-24), 144.7 (C-17), 141.3 (C-20), 136.1 (C-5), 135.9 (C-30), 135.1 (C-2), 133.8 (C-9), 133.0 (C-8), 132.5\* (C-32,34), 129.5\* (C-31,35), 127.1 (C-3), 126.7 (C-4), 122.5 (C-33), 109.5 (C-19), 109.0 (C-16), 81.8 (C-7), 81.5 (C-12), 81.3 (C-6), 72.8 (C-11), 57.3 (C-23), 56.9 (C-27), 49.5 (C-29), 35.1 (C-13), 34.6 (C-15), 32.5 (C-10), 28.7 (C-14), 23.1 (C-28), 12.9 (C-22), 12.7 (C-25), 12.5 (C-26).

**Compound 5.** (4*E*,6*Z*,8*S*,9*S*,10*E*,12*S*,13*R*,14*S*,16*R*)-13-hydroxy-19-((4-iodobenzyl)amino)-8,14-dimethoxy-4,10,12,16-tetramethyl-3,20,22-trioxo-2-azabicyclo[16.3.1]docosa-1(21),4,6,10,18-pentaen-9-yl carbamate, (160 mg, 59%). HPLC (OD-H, water/acetonitrile = 35/65, flow rate = 0.5 mL/min,  $l = 260$  nm)  $t_R = 13.911$  min (major). Anal. Calcd for  $\text{C}_{35}\text{H}_{44}\text{IN}_3\text{O}_8$ : C, 55.19; H, 5.82; I, 16.66; N, 5.52. Found: C, 55.20; H, 5.84; I, 16.65; N, 5.51. HRMS (MALDI-TOF)  $m/z$ :  $[\text{M} + \text{H}]^+$  Calcd for  $\text{C}_{35}\text{H}_{44}\text{IN}_3\text{O}_8$  761.2173; Found 761.2176. FT-IR (KBr):  $\nu_{\text{as}}(\text{N-H})_{\text{carbamate}} = 3489.48$   $\text{cm}^{-1}$ ,  $\nu_{\text{s}}(\text{N-H})_{\text{carbamate}} = 3433.25$   $\text{cm}^{-1}$ ,  $\nu_{\text{s}}(\text{N-H})_{\text{lactam}} = 3323.38$   $\text{cm}^{-1}$ ,  $\nu(\text{O-H}) = 3191.22$   $\text{cm}^{-1}$ ,  $\nu_{\text{s}}(\text{C-H}) = 2929.43$   $\text{cm}^{-1}$ ,  $\nu(\text{C=O})_{\text{carbamate}} = 1733.03$   $\text{cm}^{-1}$ ,  $\nu(\text{C=O})_{\text{lactam}} = 1695.73$   $\text{cm}^{-1}$ ,  $\nu(\text{C=O})_{\text{quinone}} = 1646.62$   $\text{cm}^{-1}$ ,  $\nu(\text{C=C}) = 1615.53$   $\text{cm}^{-1}$ ,  $\delta(\text{N-H})^*_{\text{lactam,substituent}} = 1590.95$   $\text{cm}^{-1}$ ,  $\delta(\text{N-H})_{\text{carbamate}} = 1485.53$   $\text{cm}^{-1}$ ,  $\nu(\text{C-N})_{\text{carbamate}} = 1326.30$   $\text{cm}^{-1}$ ,  $\nu(\text{C-O-C})_{\text{carbamate}} = 1190.30$   $\text{cm}^{-1}$ ,  $\nu(\text{C-O-C})_{\text{substituent}} = 1100.30$   $\text{cm}^{-1}$ ,  $\nu(\text{C-O-C})_{\text{methoxy}} = 1030.23$   $\text{cm}^{-1}$ ,  $\gamma(\text{C-H})_{\text{carbamate}} = 786.67$   $\text{cm}^{-1}$ ,  $\gamma(\text{N-H})_{\text{carbamate}} = 707.18$   $\text{cm}^{-1}$ .  $^1\text{H}$  NMR (500 MHz,  $\text{CDCl}_3$ , 25°C)  $\delta$  9.13 (s, 1H, NH-1), 7.74 – 7.70 (m, 2H, H-32,34), 7.30 (s, 1H, H-19), 7.04 – 7.00 (m, 2H, H-31,35), 6.95 (d,  $J^3_{\text{H3,H4}} = 11.7$  Hz, 1H, H-3), 6.62 – 6.54 (m, 1H, H-4), 6.41 (t,  $J^3_{\text{H29,NH17}} = 5.8$  Hz, 1H, NH-17), 5.91 – 5.85 (m, 2H, H-5,9), 5.19 (s, 1H, H-7), 4.84 (s, 2H, NH<sub>2</sub>-24), 4.69 (dd,  $J^2 = 14.8$  Hz,  $J^3_{\text{H29,NH17}} = 5.9$  Hz, 1H, H-29), 4.58 (dd,  $J^2 = 14.8$  Hz,  $J^3_{\text{H29,NH17}} = 5.7$  Hz, 1H, H-29), 4.33 – 4.29 (m, 1H, H-6), 4.05 (s, 1H, OH-11), 3.59 – 3.54 (m, 1H, H-11), 3.45 – 3.41 (m, 1H, H-12), 3.36 (s, 3H, H-27), 3.27 (s, 3H, H-23), 2.78 – 2.70 (m, 1H, H-10), 2.67 – 2.61 (m, 1H, H-15), 2.36 (dd,  $J^2 = 14.1$  Hz,  $J^3_{\text{H15,H14}} = 10.1$  Hz, 1H, H-15), 2.02 (d,  $J^4_{\text{H3,H22}} = 1.3$  Hz, 3H, H-22), 1.79 (d,  $J^4_{\text{H9,H25}} = 1.4$  Hz, 3H, H-25), 1.77 – 1.73 (m, 2H, H-13), 1.65 (s, 1H, H-14), 1.00 (d,  $J^3_{\text{H10,H26}} = 7.4$  Hz, 3H, H-26), 0.99 (d,  $J^3_{\text{H14,H28}} = 6.9$  Hz, 3H, H-28).  $^{13}\text{C}\{1\text{H}\}$  NMR (126 MHz,  $\text{CDCl}_3$ , 25°C)  $\delta$  183.9 (C-18), 181.4 (C-21), 168.5 (C-1), 156.2 (C-24), 144.7 (C-17), 141.3 (C-20), 138.4\* (C-32,34), 136.5 (C-30), 136.1 (C-5), 135.1 (C-2), 133.8 (C-9), 133.0 (C-8), 129.6\* (C-31,35), 127.1 (C-3), 126.7 (C-4), 109.5 (C-16), 109.0 (C-19), 94.1 (C-33), 81.8 (C-7), 81.5 (C-6), 81.3 (C-12), 72.8 (C-11), 57.3 (C-23), 56.9 (C-27), 49.6 (C-29), 35.1 (C-13), 34.6 (C-15), 32.5 (C-10), 28.7 (C-14), 23.1 (C-28), 12.9 (C-25), 12.7 (C-22), 12.5 (C-26). (\*-overlapped)

**Compound 6.** (4*E*,6*Z*,8*S*,9*S*,10*E*,12*S*,13*R*,14*S*,16*R*)-13-hydroxy-8,14-dimethoxy-4,10,12,16-tetramethyl-3,20,22-trioxo-19-((4-(trifluoromethyl)benzyl)amino)-2-azabicyclo[16.3.1]docosa-1(21),4,6,10,18-pentaen-9-yl carbamate (138 mg, yield 55 %), mp 240-242 °C, HPLC (OD-H, water/acetonitrile = 35/65, flow rate = 0.5 mL/min,  $l = 260$  nm)  $t_R = 11.415$  min (major). Anal. Calcd for  $\text{C}_{36}\text{H}_{44}\text{F}_3\text{N}_3\text{O}_8$ : C, 61.44; H, 6.30; F, 8.10; N, 5.97. Found: C, 61.42; H, 6.31; F, 8.11; N, 5.95. HRMS (MALDI-TOF)  $m/z$ :  $[\text{M} + \text{H}]^+$  Calcd for  $\text{C}_{36}\text{H}_{44}\text{F}_3\text{N}_3\text{O}_8$  703.3081; Found 703.1479. FT-IR (KBr):  $\nu_{\text{as}}(\text{N-H})_{\text{carbamate}} = 3494.61$   $\text{cm}^{-1}$ ,  $\nu_{\text{s}}(\text{N-H})_{\text{carbamate}} = 3433.17$   $\text{cm}^{-1}$ ,  $\nu_{\text{s}}(\text{N-H})_{\text{lactam}} = 3334.37$   $\text{cm}^{-1}$ ,  $\nu(\text{O-H}) = 3197.32$   $\text{cm}^{-1}$ ,  $\nu_{\text{as}}(\text{C-H}) = 2930.96$   $\text{cm}^{-1}$ ,  $\nu_{\text{s}}(\text{C-H}) = 2885.76$   $\text{cm}^{-1}$ ,  $\nu(\text{C=O})_{\text{carbamate}} = 1737.55$   $\text{cm}^{-1}$ ,  $\nu(\text{C=O})_{\text{lactam}} = 1696.51$   $\text{cm}^{-1}$ ,  $\nu(\text{C=O})_{\text{quinone}} = 1647.55$   $\text{cm}^{-1}$ ,  $\nu(\text{C=C}) = 1619.37$   $\text{cm}^{-1}$ ,  $\delta(\text{N-H})^*_{\text{lactam,substituent}} = 1593.01$   $\text{cm}^{-1}$ ,  $\delta(\text{N-H})_{\text{carbamate}} = 1493.50$   $\text{cm}^{-1}$ ,  $\nu(\text{C-N})_{\text{carbamate}} = 1326.45$   $\text{cm}^{-1}$ ,  $\nu(\text{C-O-C})_{\text{carbamate}} = 1190.36$   $\text{cm}^{-1}$ ,  $\nu(\text{C-O-C})_{\text{substituent}} = 1129.14$   $\text{cm}^{-1}$ ,  $\nu(\text{C-O-C})_{\text{methoxy}} = 1067.06$   $\text{cm}^{-1}$ ,  $\gamma(\text{C-H})_{\text{ar}} = 786.19$   $\text{cm}^{-1}$ ,  $\gamma(\text{N-H})_{\text{carbamate}} = 706.58$   $\text{cm}^{-1}$ .  $^1\text{H}$  NMR (600 MHz,  $\text{CDCl}_3$ )  $\delta$  9.13 (s, 1H, NH-1), 7.66 (d,  $J^3_{\text{H-31,35,H-32,34}} = 8.0$  Hz, 2H, H-32,34), 7.40 (d,  $J^3_{\text{H-31,35,H-32,34}} = 8.0$  Hz, 2H, H-31,35), 7.32 (s, 1H, H-19), 6.96 (d,  $J^3_{\text{H-3,H-4}} = 11.6$  Hz, 1H, H-3), 6.61 – 6.55 (m, 1H, H-4), 6.48 (t,  $J^3_{\text{NH-17,H-29}} = 6.0$  Hz, 1H, NH-17), 5.90 – 5.84 (m, 2H, H-5,9), 5.19 (s, 1H, H-7), 5.01 (bs, 2H, NH<sub>2</sub>-24), 4.81 (dd,  $J^2 = 15.1$  Hz,  $J^3_{\text{NH-17,H-29}} = 6.1$  Hz, 1H, H-29), 4.72 (dd,  $J^2 = 15.1$  Hz,  $J^3_{\text{NH-17,H-29}} = 5.9$  Hz, 1H, H-29), 4.34 – 4.28 (m, 1H, H-6), 3.99 (bs, 1H, OH-11), 3.59 – 3.54 (m, 1H, H-11), 3.45 – 3.40 (m, 1H, H-12), 3.35 (s, 3H, H-27), 3.27 (s, 3H, H-23), 2.74 (ddt,  $J^3_{\text{H-9,H-10}} = 9.5$  Hz,  $J^3_{\text{H-10,H-26}} = 7.0$  Hz,  $J^3_{\text{H-10,H-11}} = 4.2$  Hz, 1H, H-10), 2.63 (d,  $J^2 = 14.2$  Hz, 1H, H-15), 2.33 (dd,  $J^2 = 14.2$  Hz,  $J^3_{\text{H-14,H-15}} = 10.1$  Hz, 1H, H-15), 2.02 (d,  $J^4_{\text{H-4,H-22}} = 1.3$  Hz, 3H, H-22), 1.79 (d,  $J^4_{\text{H-9,H-25}} = 1.4$  Hz, 3H, H-25), 1.75 (bs, 1H, H-14), 1.67 (bs, 2H, H-13), 1.01 (d,  $J^3_{\text{H-10,H-26}} = 6.9$  Hz, 3H, H-26), 0.99 (d,  $J^3_{\text{H-14,H-28}} = 6.9$  Hz, 3H, H-28). bs - broad singlet  
 $^{13}\text{C}\{1\text{H}\}$  NMR (151 MHz,  $\text{CDCl}_3$ )  $\delta$  183.9 (C-18), 181.5 (C-21), 168.5 (C-1), 156.2 (C-24), 144.7 (C-17), 141.2 (C-20), 140.9 (C-30), 136.1 (C-5), 135.0 (C-2), 133.7 (C-9), 133.0 (C-8), 129.9 (C-33), 128.0\* (C-31,32,34,35), 127.2 (C-3), 126.4 (C-36), 126.3 (C-4), 109.7 (C-19), 109.1 (C-16), 81.8 (C-7), 81.5 (C-12), 81.3 (C-6), 72.8 (C-11), 57.3 (C-23), 56.9 (C-27), 49.4 (C-29), 35.1 (C-13), 34.5 (C-15), 32.5 (C-10), 28.7 (C-14), 23.1 (C-28), 13.0 (C-22), 12.7 (C-25), 12.6 (C-26).

**Compound 7.** (4*E*,6*Z*,8*S*,9*S*,10*E*,12*S*,13*R*,14*S*,16*R*)-13-hydroxy-8,14-dimethoxy-4,10,12,16-tetramethyl-3,20,22-trioxo-19-((4-(trifluoromethoxy)benzyl)amino)-2-azabicyclo[16.3.1]docosa-1(21),4,6,10,18-pentaen-9-yl





<sup>1</sup>H-NMR (600 MHz, CDCl<sub>3</sub>) δ 6.3 (s, 1H, H-29), 4.79 (bs, 2H, NH<sub>2</sub>-24), 4.31 (dt,  $J^3_{H-6,H-7}=9.5$  Hz,  $J^3_{H-4,H-6}=1.2$  Hz, 1H, H-6), 3.85 (bs, 1H, OH-11), 3.56 (d,  $J^3_{H-11,H-12}=8.7$  Hz, 1H, H-11), 3.42 (dt,  $J^3_{H-11,H-12}=8.9$  Hz,  $J^3_{H-12,H-13}=2.7$  Hz, 1H, H-12), 3.35 (s, 3H, H-27), 3.27 (s, 3H, H-23), 2.74 (tt,  $J^3_{H-9,H-10}=9.3$  Hz,  $J^3_{H-10,H-26}=6.8$  Hz, 1H, H-10), 2.61 (d,  $J^2=15.3$  Hz, 1H, H-15), 2.25 (dd,  $J^2=14.1$  Hz,  $J^3_{H-14,H-15}=10.0$  Hz, 1H, H-15), 2.03 (d,  $J^4_{H-4,H-22}=1.3$  Hz, 3H, H-22), 1.79 (d,  $J^4_{H-10,H-25}=1.3$  Hz, 3H, H-25), 1.76 – 1.70 (m, 1H, H-14), 1.69 – 1.63 (m, 2H, H-13), 1.04 – 0.98 (m, 6H, H-26,28). bs - broad singlet

<sup>13</sup>C{<sup>1</sup>H} NMR (151 MHz, CDCl<sub>3</sub>) δ 183.9 (C-18), 181.2 (C-21), 168.5 (C-1), 156.2 (C-24), 148.0 (C-30), 144.6 (C-30), 144.3 (C-17), 141.1 (C-20), 136.2 (C-5), 135.0 (C-2), 133.6 (C-9), 133.1 (C-8), 128.3\* (C-31,35), 127.2 (C-3), 126.6 (C-4), 124.5\* (C-32,34), 110.1 (C-19), 109.2 (C-16), 81.7 (C-7), 81.4 (C-12), 81.3 (C-6), 72.8 (C-11), 57.3 (C-23), 56.9 (C-27), 49.1 (C-29), 35.1 (C-13), 34.5 (C-15), 32.5 (C-10), 28.7 (C-14), 23.1 (C-28), 13.0 (C-22), 12.7 (C-25), 12.6 (C-26).

**Compound 10.** (4E,6Z,8S,9S,10E,12S,13R,14S,16R)-13-hydroxy-8,14-dimethoxy-4,10,12,16-tetramethyl-19-((4-methylbenzyl)amino)-3,20,22-trioxo-2-azabicyclo[16.3.1]docosa-1(21),4,6,10,18-pentaen-9-yl carbamate (212 mg, yield 91 %), mp 237-238 °C, HPLC (OD-H, water/acetonitrile = 35/65, flow rate = 0.5 mL/min, l = 260 nm) tR = 12.065 min (major). Anal. Calcd for C<sub>36</sub>H<sub>47</sub>N<sub>3</sub>O<sub>8</sub>: C, 66.54; H, 7.29; N, 6.47. Found: C, 66.53; H, 7.28; N, 6.49. HRMS (MALDI-TOF) m/z: [M + H]<sup>+</sup> Calcd for C<sub>36</sub>H<sub>47</sub>N<sub>3</sub>O<sub>8</sub>; Found 649.3547. FT-IR (KBr): ν<sub>s</sub>(N-H)<sub>carbamate</sub>=3439.88 cm<sup>-1</sup>, ν<sub>s</sub>(N-H)<sub>lactam</sub>=3329.23 cm<sup>-1</sup>, ν(O-H)=3202.94 cm<sup>-1</sup>, ν<sub>as</sub>(C-H)=2929.66 cm<sup>-1</sup>, ν<sub>s</sub>(C-H)=2879.68 cm<sup>-1</sup>, ν(C=O)<sub>carbamate</sub>=1732.22 cm<sup>-1</sup>, ν(C=O)<sub>lactam</sub>=1691.26 cm<sup>-1</sup>, ν(C=O)<sub>quinone</sub>=1649.34 cm<sup>-1</sup>, ν(C=C)=1613.55 cm<sup>-1</sup>, δ(N-H)<sub>lactam,substituent</sub>=1587.22 cm<sup>-1</sup>, δ(N-H)<sub>carbamate</sub>=1487.98 cm<sup>-1</sup>, ν(C-N)<sub>carbamate</sub>=1322.54 cm<sup>-1</sup>, ν(C-O-C)<sub>carbamate</sub>=1190.51 cm<sup>-1</sup>, ν(C-O-C)<sub>methoxy</sub>=1056.16 cm<sup>-1</sup>, γ(C-H)<sub>ar</sub>=783.97 cm<sup>-1</sup>, γ(N-H)<sub>carbamate</sub>=729.88 cm<sup>-1</sup>. <sup>1</sup>H NMR (600 MHz, CDCl<sub>3</sub>) δ 9.17 (s, 1H, NH-1), 7.29 (s, 1H, H-19), 7.21 – 7.17 (d,  $J^3_{H-31,35,H-32,34}=8.2$  Hz, 2H, H-32,34), 7.15 (d,  $J^3_{H-31,35,H-32,34}=8.2$  Hz, 2H, H-31,35), 6.95 (d,  $J^3_{H-3,H-4}=11.6$  Hz, 1H, H-3), 6.58 (td,  $J^3_{H-3,H-4}=11.6$  Hz,  $J^4_{H-4,H-22}=1.1$  Hz, 1H, H-4), 6.43 (t,  $J^3_{NH-17,H-29}=5.5$  Hz, 1H, NH-17), 5.89 (d,  $J^3_{H-9,H-10}=9.6$  Hz, 1H, H-9), 5.86 (t,  $J^3_{H-5,H-6}=10.5$  Hz, 1H, H-5), 5.18 (s, 1H, H-7), 4.90 (bs, 2H, NH<sub>2</sub>-24), 4.71 (dd,  $J^2=14.4$  Hz,  $J^3_{NH-17,H-29}=5.7$  Hz, 1H, H-29), 4.56 (dd,  $J^2=14.4$  Hz,  $J^3_{NH-17,H-29}=5.4$  Hz, 1H, H-29), 4.31 (dt,  $J^3_{H-6,H-7}=9.9$  Hz,  $J^3_{H-4,H-6}=1.1$  Hz, 1H, H-6), 4.23 (s, 1H, OH-11), 3.58 (d,  $J^3_{H-11,H-12}=9.0$  Hz, 1H, H-11), 3.44 (dt,  $J^3_{H-11,H-12}=9.0$  Hz,  $J^3_{H-12,H-13}=2.9$  Hz, 1H, H-12), 3.36 (s, 3H, H-27), 3.27 (s, 3H, H-23), 2.74 (dq,  $J^3_{H-9,H-10}=9.2$  Hz,  $J^3_{H-10,H-26}=6.9$  Hz,  $J^4_{H-10,H-25}=2.0$  Hz, 1H, H-10), 2.68 – 2.64 (m, 1H, H-15), 2.46 (dd,  $J^2=14.2$  Hz,  $J^3_{H-14,H-15}=10.5$  Hz, 1H, H-15), 2.36 (s, 3H, H-36), 2.02 (d,  $J^4_{H-4,H-22}=1.4$  Hz, 3H, H-22), 1.80 (d,  $J^4_{H-10,H-25}=1.3$  Hz, 3H, H-25), 1.77 (d,  $J^3_{H-12,H-13}=3.2$  Hz, 2H, H-13), 1.76 – 1.71 (m, 1H, H-14), 1.03 (d,  $J^3_{H-10,H-26}=6.5$  Hz, 3H, H-26), 0.99 (d,  $J^3_{H-14,H-28}=6.9$  Hz, 3H, H-28). <sup>13</sup>C{<sup>1</sup>H} NMR (151 MHz, CDCl<sub>3</sub>) δ 183.9 (C-18), 181.1 (C-21), 168.5 (C-1), 156.3 (C-24), 144.8 (C-17), 141.4 (C-20), 138.4 (C-33), 136.0 (C-5), 135.1 (C-2), 133.9 (C-30), 133.7 (C-9), 132.9 (C-8), 130.0\* (C-32,34), 127.9\* (C-31,35), 127.1 (C-3), 126.7 (C-4), 109.0\* (C-16,19), 81.8 (C-7), 81.6 (C-12), 81.4 (C-6), 72.8 (C-11), 57.2 (C-23), 56.9 (C-27), 50.1 (C-29), 35.2 (C-13), 34.6 (C-15), 32.5 (C-10), 28.6 (C-14), 23.1 (C-28), 21.3 (C-36), 12.9 (C-22), 12.7 (C-25), 12.5 (C-26). dq - Doublet of Quartet of Doublets; bs - broad singlet

**Compound 11.** (4E,6Z,8S,9S,10E,12S,13R,14S,16R)-13-hydroxy-8,14-dimethoxy-19-((4-methoxybenzyl)amino)-4,10,12,16-tetramethyl-3,20,22-trioxo-2-azabicyclo[16.3.1]docosa-1(21),4,6,10,18-pentaen-9-yl carbamate (179 mg, yield 75 %), mp 215-217 °C, HPLC (OD-H, water/acetonitrile = 35/65, flow rate = 0.5 mL/min, l = 260 nm) tR = 8.924 min (major). Anal. Calcd for C<sub>36</sub>H<sub>47</sub>N<sub>3</sub>O<sub>9</sub>: C, 64.95; H, 7.12; N, 6.31. Found: C, 64.94; H, 7.10; N, 6.32. HRMS (MALDI-TOF) m/z: [M + H]<sup>+</sup> Calcd for C<sub>36</sub>H<sub>47</sub>N<sub>3</sub>O<sub>9</sub>; Found 665.7111. FT-IR (KBr): ν<sub>as</sub>(N-H)<sub>carbamate</sub>=3483.95 cm<sup>-1</sup>, ν<sub>s</sub>(N-H)<sub>carbamate</sub>=3429.37 cm<sup>-1</sup>, ν<sub>s</sub>(N-H)<sub>lactam</sub>=3333.68 cm<sup>-1</sup>, ν(O-H)=3194.51 cm<sup>-1</sup>, ν<sub>as</sub>(C-H)=2934.14 cm<sup>-1</sup>, ν<sub>s</sub>(C-H)=2861.45 cm<sup>-1</sup>, ν(C=O)<sub>carbamate</sub>=1734.45 cm<sup>-1</sup>, ν(C=O)<sub>lactam</sub>=1701.58 cm<sup>-1</sup>, ν(C=O)<sub>quinone</sub>=1647.98 cm<sup>-1</sup>, ν(C=C)=1617.59 cm<sup>-1</sup>, δ(N-H)=1499.84 cm<sup>-1</sup>, ν(C-N)<sub>carbamate</sub>=1329.29 cm<sup>-1</sup>, ν(C-O-C)<sub>carbamate</sub>=1174.22 cm<sup>-1</sup>, ν(C-O-C)<sub>methoxy</sub>=1055.38 cm<sup>-1</sup>, γ(C-H)<sub>ar</sub>=789.80 cm<sup>-1</sup>, γ(N-H)<sub>carbamate</sub>=712.90 cm<sup>-1</sup>. <sup>1</sup>H NMR (600 MHz, CDCl<sub>3</sub>) δ 9.17 (s, 1H, NH-1), 7.29 (s, 1H, H-19), 7.21 – 7.18 (m, 2H, H-31,35), 6.96 (d,  $J^3_{H-3,H-4}=11.7$  Hz, 1H, H-3), 6.92 – 6.89 (m, 2H, H-32,34), 6.58 (td,  $J^3_{H-3,H-4}=11.3$  Hz,  $J^4_{H-4,H-22}=1.1$  Hz, 1H, H-4), 6.37 (t,  $J^3_{NH-17,H-29}=5.5$  Hz, 1H, NH-17), 5.90 (d,  $J^3_{H-9,H-10}=9.6$  Hz, 1H, H-9), 5.86 (t,  $J^3_{H-5,H-6}=10.5$  Hz, 1H, H-5), 5.19 (s, 1H, H-7), 4.83 (bs, 2H, NH<sub>2</sub>-24), 4.72 – 4.67 (m, 1H, H-29), 4.53 (dd,  $J^2=14.2$  Hz,  $J^3_{NH-17,H-29}=5.3$  Hz, 1H, H-29), 4.31 (dt,  $J^3_{H-6,H-7}=9.9$  Hz,  $J^3_{H-4,H-6}=1.2$  Hz, 1H, H-6), 4.24 (s, 1H, OH-11), 3.82 (s, 3H, H-36), 3.58 (ddd,  $J^3_{H-11,H-12}=9.0$  Hz,  $J^3_{H-10,H-11}=6.5$  Hz,  $J^4_{H-11,H-13}=2.2$  Hz, 1H, H-11), 3.45 (dt,  $J^3_{H-11,H-12}=9.0$  Hz,  $J^3_{H-12,H-13}=2.9$  Hz, 1H, H-12), 3.37 (s, 3H, H-27), 3.27 (s, 3H, H-23), 2.78 – 2.72 (m, 1H, H-10), 2.70 – 2.65 (m, 1H, H-15), 2.47 (dd,  $J^2=14.2$  Hz,  $J^3_{H-14,H-15}=10.6$  Hz, 1H, H-15), 2.02 (d,  $J^4_{H-4,H-22}=1.3$  Hz, 3H, H-22), 1.80 (d,  $J^4_{H-10,H-25}=1.3$  Hz, 3H, H-25), 1.78 (d,  $J^3_{H-12,H-13}=3.2$  Hz, 2H, H-13), 1.76 – 1.73 (m, 1H, H-14), 1.03 (d,  $J^3_{H-10,H-26}=6.5$  Hz, 3H, H-26), 1.00 (d,  $J^3_{H-14,H-28}=6.9$  Hz, 3H, H-28). bs - broad singlet

<sup>13</sup>C{<sup>1</sup>H} NMR (151 MHz, CDCl<sub>3</sub>) δ 183.9 (C-18), 181.1 (C-21), 168.5 (C-1), 159.8 (C-33), 156.2 (C-24), 144.8 (C-17), 141.4 (C-20), 136.0 (C-5), 135.1 (C-2), 133.9 (C-9), 132.9 (C-8), 129.4\* (C-31,35), 128.7 (C-30), 127.1 (C-3), 126.7 (C-4), 114.7\* (C-32,34), 109.0 (C-19), 108.9 (C-19), 81.8 (C-7), 81.6 (C-12), 81.4 (C-6), 72.8 (C-

11), 57.3 (C-23), 56.9 (C-27), 55.5 (C-36), 49.9 (C-29), 35.2 (C-13), 34.7 (C-15), 32.5 (C-10), 28.7 (C-14), 23.1 (C-28), 12.9 (C-22), 12.8 (C-25), 12.5 (C-26).

**Compound 12.** (4E,6Z,8S,9S,10E,12S,13R,14S,16R)-19-((4-(dimethylamino)benzyl)amino)-13-hydroxy-8,14-dimethoxy-4,10,12,16-tetramethyl-3,20,22-trioxo-2-azabicyclo[16.3.1]docosa-1(21),4,6,10,18-pentaen-9-yl carbamate (215 mg, yield 89 %), mp 207-209 °C, HPLC (OD-H, water/acetonitrile = 35/65, flow rate = 0.5 mL/min, l = 260 nm) tR = 11.915 min (major). Anal. Calcd for C<sub>37</sub>H<sub>50</sub>N<sub>4</sub>O<sub>8</sub>: C, 65.47; H, 7.42; N, 8.25. Found: C, 65.48; H, 7.41; N, 8.24. HRMS (MALDI-TOF) m/z: [M + H]<sup>+</sup> Calcd for C<sub>37</sub>H<sub>50</sub>N<sub>4</sub>O<sub>8</sub> 678.3629; Found 678.3791. FT-IR (KBr): ν<sub>as</sub>(N-H)<sub>carbamate</sub>=3476.98 cm<sup>-1</sup>, ν<sub>s</sub>(N-H)<sub>carbamate</sub>=3438.03 cm<sup>-1</sup>, ν<sub>s</sub>(N-H)<sub>lactam</sub>=3333.73 cm<sup>-1</sup>, ν(O-H)=3206.48 cm<sup>-1</sup>, ν<sub>as</sub>(C-H)=2933.02 cm<sup>-1</sup>, ν<sub>s</sub>(C-H)=2824.65 cm<sup>-1</sup>, ν(C=O)<sub>carbamate</sub>=1738.23 cm<sup>-1</sup>, ν(C=O)<sub>lactam</sub>=1696.10 cm<sup>-1</sup>, ν(C=O)<sub>quinone</sub>=1651.30 cm<sup>-1</sup>, ν(C=C)=1615.34 cm<sup>-1</sup>, δ(N-H)<sub>lactam,substituent</sub>=1558.71 cm<sup>-1</sup>, δ(N-H)<sub>carbamate</sub>=1487.16 cm<sup>-1</sup>, ν(C-N)<sub>carbamate</sub>=1324.21 cm<sup>-1</sup>, ν(C-O-C)<sub>carbamate</sub>=1193.03 cm<sup>-1</sup>, ν(C-O-C)=1107.35 cm<sup>-1</sup>, ν(C-O-C)<sub>methoxy</sub>=1056.87 cm<sup>-1</sup>, γ(=C-H)<sub>ar</sub>=781.36 cm<sup>-1</sup>, γ(N-H)<sub>carbamate</sub>=695.36 cm<sup>-1</sup>. <sup>1</sup>H NMR (600 MHz, CDCl<sub>3</sub>) δ 9.19 (s, 1H, NH-1), 7.28 (s, 1H, H-19), 7.15 – 7.12 (m, 2H, H-31,35), 6.96 (d, J<sup>3</sup><sub>H-3,H-4</sub>= 11.7 Hz, 1H, H-3), 6.73 – 6.69 (m, 2H, H-32,34), 6.58 (ddd, J<sup>3</sup><sub>H-3,H-4</sub>= 11.8 Hz, J<sup>3</sup><sub>H-4,H-5</sub>= 11.1 Hz, J<sup>4</sup><sub>H-4,H-22</sub>= 1.0 Hz, 1H, H-4), 6.38 – 6.34 (m, 1H, NH-17), 5.92 (d, J<sup>3</sup><sub>H-9,H-10</sub>= 9.5 Hz, 1H, H-9), 5.88 – 5.84 (m, 1H, H-5), 5.19 (s, 1H, H-7), 4.84 (bs, 2H, NH<sub>2</sub>-24), 4.66 (dd, J<sup>2</sup>= 14.1 Hz, J<sup>3</sup><sub>NH-17,H-29</sub>= 5.4 Hz, 1H, H-29), 4.48 (dd, J<sup>2</sup>= 14.1 Hz, J<sup>3</sup><sub>NH-17,H-29</sub>= 5.2 Hz, 1H, H-29), 4.35 (bs, 1H, 11-OH), 4.31 (dt, J<sup>3</sup><sub>H-6,H-7</sub>=9.9 Hz, J<sup>3</sup><sub>H-4,H-6</sub>= 1.2 Hz, 1H, H-6), 3.61 – 3.55 (m, 1H, H-11), 3.46 (dt, J<sup>3</sup><sub>H-11,H-12</sub>= 9.0 Hz, J<sup>3</sup><sub>H-12,H-13</sub>= 2.9 Hz, 1H, H-12), 3.37 (s, 3H, H-27), 3.27 (s, 3H, H-23), 2.96 (s, 6H, H-36,37), 2.75 (dq, J<sup>3</sup><sub>H-9,H-10</sub>= 9.1 Hz, J<sup>3</sup><sub>H-10,H-26</sub>= 6.8 Hz, J<sup>4</sup><sub>H-10,H-25</sub>= 2.1 Hz, 1H, H-10), 2.71 – 2.67 (m, 1H, H-15), 2.52 (dd, J<sup>2</sup>= 14.2 Hz, J<sup>3</sup><sub>H-14,H-15</sub>= 10.6 Hz, 1H, H-15), 2.03 (d, J<sup>4</sup><sub>H-4,H-22</sub>= 0.8 Hz, 3H, H-22), 1.80 (d, J<sup>4</sup><sub>H-10,H-25</sub>= 1.4 Hz, 3H, H-25), 1.79 (bs, 1H, H-14), 1.66 (s, 2H, H-13), 1.05 (d, J<sup>3</sup><sub>H-10,H-26</sub>= 6.6 Hz, 3H, H-26), 1.00 (d, J<sup>3</sup><sub>H-14,H-28</sub>= 6.9 Hz, 3H, H-28). dqd - Doublet of Quartet of Doublets; bs - broad singlet <sup>13</sup>C{<sup>1</sup>H} NMR (151 MHz, CDCl<sub>3</sub>) δ 184.0 (C-18), 180.9 (C-21), 168.5 (C-1), 156.2 (C-24), 150.7 (C-33) 144.9 (C-17), 141.5 (C-20), 135.9 (C-5), 135.2 (C-2), 134.0 (C-9), 132.9 (C-8), 129.2\* (C-31,35), 127.0 (C-3), 126.7 (C-4), 124.0 (C-30), 112.9\* (C-32,34), 108.9 (C-19), 108.7 (C-16), 81.8 (C-7), 81.7 (C-12), 81.4 (C-6), 72.8 (C-11), 57.3 (C-23), 56.9 (C-27), 50.2 (C-29), 40.6\* (C-36,37), 35.2 (C-13), 34.8 (C-15), 32.5 (C-10), 28.6 (C-14), 23.1 (C-28), 12.9 (C-22), 12.7 (C-25), 12.5 (C-26).

Spectral characteristic of a GDM analogs **1a-16a**:

**Compound 1a.** (4E,6Z,8S,9S,10E,12S,13R,14S,16R)-1<sup>5</sup>,13-dihydroxy-8,14-dimethoxy-4,10,12,16-tetramethyl-3-oxo-1<sup>2</sup>-phenyl-2-aza-1(6,4) benzo[d]oxazolacycloheptadecaphane-4,6,10-trien-9-yl carbamate (72mg, yield 72 %), mp 235-237 °C, HPLC (OD-H, water/acetonitrile = 35/65, flow rate = 1.0 mL/min, l = 260 nm) tR = 3.912 min (major). Anal. Calcd for C<sub>35</sub>H<sub>43</sub>N<sub>3</sub>O<sub>8</sub>: C, 66.33 H,6.84; N, 6.63. Found: C, 66.35; H,6.83; N, 6.66. HRMS (MALDI-TOF) m/z: [M + H]<sup>+</sup> Calcd for C<sub>35</sub>H<sub>43</sub>N<sub>3</sub>O<sub>8</sub> 633.3050; Found 633.1470. FT-IR (KBr): ν<sub>as</sub>(N-H)<sub>carbamate</sub>=3440.19 cm<sup>-1</sup>, ν<sub>s</sub>(N-H)<sub>carbamate</sub>=3392.27 cm<sup>-1</sup>, ν<sub>s</sub>(N-H)<sub>lactam</sub>=3337.99 cm<sup>-1</sup>, ν(O-H)<sub>phenol</sub>=3290.94 cm<sup>-1</sup>, ν(O-H)=3185.63 cm<sup>-1</sup>, ν<sub>as</sub>(C-H)=2927.33 cm<sup>-1</sup>, ν<sub>s</sub>(C-H)=2875.63 cm<sup>-1</sup>, ν(C=O)<sub>carbamate</sub>=1733.39 cm<sup>-1</sup>, ν(C=O)<sub>lactam</sub>=1699.86 cm<sup>-1</sup>, ν(C=N)=1656.84 cm<sup>-1</sup>, ν(C=C)=1615.53 cm<sup>-1</sup>, δ(N-H)=1531.81 cm<sup>-1</sup>, δ(N-H)<sub>carbamate</sub>=1480.18 cm<sup>-1</sup>, ν(C-N)<sub>carbamate</sub>=1379.11 cm<sup>-1</sup>, ν(C-O-C)<sub>carbamate</sub>=1174.70 cm<sup>-1</sup>, ν(C-O-C)=1108.58 cm<sup>-1</sup>, ν(C-O-C)<sub>methoxy</sub>=1061.44 cm<sup>-1</sup>, γ(=C-H)<sub>ar</sub>=779.78 cm<sup>-1</sup>, γ(N-H)<sub>carbamate</sub>=695.28 cm<sup>-1</sup>. <sup>1</sup>H NMR (500 MHz, DMSO-d<sub>6</sub>+ACN-d<sub>3</sub>) δ 9.54 (s, 1H, NH-1), 8.60 (s, 1H, OH-21), 8.19 – 8.14 (m, 2H, H-31,35), 7.96 (s, 1H, H-33), 7.67 – 7.60 (m, 2H, H-32,34), 7.34 (s, 1H, H-19), 6.51 – 6.44 (m, 1H, NH<sub>2</sub>-24), 6.37 – 6.28 (m, 2H, NH<sub>2</sub>-24, H-4), 6.03 (d, J<sup>3</sup><sub>H-3,H-4</sub>= 11.6 Hz, 1H, H-3), 5.01 – 4.88 (m, 2H, H-5,9), 4.69 (d, J<sup>3</sup><sub>H-6,H-7</sub>= 9.5 Hz, 1H, H-7), 4.33 – 4.28 (m, 1H, OH-11), 3.75 (t, J<sup>3</sup><sub>H-6,H-7</sub>= 10.1 Hz, 1H, H-6), 3.49 – 3.43 (m, 1H, H-11), 3.28 (d, J<sup>2</sup>= 12.1 Hz, 1H, H-15), 3.21 (s, 3H, H-27), 3.12 (d, J<sup>2</sup>= 11.6 Hz, 1H, H-15), 2.97 (s, 3H, H-23), 2.71 – 2.65 (m, 1H, H-12), 2.24 (bs, 1H, H-14), 1.98 (s, 3H, H-22), 1.88 – 1.78 (m, 1H, H-10), 1.76 – 1.71 (m, 1H, H-13), 0.74 (d, J<sup>3</sup><sub>H-14,H-28</sub>= 6.6 Hz, 3H, H-28), 0.64 (d, J<sup>3</sup><sub>H-10,H-26</sub>= 6.3 Hz, 3H, H-26), 0.52 (t, J<sup>2</sup>= 12.7 Hz, 1H, H-13), 0.32 (s, 3H, H-25). bs - broad singlet <sup>13</sup>C{<sup>1</sup>H} NMR (126 MHz, DMSO-d<sub>6</sub>+ ACN-d<sub>3</sub>) δ 174.2 (C-1), 162.3 (C-29), 156.5 (C-24), 148.1 (C-21), 144.4 (C-18), 140.8 (C-17), 135.9 (C-2), 133.9 (C-9), 132.0 (C-30), 130.0 (C-4), 129.8\* (C-32,34), 129.2 (C-8), 127.6\* (C-20,31,35), 127.5 (C-33), 127.4 (C-5), 123.5 (C-3), 119.2 (C-16), 105.0 (C-19), 80.4 (C-7), 79.9 (C-12), 74.5 (C-6), 71.3 (C-11), 55.9 (C-27), 55.3 (C-23), 35.0 (C-10), 31.6 (C-15), 31.2 (C-13), 30.5 (C-14), 18.8 (C-26), 16.7 (C-28), 14.1 (C-22), 9.8 (C-25). (\*-overlapped)

**Compound 2a.** (4E,6Z,8S,9S,10E,12S,13R,14S,16R)-1<sup>2</sup>-(4-fluorophenyl)-1<sup>5</sup>,13-dihydroxy-8,14-dimethoxy-4,10,12,16-tetramethyl-3-oxo-2-aza-1(6,4)-benzo[d]oxazolacycloheptadecaphane-4,6,10-trien-9-yl carbamate (74 mg, yield 74 %), mp 249-254 °C, HPLC (OD-H, water/acetonitrile = 35/65, flow rate = 1.0 mL/min, l = 260 nm) tR = 4.065 min (major). Anal. Calcd for C<sub>35</sub>H<sub>42</sub>FN<sub>3</sub>O<sub>8</sub>: C, 64.50; H, 6.50; F, 2.92; N, 6.45. Found: C, 64.51; H, 6.52; F, 2.93; N, 6.46. HRMS (MALDI-TOF) m/z: [M + H]<sup>+</sup> Calcd for C<sub>35</sub>H<sub>42</sub>FN<sub>3</sub>O<sub>8</sub> 651.2956; Found 651.2654.

FT-IR (KBr):  $\nu_{\text{as}}(\text{N-H})_{\text{carbamate}} = 3436.49 \text{ cm}^{-1}$ ,  $\nu_{\text{s}}(\text{N-H})_{\text{carbamate}} = 3391.46 \text{ cm}^{-1}$ ,  $\nu_{\text{s}}(\text{N-H})_{\text{lactam}} = 3332.08 \text{ cm}^{-1}$ ,  $\nu(\text{O-H})_{\text{phenol}} = 3297.02 \text{ cm}^{-1}$ ,  $\nu(\text{O-H}) = 3183.48 \text{ cm}^{-1}$ ,  $\nu_{\text{as}}(\text{C-H}) = 2926.83 \text{ cm}^{-1}$ ,  $\nu_{\text{s}}(\text{C-H}) = 2825.05 \text{ cm}^{-1}$ ,  $\nu(\text{C=O})_{\text{carbamate}} = 1733.35 \text{ cm}^{-1}$ ,  $\nu(\text{C=O})_{\text{lactam}} = 1699.44 \text{ cm}^{-1}$ ,  $\nu(\text{C=N}) = 1647.18 \text{ cm}^{-1}$ ,  $\nu(\text{C=C}) = 1614.52 \text{ cm}^{-1}$ ,  $\delta(\text{N-H}) = 1533.62 \text{ cm}^{-1}$ ,  $\nu(\text{C-F}) = 1499.19 \text{ cm}^{-1}$ ,  $\delta(\text{N-H})_{\text{carbamate}} = 1478.96 \text{ cm}^{-1}$ ,  $\nu(\text{C-N})_{\text{carbamate}} = 1379.07 \text{ cm}^{-1}$ ,  $\nu(\text{C-O-C})_{\text{carbamate}} = 1177.85 \text{ cm}^{-1}$ ,  $\nu(\text{C-O-C}) = 1106.75 \text{ cm}^{-1}$ ,  $\nu(\text{C-O-C})_{\text{methoxy}} = 1061.80 \text{ cm}^{-1}$ ,  $\gamma(\text{C-H})_{\text{ar}} = 785.14 \text{ cm}^{-1}$ ,  $\gamma(\text{N-H})_{\text{carbamate}} = 681.40 \text{ cm}^{-1}$ .  $^1\text{H NMR}$  (500 MHz,  $\text{DMSO-}d_6 + \text{ACN-}d_3$ )  $\delta$  9.45 (s, 1H, NH-1), 8.53 (s, 1H, OH-21), 8.24 – 8.15 (m, 2H, H-31,35), 7.45 – 7.40 (m, 2H, H-32,34), 7.30 (s, 1H, H-19), 6.39 (s, 1H, NH<sub>2</sub>-24), 6.30 (t,  $J^3_{\text{H-3,H-4}} = 11.5 \text{ Hz}$ , 1H, H-4), 6.22 (s, 1H, NH<sub>2</sub>-24), 6.00 (d,  $J^3_{\text{H-3,H-4}} = 11.2 \text{ Hz}$ , 1H, H-3), 4.95 – 4.87 (m, 2H, H-5,9), 4.67 (d,  $J^3_{\text{H-6,H-7}} = 9.6 \text{ Hz}$ , 1H, H-7), 4.19 (s, 1H, OH-11), 3.73 (t,  $J^3_{\text{H-6,H-7}} = 10.3 \text{ Hz}$ , 1H, H-6), 3.29 – 3.23 (m, 1H, H-11), 3.19 (s, 3H, H-27), 3.12 – 3.06 (m, 1H, H-15), 2.95 (s, 3H, H-23), 2.89 (s, 1H, H-15), 2.71 – 2.63 (m, 1H, H-12), 2.29 – 2.20 (m, 1H, H-14), 1.96 (s, 3H, H-22), 1.73 – 1.68 (m, 2H, H-10,13), 0.72 (d,  $J^3_{\text{H-14,H-28}} = 6.6 \text{ Hz}$ , 3H, H-28), 0.63 (d,  $J^3_{\text{H-10,H-26}} = 6.3 \text{ Hz}$ , 3H, H-26), 0.54 – 0.45 (m, 1H, H-13), 0.32 (s, 3H, H-25).  $^{13}\text{C}\{^1\text{H}\}$  NMR (126 MHz,  $\text{DMSO-}d_6 + \text{ACN-}d_3$ )  $\delta$  174.0 (C-1), 164.6 (d,  $J^1 = 249.9 \text{ Hz}$ , C-33), 161.4 (C-29), 156.4 (C-24), 148.0 (C-21), 144.3 (C-18), 140.6 (C-17), 135.8 (C-2), 133.8 (C-9), 129.8 (C-4), 129.7\* (d,  $J^2 = 8.4 \text{ Hz}$ , C-31,35), 129.1 (C-8), 127.6 (C-30), 127.0 (C-5), 124.1 (C-20), 123.4 (C-3), 119.2 (C-16), 116.9\* (d,  $J^2 = 22.2 \text{ Hz}$ , C-32,34), 104.8 (C-19), 80.4 (C-7), 79.8 (C-12), 74.5 (C-6), 71.4 (C-11), 55.8 (C-27), 55.3 (C-23), 34.9 (C-10), 31.6 (C-15), 31.2 (C-13), 30.4 (C-14), 18.6 (C-26), 16.7 (C-28), 14.0 (C-22), 9.8 (C-25). (\*-overlapped)

**Compound 3a.** (4E,6Z,8S,9S,10E,12S,13R,14S,16R)-1<sup>2</sup>-(4-chlorophenyl)-1<sup>5</sup>,13-dihydroxy-8,14-dimethoxy-4,10,12,16-tetramethyl-3-oxo-2-aza-1(6,4)-benzo[d]oxazolacycloheptadecaphane-4,6,10-trien-9-yl carbamate (68 mg, yield 68 %), mp 229-230 °C, HPLC (OD-H, water/acetonitrile = 35/65, flow rate = 1.0 mL/min, l = 260 nm) tR = 5.345 min (major). Anal. Calcd for C<sub>35</sub>H<sub>42</sub>ClN<sub>3</sub>O<sub>8</sub>: C, 62.91; H, 6.34; Cl, 5.31; N, 6.29. Found: C, 62.90; H, 6.33; Cl, 5.32; N, 6.31. HRMS (MALDI-TOF) m/z: [M + H]<sup>+</sup> Calcd for C<sub>35</sub>H<sub>42</sub>ClN<sub>3</sub>O<sub>8</sub> 667.2660; Found 667.4203. FT-IR (KBr):  $\nu_{\text{as}}(\text{N-H})_{\text{carbamate}} = 3437.25 \text{ cm}^{-1}$ ,  $\nu_{\text{s}}(\text{N-H})_{\text{carbamate}} = 3391.19 \text{ cm}^{-1}$ ,  $\nu_{\text{s}}(\text{N-H})_{\text{lactam}} = 3332.09 \text{ cm}^{-1}$ ,  $\nu(\text{O-H})_{\text{phenol}} = 3301.07 \text{ cm}^{-1}$ ,  $\nu(\text{O-H}) = 3181.64 \text{ cm}^{-1}$ ,  $\nu_{\text{as}}(\text{C-H}) = 2923.19 \text{ cm}^{-1}$ ,  $\nu_{\text{s}}(\text{C-H}) = 2850.57 \text{ cm}^{-1}$ ,  $\nu(\text{C=O})_{\text{carbamate}} = 1732.71 \text{ cm}^{-1}$ ,  $\nu(\text{C=O})_{\text{lactam}} = 1698.50 \text{ cm}^{-1}$ ,  $\nu(\text{C=N}) = 1646.47 \text{ cm}^{-1}$ ,  $\nu(\text{C=C}) = 1614.55 \text{ cm}^{-1}$ ,  $\delta(\text{N-H}) = 1535.29 \text{ cm}^{-1}$ ,  $\delta(\text{N-H})_{\text{carbamate}} = 1483.43 \text{ cm}^{-1}$ ,  $\nu(\text{C-N})_{\text{carbamate}} = 1378.90 \text{ cm}^{-1}$ ,  $\nu(\text{C-O-C})_{\text{carbamate}} = 1178.01 \text{ cm}^{-1}$ ,  $\nu(\text{C-O-C}) = 1104.94 \text{ cm}^{-1}$ ,  $\nu(\text{C-O-C})_{\text{methoxy}} = 1062.06 \text{ cm}^{-1}$ ,  $\gamma(\text{C-H})_{\text{ar}} = 785.97 \text{ cm}^{-1}$ ,  $\gamma(\text{N-H})_{\text{carbamate}} = 680.09 \text{ cm}^{-1}$ .  $^1\text{H NMR}$  (500 MHz,  $\text{DMSO-}d_6 + \text{ACN-}d_3$ )  $\delta$  9.47 (s, 1H, NH-1), 8.59 (s, 1H, OH-21), 8.12 (d,  $J^3_{\text{H-31,35,H-32,34}} = 7.9 \text{ Hz}$ , 2H, H-31,35), 7.66 (d,  $J^3_{\text{H-31,35,H-32,34}} = 8.9 \text{ Hz}$ , 2H, H-32,34), 7.31 (s, 1H, H-19), 6.39 (s, 1H, NH<sub>2</sub>-24), 6.30 (t,  $J^3_{\text{H-3,H-4}} = 11.4 \text{ Hz}$ , 1H, H-4), 6.22 (s, 1H, NH<sub>2</sub>-24), 6.00 (d,  $J^3_{\text{H-3,H-4}} = 11.6 \text{ Hz}$ , 1H, H-3), 4.94 (d,  $J^3_{\text{H-9,H-10}} = 10.7 \text{ Hz}$ , 1H, H-9), 4.90 (d,  $J^3_{\text{H-5,H-6}} = 10.7 \text{ Hz}$ , 1H, H-5), 4.67 (d,  $J^3_{\text{H-6,H-7}} = 9.6 \text{ Hz}$ , 1H, H-7), 4.20 (s, 1H, OH-11), 3.73 (t,  $J^3_{\text{H-6,H-7}} = 10.2 \text{ Hz}$ , 1H, H-6), 3.52 (s, 1H, H-11), 3.28 – 3.25 (m, 1H, H-15), 3.19 (s, 3H, H-27), 3.14 – 3.06 (m, 1H, H-15), 2.95 (s, 3H, H-23), 2.70 – 2.62 (m, 1H, H-12), 2.32 – 2.25 (m, 1H, H-14), 1.96 (s, 3H, H-22), 1.82 – 1.72 (m, 2H, H-10,13), 0.73 (d,  $J^3_{\text{H-14,H-28}} = 6.5 \text{ Hz}$ , 3H, H-28), 0.63 (d,  $J^3_{\text{H-10,H-26}} = 6.4 \text{ Hz}$ , 3H, H-26), 0.54 – 0.45 (m, 1H, H-13), 0.31 (s, 3H, H-25).  $^{13}\text{C}\{^1\text{H}\}$  NMR (126 MHz,  $\text{DMSO-}d_6 + \text{ACN-}d_3$ )  $\delta$  174.0 (C-1), 161.2 (C-29), 156.4 (C-24), 148.1 (C-21), 144.4 (C-18), 140.6 (C-17), 135.8 (C-2), 133.8\* (C-9,33), 130.1 (C-4), 129.9 (C-31), 129.8 (C-35), 129.1 (C-8), 128.8\* (C-32,34), 127.9 (C-30), 127.6 (C-20), 126.3 (C-5), 123.4 (C-3), 119.3 (C-16), 104.8 (C-19), 80.4 (C-7), 79.7 (C-12), 74.4 (C-6), 71.5 (C-11), 55.8 (C-27), 55.3 (C-23), 34.9 (C-10), 32.0 (C-15), 31.5 (C-13), 30.4 (C-14), 18.7 (C-26), 16.8 (C-28), 14.2 (C-22), 9.7 (C-25). (\*-overlapped)

**Compound 4a.** (4E,6Z,8S,9S,10E,12S,13R,14S,16R)-1<sup>2</sup>-(4-bromophenyl)-1<sup>5</sup>,13-dihydroxy-8,14-dimethoxy-4,10,12,16-tetramethyl-3-oxo-2-aza-1(6,4)-benzo[d]oxazolacycloheptadecaphane-4,6,10-trien-9-yl carbamate (72 mg, yield 72 %), mp 248-250 °C, HPLC (OD-H, water/acetonitrile = 35/65, flow rate = 1.0 mL/min, l = 260 nm) tR = 5.752 min (major). Anal. Calcd for C<sub>35</sub>H<sub>42</sub>BrN<sub>3</sub>O<sub>8</sub>: C, 58.99; H, 5.94; Br, 11.21; N, 5.90. Found: C, 59.01; H, 5.93; Br, 11.20; N, 5.93. HRMS (MALDI-TOF) m/z: [M + H]<sup>+</sup> Calcd for C<sub>35</sub>H<sub>42</sub>BrN<sub>3</sub>O<sub>8</sub> 711.2155; Found 711.3469. FT-IR (KBr):  $\nu_{\text{as}}(\text{N-H})_{\text{carbamate}} = 3436.67 \text{ cm}^{-1}$ ,  $\nu_{\text{s}}(\text{N-H})_{\text{carbamate}} = 3392.17 \text{ cm}^{-1}$ ,  $\nu_{\text{s}}(\text{N-H})_{\text{lactam}} = 3332.47 \text{ cm}^{-1}$ ,  $\nu(\text{O-H})_{\text{phenol}} = 3288.91 \text{ cm}^{-1}$ ,  $\nu(\text{O-H}) = 3181.83 \text{ cm}^{-1}$ ,  $\nu_{\text{as}}(\text{C-H}) = 2924.41 \text{ cm}^{-1}$ ,  $\nu_{\text{s}}(\text{C-H}) = 2851.23 \text{ cm}^{-1}$ ,  $\nu(\text{C=O})_{\text{carbamate}} = 1731.59 \text{ cm}^{-1}$ ,  $\nu(\text{C=O})_{\text{lactam}} = 1698.29 \text{ cm}^{-1}$ ,  $\nu(\text{C=N}) = 1646.92 \text{ cm}^{-1}$ ,  $\nu(\text{C=C}) = 1614.77 \text{ cm}^{-1}$ ,  $\delta(\text{N-H}) = 1533.97 \text{ cm}^{-1}$ ,  $\delta(\text{N-H})_{\text{carbamate}} = 1481.15 \text{ cm}^{-1}$ ,  $\nu(\text{C-N})_{\text{carbamate}} = 1378.11 \text{ cm}^{-1}$ ,  $\nu(\text{C-O-C})_{\text{carbamate}} = 1193.35 \text{ cm}^{-1}$ ,  $\nu(\text{C-O-C}) = 1105.51 \text{ cm}^{-1}$ ,  $\nu(\text{C-O-C})_{\text{methoxy}} = 1069.33 \text{ cm}^{-1}$ ,  $\gamma(\text{C-H})_{\text{ar}} = 785.72 \text{ cm}^{-1}$ ,  $\gamma(\text{N-H})_{\text{carbamate}} = 679.97 \text{ cm}^{-1}$ .  $^1\text{H NMR}$  (500 MHz,  $\text{DMSO-}d_6 + \text{ACN-}d_3$ )  $\delta$  9.46 (s, 1H, NH-1), 8.56 (s, 1H, OH-21), 8.05 (d,  $J^3_{\text{H-31,35,H-32,34}} = 8.4 \text{ Hz}$ , 2H, H-31,35), 7.81 (d,  $J^3_{\text{H-31,35,H-32,34}} = 8.5 \text{ Hz}$ , 2H, H-32,34), 7.31 (s, 1H, H-19), 6.39 (s, 1H, NH<sub>2</sub>-24), 6.30 (t,  $J^3_{\text{H-3,H-4}} = 11.4 \text{ Hz}$ , 1H, H-4), 6.22 (s, 1H, NH<sub>2</sub>-24), 6.00 (d,  $J^3_{\text{H-3,H-4}} = 11.6 \text{ Hz}$ , 1H, H-3), 4.98 – 4.87 (m, 2H, H-5,9), 4.67 (d,  $J^3_{\text{H-6,H-7}} = 9.6 \text{ Hz}$ , 1H, H-7), 4.20 (s, 1H, OH-11), 3.73 (t,  $J^3_{\text{H-6,H-7}} = 10.1 \text{ Hz}$ , 1H, H-6), 3.52 (s, 1H, H-11), 3.19 (s, 3H, H-27), 3.09 (d,  $J^2 = 12.4 \text{ Hz}$ , 1H, H-15), 2.95 (s, 3H, H-23), 2.89 (s, 1H, H-15), 2.70 – 2.64 (m, 1H, H-12), 2.28 – 2.21 (m, 1H, H-14), 1.96 (s, 3H, H-22), 1.80 – 1.73 (m, 1H, H-10), 1.71 – 1.65 (m, 1H, H-13), 0.73 (d,  $J^3_{\text{H-14,H-28}} = 6.5 \text{ Hz}$ , 3H, H-28), 0.63 (d,  $J^3_{\text{H-10,H-26}} = 6.3 \text{ Hz}$ , 3H, H-26), 0.51 (d,  $J^2 = 13.7 \text{ Hz}$ , 1H, H-13), 0.31 (s, 3H, H-25).  $^{13}\text{C}\{^1\text{H}\}$  NMR (126 MHz,  $\text{DMSO-}d_6 + \text{ACN-}d_3$ )  $\delta$  174.0 (C-1), 161.3 (C-29), 156.4 (C-24), 148.1 (C-21), 144.3 (C-18), 140.5 (C-17), 135.7 (C-2), 133.8 (C-9), 132.7 (C-32), 132.6 (C-34), 130.1 (C-4), 129.7

(C-30), 129.1 (C-8), 128.8\* (C-31,35), 127.6 (C-5), 126.5 (C-20), 125.5 (C-33), 123.3 (C-3), 119.2 (C-16), 104.8 (C-19), 80.3 (C-7), 79.8 (C-12), 74.4 (C-6), 71.2 (C-11), 55.8 (C-27), 55.3 (C-23), 34.9 (C-10), 32.0 (C-15), 31.6 (C-13), 30.8 (C-14), 18.7 (C-26), 16.7 (C-28), 14.0 (C-22), 9.7 (C-25). (\*-overlapped)

**Compound 5a.** (4E,6Z,8S,9S,10E,12S,13R,14S,16R)-1<sup>5</sup>,13-dihydroxy-1<sup>2</sup>-(4-iodophenyl)-8,14-dimethoxy-4,10,12,16-tetramethyl-3-oxo-2-aza-1(6,4)-benzo[d]oxazolacycloheptadecaphane-4,6,10-trien-9-yl carbamate (84 mg, 84 %), tt. 248-250 °C, HPLC (OD-H, water/acetonitrile = 35/65, flow rate = 1.0 mL/min, l = 260 nm) tR = 5.778 min (major). Anal. Calcd for C<sub>35</sub>H<sub>42</sub>IN<sub>3</sub>O<sub>8</sub>: C, 55.34; H, 5.57; I, 16.71; N, 5.53. Found: C, 55.31; H, 5.54; I, 16.70; N, 5.54. HRMS (MALDI-TOF) m/z: [M + H]<sup>+</sup> Calcd for C<sub>35</sub>H<sub>42</sub>IN<sub>3</sub>O<sub>8</sub> 759.2017; Found 759.2023. FT-IR (KBr): ν<sub>as</sub>(N-H)<sub>carbamate</sub> = 3439 cm<sup>-1</sup>, ν<sub>s</sub>(N-H)<sub>carbamate</sub> = 3393 cm<sup>-1</sup>, ν<sub>s</sub>(N-H)<sub>lactam</sub> = 3337 cm<sup>-1</sup>, ν(O-H)<sub>phenol</sub> = 3295 cm<sup>-1</sup>, ν(O-H) = 3181 cm<sup>-1</sup>, ν<sub>as</sub>(C-H) = 2924 cm<sup>-1</sup>, ν<sub>s</sub>(C-H) = 2823 cm<sup>-1</sup>, ν(C=O)<sub>carbamate</sub> = 1732 cm<sup>-1</sup>, ν(C=O)<sub>lactam</sub> = 1698 cm<sup>-1</sup>, ν(C=N) = 1645 cm<sup>-1</sup>, ν(C=C) = 1613 cm<sup>-1</sup>, δ(N-H) = 1535 cm<sup>-1</sup>, δ(N-H)<sub>carbamate</sub> = 1478 cm<sup>-1</sup>, ν(C-N)<sub>carbamate</sub> = 1378 cm<sup>-1</sup>, ν(C-I) = 1328 cm<sup>-1</sup>, ν(C-O-C)<sub>carbamate</sub> = 1174 cm<sup>-1</sup>, ν(C-O-C) = 1106 cm<sup>-1</sup>, ν(C-O-C)<sub>methoxy</sub> = 1061 cm<sup>-1</sup>, γ(C-H)<sub>ar</sub> = 784 cm<sup>-1</sup>, γ(N-H)<sub>carbamate</sub> = 679 cm<sup>-1</sup>. <sup>1</sup>H NMR (500 MHz, DMSO-*d*<sub>6</sub>+ ACN-*d*<sub>3</sub>) δ 9.41 (s, 1H, NH-1), 8.52 (s, 1H, OH-21), 7.99 (d, *J*<sub>H-31,35,H-32,34</sub> = 8.5 Hz, 2H, H-31,35), 7.89 (d, *J*<sub>H-31,35,H-32,34</sub> = 8.5 Hz, 2H, H-32,34), 7.29 (s, 1H, H-19), 6.35 – 6.26 (m, 1H, H-4), 6.34 (s, 1H, NH<sub>2</sub>-24), 6.19 (s, 1H, NH<sub>2</sub>-24), 6.01 (d, *J*<sub>H-3,H-4</sub> = 11.6 Hz, 1H, H-3), 5.00 – 4.87 (m, 2H, H-5,9), 4.71 – 4.69 (m, 1H, H-7), 4.11 (s, 1H, OH-11), 3.74 (t, *J*<sub>H-6,H-7</sub> = 10.2 Hz, 1H, H-6), 3.28 (s, 1H, H-11), 3.20 (s, 3H, H-27), 3.11-3.04 (m, 1H, H-15), 2.97 (bs, 1H, H-15), 2.95 (s, 3H, H-23), 2.68 (bs, 1H, H-12), 2.28 – 2.21 (m, 1H, H-14), 1.96 (s, 3H, H-22), 1.81 – 1.69 (m, 1H, H-10), 1.68 – 1.57 (m, 1H, H-13), 0.75-0.71 (m, 3H, H-28), 0.64 (d, *J*<sub>H-10,H-26</sub> = 6.3 Hz, 3H, H-26), 0.51-0.44 (m, 1H, H-13), 0.31 (s, 3H, H-25). <sup>13</sup>C{<sup>1</sup>H} NMR (126 MHz, DMSO-*d*<sub>6</sub>+ ACN-*d*<sub>3</sub>) δ 174.1 (C-1), 161.6 (C-29), 156.5 (C-24), 148.1 (C-21), 144.4 (C-18), 140.6 (C-17), 138.7 (C-32), 138.6 (C-34), 135.7 (C-2), 133.7 (C-9), 129.8 (C-4), 129.1 (C-8), 128.8\* (C-31,35), 127.8 (C-5), 127.6 (C-20), 127.0 (C-30), 123.5 (C-3), 119.3 (C-16), 104.8 (C-19), 99.1 (C-33), 80.4 (C-7), 79.8 (C-12), 74.5 (C-6), 71.5 (C-11), 55.8 (C-27), 55.3 (C-23), 34.9 (C-10), 31.6 (C-15), 31.2 (C-13), 30.4 (C-14), 18.6 (C-26), 16.8 (C-28), 13.9 (C-22), 9.7 (C-25). (\*-overlapped)

**Compound 6a.** (4E,6Z,8S,9S,10E,12S,13R,14S,16R)-1<sup>5</sup>,13-dihydroxy-8,14-dimethoxy-4,10,12,16-tetramethyl-3-oxo-1<sup>2</sup>-(4-(trifluoromethyl)phenyl)-2-aza-1(6,4)-benzo[d]oxazolacycloheptadecaphane-4,6,10-trien-9-yl carbamate (76 mg, yield 76 %), mp 248-250 °C, HPLC (OD-H, water/acetonitrile = 35/65, flow rate = 1.0 mL/min, l = 260 nm) tR = 5.778 min (major). Anal. Calcd for C<sub>36</sub>H<sub>42</sub>F<sub>3</sub>N<sub>3</sub>O<sub>8</sub>: C, 61.62; H, 6.03; F, 8.12; N, 5.99. Found: C, 61.60; H, 6.00; F, 8.11; N, 6.00. HRMS (MALDI-TOF) m/z: [M + H]<sup>+</sup> Calcd for C<sub>36</sub>H<sub>42</sub>F<sub>3</sub>N<sub>3</sub>O<sub>8</sub> 701.2924; Found 701.3189. FT-IR (KBr): ν<sub>as</sub>(N-H)<sub>carbamate</sub> = 3438.71 cm<sup>-1</sup>, ν<sub>s</sub>(N-H)<sub>carbamate</sub> = 3392.06 cm<sup>-1</sup>, ν<sub>s</sub>(N-H)<sub>lactam</sub> = 3339.76 cm<sup>-1</sup>, ν(O-H)<sub>phenol</sub> = 3286.89 cm<sup>-1</sup>, ν(O-H) = 3185.93 cm<sup>-1</sup>, ν<sub>as</sub>(C-H) = 2927.85 cm<sup>-1</sup>, ν<sub>s</sub>(C-H) = 2825.05 cm<sup>-1</sup>, ν(C=O)<sub>carbamate</sub> = 1731.78 cm<sup>-1</sup>, ν(C=O)<sub>lactam</sub> = 1697.99 cm<sup>-1</sup>, ν(C=N) = 1648.20 cm<sup>-1</sup>, ν(C=C) = 1622.01 cm<sup>-1</sup>, δ(N-H) = 1535.57 cm<sup>-1</sup>, δ(N-H)<sub>carbamate</sub> = 1481.91 cm<sup>-1</sup>, ν(C-N)<sub>carbamate</sub> = 1379.09 cm<sup>-1</sup>, ν(C-F) = 1327.93 cm<sup>-1</sup>, ν(C-O-C)<sub>carbamate</sub> = 1174.58 cm<sup>-1</sup>, ν(C-O-C) = 1109.90 cm<sup>-1</sup>, ν(C-O-C)<sub>methoxy</sub> = 1070.49 cm<sup>-1</sup>, γ(C-H)<sub>ar</sub> = 786.36 cm<sup>-1</sup>, γ(N-H)<sub>carbamate</sub> = 679.49 cm<sup>-1</sup>. <sup>1</sup>H NMR (500 MHz, DMSO-*d*<sub>6</sub>+ ACN-*d*<sub>3</sub>) δ 9.50 (s, 1H, NH-1), 8.62 (s, 1H, OH-21), 8.32 (d, *J*<sub>H-31,35,H-32,34</sub> = 8.3 Hz, 2H, H-31,35), 7.96 (d, *J*<sub>H-31,35,H-32,34</sub> = 8.4 Hz, 2H, H-32,34), 7.35 (s, 1H, H-19), 6.43 – 6.36 (m, 1H, NH<sub>2</sub>-24), 6.30 (t, *J*<sub>H-3,H-4</sub> = 11.5 Hz, 1H, H-4), 6.22 (s, 1H, NH<sub>2</sub>-24), 6.02 (d, *J*<sub>H-3,H-4</sub> = 11.6 Hz, 1H, H-3), 4.99 – 4.92 (m, 1H, H-5), 4.92 – 4.87 (m, 1H, H-9), 4.67 (d, *J*<sub>H-6,H-7</sub> = 9.8 Hz, 1H, H-7), 4.21 (s, 1H, OH-11), 3.73 (t, *J*<sub>H-6,H-7</sub> = 10.1 Hz, 1H, H-6), 3.52 (s, 1H, H-11), 3.26 (d, *J*<sub>H-3,H-4</sub> = 12.4 Hz, 1H, H-15), 3.19 (s, 3H, H-27), 3.10 (d, *J*<sub>H-3,H-4</sub> = 12.9 Hz, 1H, H-15), 2.96 (s, 3H, H-23), 2.71 – 2.64 (m, 1H, H-12), 2.27 (s, 1H, H-14), 1.96 (s, 3H, H-22), 1.81 – 1.72 (m, 1H, H-10), 1.71 – 1.63 (m, 1H, H-13), 0.74 (d, *J*<sub>H-14,H-28</sub> = 6.4 Hz, 3H, H-28), 0.61 (d, *J*<sub>H-10,H-26</sub> = 6.1 Hz, 3H, H-26), 0.55 – 0.45 (m, 1H, H-13), 0.31 (s, 3H, H-25). <sup>13</sup>C{<sup>1</sup>H} NMR (126 MHz, DMSO-*d*<sub>6</sub>+ ACN-*d*<sub>3</sub>) δ 174.0 (C-1), 160.7 (C-29), 156.4 (C-24), 148.2 (C-21), 144.5 (C-18), 140.5 (C-17), 135.8 (C-2), 133.8 (C-9), 131.1 (C-33), 129.8 (C-4), 129.0 (C-8), 128.4 (C-8), 127.8\* (C-31,35), 126.7\* (C-32,34), 126.7 (C-5), 126.6 (C-20), 125.4 (C-36), 123.5 (C-3), 119.5 (C-16), 104.9 (C-19), 80.4 (C-7), 79.8 (C-12), 74.4 (C-6), 71.5 (C-11), 55.8 (C-27), 55.3 (C-23), 34.9 (C-10), 31.6 (C-15), 31.1 (C-13), 30.4 (C-14), 18.6 (C-26), 16.8 (C-28), 13.9 (C-22), 9.7 (C-25). (\*-overlapped)

**Compound 7a.** (4E,6Z,8S,9S,10E,12S,13R,14S,16R)-1<sup>5</sup>,13-dihydroxy-8,14-dimethoxy-4,10,12,16-tetramethyl-3-oxo-1<sup>2</sup>-(4-(trifluoromethoxy)phenyl)-2-aza-1(6,4)-benzo[d]oxazolacycloheptadecaphane-4,6,10-trien-9-yl carbamate (82 mg, yield 82 %), mp 220-221 °C, HPLC (OD-H, water/acetonitrile = 35/65, flow rate = 1.0 mL/min, l = 260 nm) tR = 5.725 min (major). Anal. Calcd for C<sub>36</sub>H<sub>42</sub>F<sub>3</sub>N<sub>3</sub>O<sub>9</sub>: C, 60.24; H, 5.90; F, 7.94; N, 5.85. Found: C, 60.23; H, 5.91; F, 7.92; N, 5.82. HRMS (MALDI-TOF) m/z: [M + H]<sup>+</sup> Calcd for C<sub>36</sub>H<sub>42</sub>F<sub>3</sub>N<sub>3</sub>O<sub>9</sub> 717.2873; Found 717.1927. FT-IR (KBr): ν<sub>as</sub>(N-H)<sub>carbamate</sub> = 3438.36 cm<sup>-1</sup>, ν<sub>s</sub>(N-H)<sub>carbamate</sub> = 3395.24 cm<sup>-1</sup>, ν<sub>s</sub>(N-H)<sub>lactam</sub> = 3339.36 cm<sup>-1</sup>, ν(O-H)<sub>phenol</sub> = 3301.07 cm<sup>-1</sup>, ν(O-H) = 3185.62 cm<sup>-1</sup>, ν<sub>as</sub>(C-H) = 2927.37 cm<sup>-1</sup>, ν<sub>s</sub>(C-H) = 2824.60 cm<sup>-1</sup>, ν(C=O)<sub>carbamate</sub> = 1732.08 cm<sup>-1</sup>, ν(C=O)<sub>lactam</sub> = 1698.10 cm<sup>-1</sup>, ν(C=N) = 1646.94 cm<sup>-1</sup>, ν(C=C) = 1614.63 cm<sup>-1</sup>, δ(N-H) = 1534.18 cm<sup>-1</sup>, δ(N-H)<sub>carbamate</sub> = 1480.94 cm<sup>-1</sup>, ν(C-N)<sub>carbamate</sub> = 1379.07 cm<sup>-1</sup>, ν(C-O-C)<sub>carbamate</sub> = 1176.70 cm<sup>-1</sup>, ν(C-O-C) = 1105.25 cm<sup>-1</sup>, ν(C-O-C)<sub>methoxy</sub> = 1061.28 cm<sup>-1</sup>, γ(C-H)<sub>ar</sub> = 785.29 cm<sup>-1</sup>, γ(N-H)<sub>carbamate</sub> = 706.82 cm<sup>-1</sup>.

<sup>1</sup>H NMR (500 MHz, DMSO-*d*<sub>6</sub>+ ACN-*d*<sub>3</sub>) δ 9.45 (s, 1H, NH-1), 8.55 (s, 1H, OH-21), 8.22 (d,  $J^3_{H-31,35,H-32,34}$  = 8.6 Hz, 2H, H-31,35), 7.56 (d,  $J^3_{H-31,35,H-32,34}$  = 8.7 Hz, 2H, H-32,34), 7.30 (s, 1H, H-19), 6.37 (s, 1H, NH<sub>2</sub>-24), 6.28 (t,  $J^3_{H-3,H-4}$  = 11.4 Hz, 1H, H-4), 6.20 (s, 1H, NH<sub>2</sub>-24), 5.99 (d,  $J^3_{H-3,H-4}$  = 11.6 Hz, 1H, H-3), 4.98 – 4.86 (m, 2H, H-5,9), 4.68 – 4.60 (m, 1H, H-7), 4.18 (s, 1H, OH-11), 3.72 (t,  $J^3_{H-6,H-7}$  = 10.1 Hz, 1H, H-6), 3.26 – 3.20 (m, 1H, H-11), 3.17 (s, 3H, H-27), 3.08 (d,  $J^2$  = 12.2 Hz, 1H, H-15), 2.94 (s, 3H, H-23), 2.87 (s, 1H, H-15), 2.65 (bs, 1H, H-12), 2.23 (bs, 1H, H-14), 1.94 (s, 3H, H-22), 1.84 – 1.70 (m, 1H, H-10), 1.70 – 1.64 (m, 1H, H-13), 0.71 (d,  $J^3_{H-14,H-28}$  = 6.4 Hz, 3H, H-28), 0.59 (d,  $J^3_{H-10,H-26}$  = 6.1 Hz, 3H, H-26), 0.52 – 0.43 (m, 1H, H-13), 0.30 (s, 3H, H-25). <sup>13</sup>C{<sup>1</sup>H} NMR (126 MHz, DMSO-*d*<sub>6</sub>+ ACN-*d*<sub>3</sub>) δ 174.0 (C-1), 160.9 (C-29), 156.4 (C-24), 150.9 (C-33), 148.1 (C-21), 144.4 (C-18), 140.6 (C-17), 135.8 (C-2), 133.8 (C-9), 132.2 (C-30), 130.0 (C-4), 129.8 (C-36), 129.3\* (C-31,35), 129.0 (C-8), 127.6 (C-5), 126.6 (C-20), 123.5 (C-3), 122.2\* (C-31,35), 119.3 (C-16), 104.9 (C-19), 80.4 (C-7), 79.8 (C-12), 74.5 (C-6), 71.4 (C-11), 55.8 (C-27), 55.3 (C-23), 34.9 (C-10), 31.6 (C-15), 31.2 (C-13), 30.4 (C-14), 18.5 (C-26), 16.8 (C-28), 14.0 (C-22), 9.7 (C-25). (\*-overlapped), bs - broad singlet

**Compound 8a.** (4*E*,6*Z*,8*S*,9*S*,10*E*,12*S*,13*R*,14*S*,16*R*)-1<sup>5</sup>,13-dihydroxy-8,14-dimethoxy-4,10,12,16-tetramethyl-3-oxo-2-aza-1(6,4)-benzo[*d*]oxazolacycloheptadecaphane-4,6,10-trien-9-yl carbamate (81 mg, yield 81 %), mp 222-223 °C, HPLC (OD-H, water/acetonitrile = 35/65, flow rate = 1.0 mL/min, l = 260 nm) tR = 3.692 min (major). Anal. Calcd for C<sub>36</sub>H<sub>42</sub>N<sub>4</sub>O<sub>8</sub>: C, 65.64; H, 6.43; N, 8.51. Found: C, 65.66; H, 6.44; N, 8.50. HRMS (MALDI-TOF) m/z: [M + H]<sup>+</sup> Calcd for C<sub>36</sub>H<sub>42</sub>N<sub>4</sub>O<sub>8</sub> 658.3003; Found 658.2941. FT-IR (KBr): ν<sub>as</sub>(N-H)<sub>carbamate</sub> = 3433.74 cm<sup>-1</sup>, ν<sub>s</sub>(N-H)<sub>carbamate</sub> = 3390.72 cm<sup>-1</sup>, ν<sub>s</sub>(N-H)<sub>lactam</sub> = 3339.52 cm<sup>-1</sup>, ν(O-H)<sub>phenol</sub> = 3292.97 cm<sup>-1</sup>, ν(O-H) = 3185.13 cm<sup>-1</sup>, ν<sub>as</sub>(C-H) = 2930.27 cm<sup>-1</sup>, ν<sub>s</sub>(C-H) = 2825.86 cm<sup>-1</sup>, ν(C-N) = 2229.72 cm<sup>-1</sup>, ν(C=O)<sub>carbamate</sub> = 1730.12 cm<sup>-1</sup>, ν(C=O)<sub>lactam</sub> = 1696.41 cm<sup>-1</sup>, ν(C=N) = 1649.94 cm<sup>-1</sup>, ν(C=C) = 1616.68 cm<sup>-1</sup>, δ(N-H) = 1534.07 cm<sup>-1</sup>, δ(N-H)<sub>carbamate</sub> = 1481.10 cm<sup>-1</sup>, ν(C-N)<sub>carbamate</sub> = 1378.55 cm<sup>-1</sup>, ν(C-O-C)<sub>carbamate</sub> = 1177.62 cm<sup>-1</sup>, ν(C-O-C) = 1104.84 cm<sup>-1</sup>, ν(C-O-C)<sub>methoxy</sub> = 1060.70 cm<sup>-1</sup>, γ(=C-H)<sub>ar</sub> = 785.26 cm<sup>-1</sup>, γ(N-H)<sub>carbamate</sub> = 688.75 cm<sup>-1</sup>. <sup>1</sup>H NMR (500 MHz, DMSO-*d*<sub>6</sub>+ ACN-*d*<sub>3</sub>) δ 9.57 (s, 1H, NH-1), 8.34 (bs, 1H, OH-21), 8.04 (d,  $J^3_{H-31,35,H-32,34}$  = 7.9 Hz, 2H, H-31,35), 7.57 (d,  $J^3_{H-31,35,H-32,34}$  = 7.9 Hz, 2H, H-32,34), 7.34 (s, 1H, H-19), 6.50 (s, 1H, NH<sub>2</sub>-24), 6.32 – 6.28 (m, 2H, H-4, NH<sub>2</sub>-24), 6.01 (d,  $J^3_{H-3,H-4}$  = 11.5 Hz, 1H, H-3), 4.96 – 4.91 (m, 1H, H-5), 4.91 – 4.87 (m, 1H, H-9), 4.66 (d,  $J^3_{H-6,H-7}$  = 9.6 Hz, 1H, H-7), 4.30 (s, 1H, OH-11), 3.72 (t,  $J^3_{H-6,H-7}$  = 10.2 Hz, 1H, H-6), 3.44 – 3.37 (m, 1H, H-11), 3.18 (s, 3H, H-27), 3.13 – 3.07 (m, 1H, H-15), 2.94 (s, 3H, H-23), 2.93 (bs, 1H, H-15), 2.67 – 2.59 (m, 1H, H-12), 2.23 (bs, 1H, H-14), 1.95 (s, 3H, H-22), 1.71 (bs, 1H, H-10), 1.68 (bs, 1H, H-13), 0.71 (d,  $J^3_{H-14,H-28}$  = 6.4 Hz, 3H, H-28), 0.60 (d,  $J^3_{H-10,H-26}$  = 6.3 Hz, 3H, H-26), 0.45 (t,  $J^2$  = 12.9 Hz, 1H, H-13), 0.26 (s, 3H, H-25). <sup>13</sup>C{<sup>1</sup>H} NMR (126 MHz, DMSO-*d*<sub>6</sub>+ ACN-*d*<sub>3</sub>) δ 174.2 (C-1), 160.6 (C-29), 156.5 (C-24), 148.4 (C-21), 144.6 (C-18), 140.6 (C-17), 137.9 (C-30), 135.9 (C-2), 133.9 (C-9), 132.8\* (C-32,34), 130.0 (C-4), 129.0 (C-8), 128.8\* (C-31,35), 127.7(C-5), 127.3 (C-20), 123.6 (C-3), 119.6 (C-16), 119.5 (C-36), 113.0 (C-33), 105.0 (C-19), 80.4 (C-7), 79.8 (C-12), 74.5 (C-6), 71.3 (C-11), 55.9 (C-27), 55.4 (C-23), 35.0 (C-10), 31.6 (C-15), 31.2 (C-13), 30.5 (C-14), 18.8 (C-26), 16.7 (C-28), 14.1 (C-22), 9.8 (C-25). (\*-overlapped), bs - broad singlet

**Compound 9a.** (4*E*,6*Z*,8*S*,9*S*,10*E*,12*S*,13*R*,14*S*,16*R*)-1<sup>5</sup>,13-dihydroxy-8,14-dimethoxy-4,10,12,16-tetramethyl-1<sup>2</sup>-(4-nitrophenyl)-3-oxo-2-aza-1(6,4)-benzo[*d*]oxazolacycloheptadecaphane-4,6,10-trien-9-yl carbamate (69 mg, yield 69 %), mp 224-226 °C, HPLC (OD-H, water/acetonitrile = 35/65, flow rate = 1.0 mL/min, l = 260 nm) tR = 4.238 min (major). Anal. Calcd for C<sub>35</sub>H<sub>42</sub>N<sub>4</sub>O<sub>10</sub>: C, 61.94; H, 6.24; N, 8.25. Found: C, 61.96; H, 6.26; N, 8.26. HRMS (MALDI-TOF) m/z: [M + H]<sup>+</sup> Calcd for C<sub>35</sub>H<sub>42</sub>N<sub>4</sub>O<sub>10</sub> 678.2901; Found 678.3214. FT-IR (KBr): ν<sub>as</sub>(N-H)<sub>carbamate</sub> = 3433.82 cm<sup>-1</sup>, ν<sub>s</sub>(N-H)<sub>carbamate</sub> = 3392.23 cm<sup>-1</sup>, ν<sub>s</sub>(N-H)<sub>lactam</sub> = 3339.69 cm<sup>-1</sup>, ν(O-H)<sub>phenol</sub> = 3288.91 cm<sup>-1</sup>, ν(O-H) = 3187.03 cm<sup>-1</sup>, ν<sub>as</sub>(C-H) = 2929.00 cm<sup>-1</sup>, ν<sub>s</sub>(C-H) = 2825.60 cm<sup>-1</sup>, ν(C=O)<sub>carbamate</sub> = 1729.56 cm<sup>-1</sup>, ν(C=O)<sub>lactam</sub> = 1696.08 cm<sup>-1</sup>, ν(C=N) = 1656.93 cm<sup>-1</sup>, ν(C=C) = 1615.26 cm<sup>-1</sup>, δ(N-H), ν<sub>as</sub>(C-NO<sub>2</sub>) = 1526.67 cm<sup>-1</sup>, δ(N-H)<sub>carbamate</sub> = 1483.18 cm<sup>-1</sup>, ν(C-N)<sub>carbamate</sub> = 1378.13 cm<sup>-1</sup>, ν<sub>s</sub>(C-NO<sub>2</sub>) = 1344.43 cm<sup>-1</sup>, ν(C-O-C)<sub>carbamate</sub> = 1177.34 cm<sup>-1</sup>, ν(C-O-C) = 1106.35 cm<sup>-1</sup>, ν(C-O-C)<sub>methoxy</sub> = 1059.62 cm<sup>-1</sup>, γ(=C-H)<sub>ar</sub> = 785.59 cm<sup>-1</sup>, γ(N-H)<sub>carbamate</sub> = 710.20 cm<sup>-1</sup>. <sup>1</sup>H NMR (500 MHz, DMSO-*d*<sub>6</sub>+ ACN-*d*<sub>3</sub>) δ 9.59 (s, 1H, NH-1), 8.76 (s, 1H, OH-21), 8.45 (d,  $J^3_{H-31,35,H-32,34}$  = 8.5 Hz, 2H, H-32,34), 8.34 (d,  $J^3_{H-31,35,H-32,34}$  = 8.5 Hz, 2H, H-31,35), 7.36 (s, 1H, H-19), 6.44 (s, 1H, NH<sub>2</sub>-24), 6.34 – 6.25 (m, 2H, H-4, NH<sub>2</sub>-24), 6.02 (d,  $J^3_{H-3,H-4}$  = 11.5 Hz, 1H, H-3), 4.96 – 4.87 (m, 2H, H-5,9), 4.66 (d,  $J^3_{H-6,H-7}$  = 9.6 Hz, 1H, H-7), 4.31 (s, 1H, OH-11), 3.73 (t,  $J^3_{H-6,H-7}$  = 10.1 Hz, 1H, H-6), 3.28 – 3.24 (m, 1H, H-11), 3.18 (s, 3H, H-27), 3.14 – 3.07 (m, 1H, H-15), 2.94 (s, 3H, H-23), 2.68 – 2.62 (m, 2H, H-12,15), 2.30 – 2.23 (m, 1H, H-14), 1.96 (s, 3H, H-22), 1.70 (bs, 2H, H-10,13), 0.73 (d,  $J^3_{H-14,H-28}$  = 6.6 Hz, 3H, H-28), 0.61 (d,  $J^3_{H-10,H-26}$  = 6.3 Hz, 3H, H-26), 0.53 – 0.44 (m, 1H, H-13), 0.27 (s, 3H, H-25). <sup>13</sup>C{<sup>1</sup>H} NMR (126 MHz, DMSO-*d*<sub>6</sub>+ ACN-*d*<sub>3</sub>) δ 174.2 (C-1), 160.3 (C-29), 156.5 (C-24), 149.4 (C-33), 148.5 (C-21), 144.8 (C-18), 140.7 (C-17), 137.9 (C-30), 135.9 (C-2), 133.8 (C-9), 133.0\* (C-31,35), 129.9 (C-4), 129.0 (C-8), 128.9\* (C-32,34), 128.1 (C-5,20), 125.1 (C-3), 119.6 (C-16), 105.1 (C-19), 80.4 (C-7), 79.9 (C-12), 74.6 (C-6), 71.5 (C-11), 55.5 (C-27), 55.2 (C-23), 35.1 (C-10), 32.1 (C-15), 30.6 (C-14), 29.9 (C-13), 18.7 (C-26), 16.8 (C-28), 14.0 (C-22), 9.7 (C-25). (\*-overlapped), bs - broad singlet

**Compound 10a.** (4*E*,6*Z*,8*S*,9*S*,10*E*,12*S*,13*R*,14*S*,16*R*)-1<sup>5</sup>,13-dihydroxy-8,14-dimethoxy-4,10,12,16-tetramethyl-3-oxo-1<sup>2</sup>-(*p*-tolyl)-2-aza-1(6,4)-benzo[*d*]oxazolacycloheptadecaphane-4,6,10-trien-9-yl carbamate (79 mg, yield 79 %), mp 241-242 °C, HPLC (OD-H, water/acetonitrile = 35/65, flow rate = 1.0 mL/min, l = 260 nm) tR = 4.378 min (major). Anal. Calcd for C<sub>36</sub>H<sub>45</sub>N<sub>3</sub>O<sub>8</sub>: C, 66.75; H, 7.00; N, 6.49. Found: C, 66.74; H, 7.02; N, 6.50. HRMS (MALDI-TOF) m/z: [M + H]<sup>+</sup> Calcd for C<sub>36</sub>H<sub>45</sub>N<sub>3</sub>O<sub>8</sub> 647.3207; Found 647.3139. FT-IR (KBr): ν<sub>as</sub>(N-H)<sub>carbamate</sub> = 3437.35 cm<sup>-1</sup>, ν<sub>s</sub>(N-H)<sub>carbamate</sub> = 3392.79 cm<sup>-1</sup>, ν<sub>s</sub>(N-H)<sub>lactam</sub> = 3337.69 cm<sup>-1</sup>, ν(O-H)<sub>phenol</sub> = 3292.97 cm<sup>-1</sup>, ν(O-H) = 3183.55 cm<sup>-1</sup>, ν<sub>as</sub>(C-H) = 2926.44 cm<sup>-1</sup>, ν<sub>s</sub>(C-H) = 2824.98 cm<sup>-1</sup>, ν(C=O)<sub>carbamate</sub> = 1733.40 cm<sup>-1</sup>, ν(C=O)<sub>lactam</sub> = 1699.71 cm<sup>-1</sup>, ν(C=N) = 1645.55 cm<sup>-1</sup>, ν(C=C) = 1615.72 cm<sup>-1</sup>, δ(N-H) = 1533.94 cm<sup>-1</sup>, δ(N-H)<sub>carbamate</sub> = 1479.88 cm<sup>-1</sup>, ν(C-N)<sub>carbamate</sub> = 1378.43 cm<sup>-1</sup>, ν(C-O-C)<sub>carbamate</sub> = 1175.32 cm<sup>-1</sup>, ν(C-O-C) = 1105.47 cm<sup>-1</sup>, ν(C-O-C)<sub>methoxy</sub> = 1061.72 cm<sup>-1</sup>, γ(=C-H)<sub>ar</sub> = 783.60 cm<sup>-1</sup>, γ(N-H)<sub>carbamate</sub> = 678.24 cm<sup>-1</sup>. <sup>1</sup>H NMR (500 MHz, DMSO-*d*<sub>6</sub>+ ACN-*d*<sub>3</sub>) δ 9.43 (s, 1H, NH-1), 8.49 (s, 1H, OH-21), 8.02 (d, *J*<sup>3</sup><sub>H-31,35,H-32,34</sub> = 7.9 Hz, 2H, H-31,35), 7.41 (d, *J*<sup>3</sup><sub>H-31,35,H-32,34</sub> = 7.8 Hz, 2H, H-32,34), 7.29 (s, 1H, H-19), 6.39 (s, 1H, NH<sub>2</sub>-24), 6.30 (t, *J*<sup>3</sup><sub>H-3,H-4</sub> = 11.5 Hz, 1H, H-4), 6.21 (s, 1H, NH<sub>2</sub>-24), 5.99 (d, *J*<sup>3</sup><sub>H-3,H-4</sub> = 11.6 Hz, 1H, H-3), 4.93 – 4.87 (m, 2H, H-5,9), 4.69 – 4.63 (m, 1H, H-7), 4.19 (s, 1H, OH-11), 3.72 (t, *J*<sup>3</sup><sub>H-6,H-7</sub> = 10.1 Hz, 1H, H-6), 3.28 – 3.23 (m, 1H, H-11), 3.19 (s, 3H, H-27), 3.08 (d, *J*<sup>2</sup> = 11.4 Hz, 1H, H-15), 2.95 (s, 3H, H-23), 2.89 (s, 1H, H-15), 2.70 – 2.65 (m, 1H, H-12), 2.42 (s, 3H, H-36), 2.24 (bs, 1H, H-14), 1.96 (s, 3H, H-22), 1.85 – 1.78 (m, 1H, H-10), 1.74 – 1.67 (m, 1H, H-13), 0.73 (d, *J*<sup>3</sup><sub>H-14,H-28</sub> = 6.6 Hz, 3H, H-28), 0.63 (d, *J*<sup>3</sup><sub>H-10,H-26</sub> = 6.3 Hz, 3H, H-26), 0.57 – 0.47 (m, 1H, H-13), 0.30 (s, 3H, H-25). <sup>13</sup>C{<sup>1</sup>H} NMR (126 MHz, DMSO-*d*<sub>6</sub>+ ACN-*d*<sub>3</sub>) δ 174.0 (C-1), 162.5 (C-29), 156.4 (C-24), 147.9 (C-21), 144.2 (C-18), 142.3 (C-33), 140.7 (C-17), 135.8 (C-2), 133.7 (C-9), 130.3\* (C-31,35), 129.8 (C-4), 129.1 (C-8), 127.5 (C-5), 127.3\* (C-32,34), 127.2 (C-20), 124.8 (C-30), 123.4 (C-3), 119.1 (C-16), 104.8 (C-19), 80.4 (C-7), 79.9 (C-12), 74.5 (C-6), 71.4 (C-11), 55.8 (C-27), 55.3 (C-23), 34.9 (C-10), 31.6 (C-15), 31.1 (C-13), 30.4 (C-14), 21.3 (C-36), 18.8 (C-26), 16.7 (C-28), 14.0 (C-22), 9.7 (C-25). (\*-overlapped), bs - broad singlet

**Compound 11a.** (4*E*,6*Z*,8*S*,9*S*,10*E*,12*S*,13*R*,14*S*,16*R*)-1<sup>5</sup>,13-dihydroxy-8,14-dimethoxy-1<sup>2</sup>-(4-methoxyphenyl)-4,10,12,16-tetramethyl-3-oxo-2-aza-1(6,4)-benzo[*d*]oxazolacycloheptadecaphane-4,6,10-trien-9-yl carbamate (85 mg, yield 85 %), mp 202-204 °C, HPLC (OD-H, water/acetonitrile = 35/65, flow rate = 1.0 mL/min, l = 260 nm) tR = 3.552 min (major). Anal. Calcd for C<sub>36</sub>H<sub>45</sub>N<sub>3</sub>O<sub>9</sub>: C, 65.14; H, 6.83; N, 6.33. Found: C, 65.12; H, 6.84; N, 6.32. HRMS (MALDI-TOF) m/z: [M + H]<sup>+</sup> Calcd for C<sub>36</sub>H<sub>45</sub>N<sub>3</sub>O<sub>9</sub> 663.3156; Found 663.3274. FT-IR (KBr): ν<sub>as</sub>(N-H)<sub>carbamate</sub> = 3436.41 cm<sup>-1</sup>, ν<sub>s</sub>(N-H)<sub>carbamate</sub> = 3395.05 cm<sup>-1</sup>, ν<sub>s</sub>(N-H)<sub>lactam</sub> = 3333.48 cm<sup>-1</sup>, ν(O-H)<sub>phenol</sub> = 3291.67 cm<sup>-1</sup>, ν(O-H) = 3181.41 cm<sup>-1</sup>, ν<sub>as</sub>(C-H) = 2960.72 cm<sup>-1</sup>, ν(C=O)<sub>carbamate</sub> = 1731.20 cm<sup>-1</sup>, ν(C=O)<sub>lactam</sub> = 1697.71 cm<sup>-1</sup>, ν(C=N) = 1645.48 cm<sup>-1</sup>, ν(C=C) = 1613.32 cm<sup>-1</sup>, δ(N-H) = 1535.66 cm<sup>-1</sup>, δ(N-H)<sub>carbamate</sub> = 1480.22 cm<sup>-1</sup>, ν(C-N)<sub>carbamate</sub> = 1378.09 cm<sup>-1</sup>, ν(C-O-C)<sub>carbamate</sub> = 1167.35 cm<sup>-1</sup>, ν(C-O-C) = 1105.38 cm<sup>-1</sup>, ν(C-O-C)<sub>methoxy</sub> = 1060.78 cm<sup>-1</sup>, γ(=C-H)<sub>ar</sub> = 784.02 cm<sup>-1</sup>, γ(N-H)<sub>carbamate</sub> = 681.67 cm<sup>-1</sup>. <sup>1</sup>H NMR (500 MHz, DMSO-*d*<sub>6</sub>+ ACN-*d*<sub>3</sub>) δ 9.47 (s, 1H, NH-1), 8.50 (s, 1H, OH-21), 8.07 (d, *J*<sup>3</sup><sub>H-31,35,H-32,34</sub> = 8.6 Hz, 2H, H-31,35), 7.27 (s, 1H, H-19), 7.14 (d, *J*<sup>3</sup><sub>H-31,35,H-32,34</sub> = 8.9 Hz, 2H, H-32,34), 6.46 (s, 1H, NH<sub>2</sub>-24), 6.33 – 6.26 (m, 2H, H-4, NH<sub>2</sub>-24), 5.99 (d, *J*<sup>3</sup><sub>H-3,H-4</sub> = 11.6 Hz, 1H, H-3), 4.98 – 4.85 (m, 2H, H-5,9), 4.69 – 4.62 (m, 1H, H-7), 4.26 (s, 1H, OH-11), 3.86 (s, 3H, H-36), 3.75 – 3.69 (m, 1H, H-6), 3.45 – 3.39 (m, 1H, H-11), 3.18 (s, 3H, H-27), 3.07 (d, *J*<sup>2</sup> = 11.2 Hz, 1H, H-15), 2.94 (s, 3H, H-23), 2.89 (s, 1H, H-15), 2.69 – 2.61 (m, 1H, H-12), 2.21 (s, 1H, H-14), 1.95 (s, 3H, H-22), 1.83 – 1.77 (m, 1H, H-10), 1.73 – 1.65 (m, 1H, H-13), 0.70 (d, *J*<sup>3</sup><sub>H-14,H-28</sub> = 6.6 Hz, 3H, H-28), 0.63 (d, *J*<sup>3</sup><sub>H-10,H-26</sub> = 6.3 Hz, 3H, H-26), 0.54 – 0.46 (m, 1H, H-13), 0.30 (s, 3H, H-25). <sup>13</sup>C{<sup>1</sup>H} NMR (126 MHz, DMSO-*d*<sub>6</sub>+ ACN-*d*<sub>3</sub>) δ 174.2 (C-1), 162.5 (C-33), 162.3 (C-29), 156.5 (C-24), 148.0 (C-21), 144.2 (C-18), 140.9 (C-17), 135.8 (C-2), 133.9 (C-9), 130.0 (C-4), 129.2\* (C-8,31,35), 127.4 (C-5), 126.9\* (C-20,30), 123.5 (C-3), 120.0 (C-16), 104.8 (C-19), 115.1\* (C-32,34), 80.4 (C-7), 79.9 (C-12), 74.5 (C-6), 71.3 (C-11), 55.9 (C-36), 55.8 (C-27), 55.3 (C-23), 34.9 (C-10), 31.6 (C-15), 31.2 (C-13), 30.5 (C-14), 18.9 (C-26), 16.6 (C-28), 14.2 (C-22), 9.9 (C-25). (\*-overlapped)

**Compound 12a.** (4*E*,6*Z*,8*S*,9*S*,10*E*,12*S*,13*R*,14*S*,16*R*)-1<sup>2</sup>-(4-(dimethylamino)phenyl)-1<sup>5</sup>,13-dihydroxy-8,14-dimethoxy-4,10,12,16-tetramethyl-3-oxo-2-aza-1(6,4)-benzo[*d*]oxazolacycloheptadecaphane-4,6,10-trien-9-yl carbamate (65 mg, yield 65 %), mp 206-208 °C, HPLC (OD-H, water/acetonitrile = 35/65, flow rate = 1.0 mL/min, l = 260 nm) tR = 3.605 min (major). Anal. Calcd for C<sub>37</sub>H<sub>48</sub>N<sub>4</sub>O<sub>8</sub>: C, 65.66; H, 7.15; N, 8.28. Found: C, 65.65; H, 7.16; N, 8.30. HRMS (MALDI-TOF) m/z: [M + H]<sup>+</sup> Calcd for C<sub>37</sub>H<sub>48</sub>N<sub>4</sub>O<sub>8</sub> 676.3472; Found 676.3027. FT-IR (KBr): ν<sub>as</sub>(N-H)<sub>carbamate</sub> = 3430.46 cm<sup>-1</sup>, ν<sub>s</sub>(N-H)<sub>carbamate</sub> = 3347.66 cm<sup>-1</sup>, ν<sub>s</sub>(N-H)<sub>lactam</sub>, ν(O-H)<sub>phenol</sub> = 3294.99 cm<sup>-1</sup>, ν(O-H) = 3191.67 cm<sup>-1</sup>, ν<sub>as</sub>(C-H) = 2924.75 cm<sup>-1</sup>, ν<sub>s</sub>(C-H) = 2820.93 cm<sup>-1</sup>, ν(C=O)<sub>carbamate</sub> = 1733.03 cm<sup>-1</sup>, ν(C=O)<sub>lactam</sub> = 1612.69 cm<sup>-1</sup>, ν(C=N) = 1658.70 cm<sup>-1</sup>, ν(C=C) = 1609.40 cm<sup>-1</sup>, δ(N-H) = 1508.98 cm<sup>-1</sup>, δ(N-H)<sub>carbamate</sub> = 1481.13 cm<sup>-1</sup>, ν(C-N)<sub>carbamate</sub> = 1366.32 cm<sup>-1</sup>, ν(C-O-C)<sub>carbamate</sub> = 1172.24 cm<sup>-1</sup>, ν(C-O-C) = 1104.95 cm<sup>-1</sup>, ν(C-O-C)<sub>methoxy</sub> = 1060.03 cm<sup>-1</sup>, γ(=C-H)<sub>ar</sub> = 782.63 cm<sup>-1</sup>, γ(N-H)<sub>carbamate</sub> = 740.19 cm<sup>-1</sup>. <sup>1</sup>H NMR (600 MHz, DMSO-*d*<sub>6</sub>+ ACN-*d*<sub>3</sub>) δ 9.42 (s, 1H, NH-1), 8.41 (s, 1H, OH-21), 7.95 – 7.92 (m, 2H, H-31,35), 7.22 (s, 1H, H-19), 6.84 (d, *J*<sup>3</sup><sub>H-31,35,H-32,34</sub> = 8.8 Hz, 2H, H-32,34), 6.47 (s, 1H, NH<sub>2</sub>-24), 6.33 – 6.26 (m, 2H, H-4, NH<sub>2</sub>-24), 5.98 (d, *J*<sup>3</sup><sub>H-3,H-4</sub> = 11.5 Hz, 1H, H-3), 4.93 – 4.86 (m, 2H, H-5,9), 4.66 (d, *J*<sup>3</sup><sub>H-6,H-7</sub> = 9.6 Hz, 1H, H-7), 4.25 (s, 1H, OH-11), 3.71 (t, *J*<sup>3</sup><sub>H-6,H-7</sub> = 10.1 Hz, 1H, H-6), 3.44 – 3.41 (m, 1H, H-11), 3.18 (s, 3H, H-27), 3.03 (s, 7H, H-15,36,37), 2.94 (s, 3H, H-23), 2.89 (bs, 1H, H-15), 2.68 – 2.63 (m, 1H, H-12), 2.23 – 2.18 (m, 1H, H-14), 1.95 (s, 3H, H-22), 1.87 – 1.81

(m, 1H, H-10), 1.72 – 1.65 (m, 1H, H-13), 0.70 (d,  $J^3_{\text{H-14,H-28}} = 6.6$  Hz, 3H, H-28), 0.64 (d,  $J^3_{\text{H-10,H-26}} = 6.5$  Hz, 3H, H-26), 0.52 (t,  $J^2 = 13.0$  Hz, 1H, H-13), 0.32 (s, 3H, H-25).  $^{13}\text{C}\{^1\text{H}\}$  NMR (126 MHz, DMSO- $d_6$ + ACN- $d_3$ )  $\delta$  174.2 (C-1), 163.5 (C-29), 156.5 (C-24), 152.5 (C-33), 147.8 (C-21), 144.0 (C-18), 141.3 (C-17), 135.8 (C-2), 133.8 (C-9), 130.0 (C-4), 129.3 (C-8), 128.7\* (C-31,35), 127.4 (C-5), 126.1 (C-20), 123.4 (C-3), 118.5 (C-16), 114.1 (C-30), 112.1\* (C-31,35), 104.6 (C-19), 80.5 (C-7), 80.0 (C-12), 74.5 (C-6), 71.4 (C-11), 55.9 (C-27), 55.3 (C-23), 40.1\* (C-36,37), 34.9 (C-10), 31.5 (C-15), 31.1 (C-13), 30.5 (C-14), 19.0 (C-26), 16.7 (C-28), 14.1 (C-22), 9.9 (C-25). (\*-overlapped). bs - broad singlet

**Compound 13a.** (4*E*,6*Z*,8*S*,9*S*,10*E*,12*S*,13*R*,14*S*,16*R*)-1<sup>5</sup>,13-dihydroxy-8,14-dimethoxy-4,10,12,16-tetramethyl-3-oxo-1<sup>2</sup>-propyl 2-aza-1(6,4)-benzo[*d*]oxazolacycloheptadecaphane-4,6,10-trien-9-yl carbamate (71 mg, yield 66 %), HPLC (OD-H, water/acetonitrile = 55/45, flow rate = 0.75 mL/min,  $\lambda = 260$  nm) tR = 2.065 min (major). Anal. Calcd for C<sub>32</sub>H<sub>45</sub>N<sub>3</sub>O<sub>8</sub>: C, 64.09; H, 7.56; N, 7.01. Found: C, 64.12; H, 7.53; N, 6.99. HRMS (MALDI-TOF) m/z: [M + H]<sup>+</sup> Calcd for C<sub>32</sub>H<sub>46</sub>N<sub>3</sub>O<sub>8</sub> 600.3279; Found 600.3284. FT-IR (KBr):  $\nu(\text{N-H})_{\text{carbamate}} = 3439$  cm<sup>-1</sup>,  $\nu(\text{N-H})_{\text{lactam}} = 3310$  cm<sup>-1</sup>,  $\nu(\text{O-H})_{\text{phenol}} = 3310$  cm<sup>-1</sup>,  $\nu(\text{O-H}) = 3192$  cm<sup>-1</sup>,  $\nu_{\text{as}}(\text{C-H}) = 2962$  cm<sup>-1</sup>, 2931 cm<sup>-1</sup>,  $\nu_{\text{s}}(\text{C-H}) = 2875$  cm<sup>-1</sup>, 2825. cm<sup>-1</sup>,  $\nu(\text{C=O})_{\text{carbamate}} = 1732$  cm<sup>-1</sup>,  $\nu(\text{C=O})_{\text{lactam}} = 1702$  cm<sup>-1</sup>,  $\nu(\text{C=N}) = 1653$  cm<sup>-1</sup>,  $\nu(\text{C=C}) = 1631$  cm<sup>-1</sup>, 1615 cm<sup>-1</sup>,  $\delta(\text{N-H}) = 1532$  cm<sup>-1</sup>,  $\delta(\text{N-H})_{\text{carbamate}} = 1481$  cm<sup>-1</sup>,  $\nu(\text{C-N})_{\text{carbamate}} = 1393$  cm<sup>-1</sup>,  $\nu(\text{C-O-C})_{\text{carbamate}} = 1176$  cm<sup>-1</sup>,  $\nu(\text{C-O-C}) = 1107$  cm<sup>-1</sup>,  $\nu(\text{C-O-C})_{\text{methoxy}} = 1060$  cm<sup>-1</sup>,  $\gamma(\text{C-H})_{\text{ar}} = 765$  cm<sup>-1</sup>. <sup>1</sup>H NMR (500 MHz, DMSO- $d_6$ +ACN- $d_3$ )  $\delta$  9.32 (s, 1H, NH-1), 8.34 (s, 1H, OH-21), 7.16 (s, 1H, H-19), 6.45 (s, 1H, NH2-24), 6.30 (t,  $J^3_{\text{H-3,H-4}} = 11.4$  Hz, 1H, H-4), 6.26 (s, 1H, NH<sub>2</sub>-24), 6.01 (d,  $J^3_{\text{H-3,H-4}} = 11.2$  Hz, 1H, H-3), 4.98 – 4.87 (m, 2H, H-5,9), 4.72 (d,  $J^3_{\text{H-6,H-7}} = 9.6$  Hz, 1H, H-7), 4.16 (d, 1H,  $J^3_{\text{HO,H-11}} = 3.5$  Hz, OH-11), 3.76 (t,  $J^3_{\text{H-6,H-7}} = 10.1$  Hz, 1H, H-6), 3.45 (m, 1H, H-11), 3.18 (s, 3H, H-27), 3.02 (dd,  $J^2 = 13.3$  Hz,  $J^3_{\text{H-15,H-14}} = 5.2$  Hz, 1H, H-15), 2.95 (s, 3H, H-23), 2.91-2.76\* (m, 3H, H-15, H-30), 2.68 – 2.63 (m, 1H, H-12), 2.19 – 2.02 (m, 1H, H-14), 1.95 (s, 3H, H-22), 1.87 – 1.82 (m, 1H, H-10), 1.82 – 1.74 (m, 2H, H-31), 1.56 – 1.49 (m, 1H, H-13), 1.04 (t,  $J^3_{\text{H-31,H-32}} = 7.4$  Hz, 2H, H-32), 0.80 (d,  $J^3_{\text{H-10,H-26}} = 6.3$  Hz, 3H, H-26), 0.70 (d,  $J^3_{\text{H-14,H-28}} = 7.0$  Hz, 3H, H-28), 0.46 – 0.40 (m, 1H, H-13), 0.39 (s, 3H, H-25).  $^{13}\text{C}\{^1\text{H}\}$  NMR (126 MHz, DMSO- $d_6$ + ACN- $d_3$ )  $\delta$  174.2 (C-1), 166.5 (C-29), 156.6 (C-24), 147.3 (C-21), 144.1 (C-18), 139.9 (C-17), 135.8 (C-2), 134.0 (C-9), 129.8 (C-4), 129.3 (C-8), 127.6 (C-5), 126.7 (C-20), 123.2 (C-3), 118.8 (C-16), 104.2 (C-19), 80.6 (C-7), 79.9 (C-12), 74.7 (C-6), 71.4 (C-11), 55.8 (C-27), 55.3 (C-23), 34.9 (C-10), 31.5 (C-15), 30.8 (C-13), 30.5 (C-14), 30.2 (C-30), 21.0 (C-31), 18.8 (C-26), 16.8 (C-28), 13.9\* (C-22, C-32), 10.1 (C-25). (\*-overlapped)

**Compound 14a.** (4*E*,6*Z*,8*S*,9*S*,10*E*,12*S*,13*R*,14*S*,16*R*)-1<sup>5</sup>,13-dihydroxy-8,14-dimethoxy-4,10,12,16-tetramethyl-3-oxo-1<sup>2</sup>-vinyl-2-aza-1(6,4)-benzo[*d*]oxazolacycloheptadecaphane-4,6,10-trien-9-yl carbamate (73 mg, yield 70 %), HPLC (OD-H, water/acetonitrile = 55/45, flow rate = 0.75 mL/min,  $\lambda = 260$  nm) tR = 1.672 min (major). Anal. Calcd for C<sub>31</sub>H<sub>41</sub>N<sub>3</sub>O<sub>8</sub>: C, 63.79; H, 7.08; N, 7.20; Found: C, 63.84; H, 7.04; N, 7.22. HRMS (MALDI-TOF) m/z: [M + H]<sup>+</sup> Calcd for C<sub>31</sub>H<sub>42</sub>N<sub>3</sub>O<sub>8</sub> 584.2966; Found 584.2970. FT-IR (KBr):  $\nu_{\text{as}}(\text{N-H})_{\text{carbamate}} = 3446$  cm<sup>-1</sup>,  $\nu_{\text{s}}(\text{N-H})_{\text{carbamate}} = 3394$  cm<sup>-1</sup>,  $\nu(\text{N-H})_{\text{lactam}} = 3335$  cm<sup>-1</sup>,  $\nu(\text{O-H})_{\text{phenol}} = 3295$  cm<sup>-1</sup>,  $\nu(\text{O-H}) = 3181$  cm<sup>-1</sup>,  $\nu_{\text{as}}(\text{C-H}) = 2962$  cm<sup>-1</sup>, 2927 cm<sup>-1</sup>,  $\nu_{\text{s}}(\text{C-H}) = 2823$ . cm<sup>-1</sup>,  $\nu(\text{C=O})_{\text{carbamate}} = 1731$  cm<sup>-1</sup>,  $\nu(\text{C=O})_{\text{lactam}} = 1700$  cm<sup>-1</sup>,  $\nu(\text{C=N}) = 1647$  cm<sup>-1</sup>,  $\nu(\text{C=C}) = 1647$  cm<sup>-1</sup>, 1613 cm<sup>-1</sup>,  $\delta(\text{N-H}) = 1532$  cm<sup>-1</sup>,  $\delta(\text{N-H})_{\text{carbamate}} = 1480$  cm<sup>-1</sup>,  $\nu(\text{C-N})_{\text{carbamate}} = 1378$  cm<sup>-1</sup>,  $\nu(\text{C-O-C})_{\text{carbamate}} = 1178$  cm<sup>-1</sup>,  $\nu(\text{C-O-C}) = 1113$  cm<sup>-1</sup>,  $\nu(\text{C-O-C})_{\text{methoxy}} = 1062$  cm<sup>-1</sup>,  $\gamma(\text{C-H}) = 879$  cm<sup>-1</sup>, 783 cm<sup>-1</sup>,  $\gamma(\text{C-H})_{\text{ar}} = 766$  cm<sup>-1</sup>. <sup>1</sup>H NMR (500 MHz, DMSO- $d_6$ +ACN- $d_3$ )  $\delta$  9.42 (s, 1H, NH-1), 8.48 (s, 1H, OH-21), 7.23 (s, 1H, H-19), 6.81 (dd,  $J^3_{\text{H-30,H-31-trans}} = 17.5$  Hz,  $J^3_{\text{H-30,H-31-cis}} = 11.1$  Hz, 1H, H-30), 6.46 (s, 1H, NH<sub>2</sub>-24), 6.32 (d,  $J^3_{\text{H-30,H-31-trans}} = 17.5$  Hz, 1H, H-31<sub>trans</sub>), 6.30 (t,  $J^3_{\text{H-3,H-4}} = 11.5$  Hz, 1H, H-4), 6.27 (s, 1H, NH<sub>2</sub>-24), 6.01 (d,  $J^3_{\text{H-3,H-4}} = 11.6$  Hz, 1H, H-3), 5.87 (d,  $J^3_{\text{H-30,H-31-cis}} = 11.4$  Hz, 1H, H-31<sub>trans</sub>), 4.97 – 4.90 (m, 2H, H-5,9), 4.71 (d,  $J^3_{\text{H-6,H-7}} = 9.6$  Hz, 1H, H-7), 4.22 (s, 1H, OH-11), 3.74 (t,  $J^3_{\text{H-6,H-7}} = 10.1$  Hz, 1H, H-6), 3.45-3.41 (m, 1H, H-11), 3.27-3.19 (m, 1H, H-15), 3.18 (s, 3H, H-27), 3.07-3.01 (m, 1H, H-15), 2.96 (s, 3H, H-23), 2.87-2.84 (m, 1H, H-15), 2.68-2.62 (m, 1H, H-12), 2.25 – 2.12 (m, 1H, H-14), 1.95 (s, 3H, H-22), 1.83-1.76 (m, 1H, H-10), 1.57 – 1.50 (m, 1H, H-13), 0.78 (d,  $J^3_{\text{H-10,H-26}} = 6.7$  Hz, 3H, H-26), 0.71 (d,  $J^3_{\text{H-14,H-28}} = 6.9$  Hz, 3H, H-28), 0.48 – 0.40 (m, 1H, H-13), 0.36 (s, 3H, H-25).  $^{13}\text{C}\{^1\text{H}\}$  NMR (126 MHz, DMSO- $d_6$ + ACN- $d_3$ )  $\delta$  174.1 (C-1), 161.5(C-29), 156.5 (C-24), 147.9 (C-21), 143.7(C-18), 140.4 (C-17), 135.7 (C-2), 133.9 (C-9), 129.8 (C-4), 129.1 (C-8), 128.0 (C-5), 127.6 (C-20), 125.0 (C-30), 124.2 (C-31), 123.3 (C-3), 119.3 (C-16), 104.5 (C-19), 80.6 (C-7), 79.9 (C-12), 74.5 (C-6), 71.4 (C-11), 55.8 (C-27), 55.3 (C-23), 34.8 (C-10), 31.4 (C-15), 30.8 (C-13), 30.5 (C-14), 29.7 (C-30), 19.0 (C-26), 16.7 (C-28), 13.9 (C-22), 9.8 (C-25). (\*-overlapped)

**Compound 15a.** (4*E*,6*Z*,8*S*,9*S*,10*E*,12*S*,13*R*,14*S*,16*R*)-1<sup>2</sup>-ethynyl-1<sup>5</sup>,13-dihydroxy-8,14-dimethoxy-4,10,12,16-tetramethyl-3-oxo-2-aza-1(6,4)-benzo[*d*]oxazolacycloheptadecaphane-4,6,10-trien-9-yl carbamate (70 mg, yield



67 %) mp 249-254 °C, HPLC (OD-H, water/acetonitrile = 55/45, flow rate = 0.75 mL/min, l = 260 nm) tR = 1.985 min (major). Anal. Calcd for C<sub>31</sub>H<sub>39</sub>N<sub>3</sub>O<sub>8</sub>: C, 64.01; H, 6.76; N, 7.22; Found: C, 63.98; H, 6.78; N, 7.20. HRMS (MALDI-TOF) m/z: [M + H]<sup>+</sup> Calcd for C<sub>31</sub>H<sub>40</sub>N<sub>3</sub>O<sub>8</sub> 582.2810; Found 582.2814. FT-IR (KBr): ν<sub>as</sub>(N-H)<sub>carbamate</sub> = 3443 cm<sup>-1</sup>, ν<sub>s</sub>(N-H)<sub>carbamate</sub> = 3398 cm<sup>-1</sup>, ν(N-H)<sub>lactam</sub> = 3315 cm<sup>-1</sup>, ν(O-H)<sub>phenol</sub> = 3301 cm<sup>-1</sup>, ν(O-H) = 3199 cm<sup>-1</sup>, ν<sub>as</sub>(C-H) = 2960 cm<sup>-1</sup>, 2927 cm<sup>-1</sup>, ν<sub>s</sub>(C-H) = 2824. cm<sup>-1</sup>, ν(C≡C) = 2122 cm<sup>-1</sup>, ν(C=O)<sub>carbamate</sub> = 1731 cm<sup>-1</sup>, ν(C=O)<sub>lactam</sub> = 1700 cm<sup>-1</sup>, ν(C=N) = 1657 cm<sup>-1</sup>, ν(C=C) = 1649 cm<sup>-1</sup>, 1621 cm<sup>-1</sup>, δ(N-H) = 1527 cm<sup>-1</sup>, δ(N-H)<sub>carbamate</sub> = 1482 cm<sup>-1</sup>, ν(C-N)<sub>carbamate</sub> = 1376 cm<sup>-1</sup>, ν(C-O-C)<sub>carbamate</sub> = 1190 cm<sup>-1</sup>, ν(C-O-C) = 1113 cm<sup>-1</sup>, ν(C-O-C)<sub>methoxy</sub> = 1059 cm<sup>-1</sup>, γ(=C-H) = 877 cm<sup>-1</sup>, 783 cm<sup>-1</sup>, γ(H-C≡C) = 632 cm<sup>-1</sup>. <sup>1</sup>H NMR (500 MHz, DMSO-*d*<sub>6</sub>+ACN-*d*<sub>3</sub>) δ 9.52 (s, 1H, NH-1), 8.68 (s, 1H, OH-21), 7.26 (s, 1H, H-19), 6.45 (s, 1H, NH<sub>2</sub>-24), 6.31-6.27 (m, 2H, H-4, NH<sub>2</sub>-24), 6.00 (d, *J*<sub>H-3,H-4</sub> = 11.4 Hz, 1H, H-3), 4.99 – 4.88 (m, 2H, H-5,9), 4.87 (s, 1H, H-31), 4.72 (d, *J*<sub>H-6,H-7</sub> = 9.9 Hz, 1H, H-7), 4.30 (d, *J*<sub>H-11,OH</sub> = 3.1 Hz, 1H, OH-11), 3.74 (t, *J*<sub>H-6,H-7</sub> = 10.3 Hz, 1H, H-6), 3.45-3.41 (m, 1H, H-11), 3.30-3.22 (m, 1H, H-15), 3.17 (s, 3H, H-27), 3.07-3.01 (dd, *J*<sup>2</sup> = 14.1 Hz, *J*<sub>H-15,H-14</sub> = 5.0 Hz, 1H, H-15), 2.96 (s, 3H, H-23), 2.88-2.81 (m, 1H, H-15), 2.64-2.60 (m, 1H, H-12), 2.21 – 2.11 (m, 1H, H-14), 1.94 (s, 3H, H-22), 1.86-1.77 (m, 1H, H-10), 1.59 – 1.49 (m, 1H, H-13), 0.78 (d, *J*<sub>H-10,H-26</sub> = 6.7 Hz, 3H, H-26), 0.83 (d, *J*<sub>H-14,H-28</sub> = 6.4 Hz, 3H, H-28), 0.42 – 0.36 (m, 1H, H-13), 0.35 (s, 3H, H-25). <sup>13</sup>C{<sup>1</sup>H} NMR (126 MHz, DMSO-*d*<sub>6</sub>+ ACN-*d*<sub>3</sub>) δ 174.0 (C-1), 156.5 (C-24), 148.6 (C-21), 145.6 (C-29), 143.7 (C-18), 138.9 (C-17), 135.8 (C-2), 133.9 (C-9), 129.8 (C-4), 129.6 (C-8), 129.0 (C-5), 127.7 (C-20), 123.6 (C-3), 119.3 (C-16), 104.5 (C-19), 85.5 (C-31), 80.5 (C-7), 79.7 (C-12), 74.4 (C-6), 71.9 (C-11), 71.2 (C-30), 55.8 (C-27), 55.3 (C-23), 34.9 (C-10), 31.3 (C-15), 30.9 (C-13), 30.5 (C-14), 30.5 (C-30), 19.0 (C-26), 16.4 (C-28), 13.9 (C-22), 9.7 (C-25). (\*-overlapped)

**Compound 16a.** (4*E*,6*Z*,8*S*,9*S*,10*E*,12*S*,13*R*,14*S*,16*R*)-15,13-dihydroxy-8,14-dimethoxy-4,10,12,16-tetramethyl-3-oxo-12-(pyridine-4-yl)-2-aza-1(6,4)-benzo[d]oxazolacycloheptadecaphane-4,6,10-trien-9-yl carbamate (76 mg, yield 67 %), HPLC (OD-H, water/acetonitrile = 55/45, flow rate = 0.75 mL/min, l = 260 nm) tR = 1.812 min (major). Anal. Calcd for C<sub>34</sub>H<sub>43</sub>N<sub>4</sub>O<sub>8</sub>: C, 64.34; H, 6.67; N, 8.83; Found: C, 64.37; H, 6.63; N, 8.82. HRMS (MALDI-TOF) m/z: [M + H]<sup>+</sup> Calcd for C<sub>34</sub>H<sub>43</sub>N<sub>4</sub>O<sub>8</sub> 635.3075; Found 635.3071. FT-IR (KBr): ν<sub>as</sub>(N-H)<sub>carbamate</sub> = 3428 cm<sup>-1</sup>, ν<sub>s</sub>(N-H)<sub>carbamate</sub> = 3378 cm<sup>-1</sup>, ν(N-H)<sub>lactam</sub> = 3315 cm<sup>-1</sup>, ν(O-H)<sub>phenol</sub> = 3003 cm<sup>-1</sup>, ν(O-H) = 3209 cm<sup>-1</sup>, ν(C-H)<sub>pyridine</sub> = 3114 cm<sup>-1</sup>, ν(C-H)<sub>pyridine</sub> = 3044 cm<sup>-1</sup>, ν<sub>s</sub>(C-H) = 2900 cm<sup>-1</sup>, ν<sub>s</sub>(C-H) = 2874. cm<sup>-1</sup>, 2824. cm<sup>-1</sup>, ν(C=O)<sub>carbamate</sub> = 1731 cm<sup>-1</sup>, ν(C=O)<sub>lactam</sub> = 1701 cm<sup>-1</sup>, ν(C=N) + ν(C=C)<sub>pyridine</sub> = 1643 cm<sup>-1</sup>, ν(C=C) = 1630 cm<sup>-1</sup>, δ(N-H) = 1531 cm<sup>-1</sup>, δ(N-H)<sub>carbamate</sub> = 1484 cm<sup>-1</sup>, ν(C-N)<sub>carbamate</sub> = 1381 cm<sup>-1</sup>, ν(C-O-C)<sub>carbamate</sub> = 1195 cm<sup>-1</sup>, ν(C-O-C) = 1103 cm<sup>-1</sup>, ν(C-O-C)<sub>methoxy</sub> = 1056 cm<sup>-1</sup>, γ(=C-H)<sub>ar</sub> = 765 cm<sup>-1</sup>. <sup>1</sup>H NMR (500 MHz, DMSO-*d*<sub>6</sub>+ACN-*d*<sub>3</sub>) δ 9.53 (s, 1H, NH-1), 8.82 (d, *J*<sub>H-31,H-32 (H-33,H-34)</sub> = 5.9 Hz, 2H, H-32,33), 8.68 (s, 1H, OH-21), 8.02 (d, *J*<sub>H-31,H-32 (H-33,H-34)</sub> = 5.9 Hz, 2H, H-31,34), 7.36 (s, 1H, H-19), 6.39 (s, 1H, NH<sub>2</sub>-24), 6.30 (t, *J*<sub>H-3,H-4</sub> = 11.4 Hz, 1H, H-4), 6.23 (s, 1H, NH<sub>2</sub>-24), 6.02 (d, *J*<sub>H-3,H-4</sub> = 12.7 Hz, 1H, H-3), 5.04 – 4.83 (m, 2H, H-5,9), 4.67 (d, *J*<sub>H-6,H-7</sub> = 9.7 Hz, 1H, H-7), 4.23 (s, 1H, OH-11), 3.73 (t, *J*<sub>H-6,H-7</sub> = 10.3 Hz, 1H, H-6), 3.25 (m, 1H, H-11), 3.19 (s, 3H, H-27), 3.15-3.08 (m, 1H, H-15), 2.95 (s, 3H, H-23), 2.94-2.72 (m, 1H, H-15), 2.70 – 2.62 (m, 1H, H-12), 2.30 – 2.19 (m, 1H, H-14), 1.96 (s, 3H, H-22), 1.76 – 1.65 (m, 2H, H-10,13), 0.73 (d, *J*<sub>H-10,H-26</sub> = 6.7 Hz, 3H, H-26), 0.61 (d, *J*<sub>H-14,H-28</sub> = 6.7 Hz, 3H, H-28), 0.50 – 0.41 (m, 1H, H-13), 0.29 (s, 3H, H-25). <sup>13</sup>C{<sup>1</sup>H} NMR (126 MHz, DMSO-*d*<sub>6</sub>+ ACN-*d*<sub>3</sub>) δ 174.0 (C-1), 160.0 (C-29), 156.4 (C-24), 151.3 (C-32,33), 148.3 (C-21), 144.5 (C-18), 140.4 (C-17), 135.8 (C-2), 134.4 (C-30), 133.8 (C-9), 129.8 (C-4), 128.9 (C-8), 127.7 (C-5), 123.5 (C-20), 123.3 (C-3), 120.7 (C-31,34), 119.5 (C-16), 105.0 (C-19), 80.4 (C-7), 79.8 (C-12), 74.5 (C-6), 71.4 (C-11), 55.9 (C-27), 55.3 (C-23), 34.9 (C-10), 31.5 (C-15), 31.2 (C-13), 30.4 (C-14), 29.8 (C-30), 18.6 (C-26), 16.7 (C-28), 13.9 (C-22), 9.7 (C-25). (\*-overlapped)

**Table S1** Cyclization reaction tests, presented for the amine derivative of **GDM**, which in position C(17) contains an aminobenzyl substituent, leading to the formation of an oxazole ring using various organic and inorganic bases as catalysts, and carried out in various solvents.

|                                                                                                    | time of reaction (h) / yield of reaction (%) / conversion of substrate (%) |                                        |                                          |                                               |                                               |
|----------------------------------------------------------------------------------------------------|----------------------------------------------------------------------------|----------------------------------------|------------------------------------------|-----------------------------------------------|-----------------------------------------------|
|                                                                                                    | DMF                                                                        | THF                                    | ACN                                      | Acetone                                       | DMSO                                          |
| NaH                                                                                                | 0.5 / 40 / 62<br>1.5 / 51 / 72<br>24 / 64 / 90                             | ---                                    | ---                                      | ---                                           | ---                                           |
| K <sub>2</sub> CO <sub>3</sub>                                                                     | 0.5 / 35 / 59<br>1 / 60 / 83<br>1.5 / 74 / >99                             | 1 / 1 / 7<br>4 / 2 / 8<br>24 / 10 / 29 | 0.5 / 1 / 5<br>1 / 2 / 6<br>24 / 21 / 29 | 1 / 10 / 17<br>4 / 33 / 42<br>24 / 70 / 85    | 0.5 / 58 / 99<br>1 / 62 / >99                 |
| 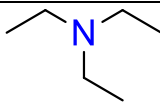<br>TEA           | 22 / 21 / 27<br>96 / 43 / 50                                               | ---                                    | ---                                      | ---                                           | ---                                           |
| <br>Quinuclidine | 0.5 / 3 / 95<br>1 / 5 / 92<br>2 / 8 / 90<br>19 / 25 / 70<br>24 / 28 / 53   | ---                                    | ---                                      | ---                                           | ---                                           |
| <br>DMAP        | 22 / 11 / 19<br>96 / 27 / 36                                               | ---                                    | ---                                      | ---                                           | ---                                           |
| <br>TMG         | 0.5 / 70 / >99<br>1 / 71 / >99                                             | 1 / 29 / 38<br>5 / 64 / 75             | 1 / 46 / 58<br>2 / 67 / 81               | 0.5 / 56 / 71<br>1 / 70 / 86<br>1.5 / 89 / 97 | 0.5 / 68 / 99<br>1 / 68 / >99                 |
| <br>DBU         | 0.5 / 64 / 83<br>1 / 70 / 95                                               | ---                                    | ---                                      | ---                                           | ---                                           |
| <br>TMGN        | 0.5 / 55 / 89<br>1 / 65 / 98                                               | 1 / 4 / 19<br>2 / 4 / 19               | ---                                      | 0.5 / 54 / 72<br>1 / 67 / 82<br>2 / 76 / 92   | 0.5 / 51 / 81<br>1 / 63 / 94<br>1.5 / 67 / 98 |
|                 | 1.5 / 75 / 88                                                              | ---                                    | ---                                      | 0.5 / 55 / 74<br>1 / 57 / 76<br>2 / 60 / 78   | 0.5 / 82 / 94<br>1 / 87 / >99                 |

|                                                                                              |                                |     |     |     |     |
|----------------------------------------------------------------------------------------------|--------------------------------|-----|-----|-----|-----|
| TBD                                                                                          |                                |     |     |     |     |
| 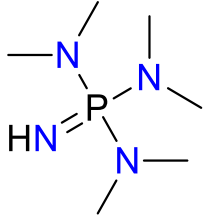<br>$P_1-H$ | 0.5 / 80 / >99<br>1 / 80 / >99 | --- | --- | --- | --- |

**Table S2** Cyclization reaction tests, presented for the amine derivatives (**1-12**) of **GDM**, leading to the formation of an oxazole ring using TMG as catalysts, and carried out in DMF (0°C).

|           | Conversion of substrate [%]/ yield of product [%] |        |        |        |        |        |        |
|-----------|---------------------------------------------------|--------|--------|--------|--------|--------|--------|
|           | 10 min                                            | 20 min | 30 min | 40 min | 50 min | 60 min | 80 min |
| <b>1</b>  | 50/43                                             | 68/58  | 77/69  | 83/72  | 88/79  | 91/81  | 94/88  |
| <b>2</b>  | 51/36                                             | 69/52  | 81/67  | 87/76  | 90/80  | 92/84  | 96/87  |
| <b>3</b>  | 74/63                                             | 88/73  | 95/83  | 97/86  | 98/87  | 99/89  | >99/90 |
| <b>4</b>  | 73/37                                             | 87/58  | 93/63  | 96/76  | 98/74  | 98/79  | 99/75  |
| <b>6</b>  | 72/57                                             | 90/62  | 96/81  | 98/76  | 99/81  | 99/82  | 100/90 |
| <b>7</b>  | 63/49                                             | 85/71  | 93/81  | 96/83  | 98/86  | 99/87  | 100/91 |
| <b>8</b>  | 91/77                                             | 98/83  | 99/83  | 99/84  | 99/85  | 99/85  | 99/85  |
| <b>9</b>  | 95/80                                             | 99/86  | 99/87  | 99/87  | 99/87  | 99/87  | 99/87  |
| <b>10</b> | 35/27                                             | 56/41  | 69/56  | 78/62  | 83/72  | 87/74  | 91/80  |
| <b>11</b> | 46/39                                             | 59/51  | 72/60  | 79/70  | 85/75  | 89/74  | 93/80  |
| <b>12</b> | 39/32                                             | 54/44  | 61/50  | 70/58  | 82/69  | 88/73  | 95/78  |

**Table S3** Crystal data and refinement details

| Compound                                     | <b>1a</b>                                                                                                         | <b>2a</b>                                                                                                          | <b>10a</b>                                                                                         | <b>3a</b>                                                                                            | <b>4a</b>                                                                                            | <b>5a</b>                                                      |
|----------------------------------------------|-------------------------------------------------------------------------------------------------------------------|--------------------------------------------------------------------------------------------------------------------|----------------------------------------------------------------------------------------------------|------------------------------------------------------------------------------------------------------|------------------------------------------------------------------------------------------------------|----------------------------------------------------------------|
| empirical formula                            | C <sub>35</sub> H <sub>43</sub> N <sub>3</sub> O <sub>8</sub> ·<br>(C <sub>3</sub> H <sub>8</sub> O) <sub>2</sub> | C <sub>35</sub> H <sub>42</sub> FN <sub>3</sub> O <sub>8</sub> ·<br>(C <sub>3</sub> H <sub>8</sub> O) <sub>2</sub> | C <sub>36</sub> H <sub>45</sub> N <sub>3</sub> O <sub>8</sub> ·<br>C <sub>3</sub> H <sub>8</sub> O | C <sub>35</sub> H <sub>42</sub> ClN <sub>3</sub> O <sub>8</sub> ·<br>C <sub>3</sub> H <sub>8</sub> O | C <sub>35</sub> H <sub>42</sub> BrN <sub>3</sub> O <sub>8</sub> ·<br>C <sub>3</sub> H <sub>8</sub> O | C <sub>35</sub> H <sub>42</sub> IN <sub>3</sub> O <sub>8</sub> |
| CCDC no.                                     | 2155685                                                                                                           | 2155686                                                                                                            | 2155693                                                                                            | 2155687                                                                                              | 2155688                                                                                              | 2245620                                                        |
| formula weight                               | 753.91                                                                                                            | 771.90                                                                                                             | 707.84                                                                                             | 728.26                                                                                               | 772.72                                                                                               | 759.42                                                         |
| crystal system                               | Monoclinic                                                                                                        | Monoclinic                                                                                                         | Monoclinic                                                                                         | Monoclinic                                                                                           | Monoclinic                                                                                           | Monoclinic                                                     |
| space group                                  | <i>P</i> 2 <sub>1</sub>                                                                                           | <i>P</i> 2 <sub>1</sub>                                                                                            | <i>P</i> 2 <sub>1</sub>                                                                            | <i>P</i> 2 <sub>1</sub>                                                                              | <i>P</i> 2 <sub>1</sub>                                                                              | <i>P</i> 2 <sub>1</sub>                                        |
| <i>a</i> (Å)                                 | 14.2947(3)                                                                                                        | 14.2162(2)                                                                                                         | 15.3464(4)                                                                                         | 15.3943(4)                                                                                           | 15.3999(3)                                                                                           | 15.3830(14)                                                    |
| <i>b</i> (Å)                                 | 7.65370(15)                                                                                                       | 7.63320(12)                                                                                                        | 7.6850(2)                                                                                          | 7.68493(17)                                                                                          | 7.69141(10)                                                                                          | 7.5875(11)                                                     |
| <i>c</i> (Å)                                 | 18.5012(3)                                                                                                        | 18.6354(3)                                                                                                         | 16.6105(5)                                                                                         | 16.6460(4)                                                                                           | 16.6762(3)                                                                                           | 16.7894(14)                                                    |
| β (°)                                        | 90.5720(17)                                                                                                       | 90.7489(14)                                                                                                        | 108.399(3)                                                                                         | 108.905(3)                                                                                           | 108.5909(17)                                                                                         | 108.429(10)                                                    |
| volume (Å <sup>3</sup> )                     | 2024.05(6)                                                                                                        | 2022.04(5)                                                                                                         | 1858.85(9)                                                                                         | 1863.07(8)                                                                                           | 1872.18(5)                                                                                           | 1859.1(4)                                                      |
| <i>Z</i>                                     | 2                                                                                                                 | 2                                                                                                                  | 2                                                                                                  | 2                                                                                                    | 2                                                                                                    | 2                                                              |
| temperature (K)                              | 130                                                                                                               | 130                                                                                                                | 130                                                                                                | 130                                                                                                  | 130                                                                                                  | 130                                                            |
| radiation type                               | Cu <i>K</i> α                                                                                                     | Cu <i>K</i> α                                                                                                      | Cu <i>K</i> α                                                                                      | Cu <i>K</i> α                                                                                        | Cu <i>K</i> α                                                                                        | Cu <i>K</i> α                                                  |
| μ (mm <sup>-1</sup> )                        | 0.720                                                                                                             | 0.770                                                                                                              | 0.731                                                                                              | 1.390                                                                                                | 1.977                                                                                                | 7.189                                                          |
| refl. collected, unique                      | 23906, 6666                                                                                                       | 30320, 8211                                                                                                        | 9878, 5633                                                                                         | 17085, 6185                                                                                          | 16673, 6169                                                                                          | 8241, 4770                                                     |
| restrains/parameters                         | 1/517                                                                                                             | 1/534                                                                                                              | 890/539                                                                                            | 878/550                                                                                              | 877/539                                                                                              | 88/501                                                         |
| GOF on F <sup>2</sup>                        | 1.053                                                                                                             | 1.039                                                                                                              | 1.063                                                                                              | 1.053                                                                                                | 1.042                                                                                                | 1.010                                                          |
| R <sub>1</sub> [ <i>I</i> >2σ( <i>I</i> )]   | 0.0412                                                                                                            | 0.0315                                                                                                             | 0.0593                                                                                             | 0.0451                                                                                               | 0.0677                                                                                               | 0.0837                                                         |
| wR <sub>2</sub> [ <i>I</i> >2 σ( <i>I</i> )] | 0.0832                                                                                                            | 0.0804                                                                                                             | 0.1604                                                                                             | 0.1324                                                                                               | 0.1955                                                                                               | 0.2053                                                         |
| R <sub>1</sub> (all data)                    | 0.0564                                                                                                            | 0.0339                                                                                                             | 0.0662                                                                                             | 0.0483                                                                                               | 0.0702                                                                                               | 0.1340                                                         |
| wR <sub>2</sub> (all data)                   | 0.0919                                                                                                            | 0.0822                                                                                                             | 0.1680                                                                                             | 0.1358                                                                                               | 0.2042                                                                                               | 0.2683                                                         |
| largest pick and hole (e Å <sup>-3</sup> )   | 0.17, -0.17                                                                                                       | 0.16, -0.14                                                                                                        | 0.23, -0.54                                                                                        | 0.29, -0.58                                                                                          | 0.74, -0.98                                                                                          | 0.41/-0.69                                                     |

| Compound                                     | <b>7a</b>                                                                    | <b>11a</b>                                                                                                       | <b>6a</b>                                                                                                                       | <b>9a</b>                                                                                                         | <b>8a</b>                                                                                      |
|----------------------------------------------|------------------------------------------------------------------------------|------------------------------------------------------------------------------------------------------------------|---------------------------------------------------------------------------------------------------------------------------------|-------------------------------------------------------------------------------------------------------------------|------------------------------------------------------------------------------------------------|
| empirical formula                            | C <sub>36</sub> H <sub>42</sub> F <sub>3</sub> N <sub>3</sub> O <sub>9</sub> | C <sub>36</sub> H <sub>45</sub> N <sub>3</sub> O <sub>9</sub> ·(C <sub>3</sub> H <sub>8</sub> O) <sub>0.85</sub> | C <sub>36</sub> H <sub>42</sub> F <sub>3</sub> N <sub>3</sub> O <sub>8</sub> ·(C <sub>3</sub> H <sub>8</sub> O) <sub>0.46</sub> | C <sub>35</sub> H <sub>42</sub> N <sub>4</sub> O <sub>10</sub> ·(C <sub>3</sub> H <sub>8</sub> O) <sub>0.70</sub> | C <sub>36</sub> H <sub>42</sub> N <sub>4</sub> O <sub>8</sub> ·C <sub>3</sub> H <sub>8</sub> O |
| CCDC no.                                     | 2155690                                                                      | 2155694                                                                                                          | 2155689                                                                                                                         | 2155692                                                                                                           | 2155691                                                                                        |
| formula weight                               | 717.50                                                                       | 713.74                                                                                                           | 729.29                                                                                                                          | 720.79                                                                                                            | 718.83                                                                                         |
| crystal system                               | Monoclinic                                                                   | Monoclinic                                                                                                       | Monoclinic                                                                                                                      | Monoclinic                                                                                                        | Monoclinic                                                                                     |
| space group                                  | <i>P</i> 2 <sub>1</sub>                                                      | <i>P</i> 2 <sub>1</sub>                                                                                          | <i>P</i> 2 <sub>1</sub>                                                                                                         | <i>P</i> 2 <sub>1</sub>                                                                                           | <i>P</i> 2 <sub>1</sub>                                                                        |
| <i>a</i> (Å)                                 | 15.3405(3)                                                                   | 15.3941(4)                                                                                                       | 15.4812(6)                                                                                                                      | 15.4049(6)                                                                                                        | 15.2943(4)                                                                                     |
| <i>b</i> (Å)                                 | 7.68484(14)                                                                  | 7.6808(2)                                                                                                        | 7.6792(3)                                                                                                                       | 7.6636(4)                                                                                                         | 7.70332(19)                                                                                    |
| <i>c</i> (Å)                                 | 16.9699(4)                                                                   | 17.1009(5)                                                                                                       | 16.8804(5)                                                                                                                      | 17.0079(9)                                                                                                        | 16.8756(5)                                                                                     |
| β (°)                                        | 109.018(2)                                                                   | 109.763(3)                                                                                                       | 109.424(4)                                                                                                                      | 109.189(5)                                                                                                        | 108.751(3)                                                                                     |
| volume (Å <sup>3</sup> )                     | 1891.37(7)                                                                   | 1902.90(10)                                                                                                      | 1892.57(12)                                                                                                                     | 1896.34(17)                                                                                                       | 1882.72(10)                                                                                    |
| <i>Z</i>                                     | 2                                                                            | 2                                                                                                                | 2                                                                                                                               | 2                                                                                                                 | 2                                                                                              |
| temperature (K)                              | 130                                                                          | 130                                                                                                              | 130                                                                                                                             | 130                                                                                                               | 130                                                                                            |
| radiation type                               | Cu <i>K</i> α                                                                | Cu <i>K</i> α                                                                                                    | Cu <i>K</i> α                                                                                                                   | Cu <i>K</i> α                                                                                                     | Cu <i>K</i> α                                                                                  |
| μ (mm <sup>-1</sup> )                        | 0.847                                                                        | 0.737                                                                                                            | 0.843                                                                                                                           | 0.771                                                                                                             | 0.740                                                                                          |
| refl. collected, unique                      | 17243, 6470                                                                  | 17925, 6498                                                                                                      | 18512, 6535                                                                                                                     | 10963, 5965                                                                                                       | 17744, 6021                                                                                    |
| restraints/parameters                        | 1061/665                                                                     | 399/446                                                                                                          | 1131/598                                                                                                                        | 897/547                                                                                                           | 14/504                                                                                         |
| GOF on F <sup>2</sup>                        | 1.040                                                                        | 1.037                                                                                                            | 1.036                                                                                                                           | 1.038                                                                                                             | 1.065                                                                                          |
| R <sub>1</sub> [ <i>I</i> >2σ ( <i>I</i> )]  | 0.0551                                                                       | 0.0558                                                                                                           | 0.0763                                                                                                                          | 0.0798                                                                                                            | 0.0396                                                                                         |
| wR <sub>2</sub> [ <i>I</i> >2σ ( <i>I</i> )] | 0.1571                                                                       | 0.1472                                                                                                           | 0.2054                                                                                                                          | 0.2083                                                                                                            | 0.1096                                                                                         |
| R <sub>1</sub> (all data)                    | 0.0589                                                                       | 0.0623                                                                                                           | 0.0937                                                                                                                          | 0.1044                                                                                                            | 0.0419                                                                                         |
| wR <sub>2</sub> (all data)                   | 0.1641                                                                       | 0.1537                                                                                                           | 0.2225                                                                                                                          | 0.2271                                                                                                            | 0.1129                                                                                         |
| largest pick and hole (e Å <sup>-3</sup> )   | 0.36, -0.23                                                                  | 0.55, -0.50                                                                                                      | 0.85, -0.42                                                                                                                     | 0.43, -0.35                                                                                                       | 0.25, -0.30                                                                                    |

**Table S4** Comparison of biological activity between **GDM**, benzoxazole (**1a-12a**) and C(17)-amine derivatives (**1-12**) in cancer cell lines (SKBR-3, SKOV-3, PC-3) and in healthy cell line (HDF); the activity expressed as IC<sub>50</sub> [ $\mu$ M]; selectivity indices (SI) are given in square brackets.

|            | <b>SKBR-3</b>             | <b>SKOV-3</b>             | <b>PC-3</b>               | <b>HDF</b>      | <b>ilogP*</b> |
|------------|---------------------------|---------------------------|---------------------------|-----------------|---------------|
| <b>GDM</b> | 0.58 $\pm$ 0.05<br>[1.81] | 0.64 $\pm$ 0.11<br>[1.64] | 0.60 $\pm$ 0.03<br>[1.75] | 1.05 $\pm$ 0.08 | 3.04          |
| <b>1</b>   | 1.84 $\pm$ 0.11<br>[0.82] | 1.90 $\pm$ 0.09<br>[0.79] | 1.37 $\pm$ 0.02<br>[1.1]  | 1.51 $\pm$ 0.06 | 3.86          |
| <b>2</b>   | 0.92 $\pm$ 0.01<br>[3.05] | 0.84 $\pm$ 0.01<br>[3.35] | 0.95 $\pm$ 0.05<br>[2.96] | 2.81 $\pm$ 0.44 | 4.25          |
| <b>3</b>   | 0.96 $\pm$ 0.08<br>[1.42] | 0.96 $\pm$ 0.03<br>[1.42] | 0.87 $\pm$ 0.01<br>[1.56] | 1.36 $\pm$ 0.02 | 4.33          |
| <b>4</b>   | 2.16 $\pm$ 0.12<br>[1.33] | 2.02 $\pm$ 0.07<br>[1.43] | 1.93 $\pm$ 0.01<br>[1.49] | 2.88 $\pm$ 0.14 | 4.36          |
| <b>5</b>   | 1.06 $\pm$ 0.33<br>[1.42] | 1.04 $\pm$ 0.03<br>[1.45] | 1.11 $\pm$ 0.01<br>[1.36] | 1.51 $\pm$ 0.12 | 4.33          |
| <b>6</b>   | 1.07 $\pm$ 0.41<br>[2.44] | 1.03 $\pm$ 0.05<br>[2.53] | 1.04 $\pm$ 0.02<br>[2.51] | 2.61 $\pm$ 0.08 | 4.30          |
| <b>7</b>   | 0.71 $\pm$ 0.02<br>[1.52] | 0.79 $\pm$ 0.03<br>[1.37] | 0.71 $\pm$ 0.01<br>[1.52] | 1.08 $\pm$ 0.07 | 4.34          |
| <b>8</b>   | 1.49 $\pm$ 0.05<br>[1.70] | 1.51 $\pm$ 0.04<br>[1.68] | 1.63 $\pm$ 0.03<br>[1.55] | 2.53 $\pm$ 0.13 | 4.05          |
| <b>9</b>   | 1.38 $\pm$ 0.06<br>[1.28] | 1.44 $\pm$ 0.04<br>[1.23] | 1.27 $\pm$ 0.09<br>[1.39] | 1.77 $\pm$ 0.04 | 3.51          |
| <b>10</b>  | 1.66 $\pm$ 0.04<br>[1.12] | 1.32 $\pm$ 0.05<br>[1.41] | 1.16 $\pm$ 0.02<br>[1.6]  | 1.86 $\pm$ 0.11 | 4.10          |
| <b>11</b>  | 1.88 $\pm$ 0.02<br>[1.43] | 1.91 $\pm$ 0.08<br>[1.40] | 1.96 $\pm$ 0.02<br>[1.37] | 2.68 $\pm$ 0.28 | 4.36          |
| <b>12</b>  | 0.93 $\pm$ 0.01<br>[1.71] | 0.91 $\pm$ 0.02<br>[1.75] | 0.88 $\pm$ 0.05<br>[1.81] | 1.59 $\pm$ 0.02 | 4.15          |
| <b>1a</b>  | 1.03 $\pm$ 0.03<br>[1.69] | 1.16 $\pm$ 0.10<br>[1.50] | 1.09 $\pm$ 0.01<br>[1.60] | 1.74 $\pm$ 0.22 | 4.35          |
| <b>2a</b>  | 1.09 $\pm$ 0.05<br>[1.37] | 1.08 $\pm$ 0.05<br>[1.38] | 1.01 $\pm$ 0.03<br>[1.48] | 1.49 $\pm$ 0.02 | 4.12          |
| <b>3a</b>  | 0.81 $\pm$ 0.01<br>[2.05] | 0.84 $\pm$ 0.08<br>[1.98] | 0.79 $\pm$ 0.02<br>[2.10] | 1.66 $\pm$ 0.01 | 4.20          |
| <b>4a</b>  | 0.94 $\pm$ 0.01<br>[2.17] | 0.92 $\pm$ 0.02<br>[2.22] | 0.97 $\pm$ 0.01<br>[2.10] | 2.04 $\pm$ 0.06 | 4.20          |
| <b>5a</b>  | 2.33 $\pm$ 0.16<br>[1.28] | 2.04 $\pm$ 0.04<br>[1.47] | 2.39 $\pm$ 0.05<br>[1.25] | 2.99 $\pm$ 0.09 | 4.19          |
| <b>6a</b>  | 0.85 $\pm$ 0.01<br>[1.73] | 0.82 $\pm$ 0.03<br>[1.79] | 0.87 $\pm$ 0.03<br>[1.69] | 1.47 $\pm$ 0.06 | 3.97          |

|            |                      |                      |                      |            |      |
|------------|----------------------|----------------------|----------------------|------------|------|
| <b>7a</b>  | 1.62 ±0.02<br>[1.27] | 1.53 ±0.07<br>[1.35] | 1.53 ±0.04<br>[1.35] | 2.06 ±0.12 | 4.20 |
| <b>8a</b>  | 1.93 ±0.06<br>[1.64] | 1.88 ±0.05<br>[1.69] | 1.84 ±0.03<br>[1.72] | 3.17 ±0.03 | 3.89 |
| <b>9a</b>  | 0.99 ±0.01<br>[1.08] | 0.96 ±0.05<br>[1.11] | 0.85 ±0.02<br>[1.26] | 1.07 ±0.01 | 3.45 |
| <b>10a</b> | 1.33 ±0.04<br>[1.46] | 1.05 ±0.01<br>[1.85] | 1.18 ±0.01<br>[1.64] | 1.94 ±0.11 | 4.01 |
| <b>11a</b> | 1.38 ±0.02<br>[1.58] | 1.32 ±0.07<br>[1.65] | 1.39 ±0.01<br>[1.57] | 2.18 ±0.01 | 4.17 |
| <b>12a</b> | 0.81 ±0.05<br>[2.38] | 0.85 ±0.01<br>[2.27] | 0.84 ±0.04<br>[2.30] | 1.93 ±0.03 | 4.32 |

SKBR-3 human breast cancer cell line  
SKOV-3 human ovarian cancer cell line  
PC-3 human prostate cancer cell line  
HDF human dermal fibroblasts

\* - **ilogP** calculated by **SwissADME** tool (<http://www.swissadme.ch/>)<sup>5,6</sup>



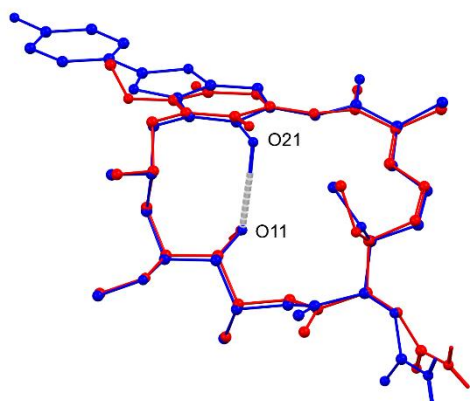

**Figure S1** Overlay of the geldanamycin (CCDC 1988068)<sup>7</sup> (red) and **2a** (blue) molecules (rms = 0.233 Å) in conformations found in their crystal structures. Intramolecular O-H···O hydrogen bond in **2a** is shown with a dashed line. Only N-H and O-H hydrogen atoms are shown.

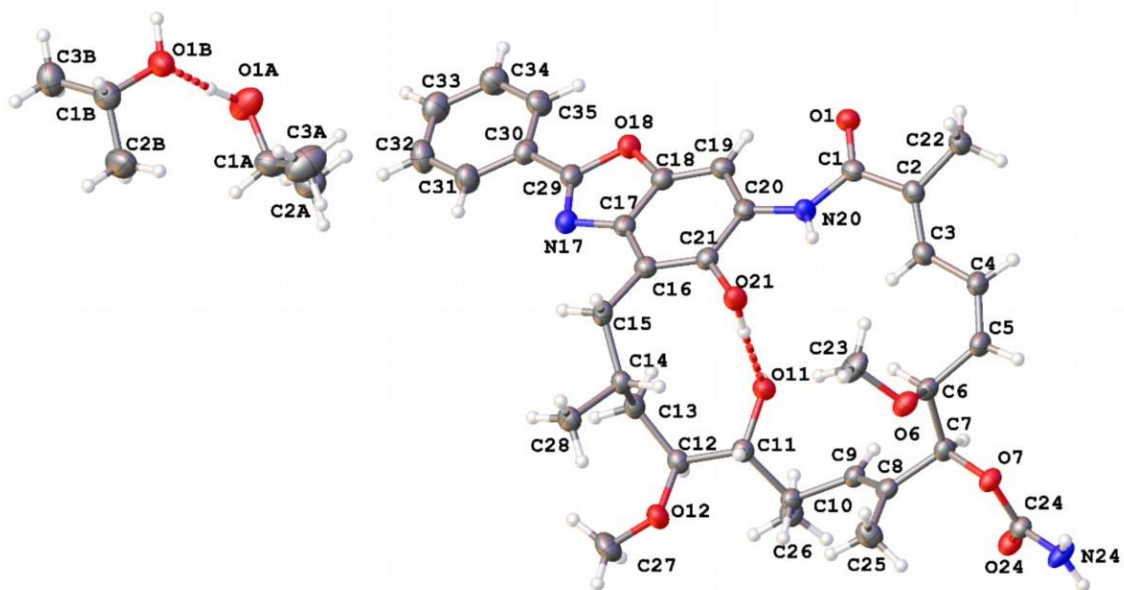

**Figure S2** The asymmetric unit of **1a**. Displacement ellipsoids are shown at the 50% probability level.

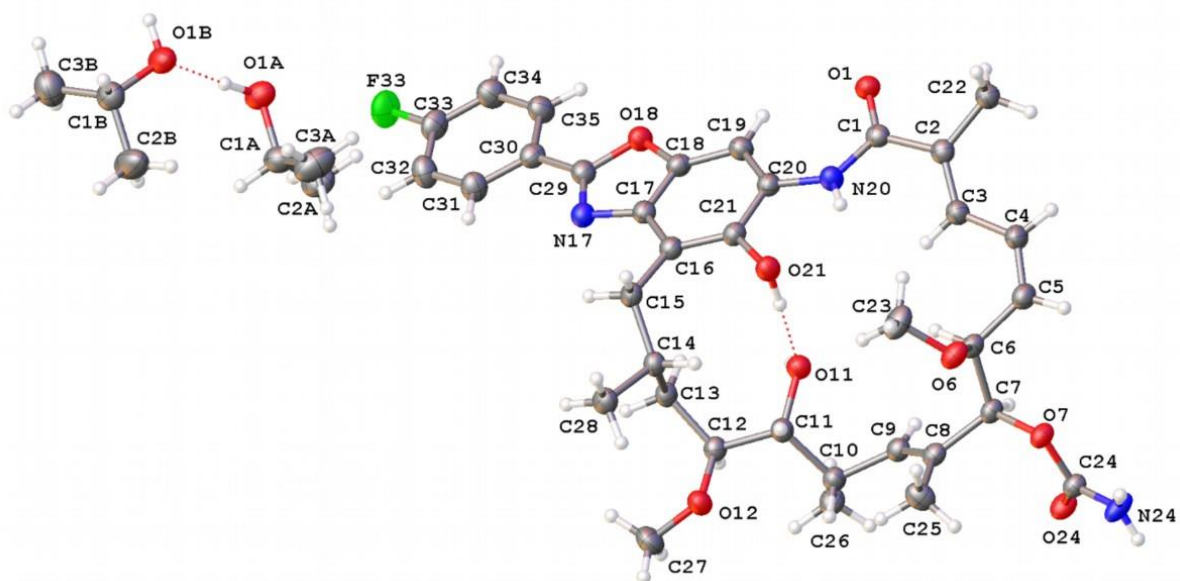

**Figure S3** The asymmetric unit of **2a**. Displacement ellipsoids are shown at the 50% probability level.

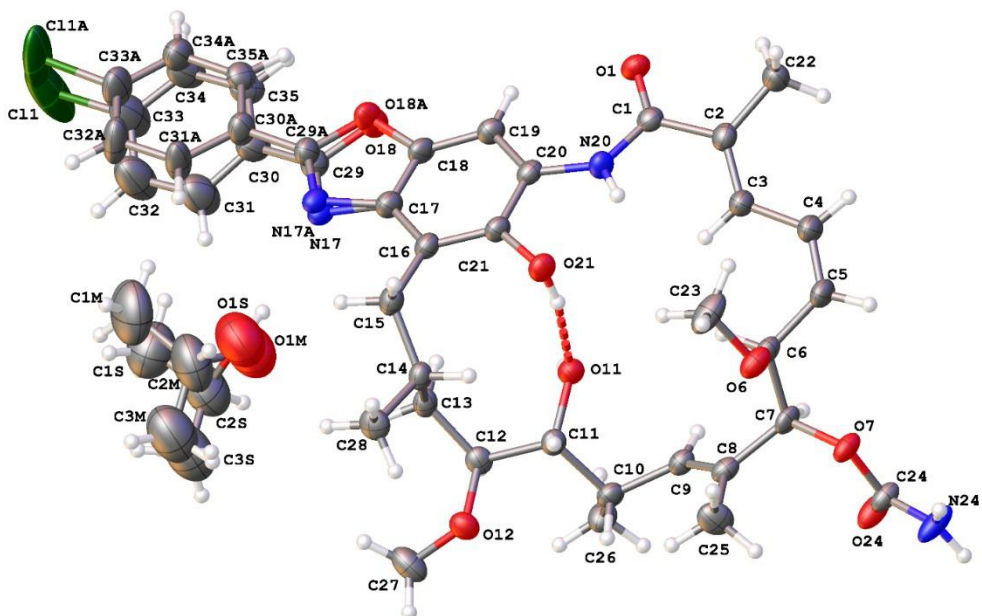

**Figure S4** The asymmetric unit of **3a**. Displacement ellipsoids are shown at the 50% probability level. The isopropanol molecule and the substituent at C(29) are disordered.

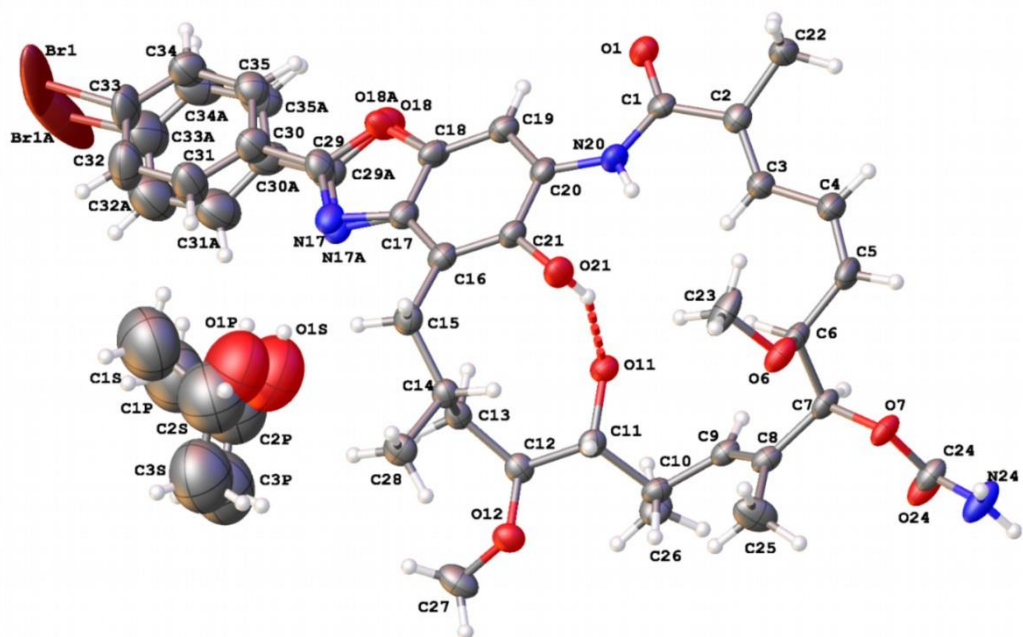

**Figure S5** The asymmetric unit of **4a**. Displacement ellipsoids are shown at the 50% probability level. The isopropanol molecule and the substituent at C(29) are disordered.

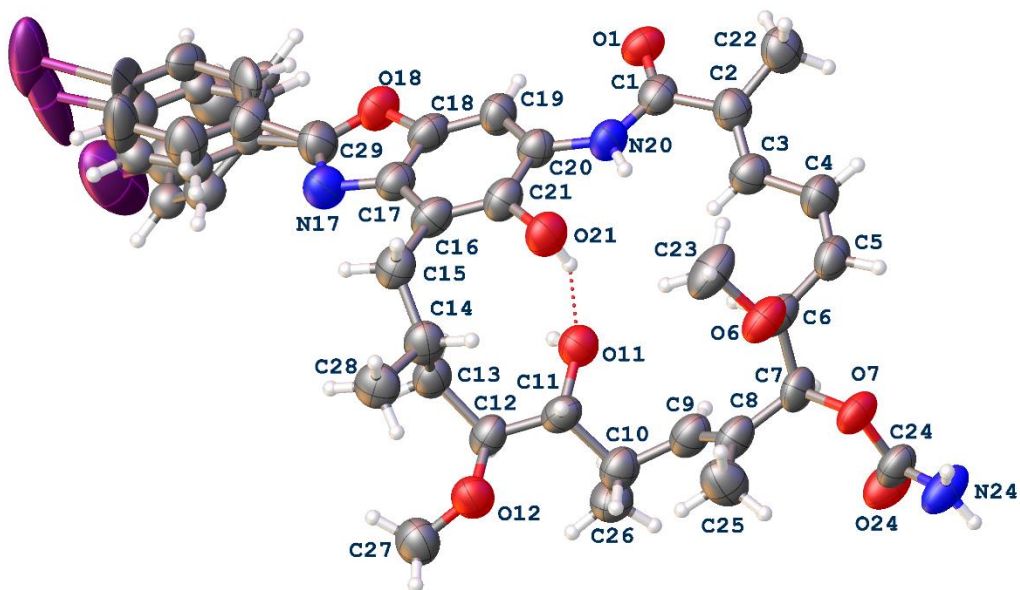

**Figure S6** The asymmetric unit of **5a**. Displacement ellipsoids are shown at the 50% probability level. The isopropanol molecule and the substituent at C(29) are disordered.

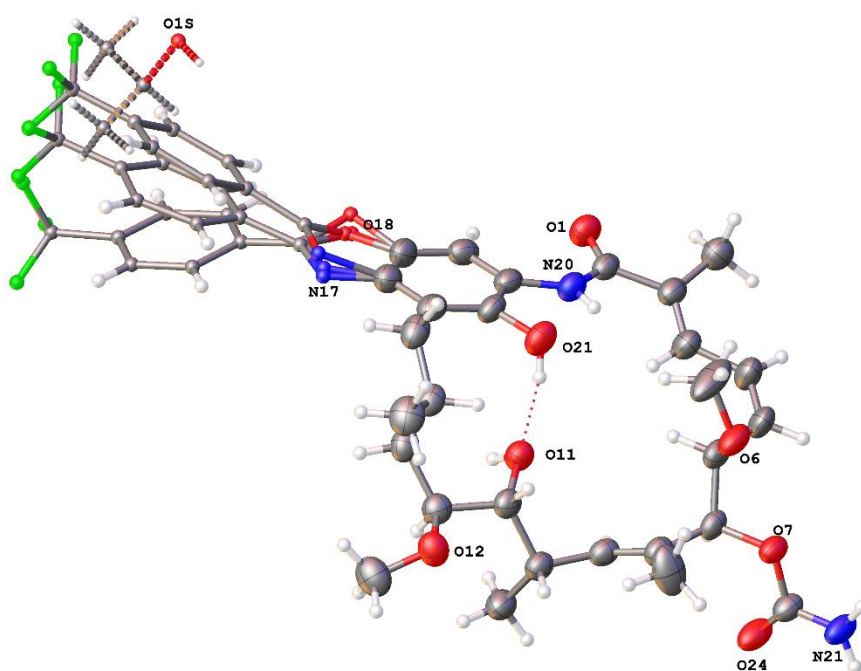

**Figure S7** The asymmetric unit of **6a**. Displacement ellipsoids for the ordered part of the molecule are shown at the 50% probability level. The substituent at C(29) shown as a ‘ball and stick’ model is disordered over three sites. The isopropanol is shown with dashed bonds.

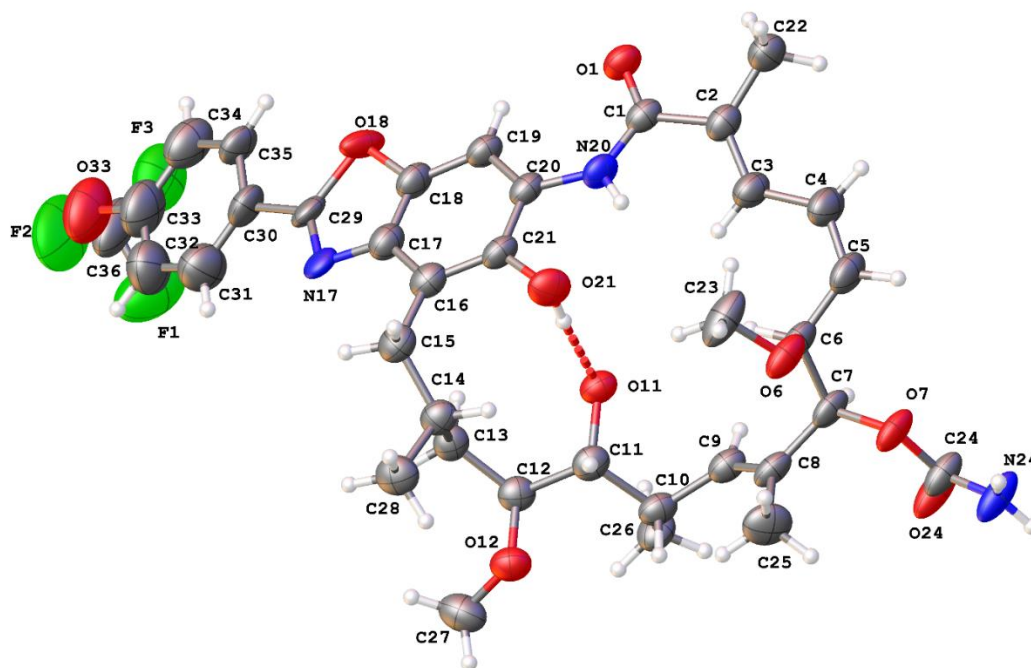

**Figure S8** The asymmetric unit of **7a**. Displacement ellipsoids are shown at the 50% probability level. The substituent at C(29) is disordered over three sites and only one site with the major occupancy factor is shown in the diagram.

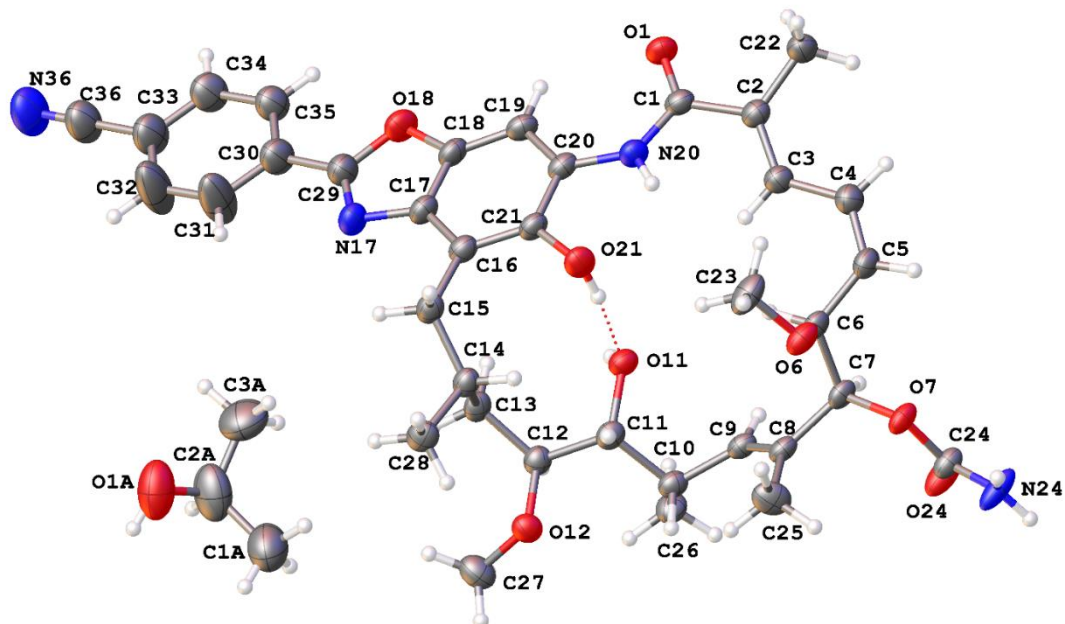

**Figure S9** The asymmetric unit of **8a**. Displacement ellipsoids are shown at the 50% probability level.





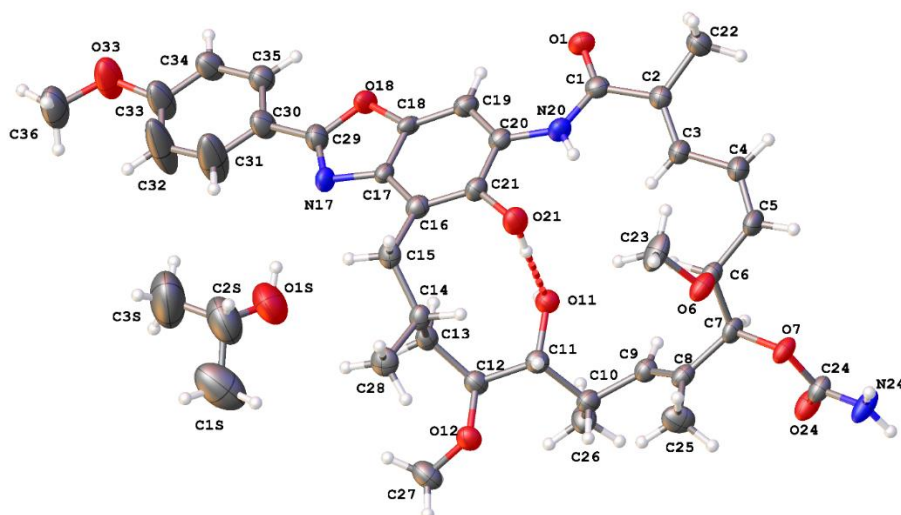

**Figure S12** The asymmetric unit of **11a**. Displacement ellipsoids are shown at the 50% probability level. The substituent at C(29) is disordered over three sites and only one site with the major occupancy factor is shown in the diagram. The isopropanol solvent molecule has a partial occupancy.

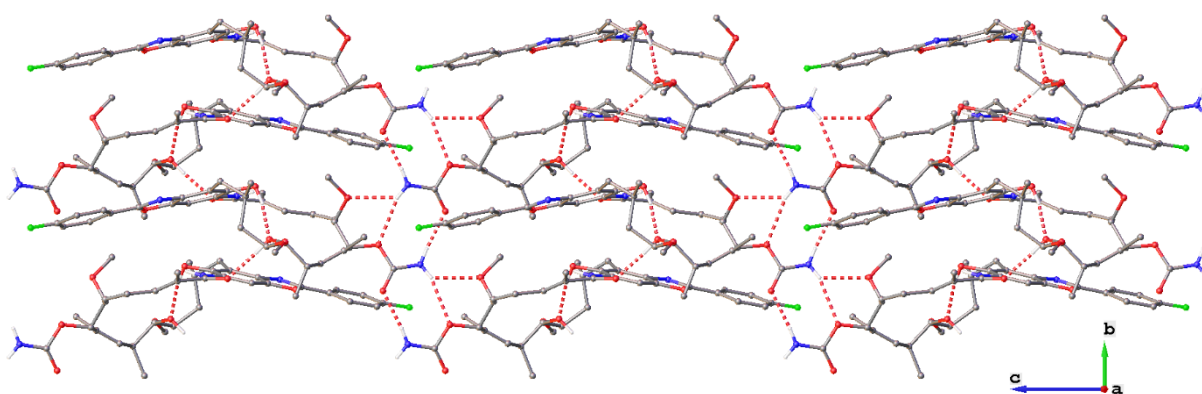

**Figure S13** View of the 2D assembly *via* hydrogen bonds in **2a**. This structural motif is observed in all studied crystal structures.

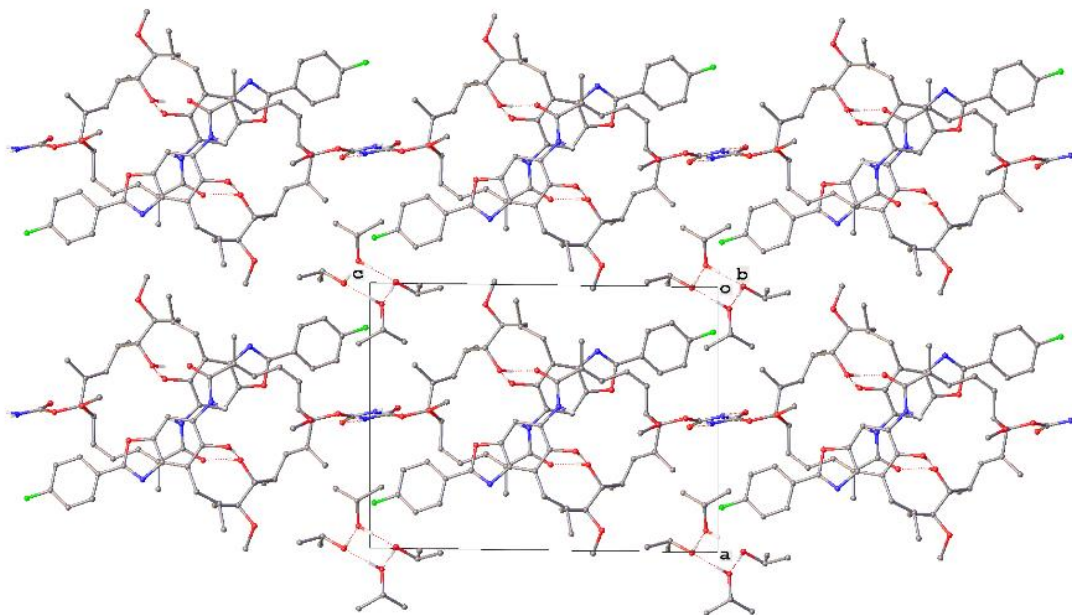

**Figure S14** Crystal packing of **2a** shown in the projection along the b axis. Hydrogen bonded isopropanol molecules form a chain extended along the b axis.

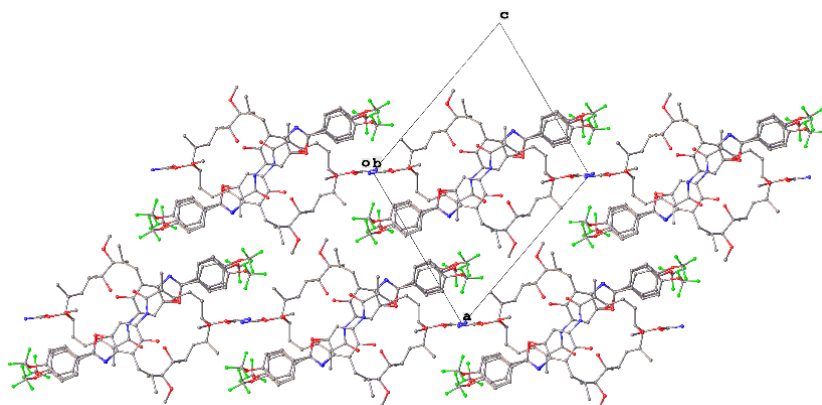

**Figure S15** Crystal packing of **7a** shown in the projection along the b axis.

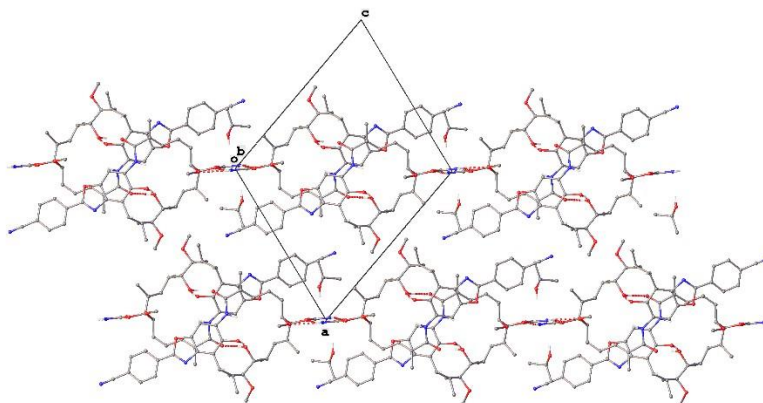



**Figure S16** Crystal packing of **8a** shown in the projection along the b axis. The isopropanol solvent molecule in the site with the major occupation is not hydrogen-bonded to the host molecules.

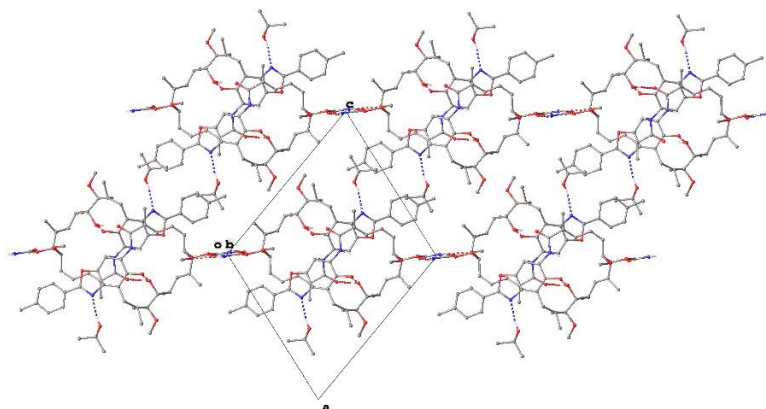

**Figure S17** Crystal packing of **10a** shown in the projection along the b axis. Isopropanol molecules are hydrogen bonded to the host molecules.

**Figure S18** Progress of the substrate conversion [%] per unit of time [min] for derivatives **1a-11a**. The colors and shapes were assigned appropriately to the derivatives: **1a**-black square, **2a**-pink square, **3a**-red triangle, **4a**-blue triangle, **6a**-green triangle, **7a**-purple triangle, **8a**-orange dot, **9a**-blue dot, **10a**-green diamond, **11a**-purple diamond, **12a**-orange diamond.

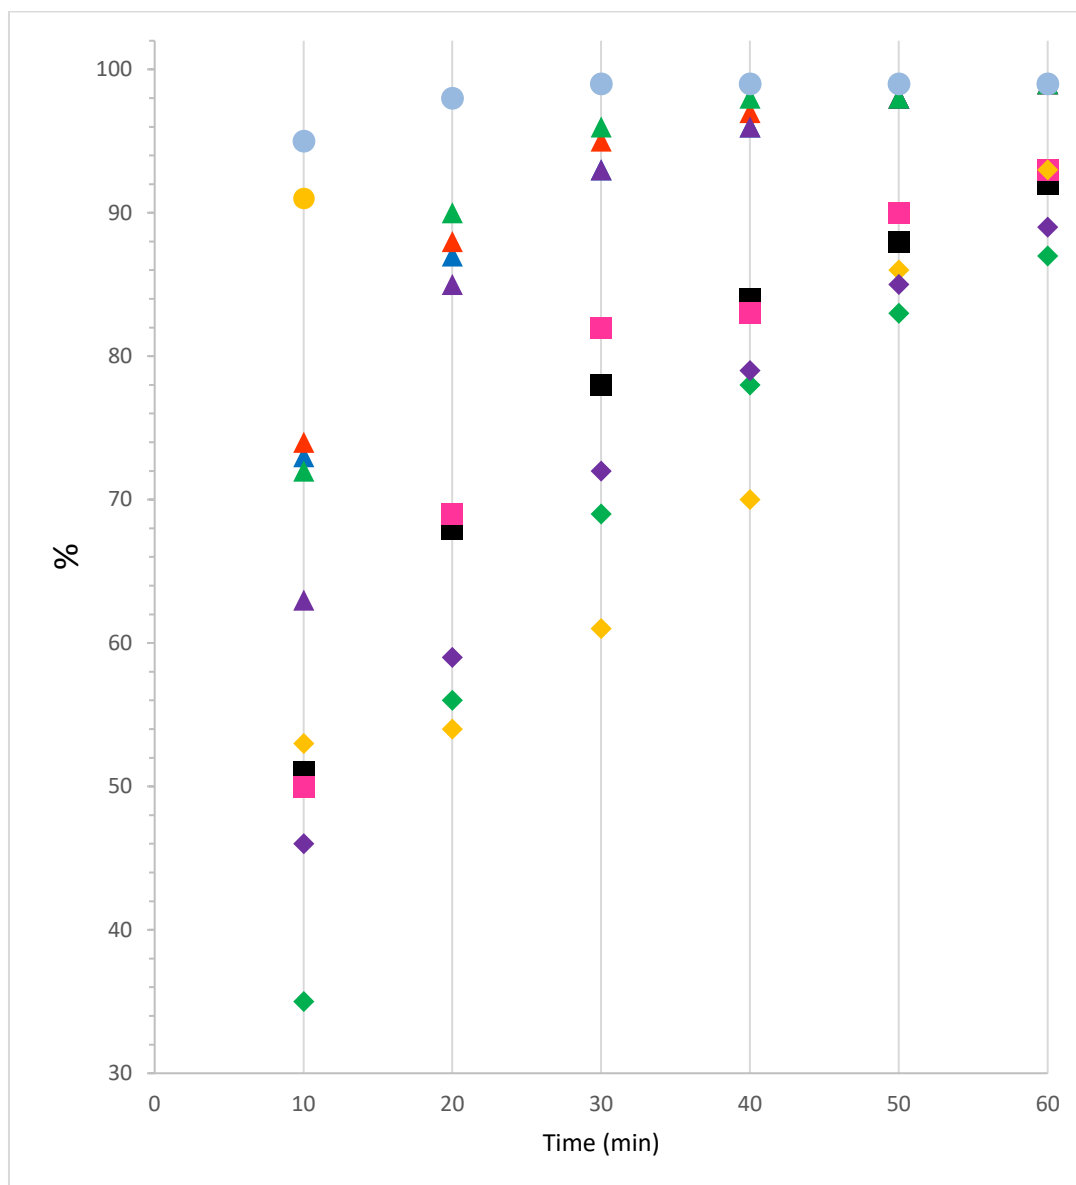

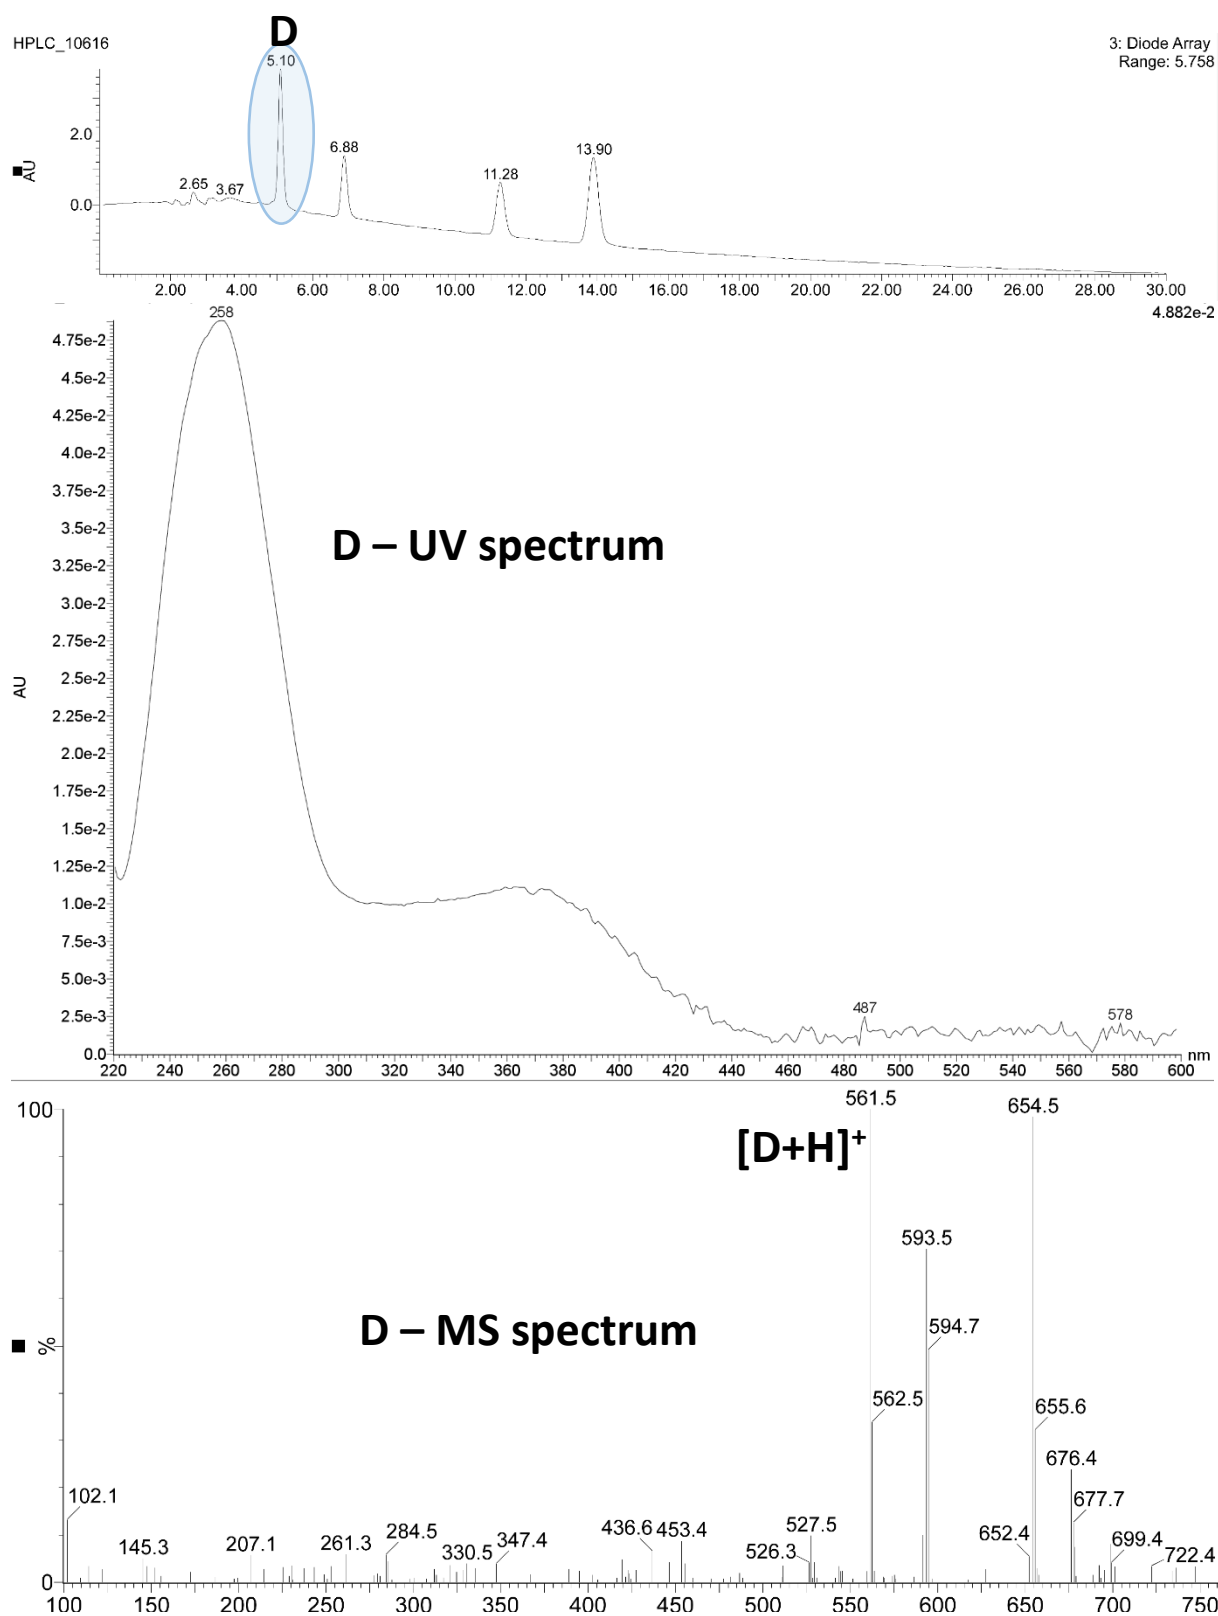

**Figure S19** HPLC chromatogram recorded for the reaction mixture during conversion **2** to **2a**, captured with intermediates (**2'** and **2''**). UV-vis and MS spectrum for the product of the first intermediate **2'**.

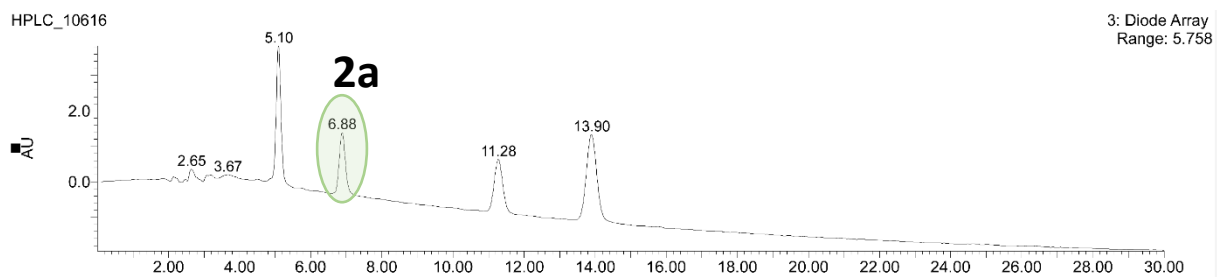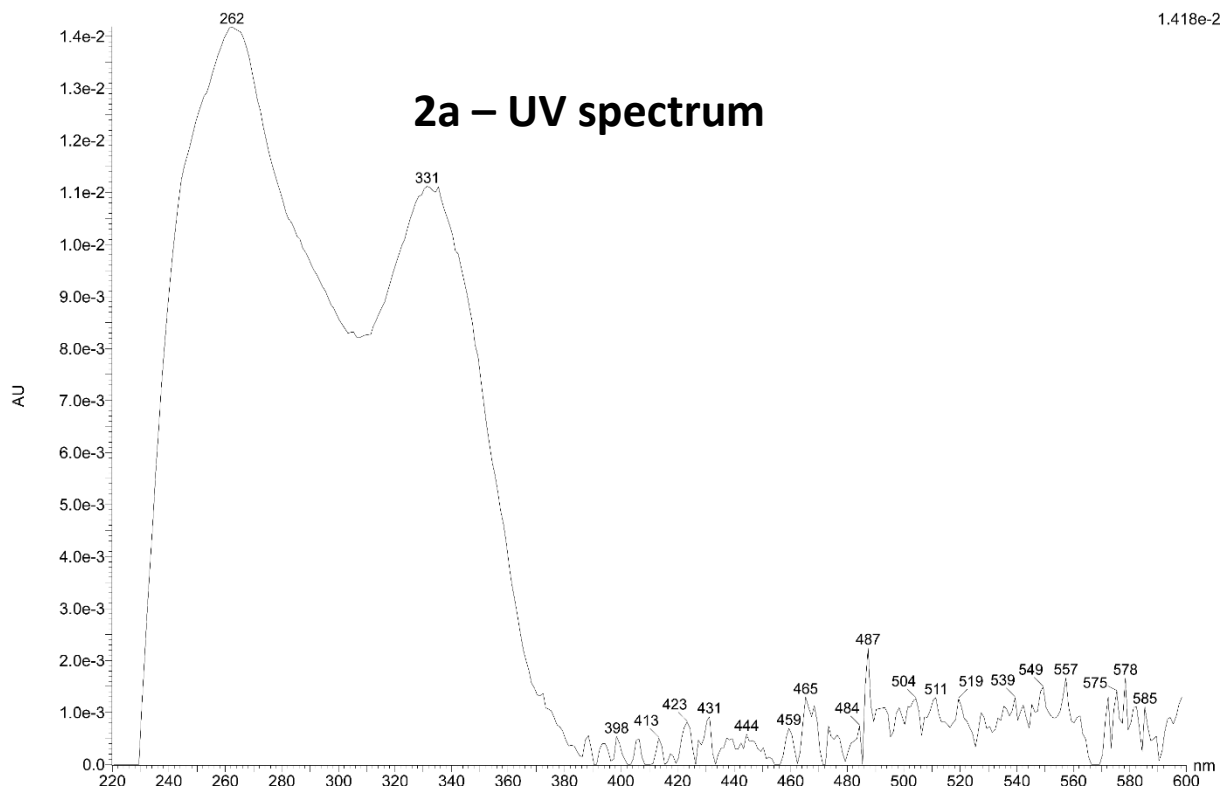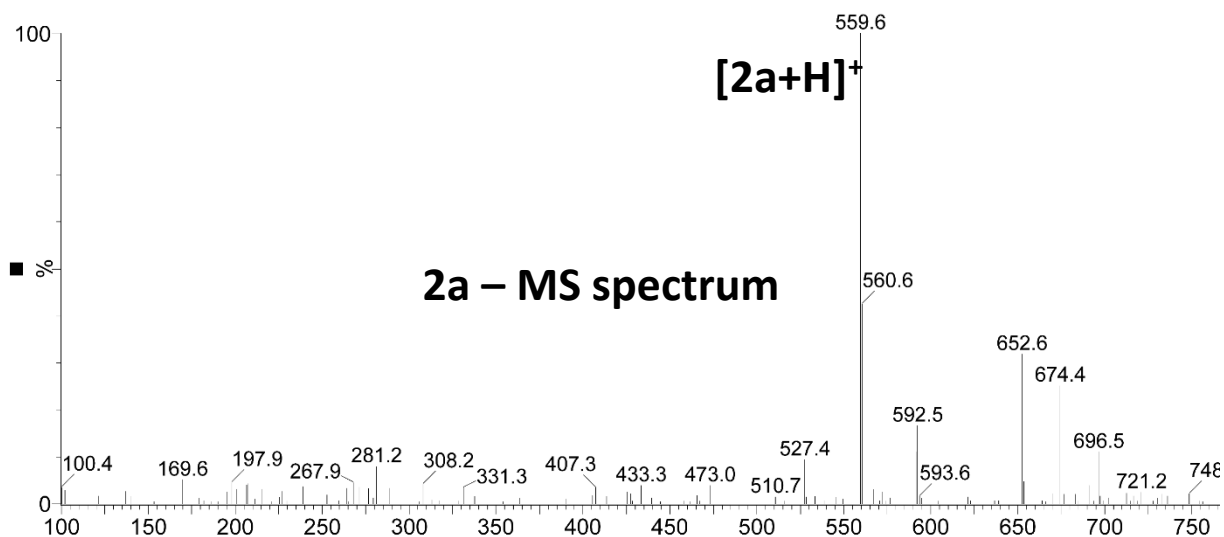

**Figure S20** HPLC chromatogram recorded for the reaction mixture during conversion **2** to **2a**, captured with intermediates (**2'** and **2''**). UV-vis and MS spectrum for the product **2a**.

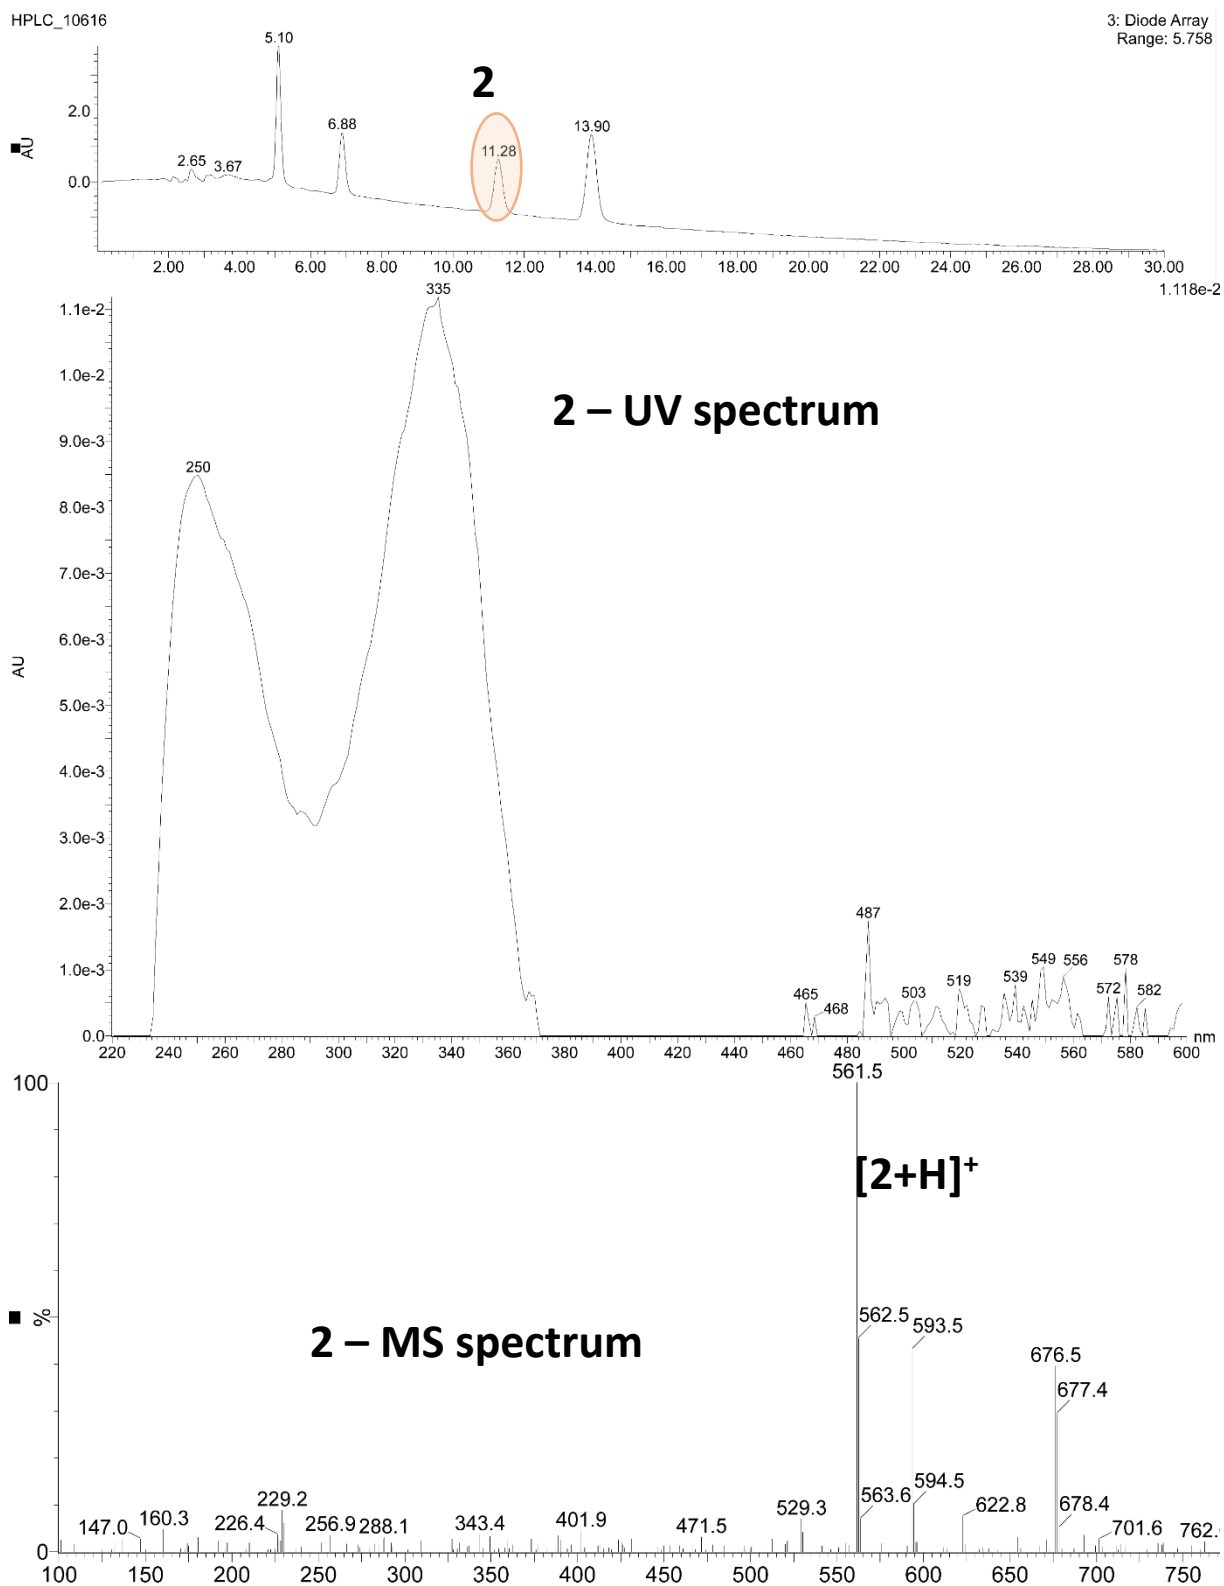

**Figure S21** HPLC chromatogram recorded for the reaction mixture during conversion **2** to **2a**, captured with intermediates (**2'** and **2''**). UV-vis and MS spectrum for substrate **2**.

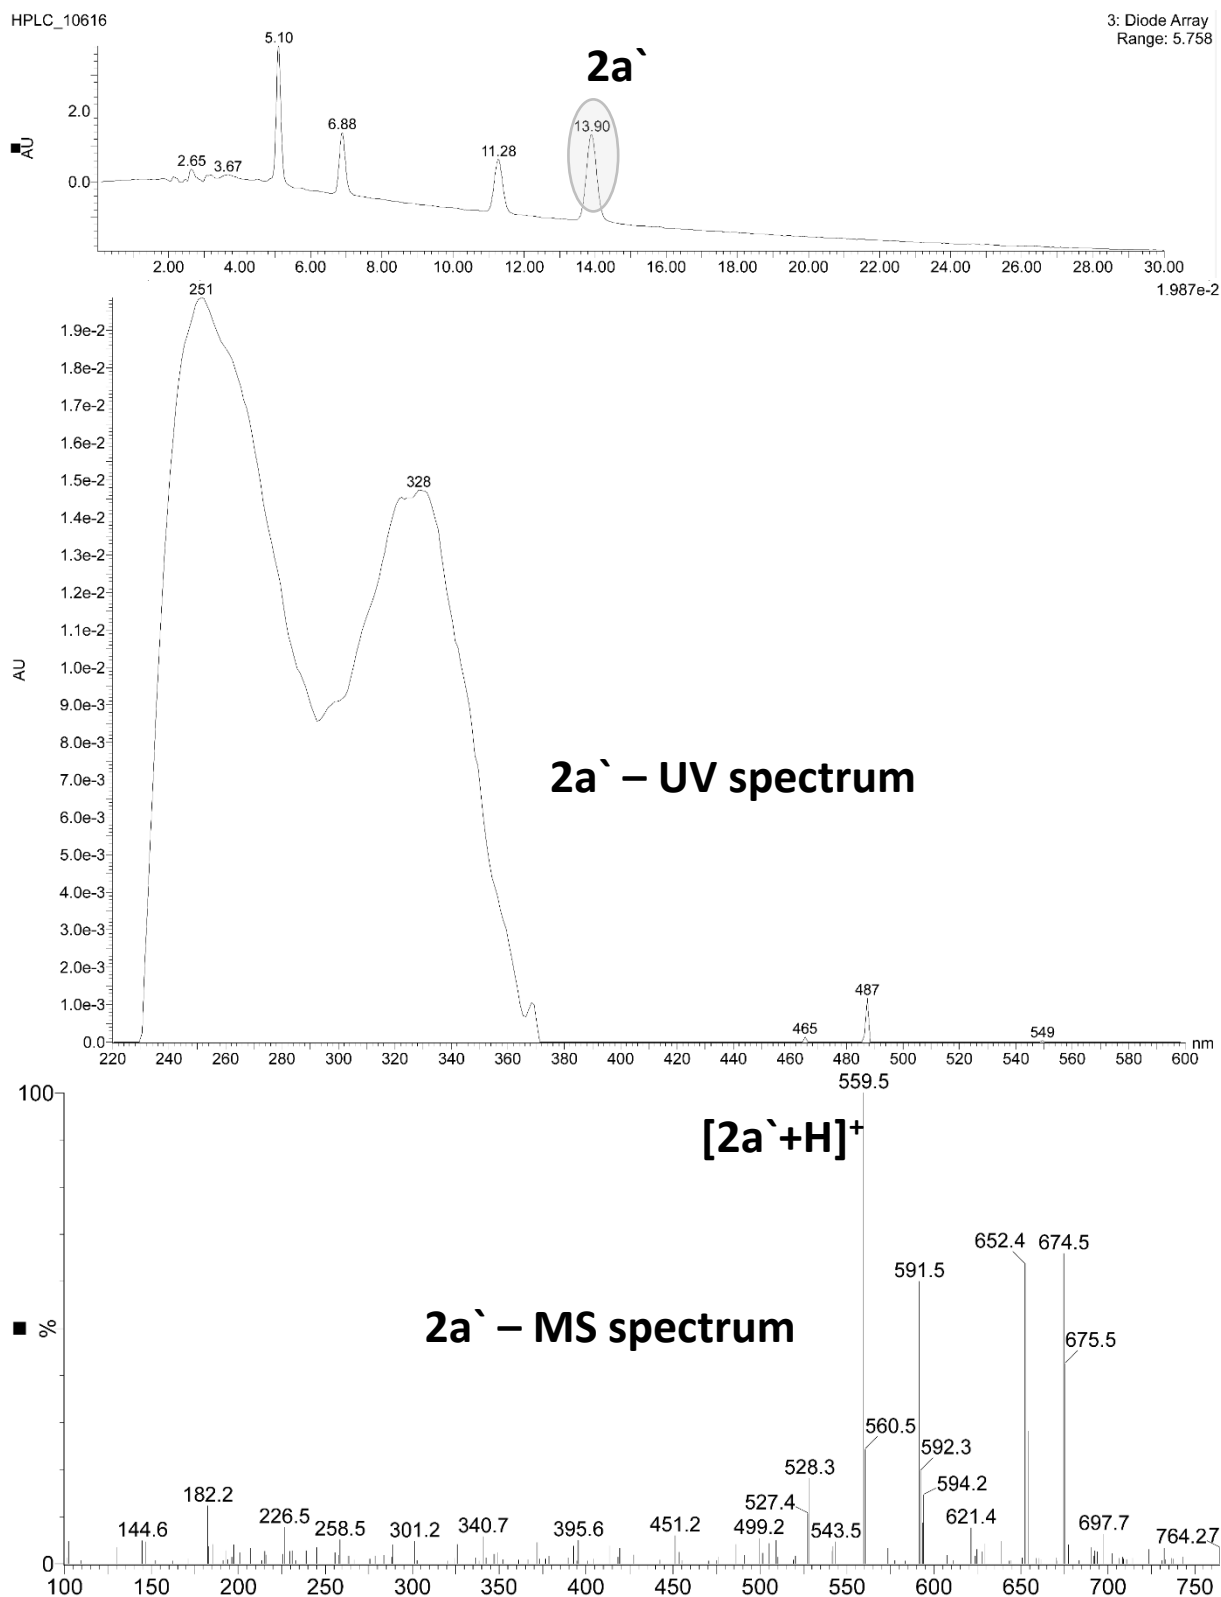

**Figure S22** HPLC chromatogram recorded for the reaction mixture during conversion **2** to **2a**, captured with intermediates (**2'** and **2''**). UV-vis and MS spectrum for the product of the second intermediate **2''**.

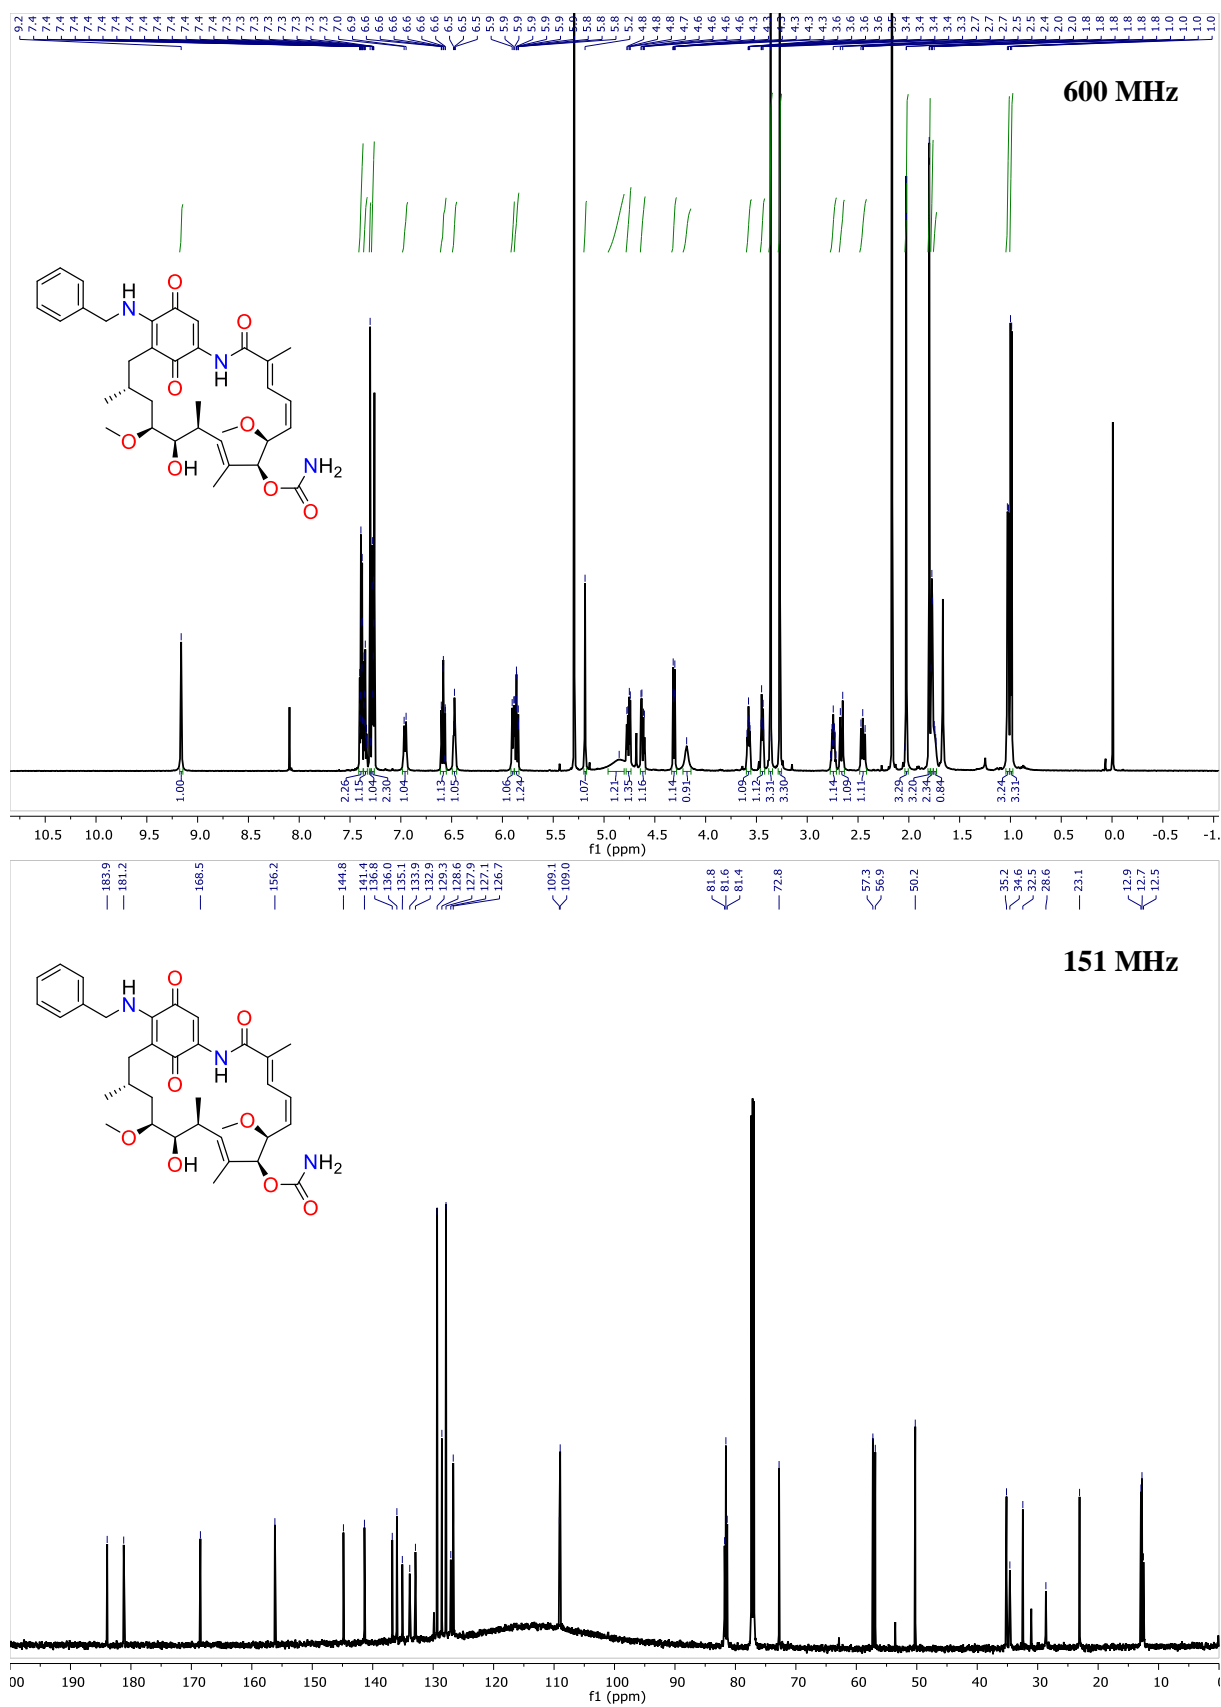

Figure S23  $^1\text{H}$  and  $^{13}\text{C}\{^1\text{H}\}$  spectra of compound 1 in  $\text{CDCl}_3$ .

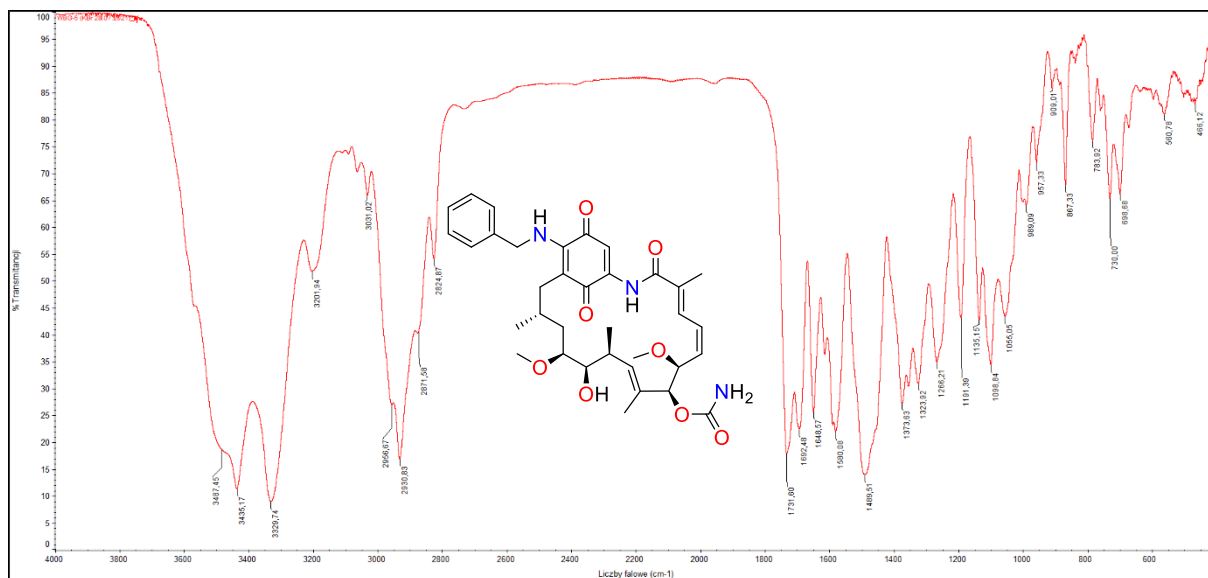

Figure S24 FT-IR spectrum of compound 1 (in KBr).



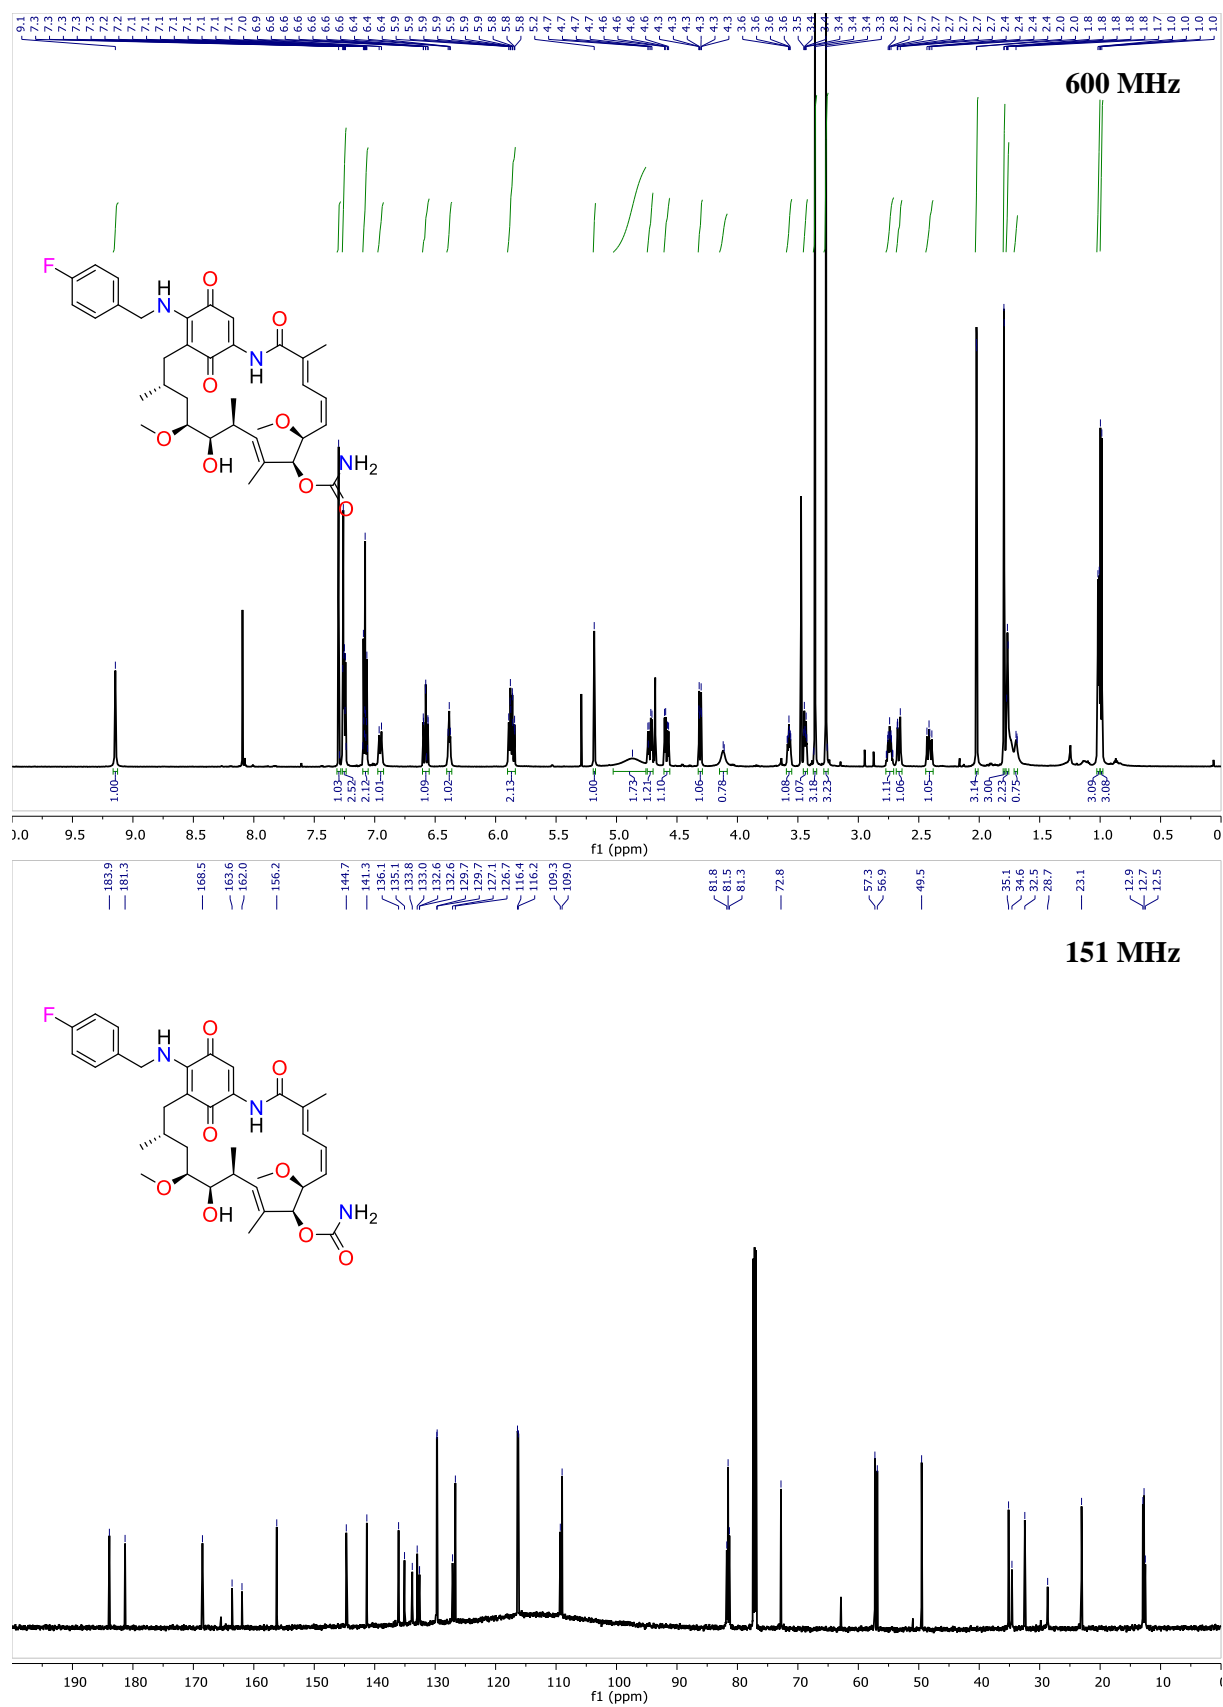

Figure S25  $^1\text{H}$  and  $^{13}\text{C}\{^1\text{H}\}$  spectra of compound 2 in  $\text{CDCl}_3$ .

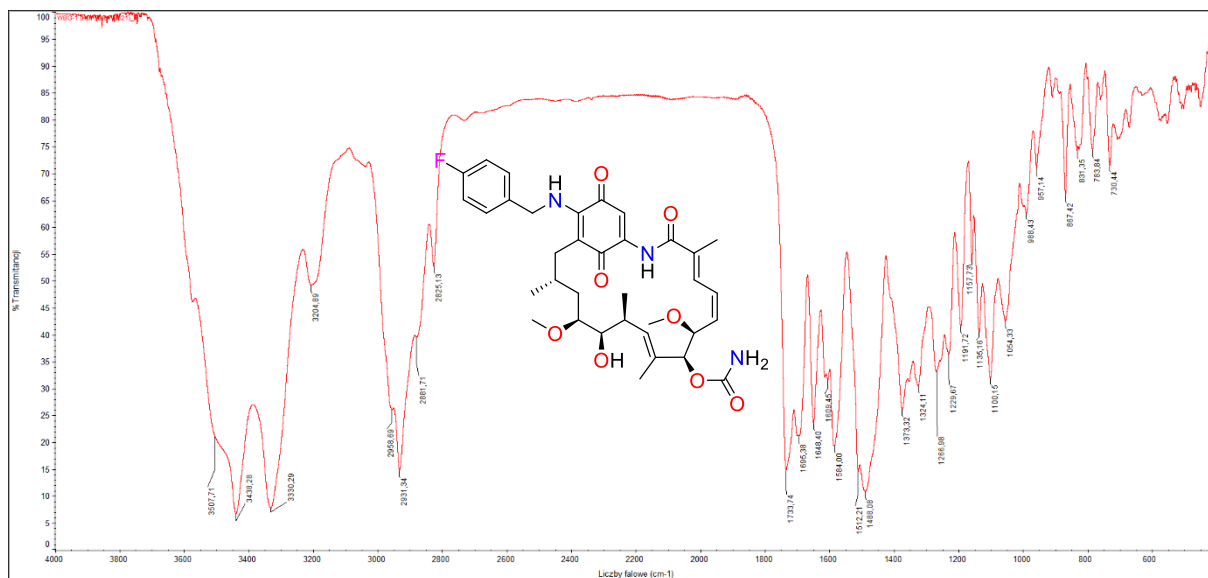

Figure S26 FT-IR spectrum of compound 2 (in KBr).

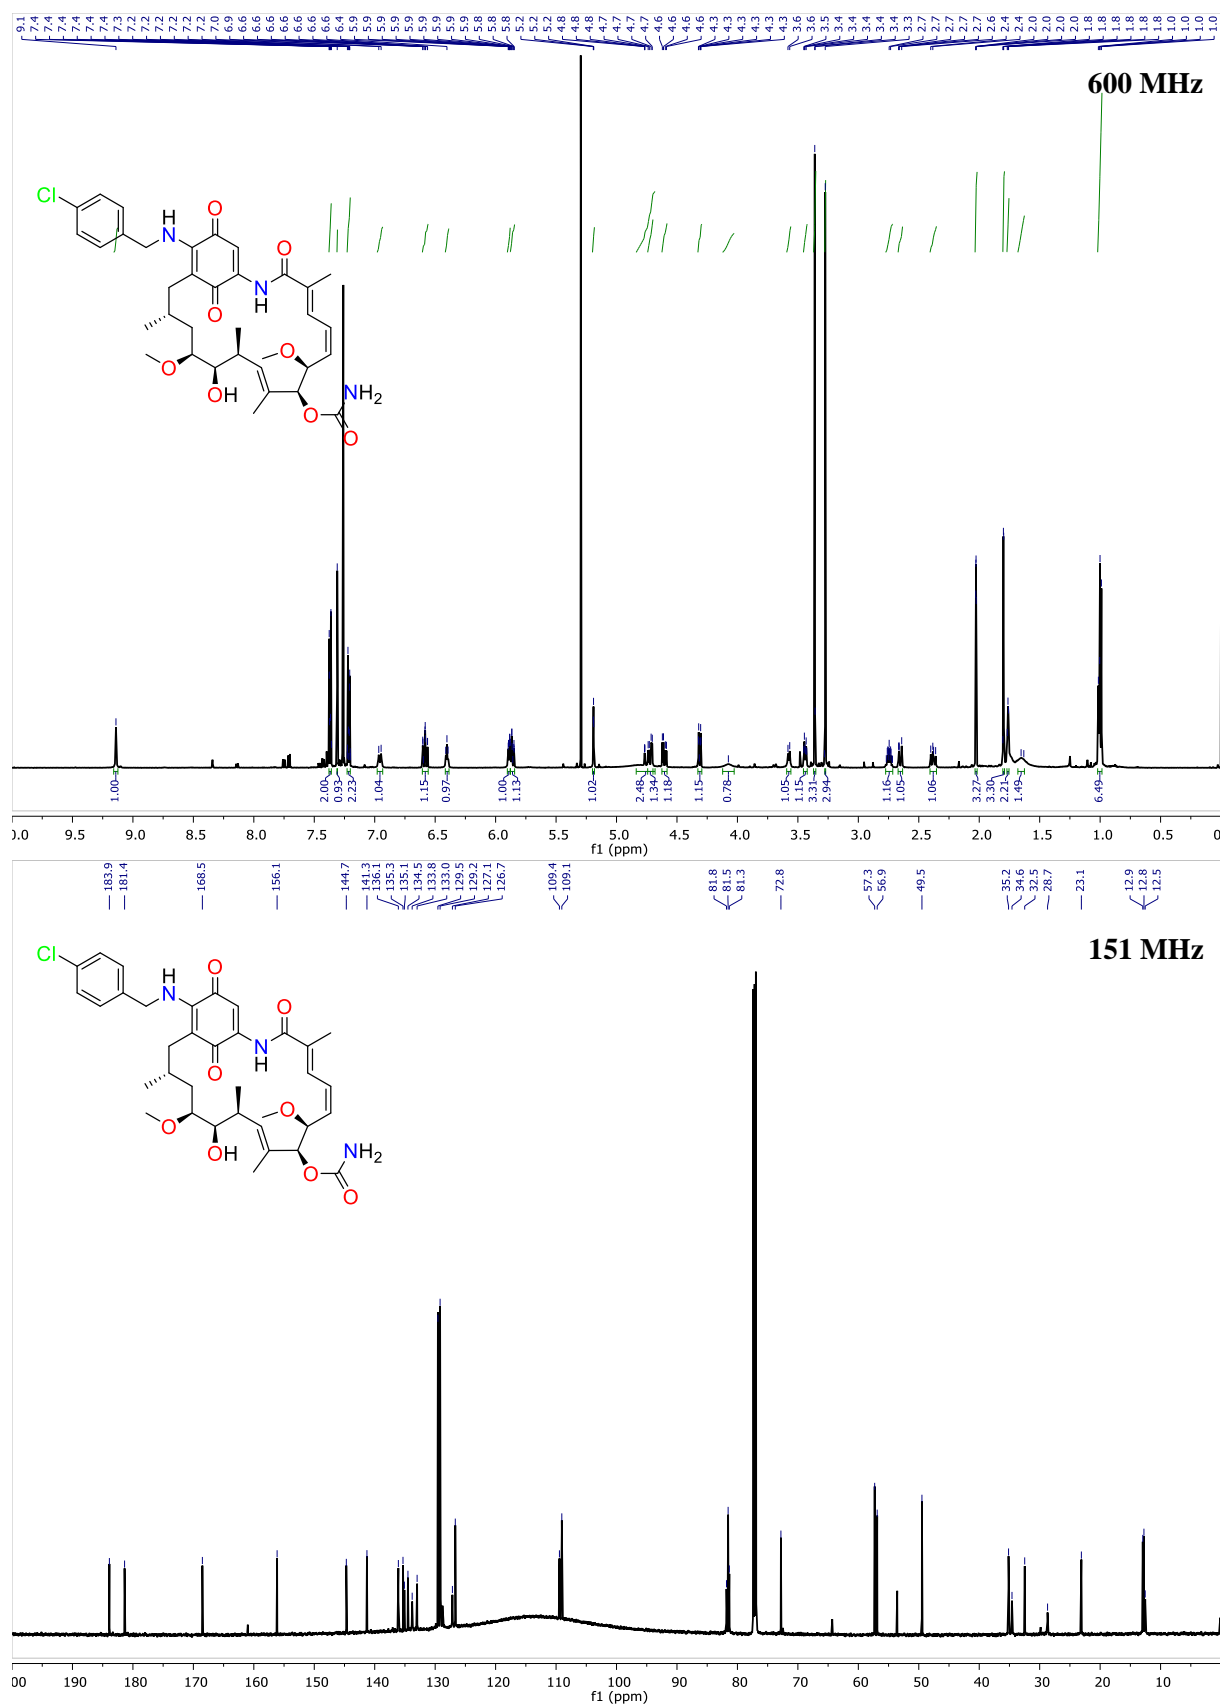

**Figure S27**  $^1\text{H}$  and  $^{13}\text{C}\{^1\text{H}\}$  spectra of compound **3** in  $\text{CDCl}_3$ .

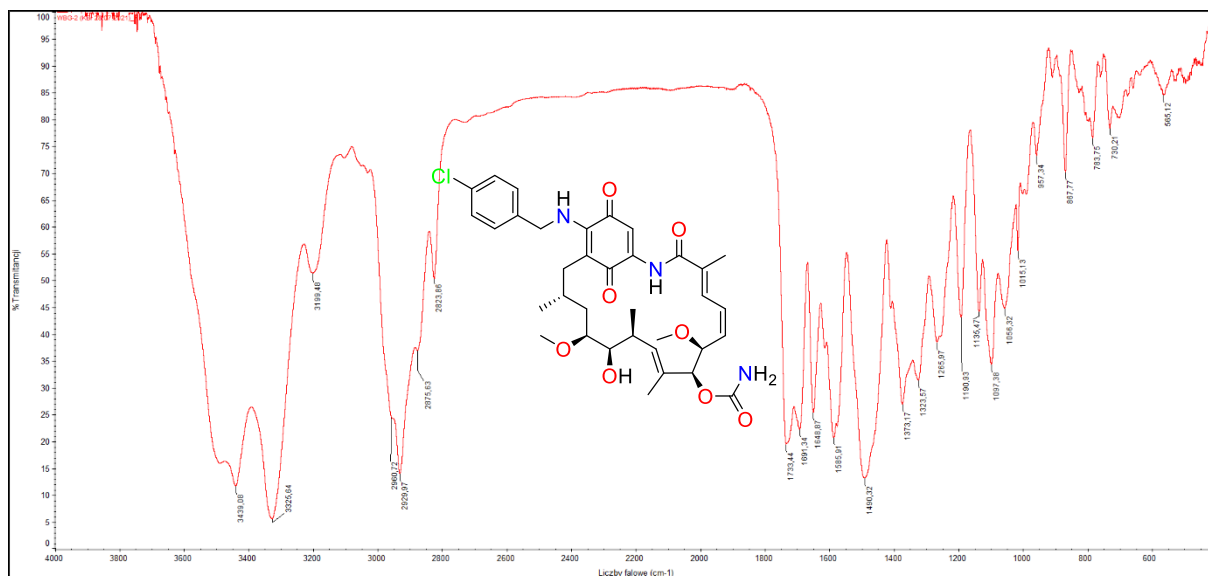

**Figure S28** FT-IR spectrum of compound **3** (in KBr).

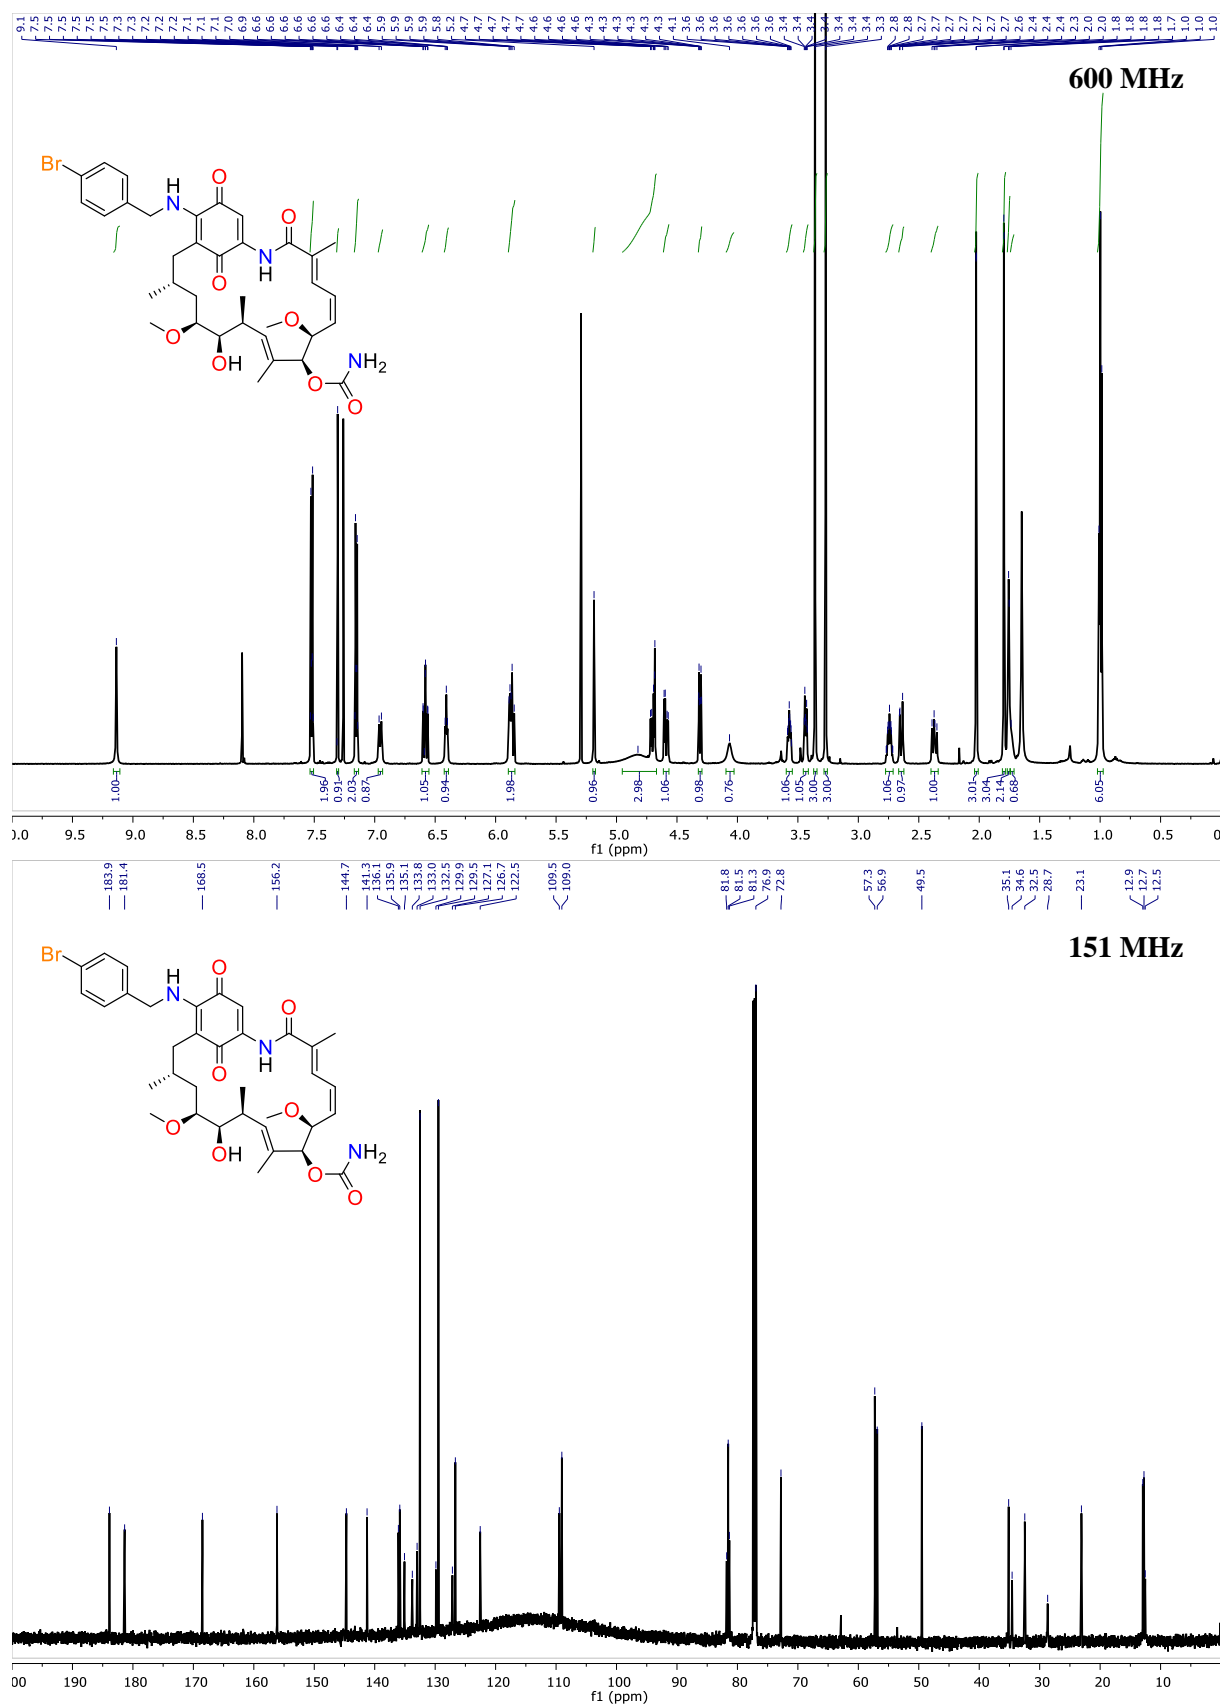

Figure S29  $^1\text{H}$  and  $^{13}\text{C}\{^1\text{H}\}$  spectra of compound 4 in  $\text{CDCl}_3$ .

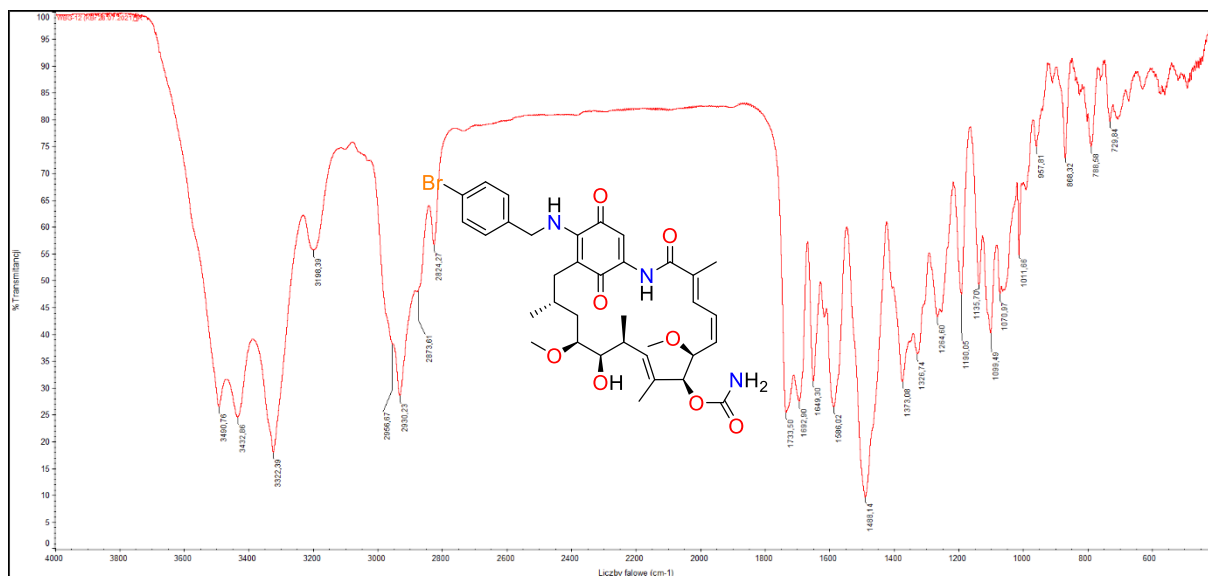

Figure S30 FT-IR spectrum of compound 4 (in KBr).

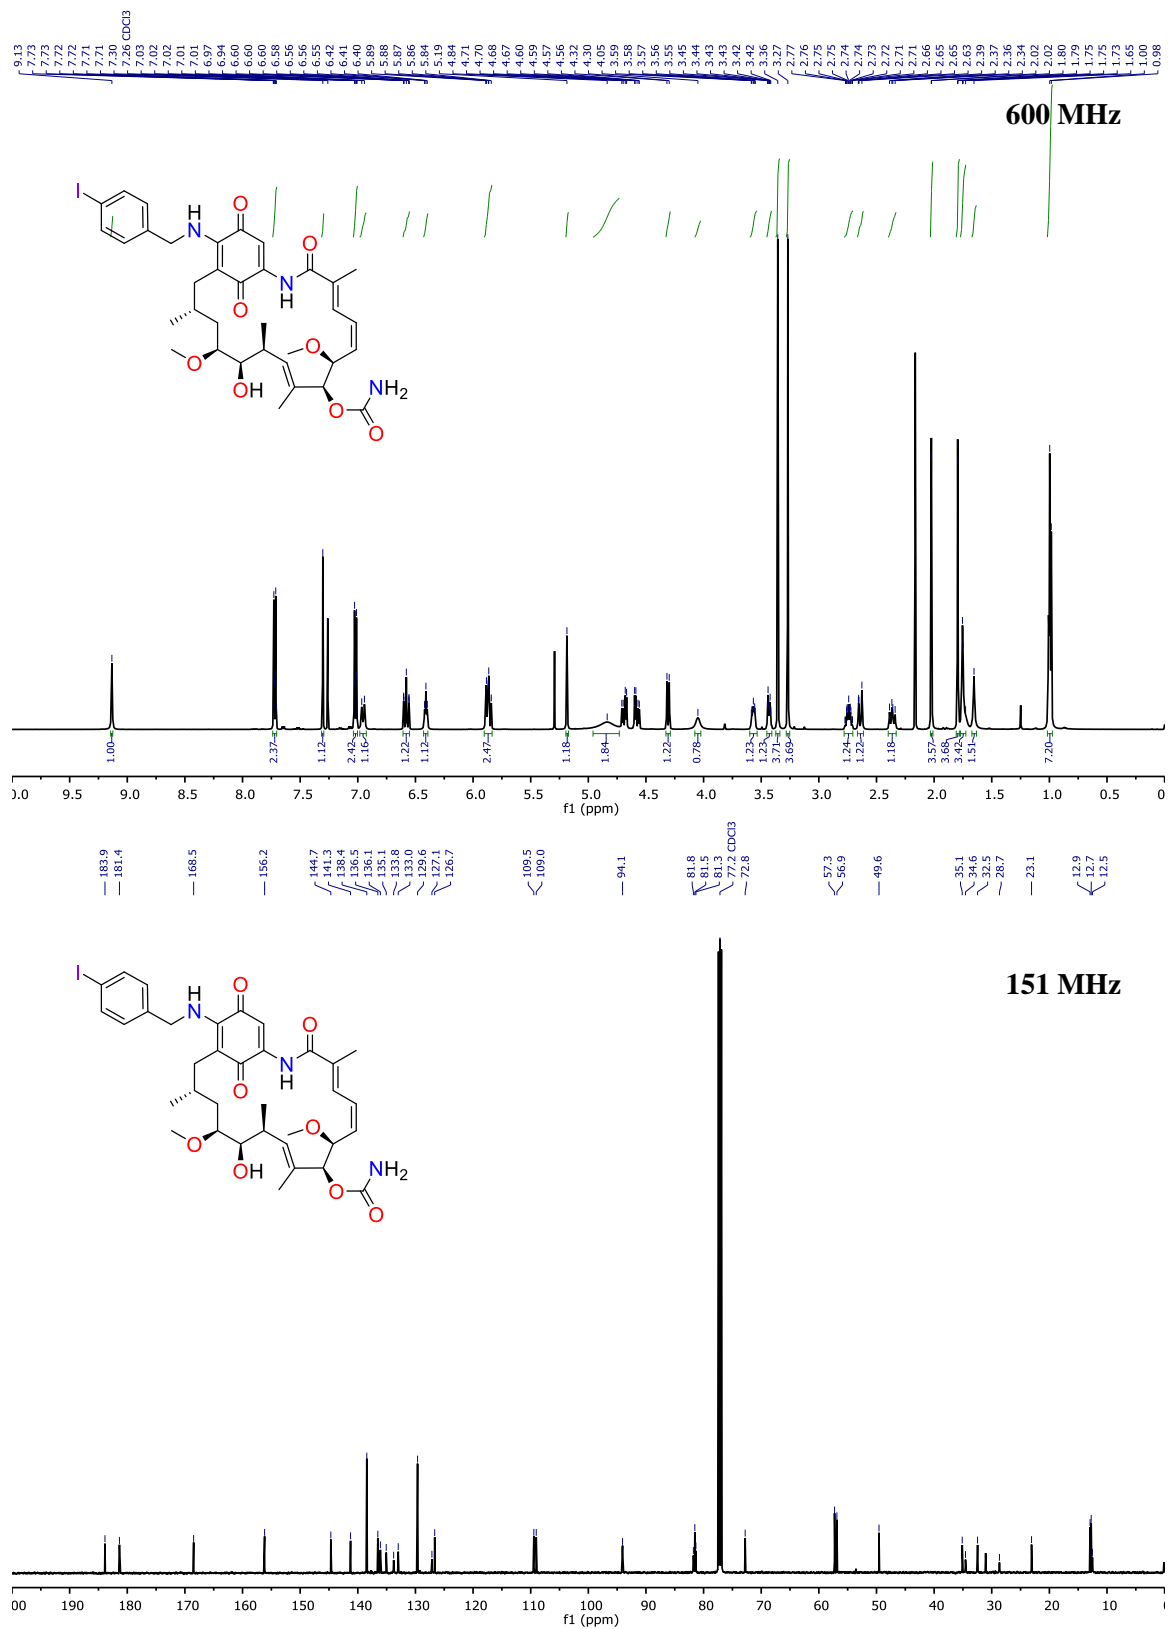

**Figure S31**  $^1\text{H}$  and  $^{13}\text{C}\{^1\text{H}\}$  spectra of compound **5** in  $\text{CDCl}_3$ .

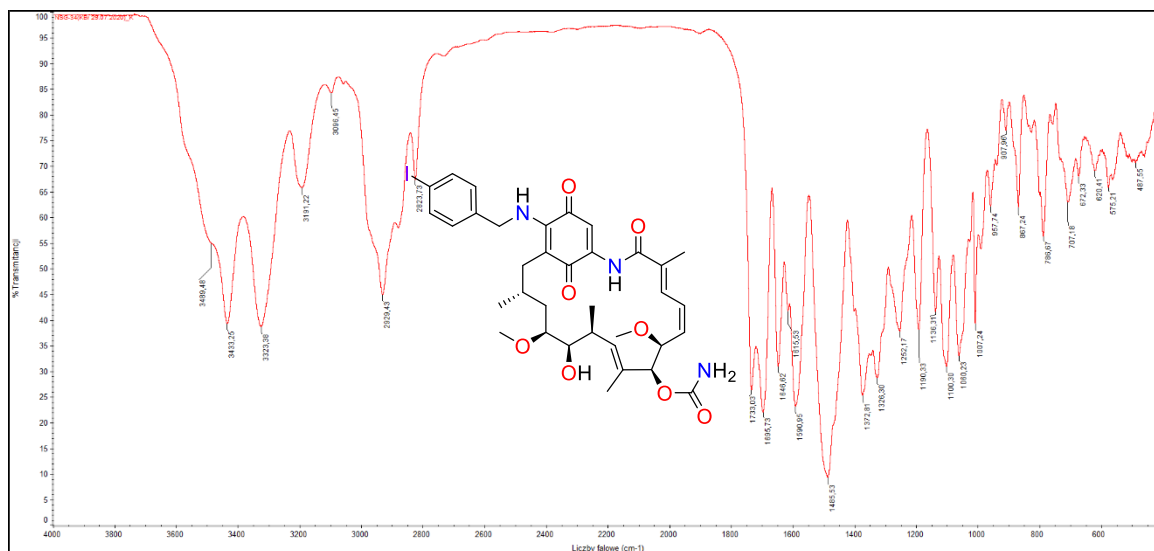

**Figure S32** FT-IR spectrum of compound **5** (in KBr).



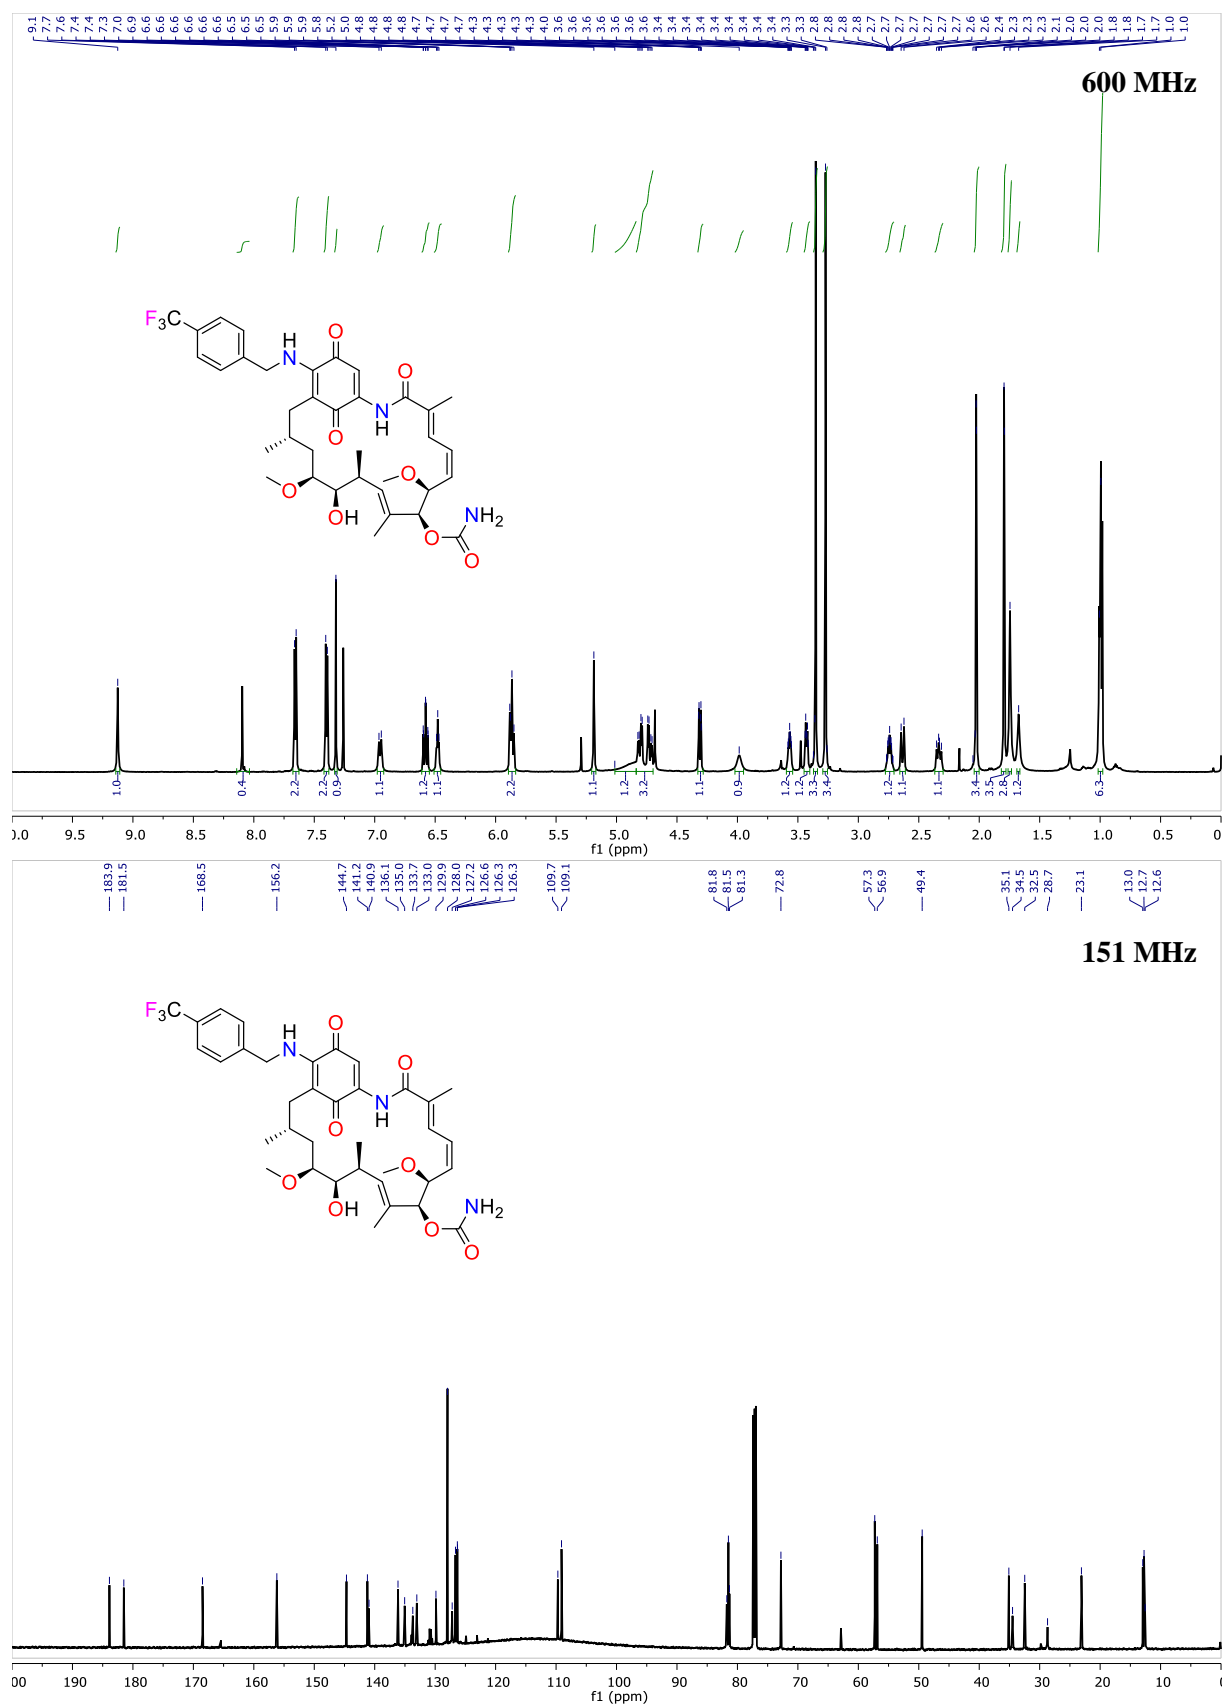

Figure S33  $^1\text{H}$  and  $^{13}\text{C}\{^1\text{H}\}$  spectra of compound 6 in  $\text{CDCl}_3$ .

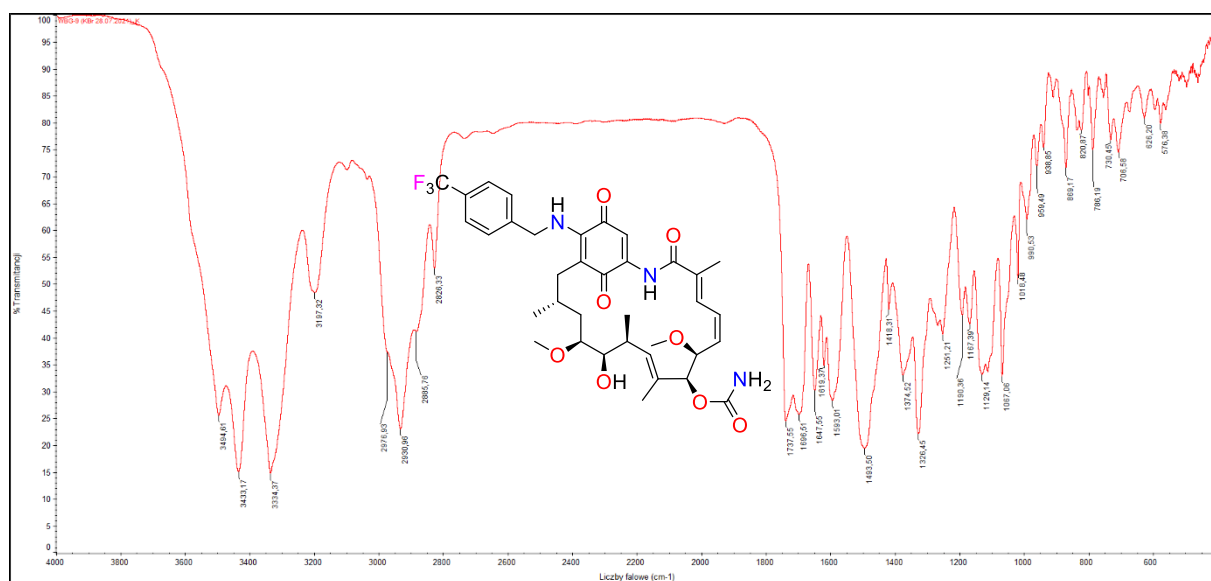

**Figure S34** FT-IR spectrum of compound **6** (in KBr).

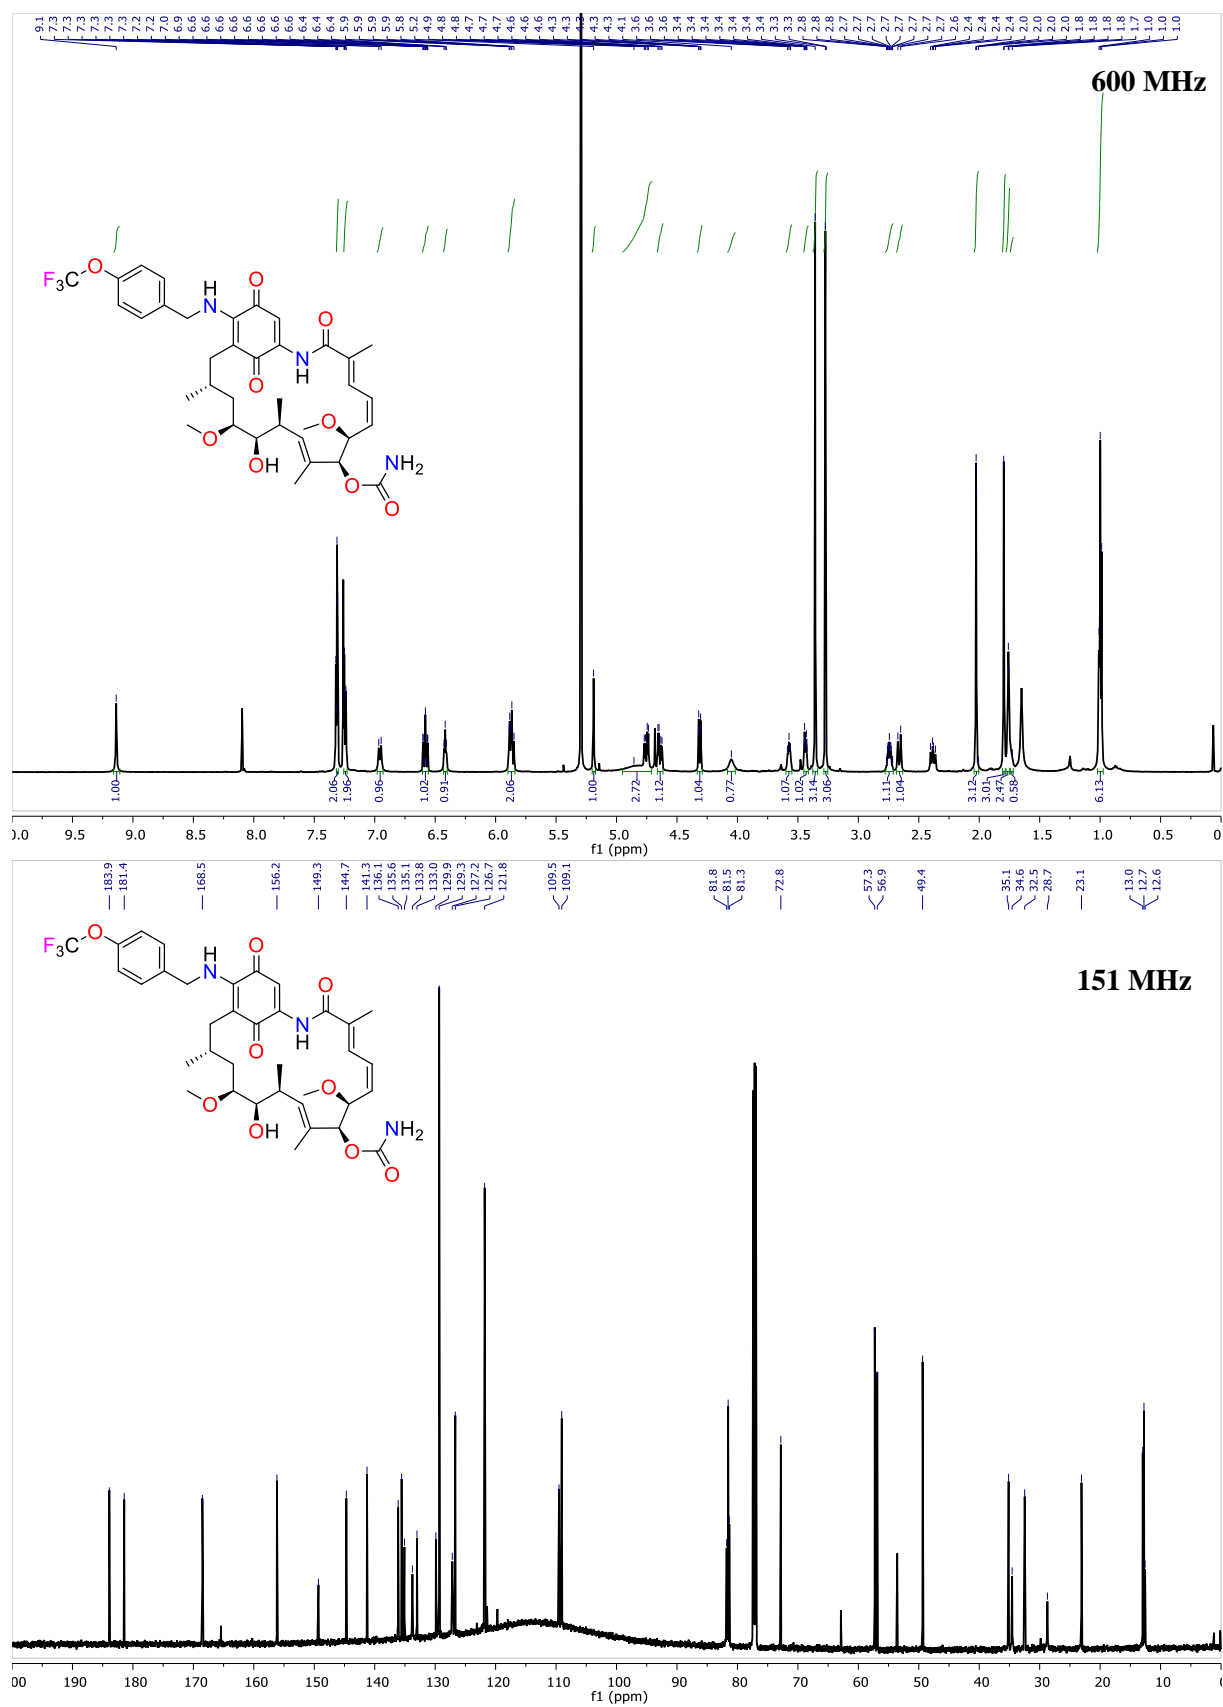

Figure S35  $^1\text{H}$  and  $^{13}\text{C}\{^1\text{H}\}$  spectra of compound 7 in  $\text{CDCl}_3$ .

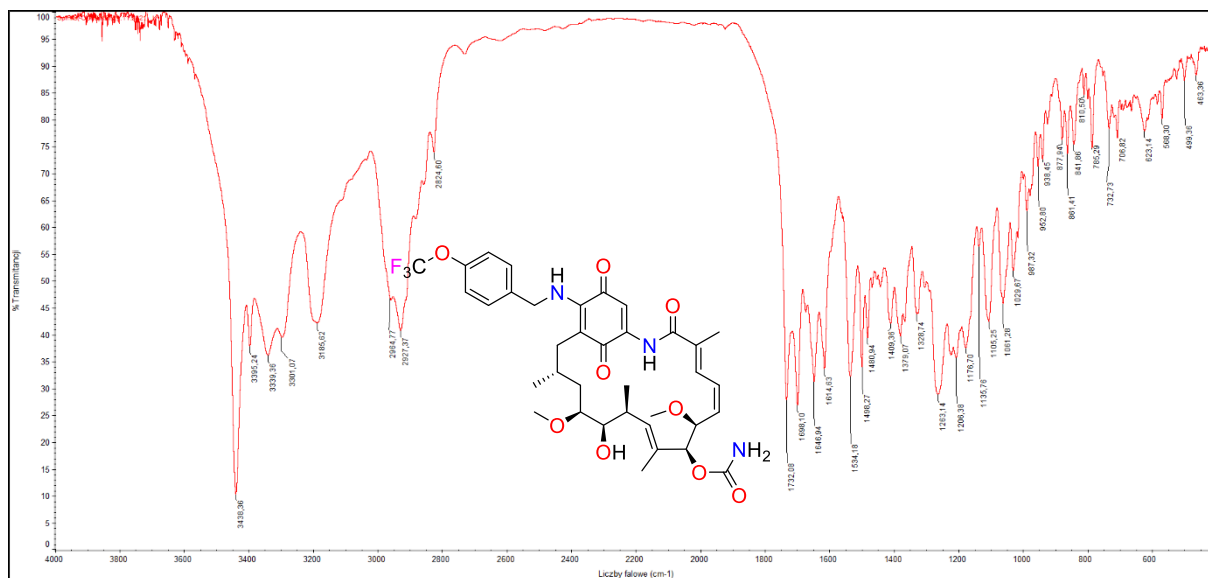

Figure S36 FT-IR spectrum of compound 7 (in KBr).



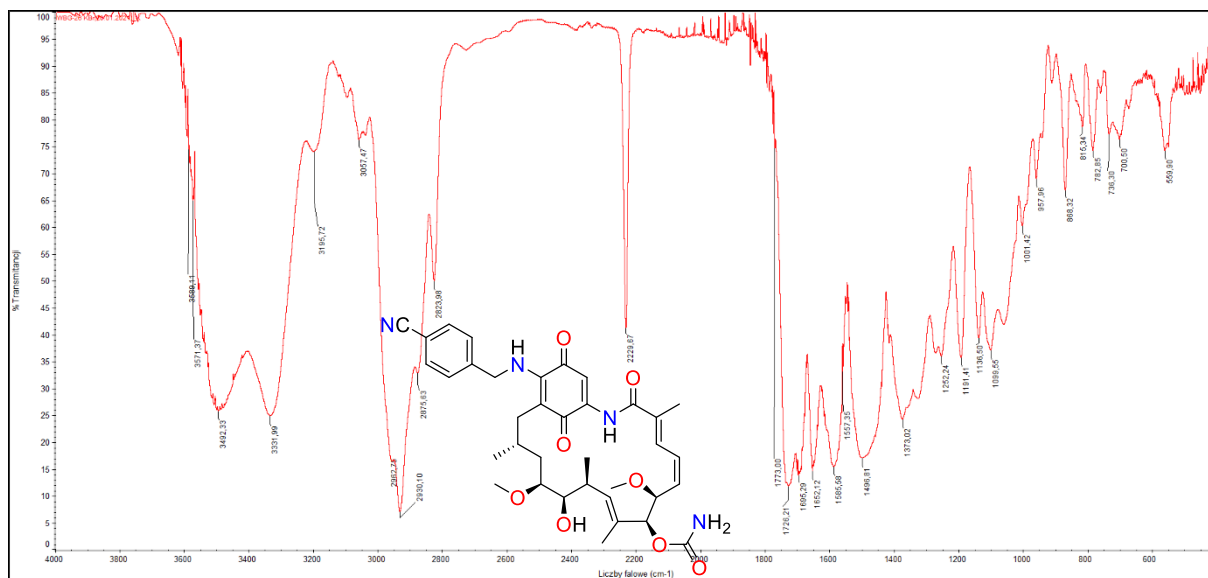

**Figure S38** FT-IR spectrum of compound **8** (in KBr).



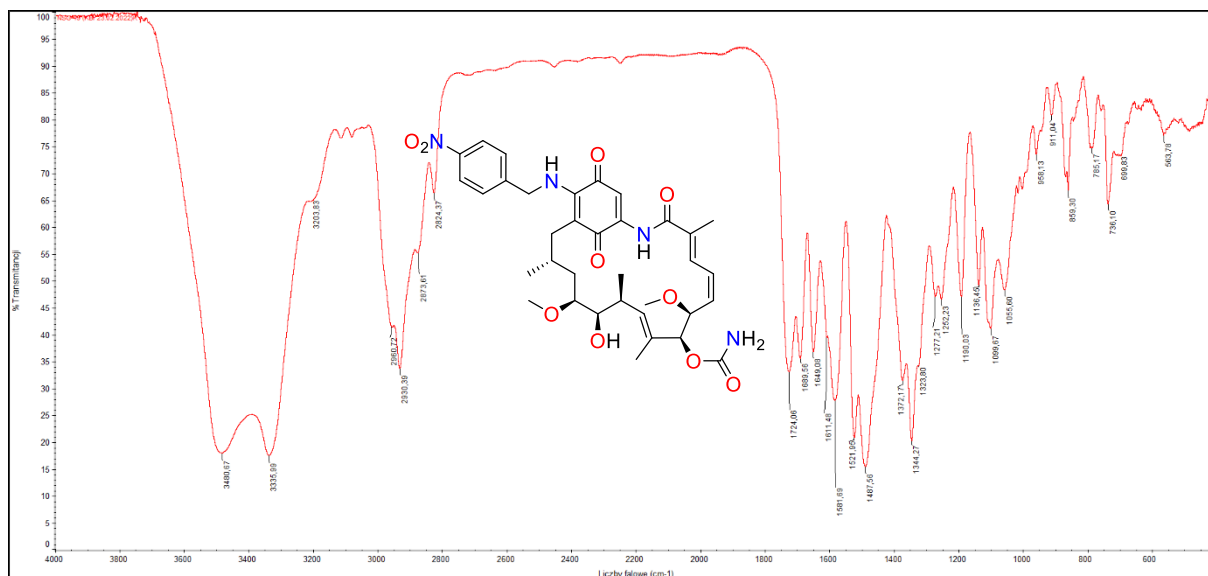

**Figure S40** FT-IR spectrum of compound **9** (in KBr).



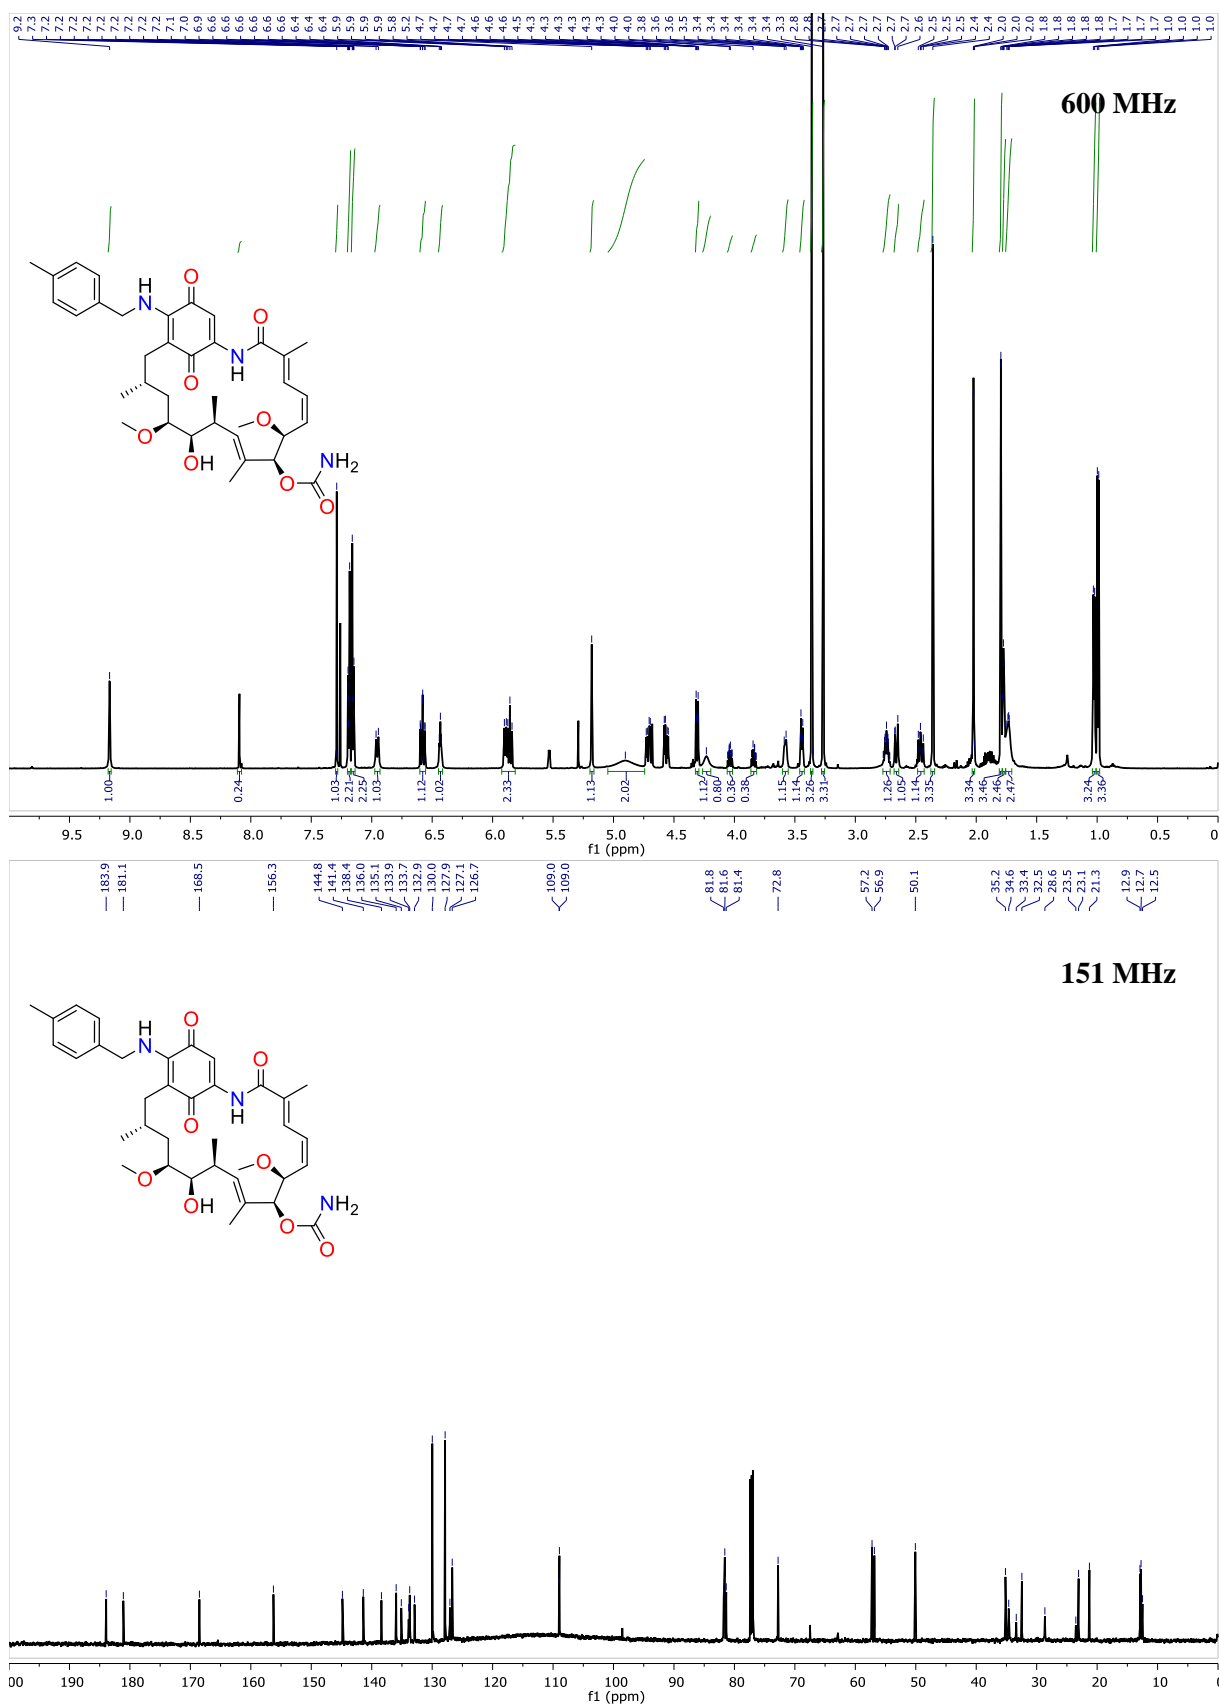

**Figure S41**  $^1\text{H}$  and  $^{13}\text{C}\{^1\text{H}\}$  spectra of compound **10** in  $\text{CDCl}_3$ .

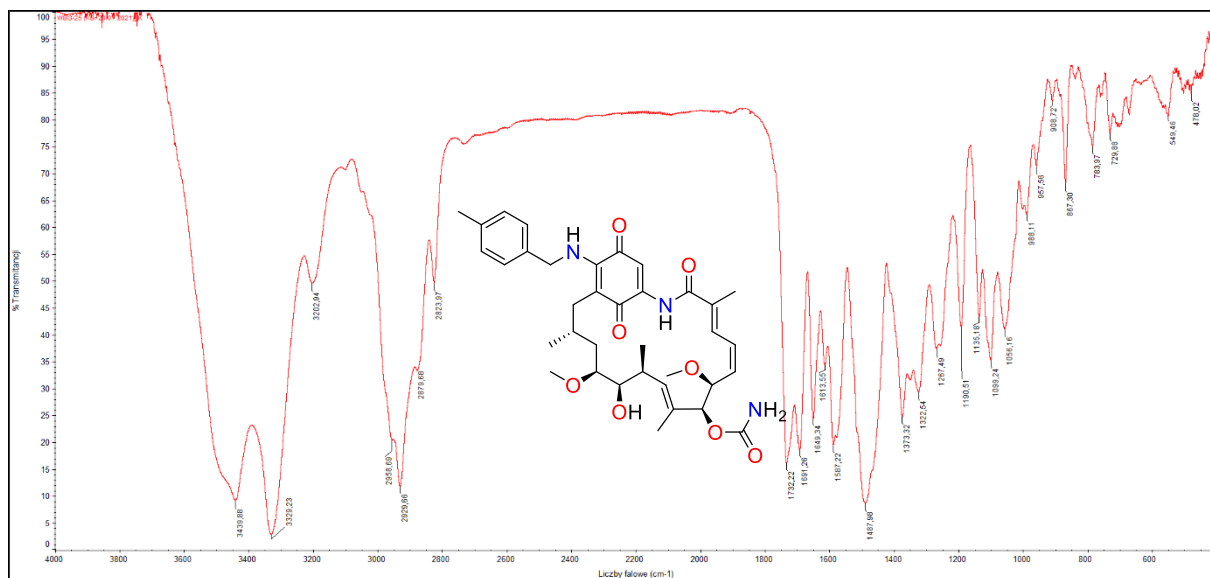

**Figure S42** FT-IR spectrum of compound **10** (in KBr).

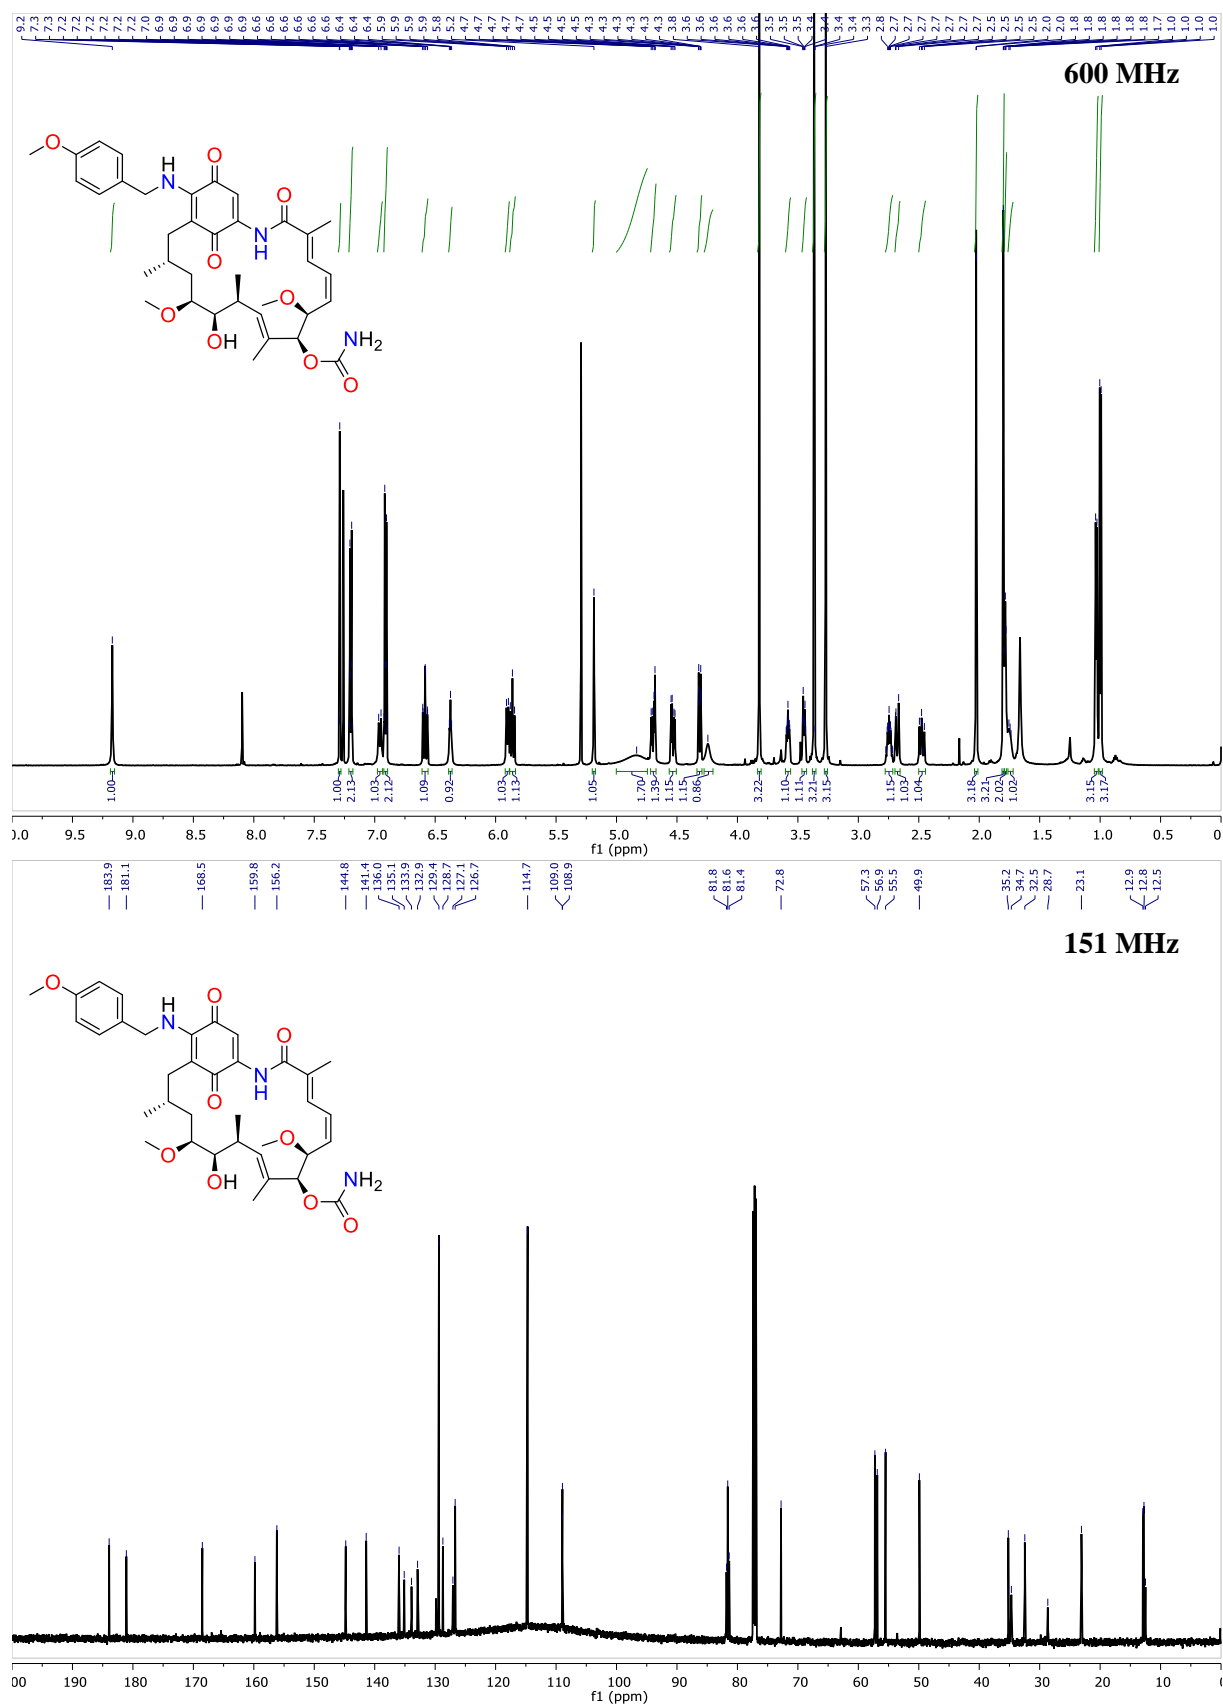

**Figure S43**  $^1\text{H}$  and  $^{13}\text{C}\{^1\text{H}\}$  spectra of compound 11 in  $\text{CDCl}_3$ .

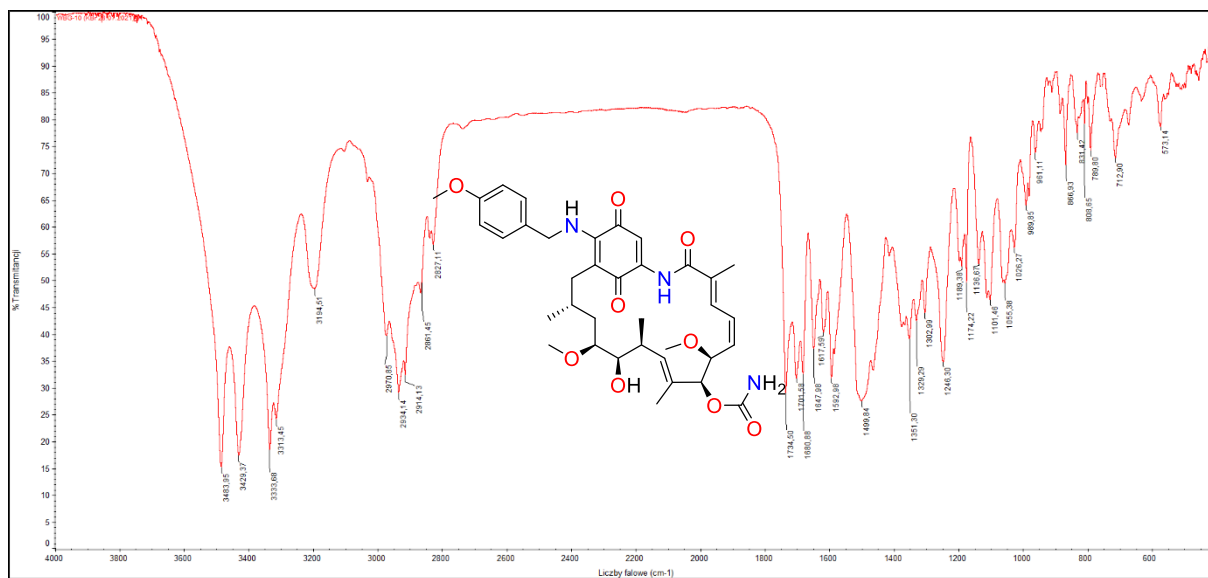

**Figure S44** FT-IR spectrum of compound **11** (in KBr).

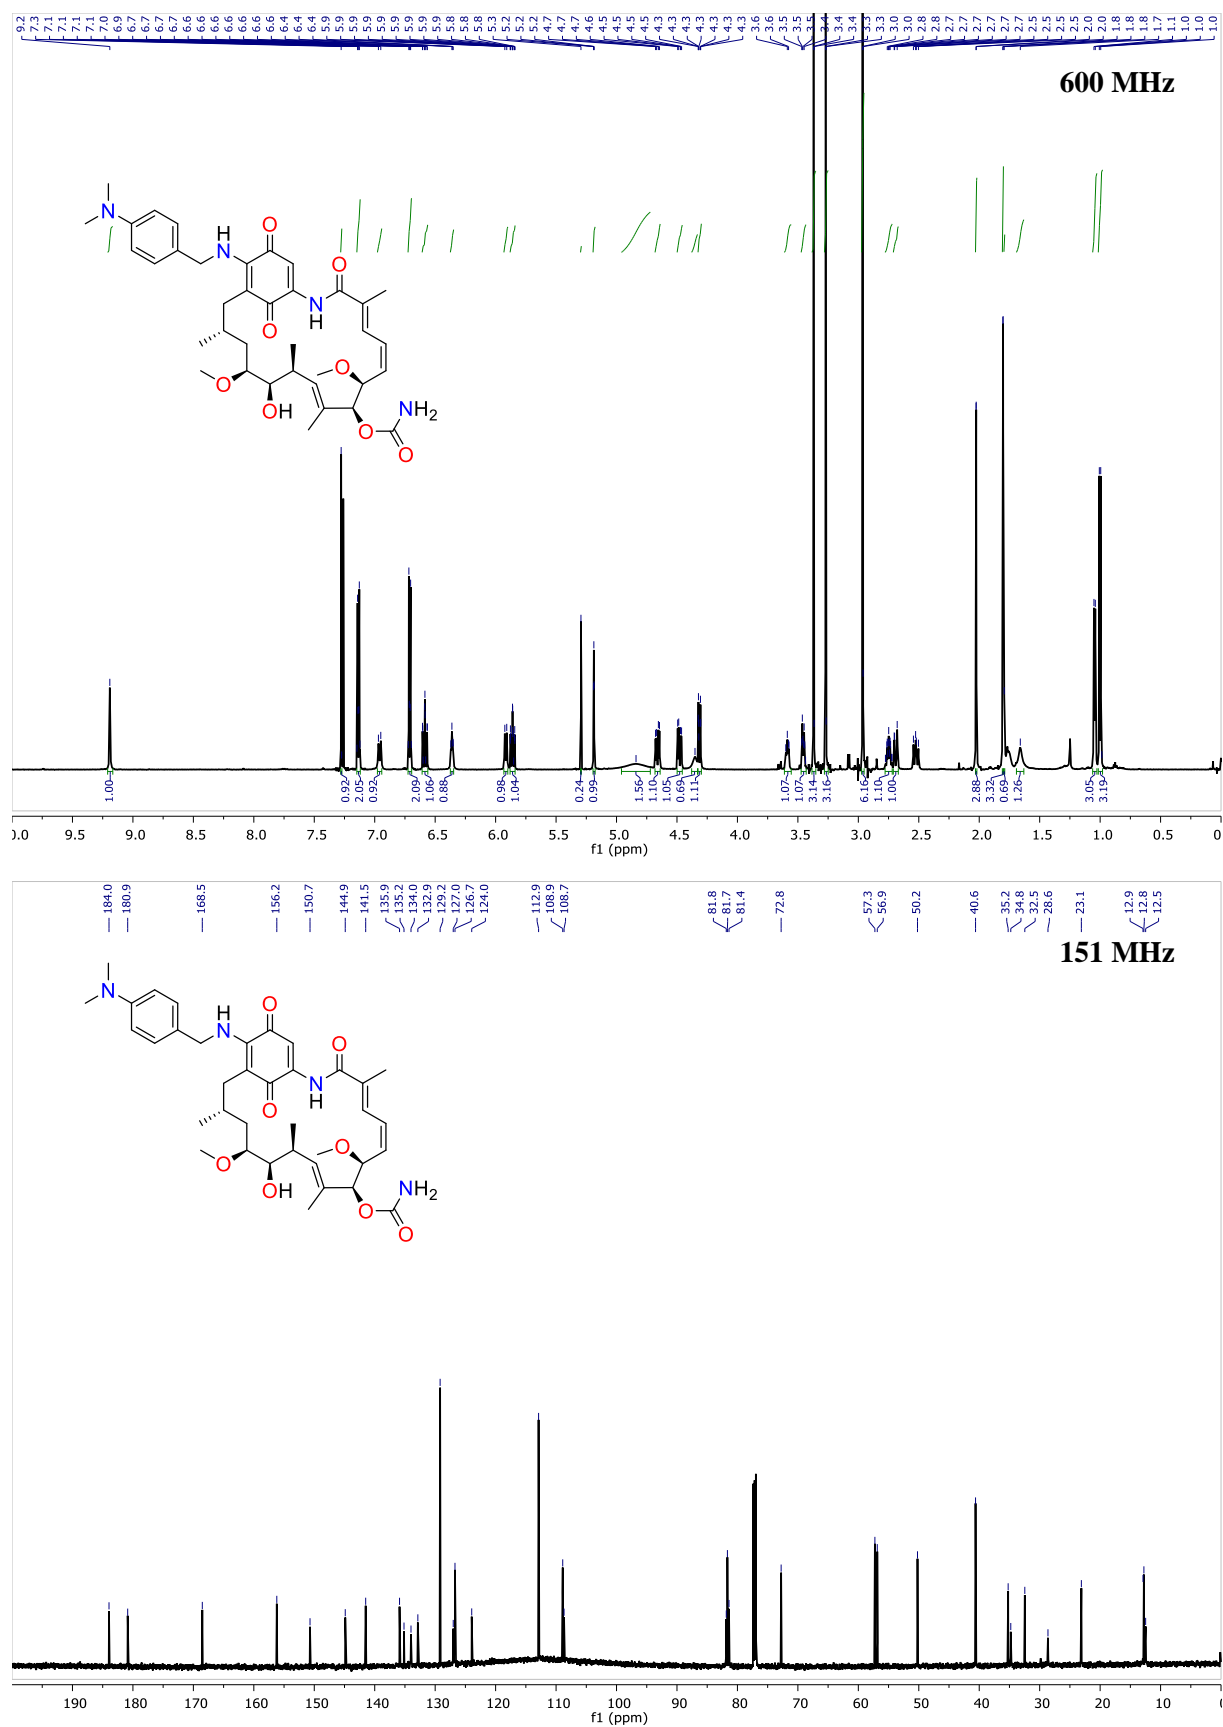

Figure S45  $^1\text{H}$  and  $^{13}\text{C}\{^1\text{H}\}$  spectra of compound 12 in  $\text{CDCl}_3$ .

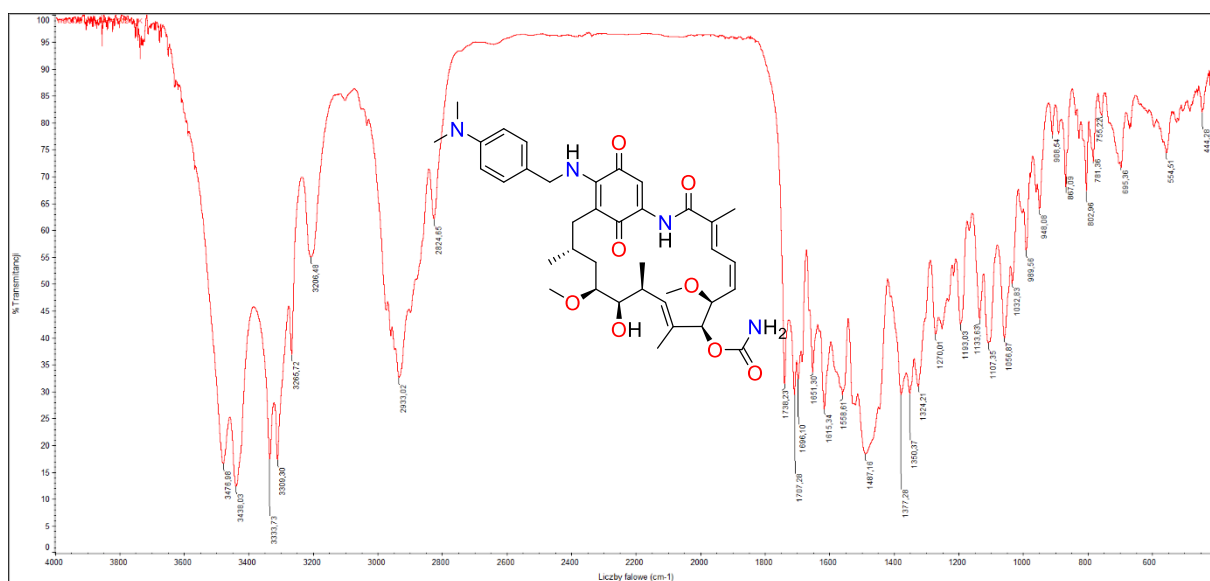

**Figure S46** FT-IR spectrum of compound **12** (in KBr).

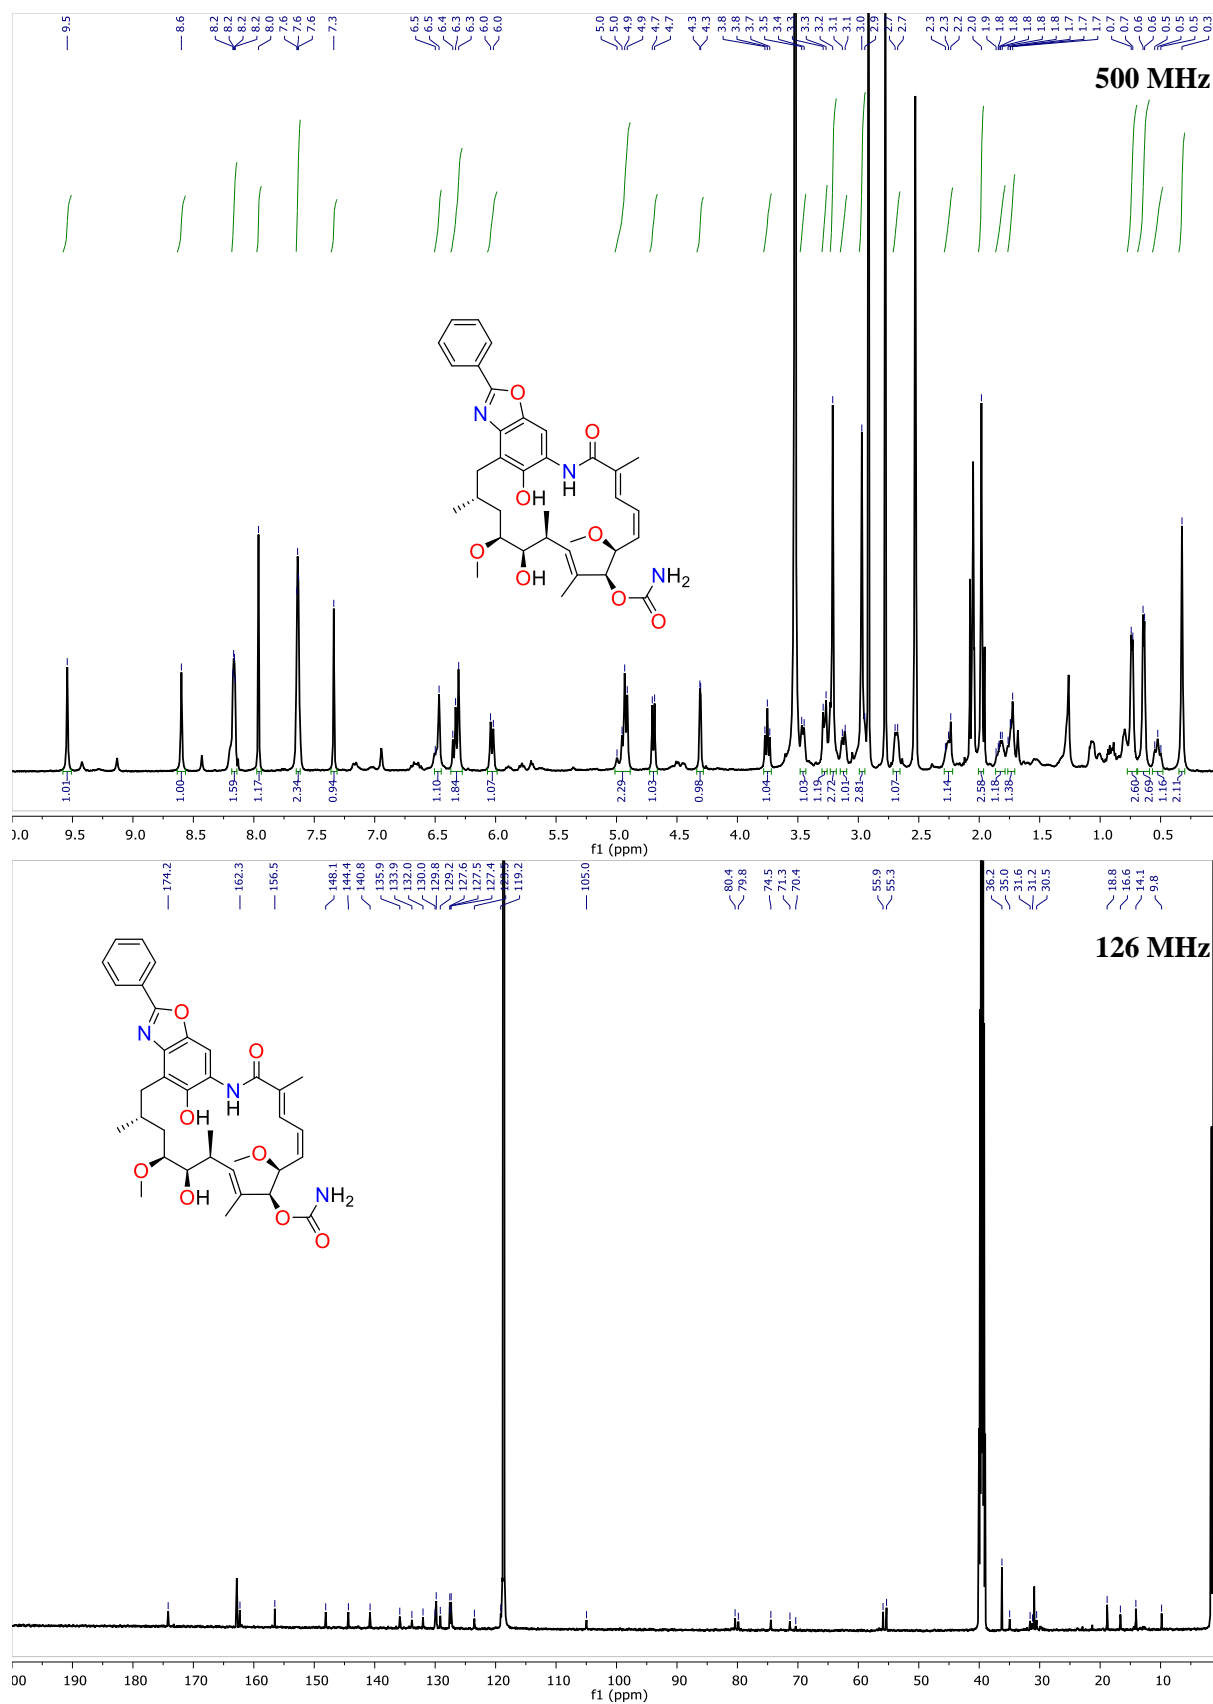

**Figure S47**  $^1\text{H}$  and  $^{13}\text{C}\{^1\text{H}\}$  spectra of compound **1a** in DMSO- $d_6$ + ACN- $d_3$ .

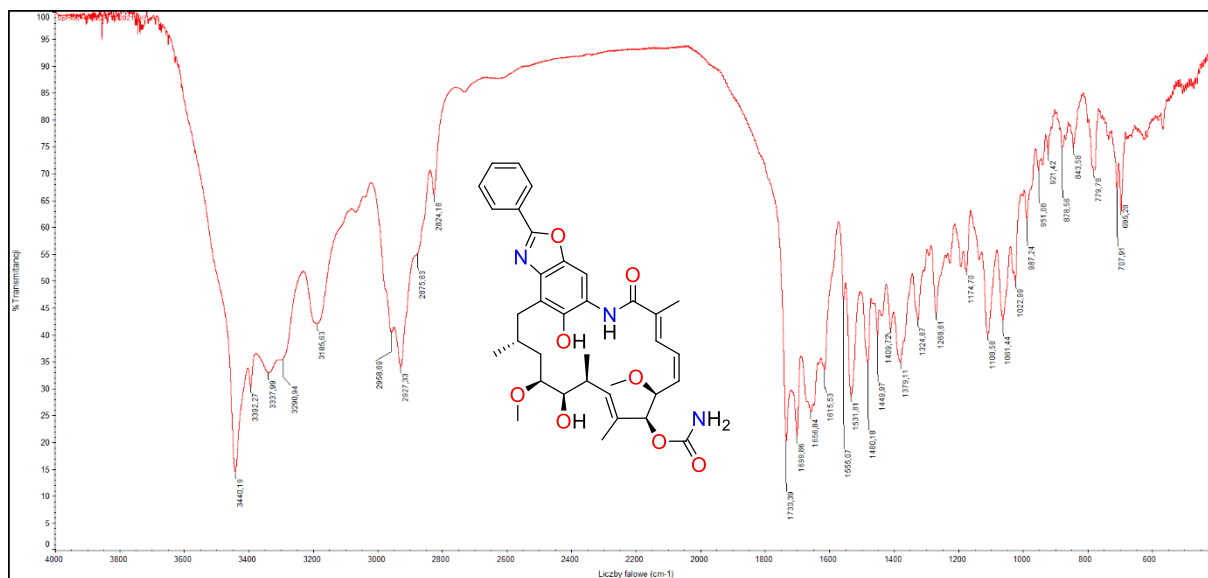

**Figure S48** FT-IR spectrum of compound **1a** (in KBr).



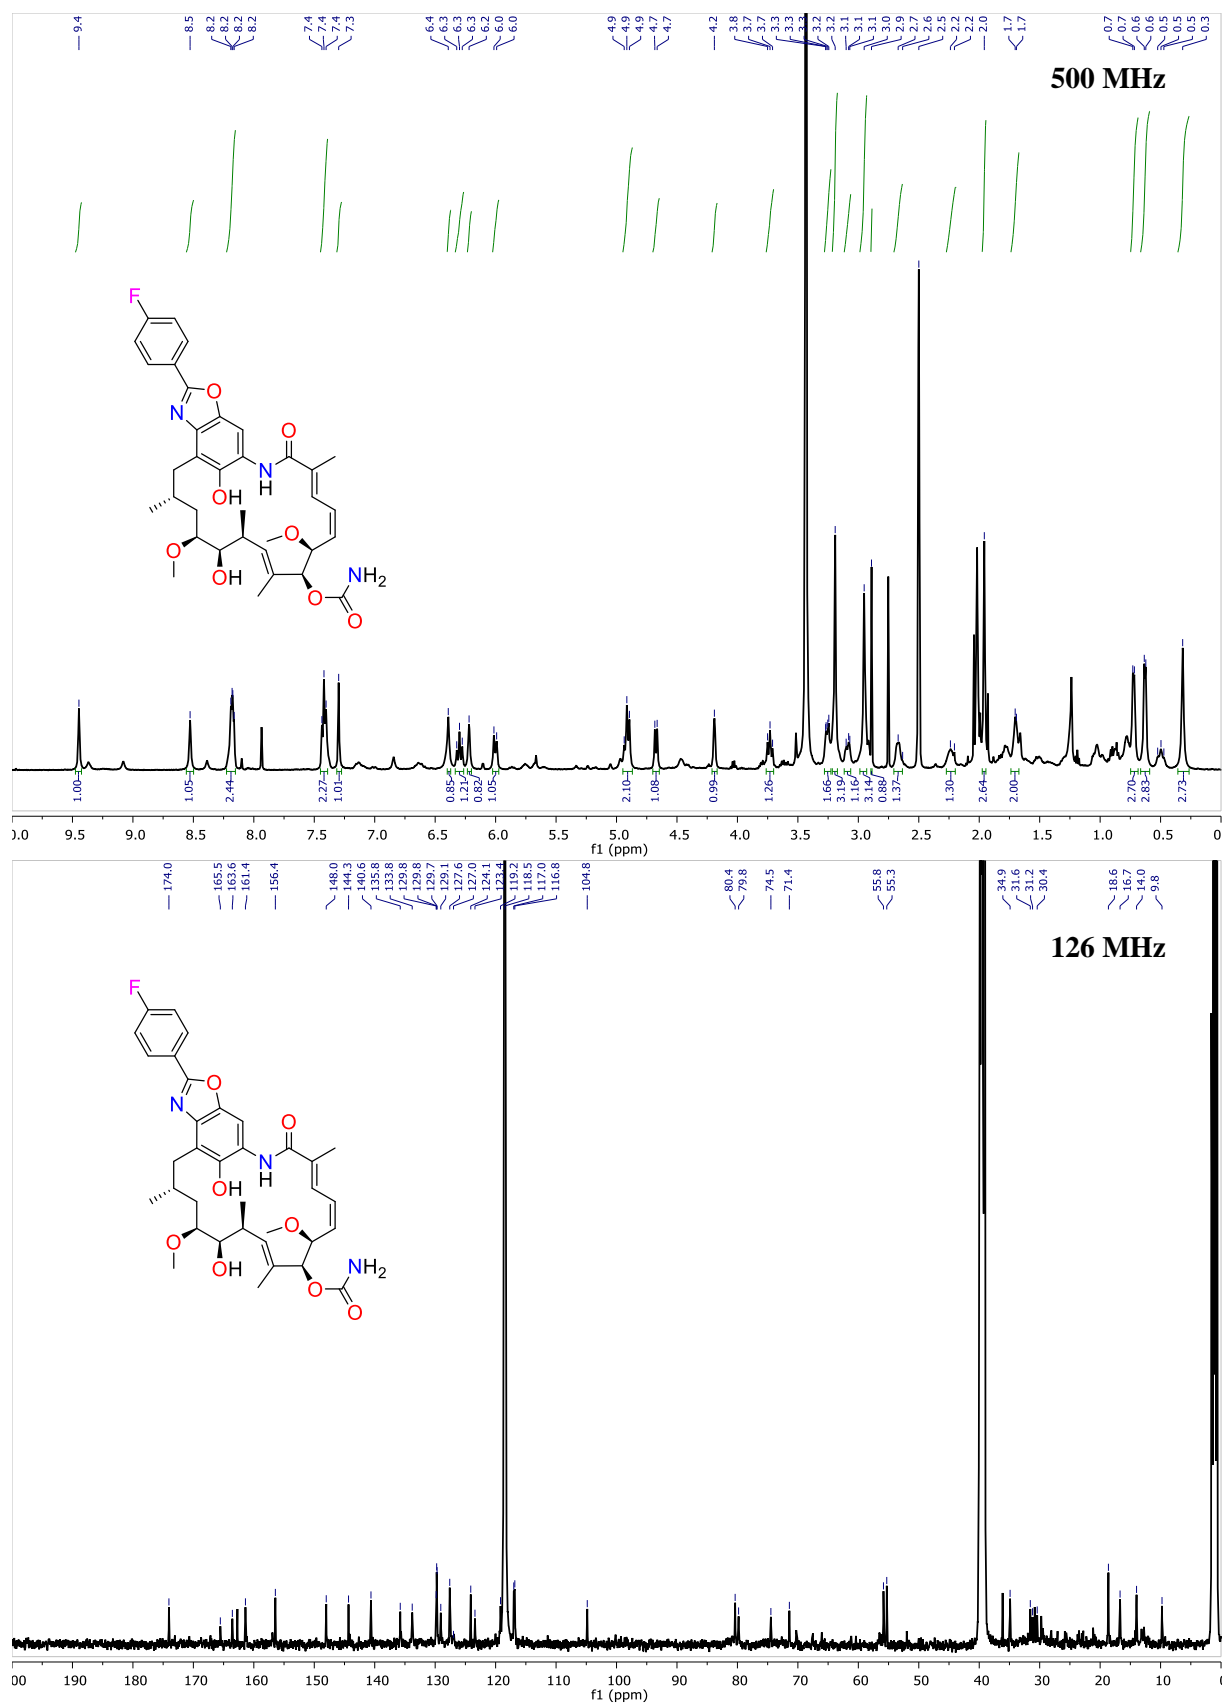

**Figure S49**  $^1\text{H}$  and  $^{13}\text{C}\{^1\text{H}\}$  spectra of compound **2a** in  $\text{DMSO-}d_6 + \text{ACN-}d_3$ .

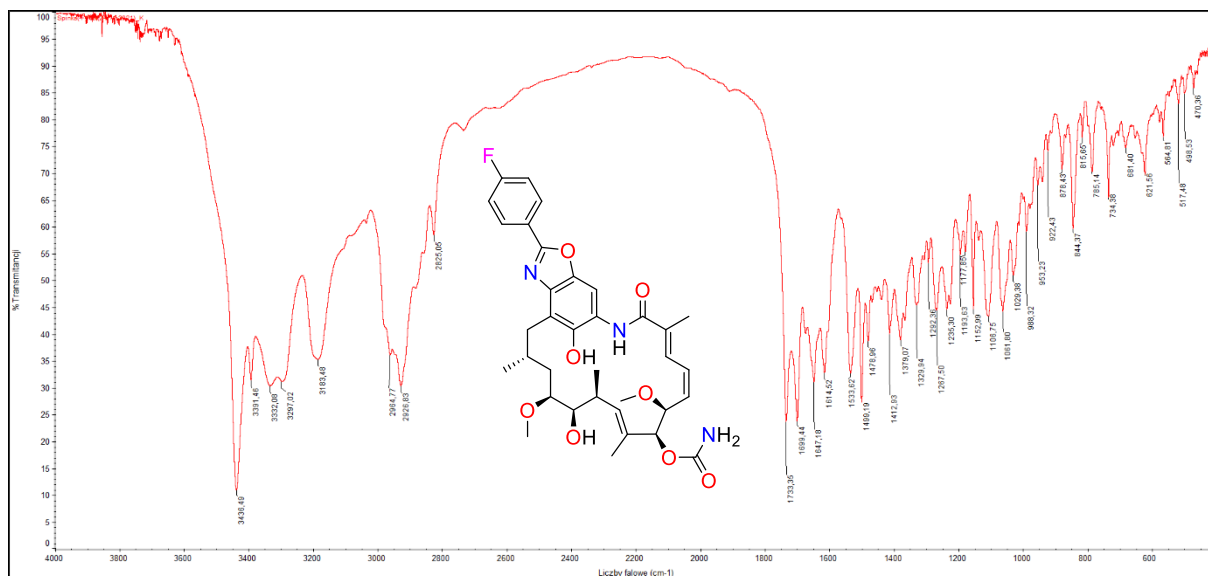

**Figure S50** FT-IR spectrum of compound **2a** (in KBr).

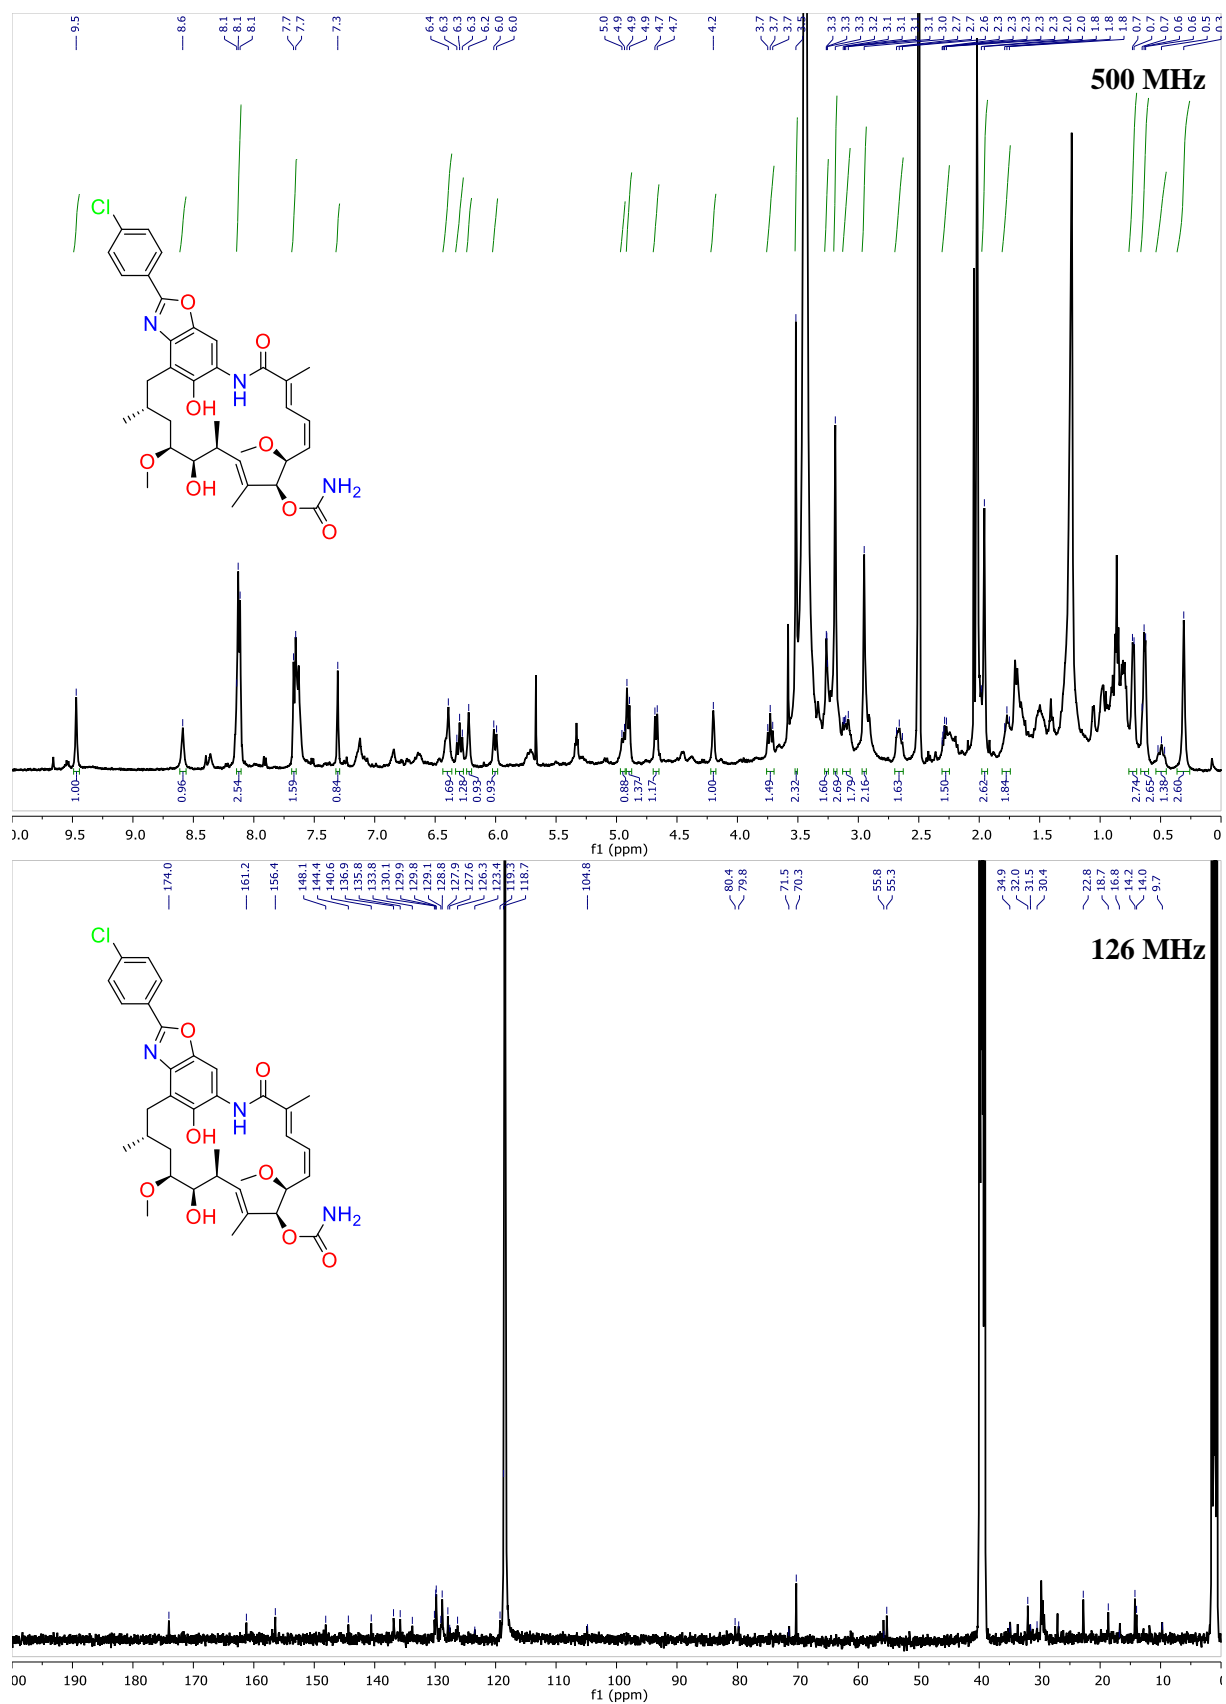

**Figure S51**  $^1\text{H}$  and  $^{13}\text{C}\{^1\text{H}\}$  spectra of compound **3a** in  $\text{DMSO-}d_6 + \text{ACN-}d_3$ .

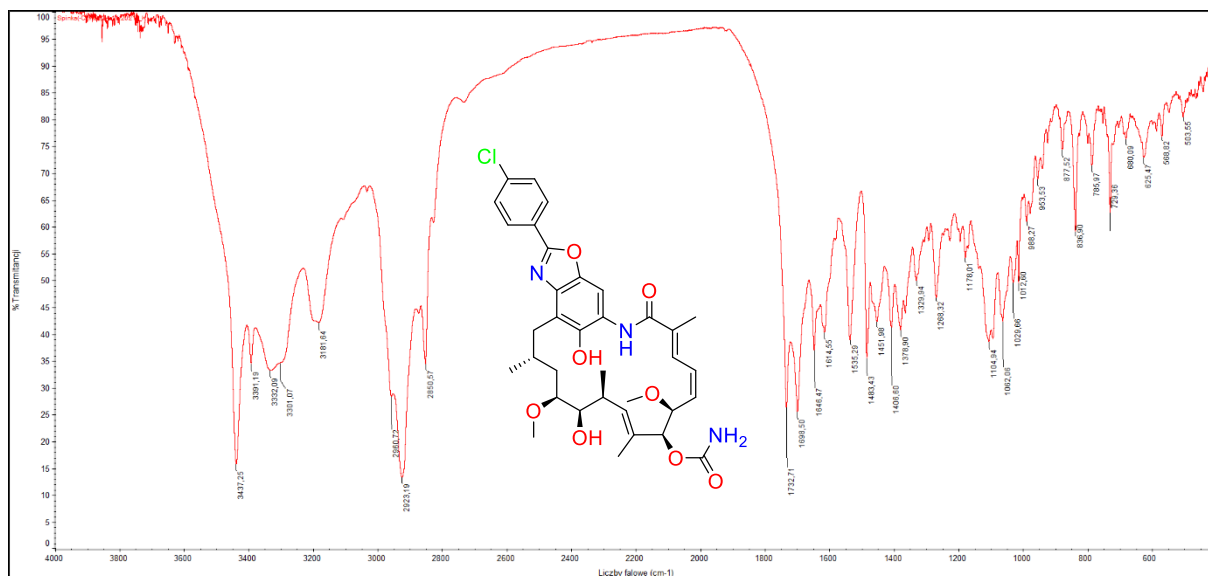

**Figure S52** FT-IR spectrum of compound **3a** (in KBr).

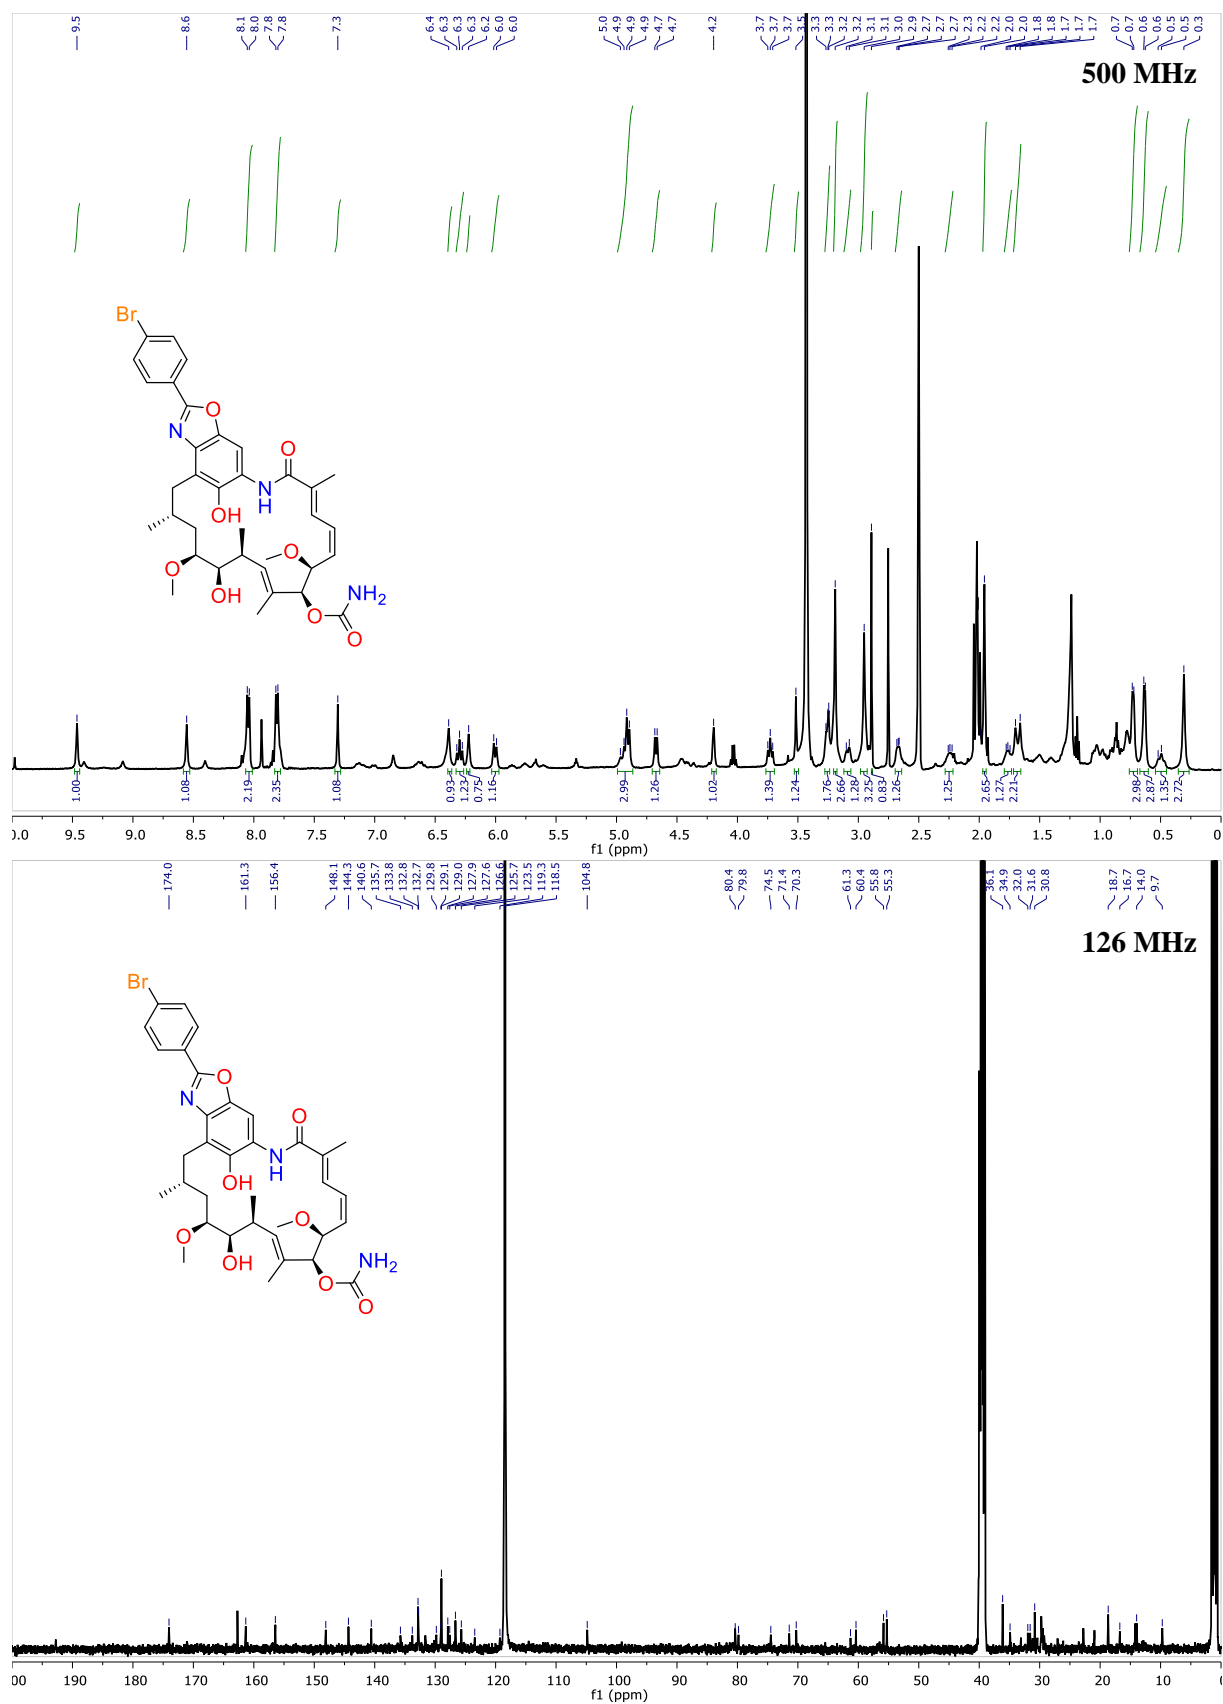

**Figure S53**  $^1\text{H}$  and  $^{13}\text{C}\{^1\text{H}\}$  spectra of compound **4a** in  $\text{DMSO-}d_6 + \text{ACN-}d_3$ .

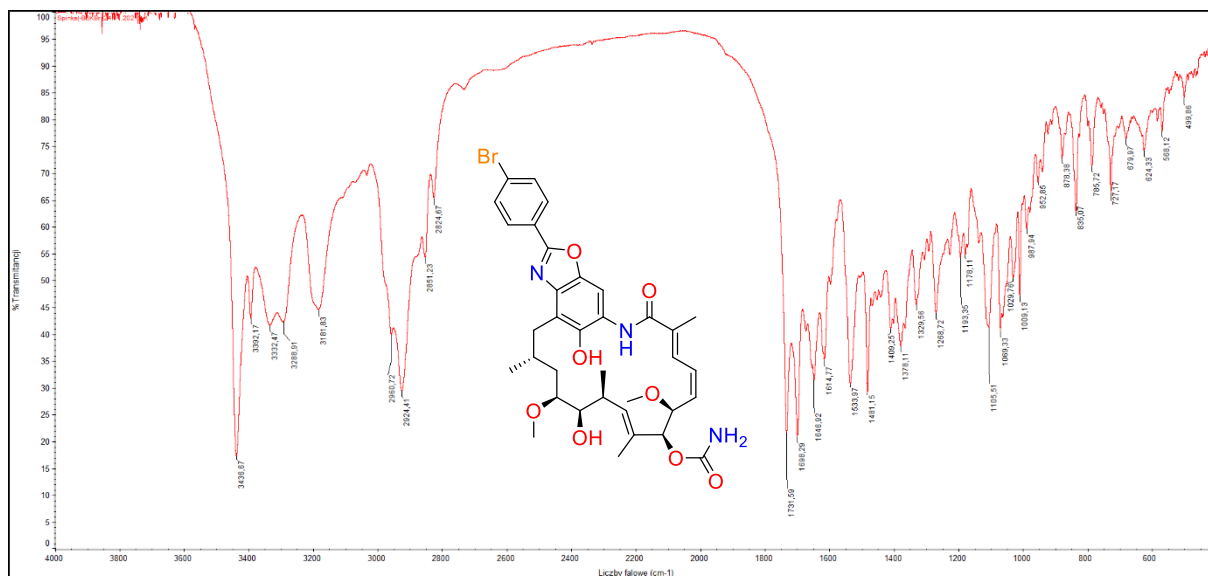

Figure S54 FT-IR spectrum of compound 4a (in KBr).

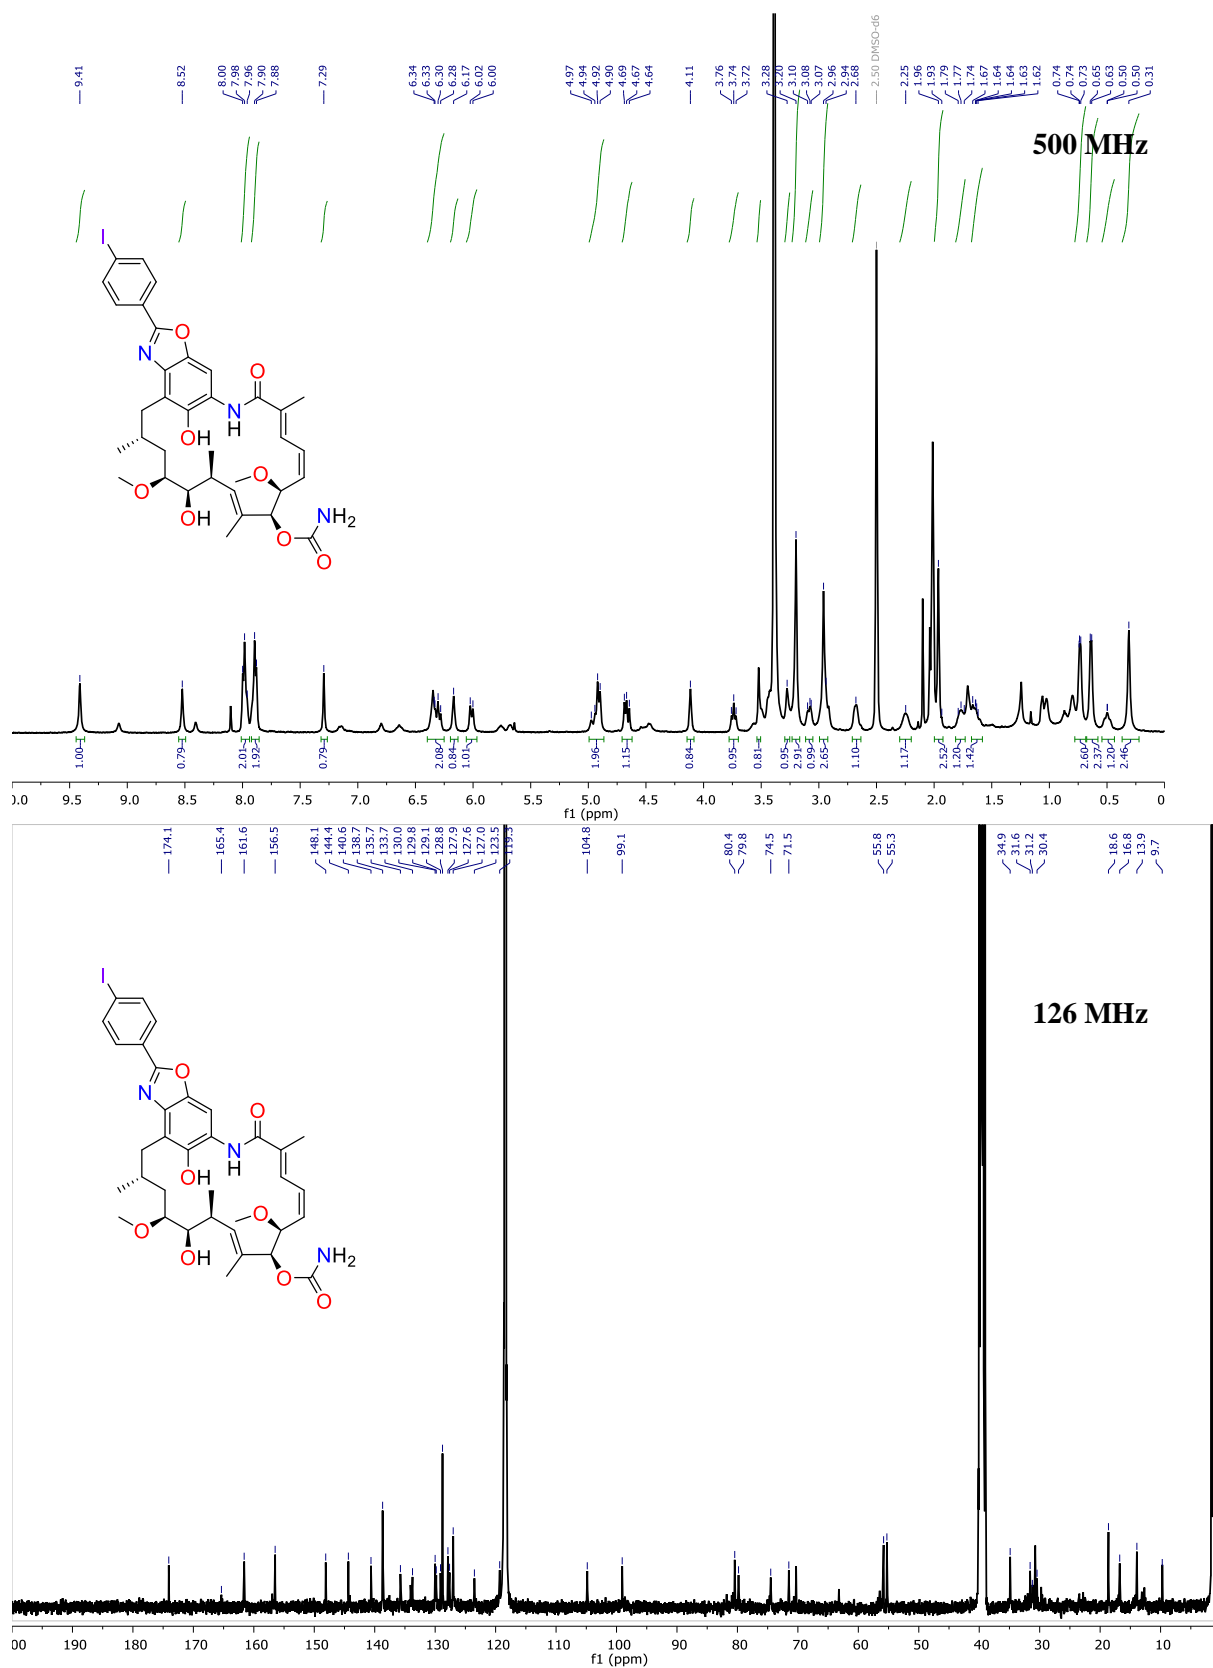

Figure S55  $^1\text{H}$  and  $^{13}\text{C}\{^1\text{H}\}$  spectra of compound **5a** in DMSO- $d_6$ + ACN- $d_3$ .

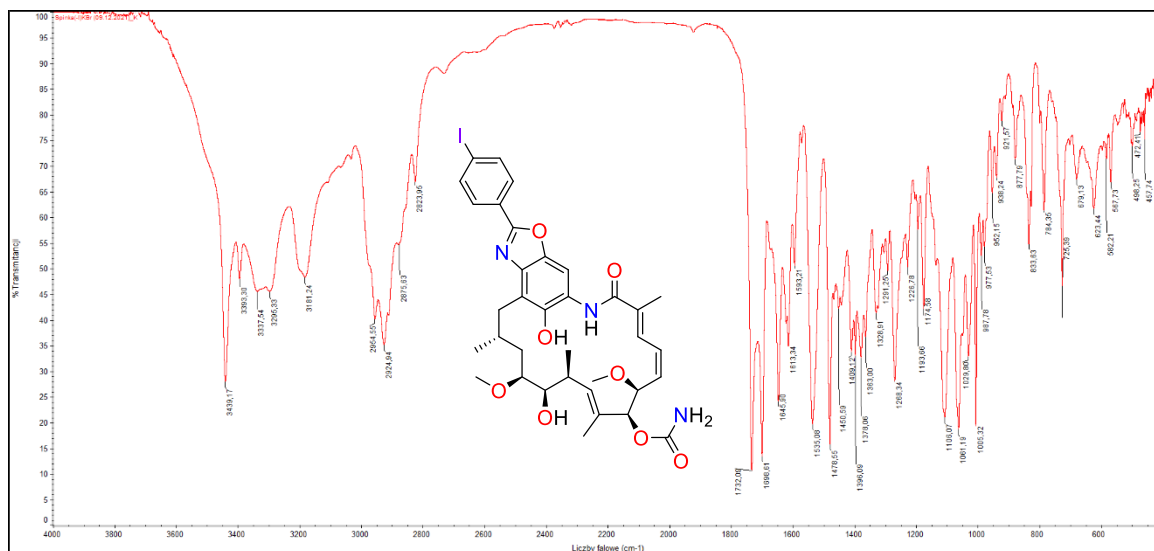

Figure S56 FT-IR spectrum of compound 5a (in KBr).



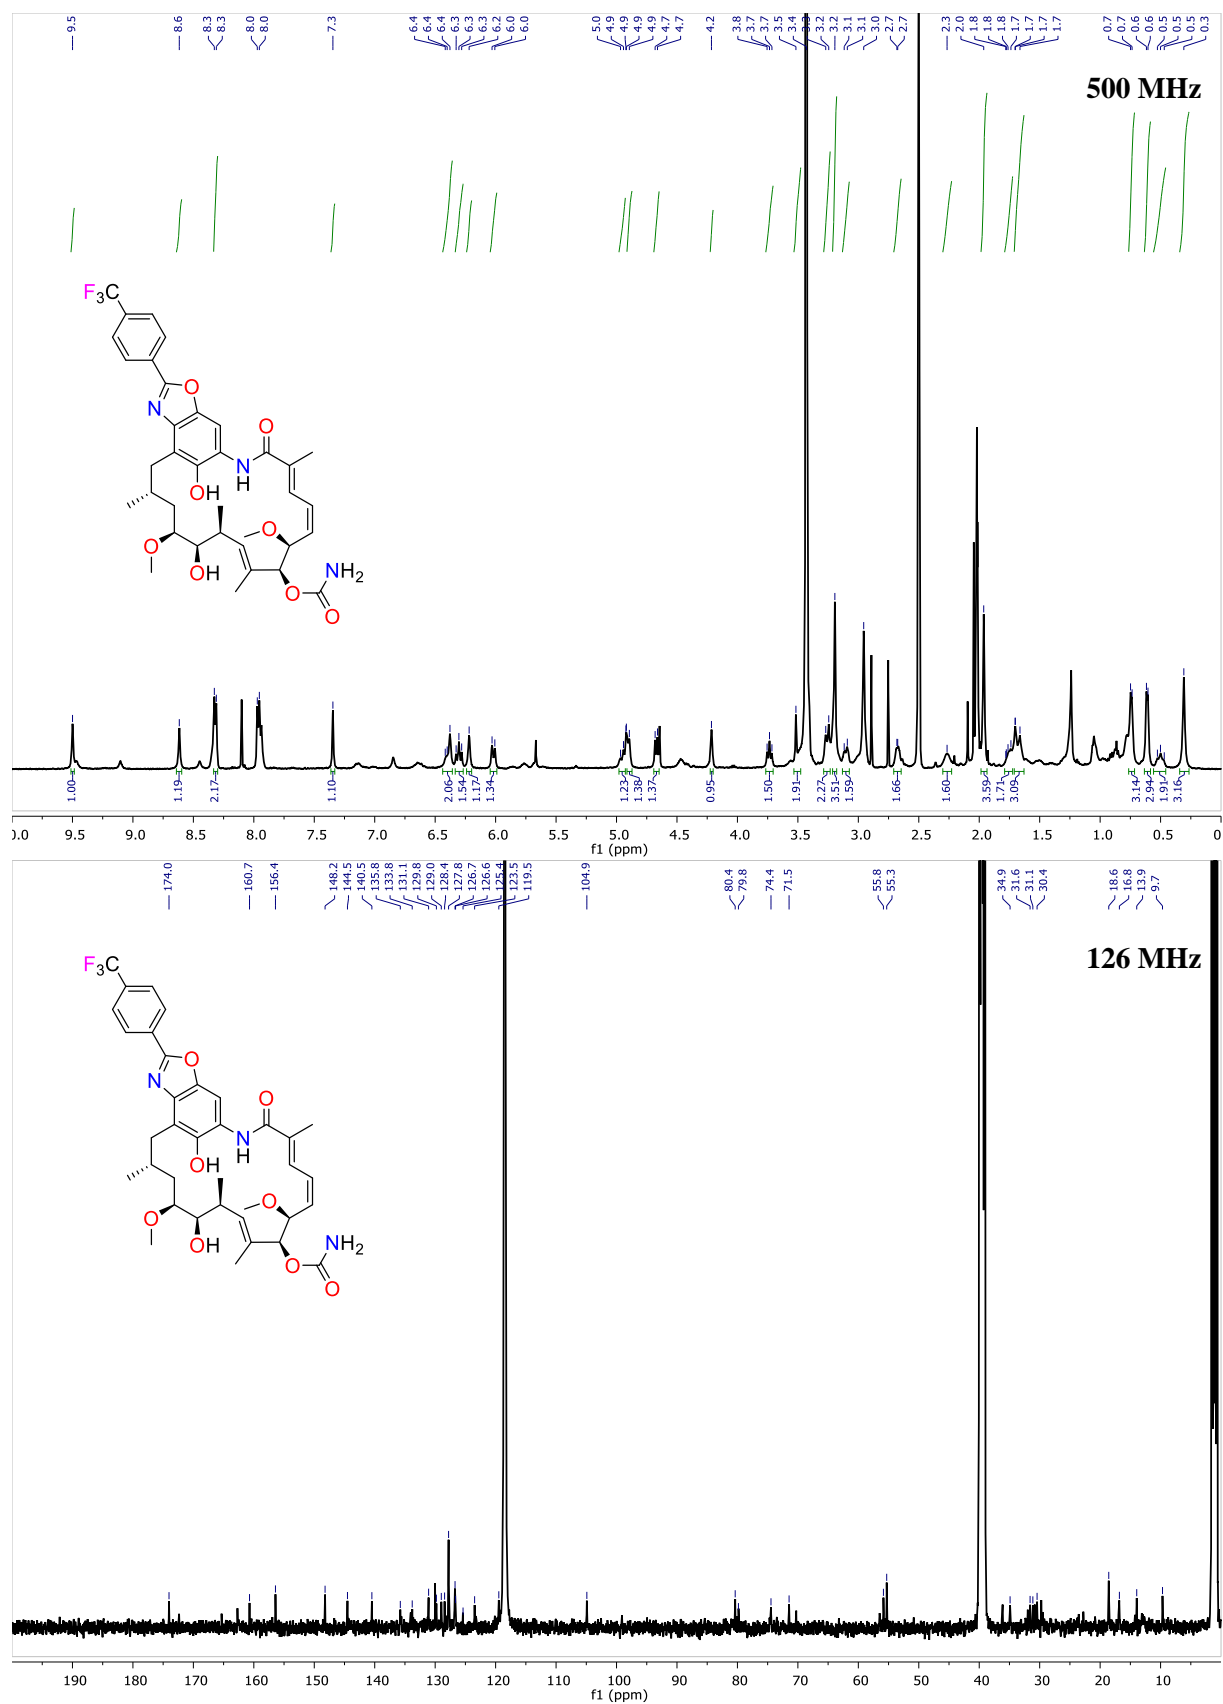

**Figure S57**  $^1\text{H}$  and  $^{13}\text{C}\{^1\text{H}\}$  spectra of compound **6a** in  $\text{DMSO-}d_6 + \text{ACN-}d_3$ .

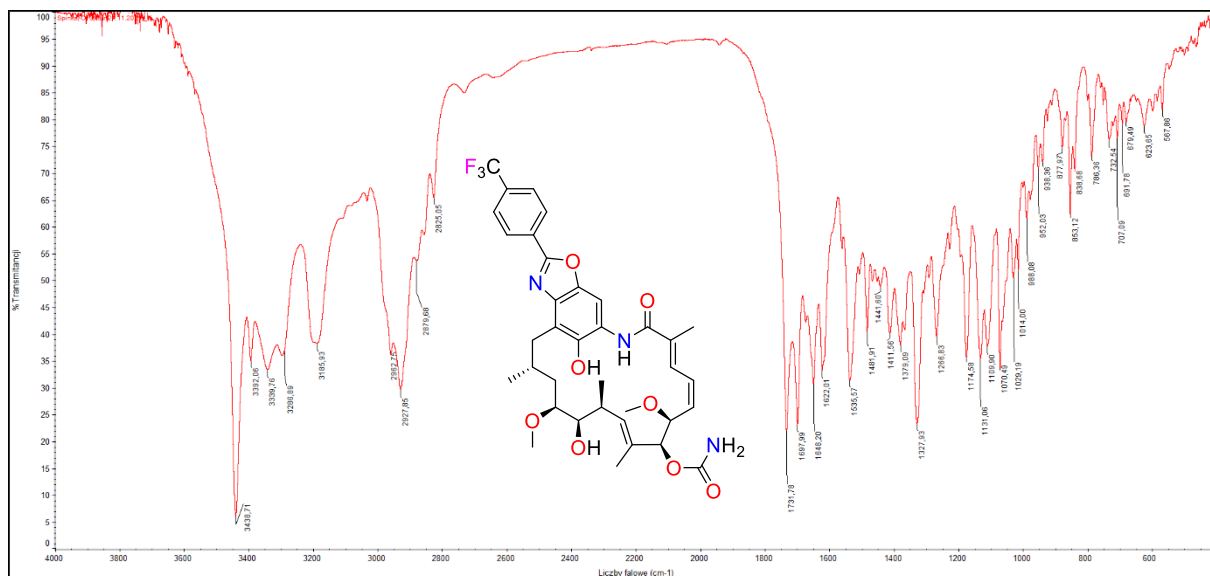

**Figure S58** FT-IR spectrum of compound **6a** (in KBr).

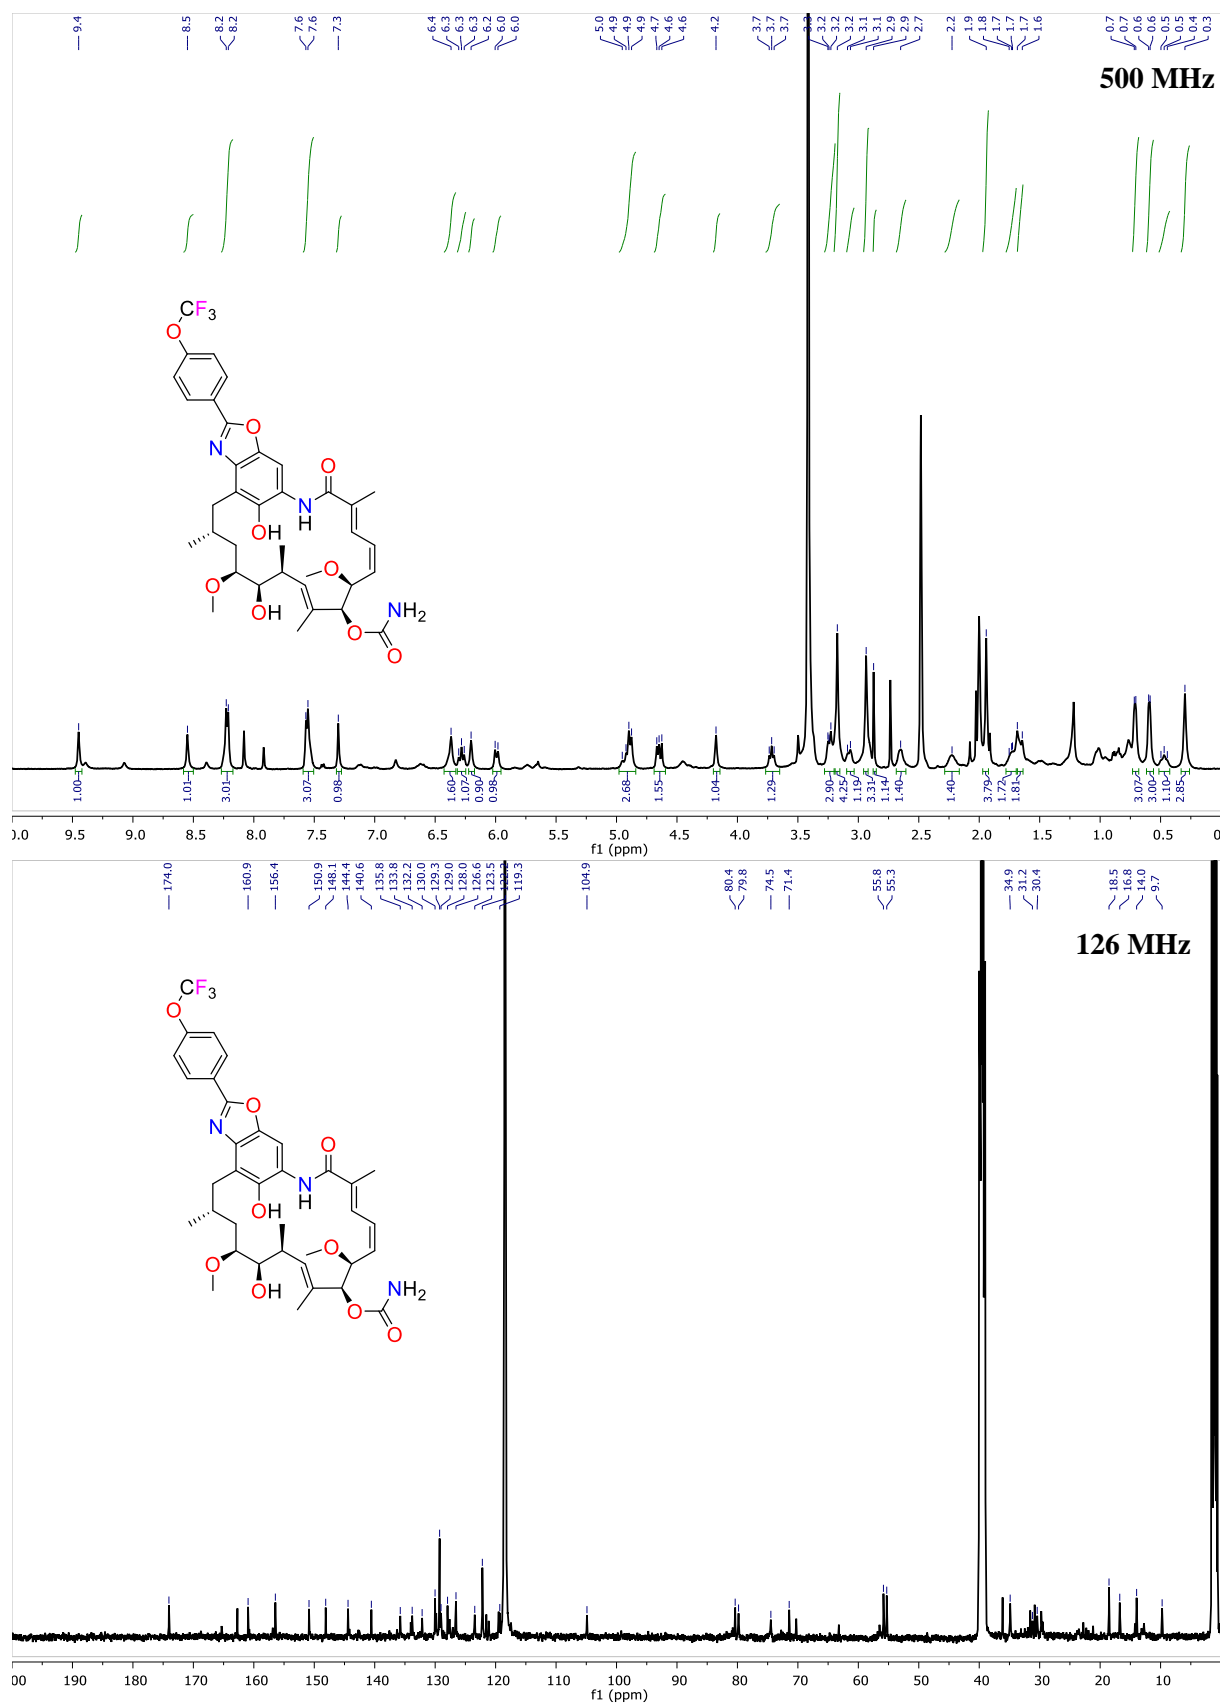

**Figure S59**  $^1\text{H}$  and  $^{13}\text{C}\{^1\text{H}\}$  spectra of compound **7a** in  $\text{DMSO-}d_6 + \text{ACN-}d_3$ .

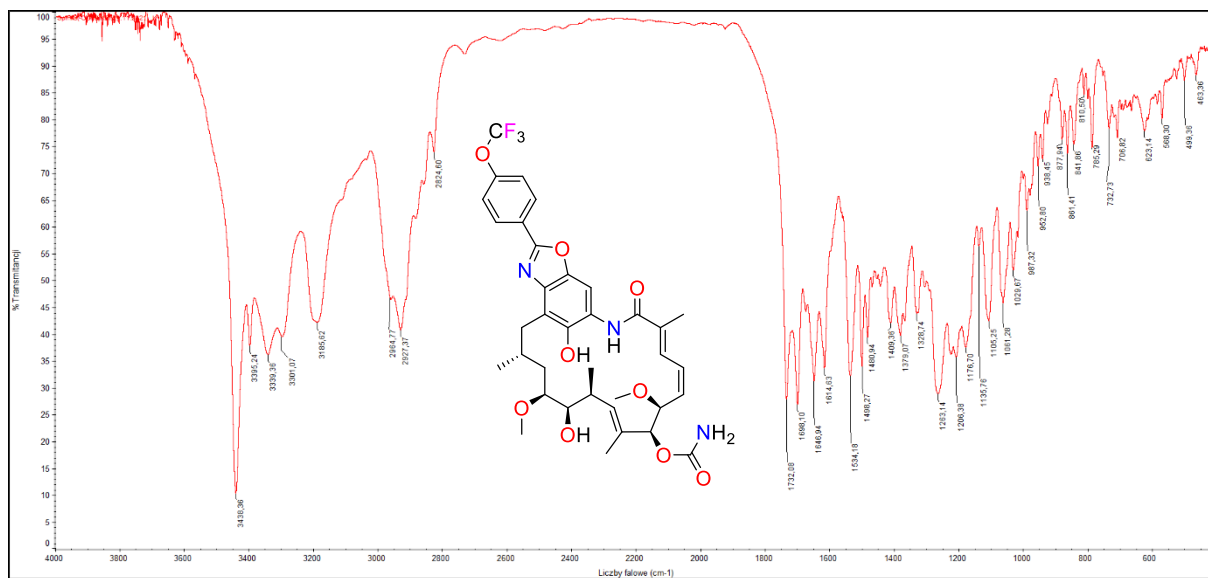

**Figure S60** FT-IR spectrum of compound **7a** (in KBr).

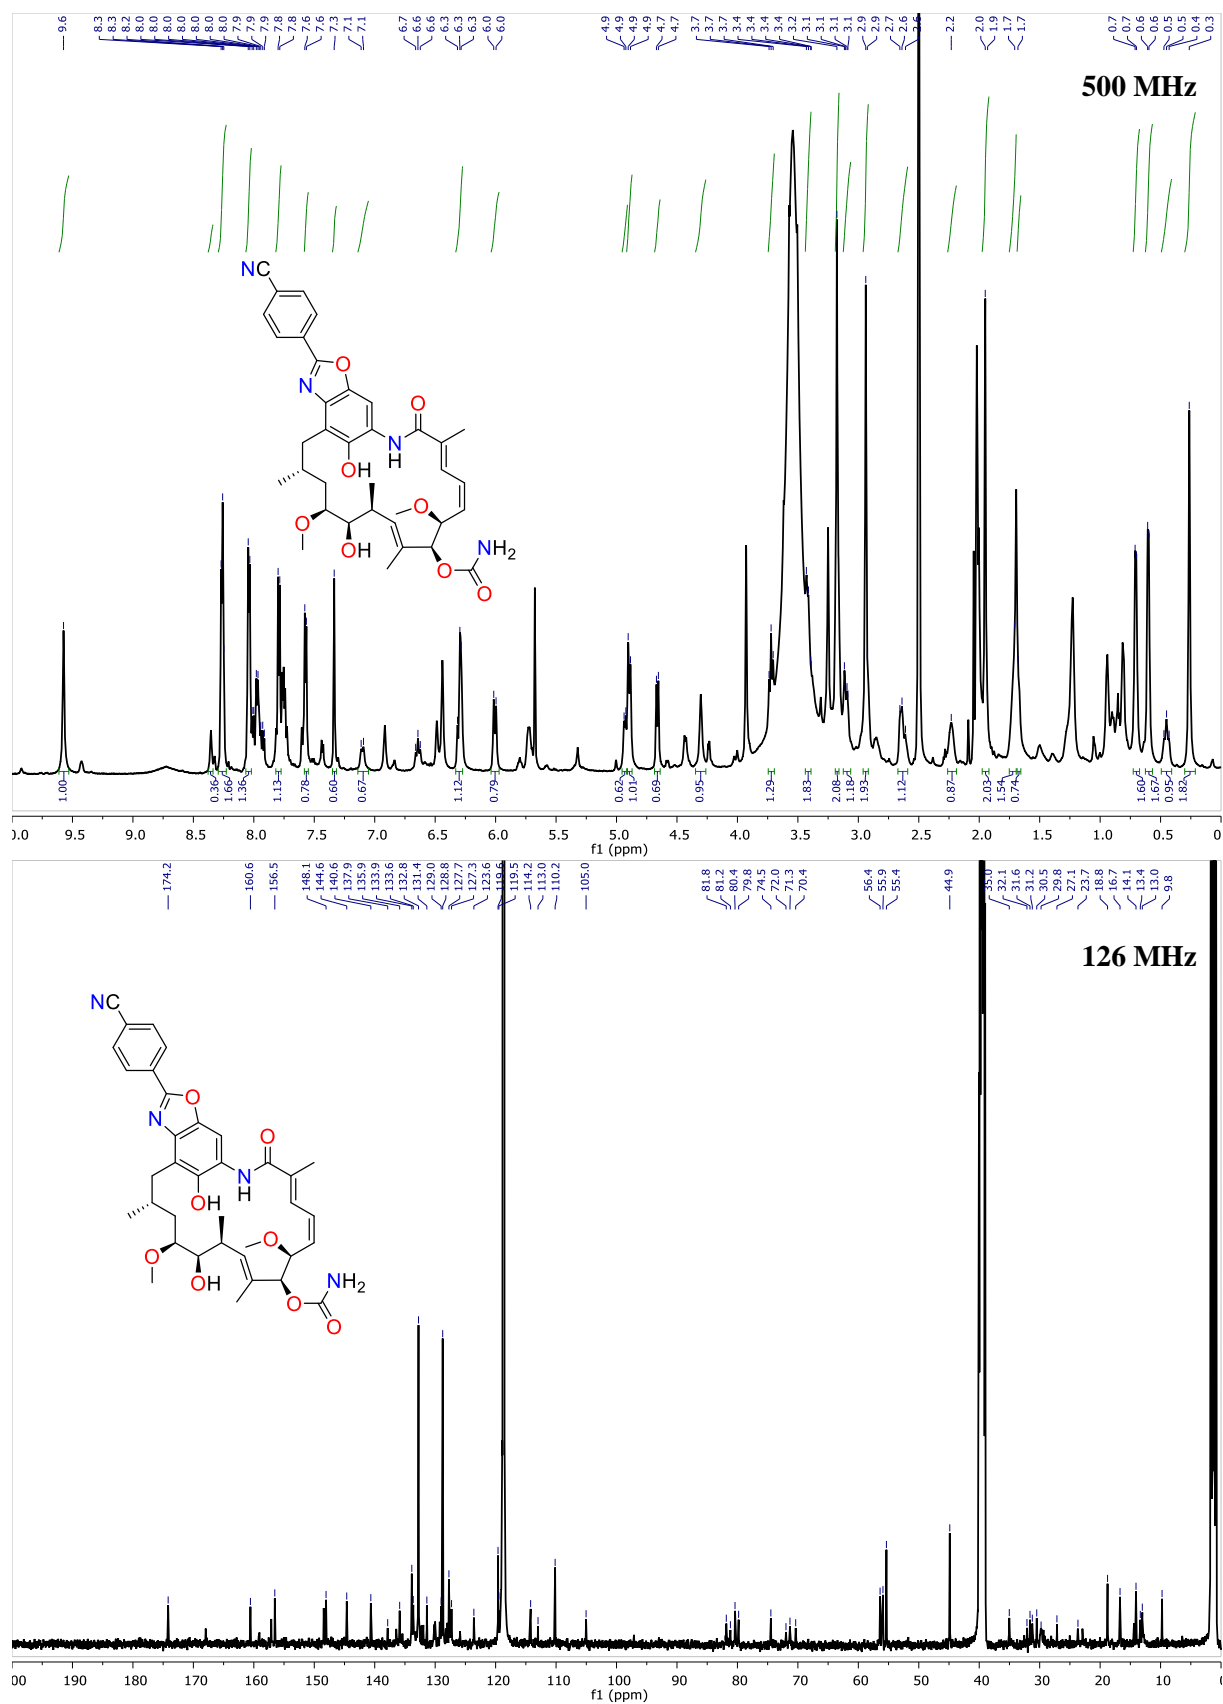

**Figure S61**  $^1\text{H}$  and  $^{13}\text{C}\{^1\text{H}\}$  spectra of compound **8a** in  $\text{DMSO-}d_6 + \text{ACN-}d_3$ .

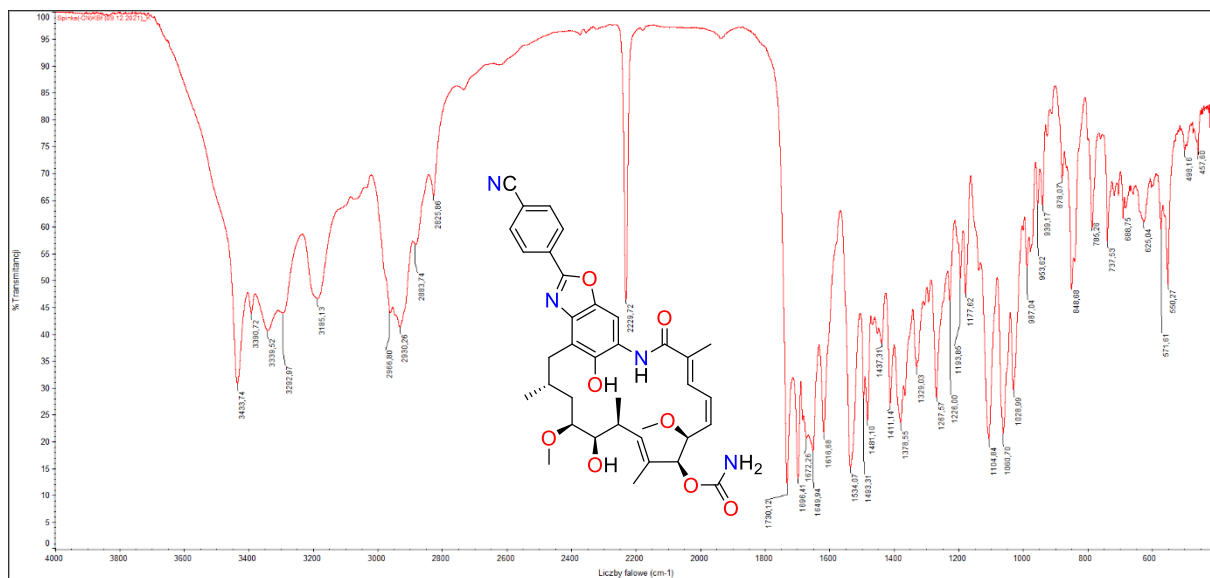

Figure S62 FT-IR spectrum of compound 8a (in KBr).

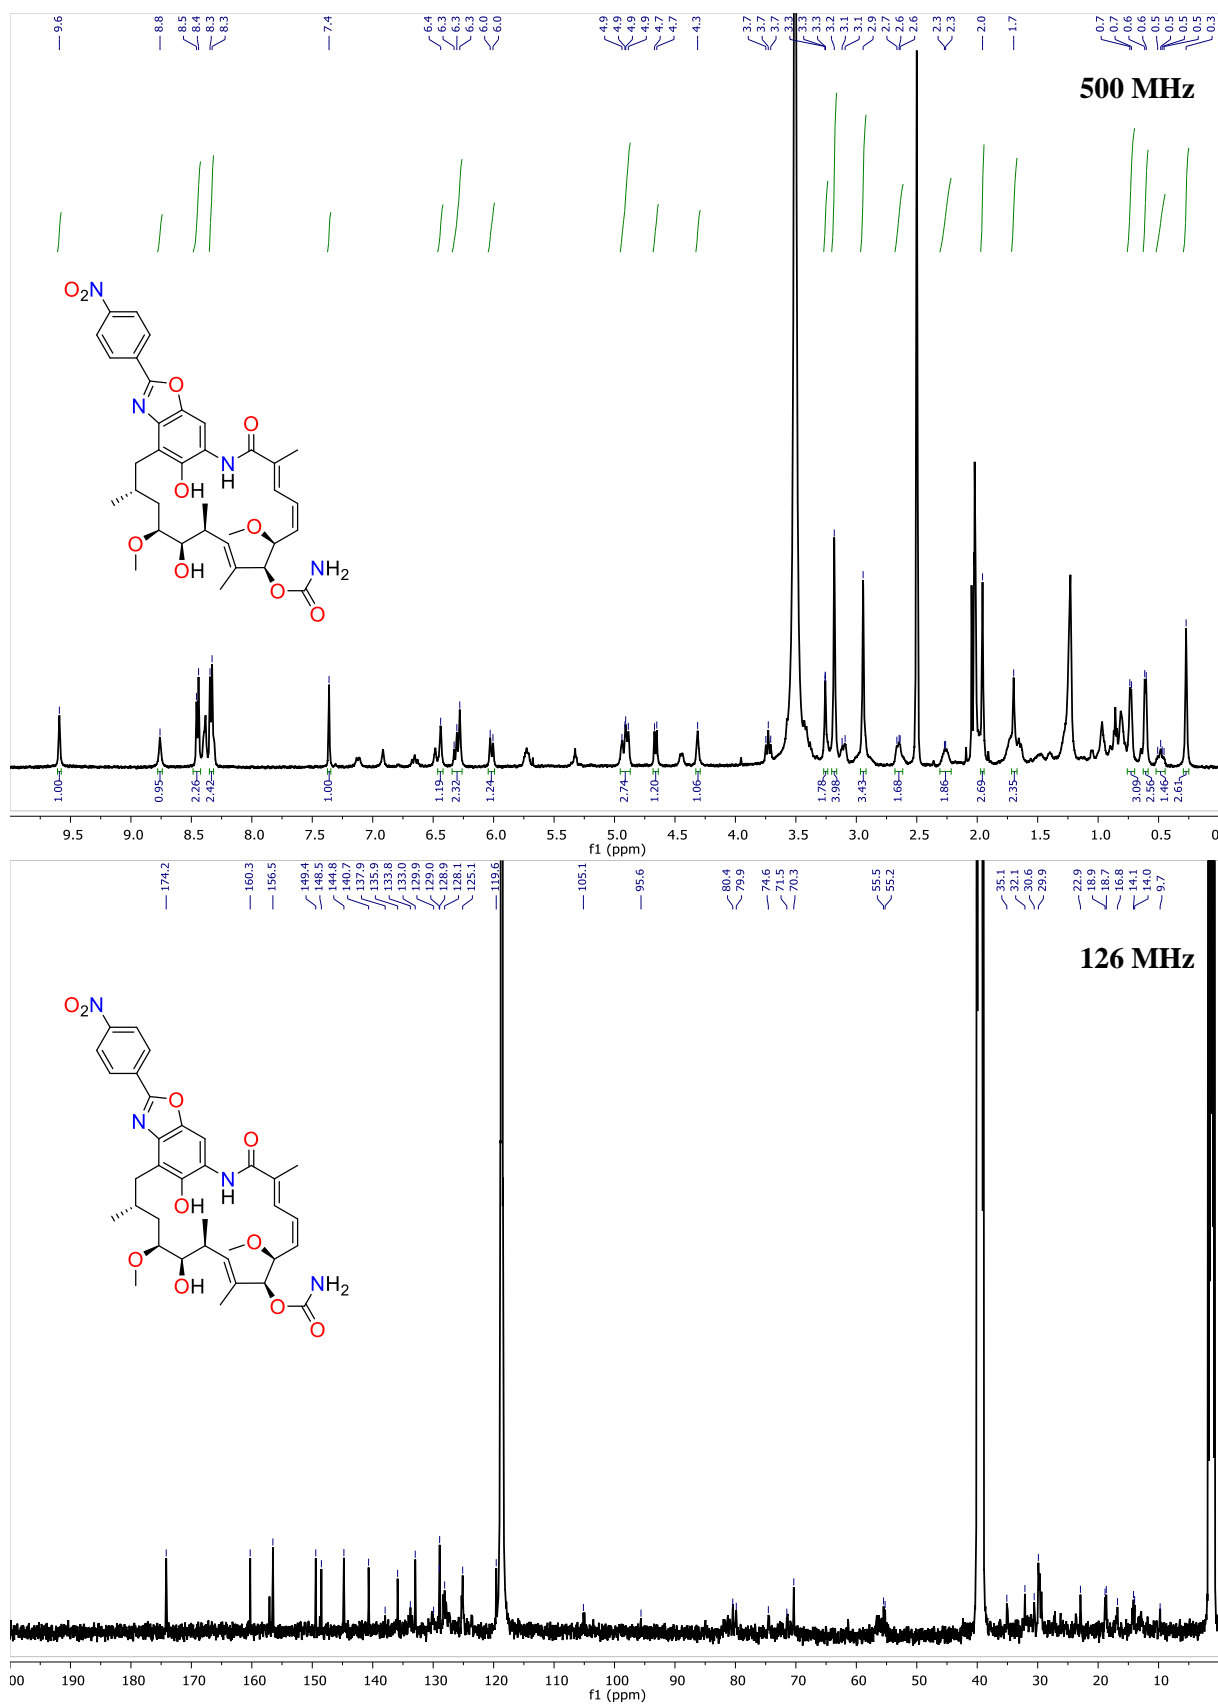

**Figure S63**  $^1\text{H}$  and  $^{13}\text{C}\{^1\text{H}\}$  spectra of compound **9a** in  $\text{DMSO-}d_6 + \text{ACN-}d_3$ .

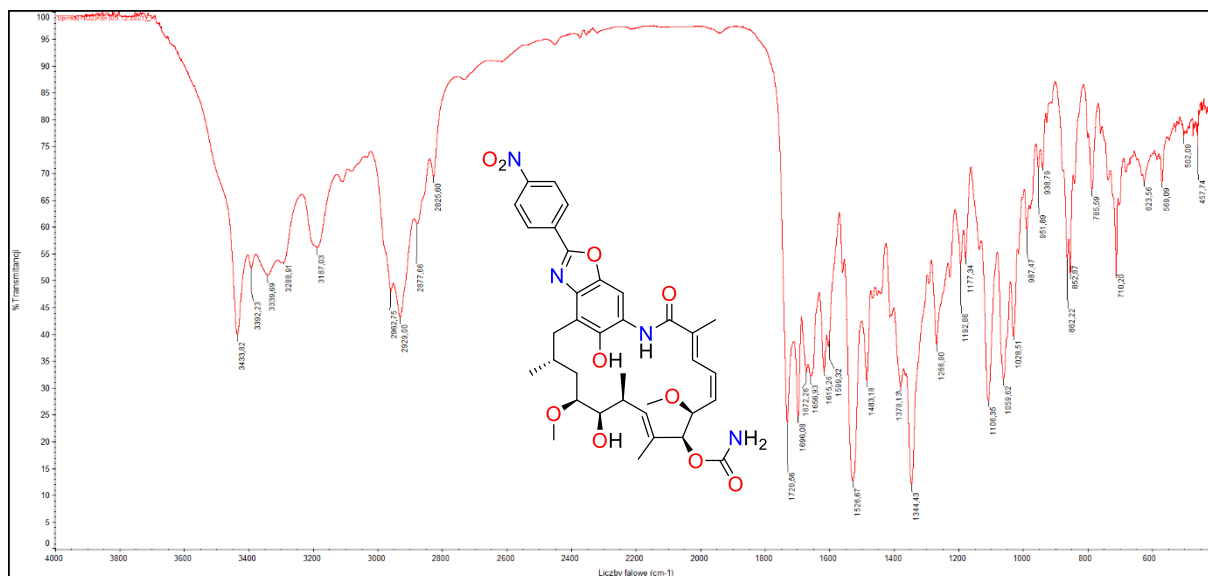

**Figure S64** FT-IR spectrum of compound **9a** (in KBr).



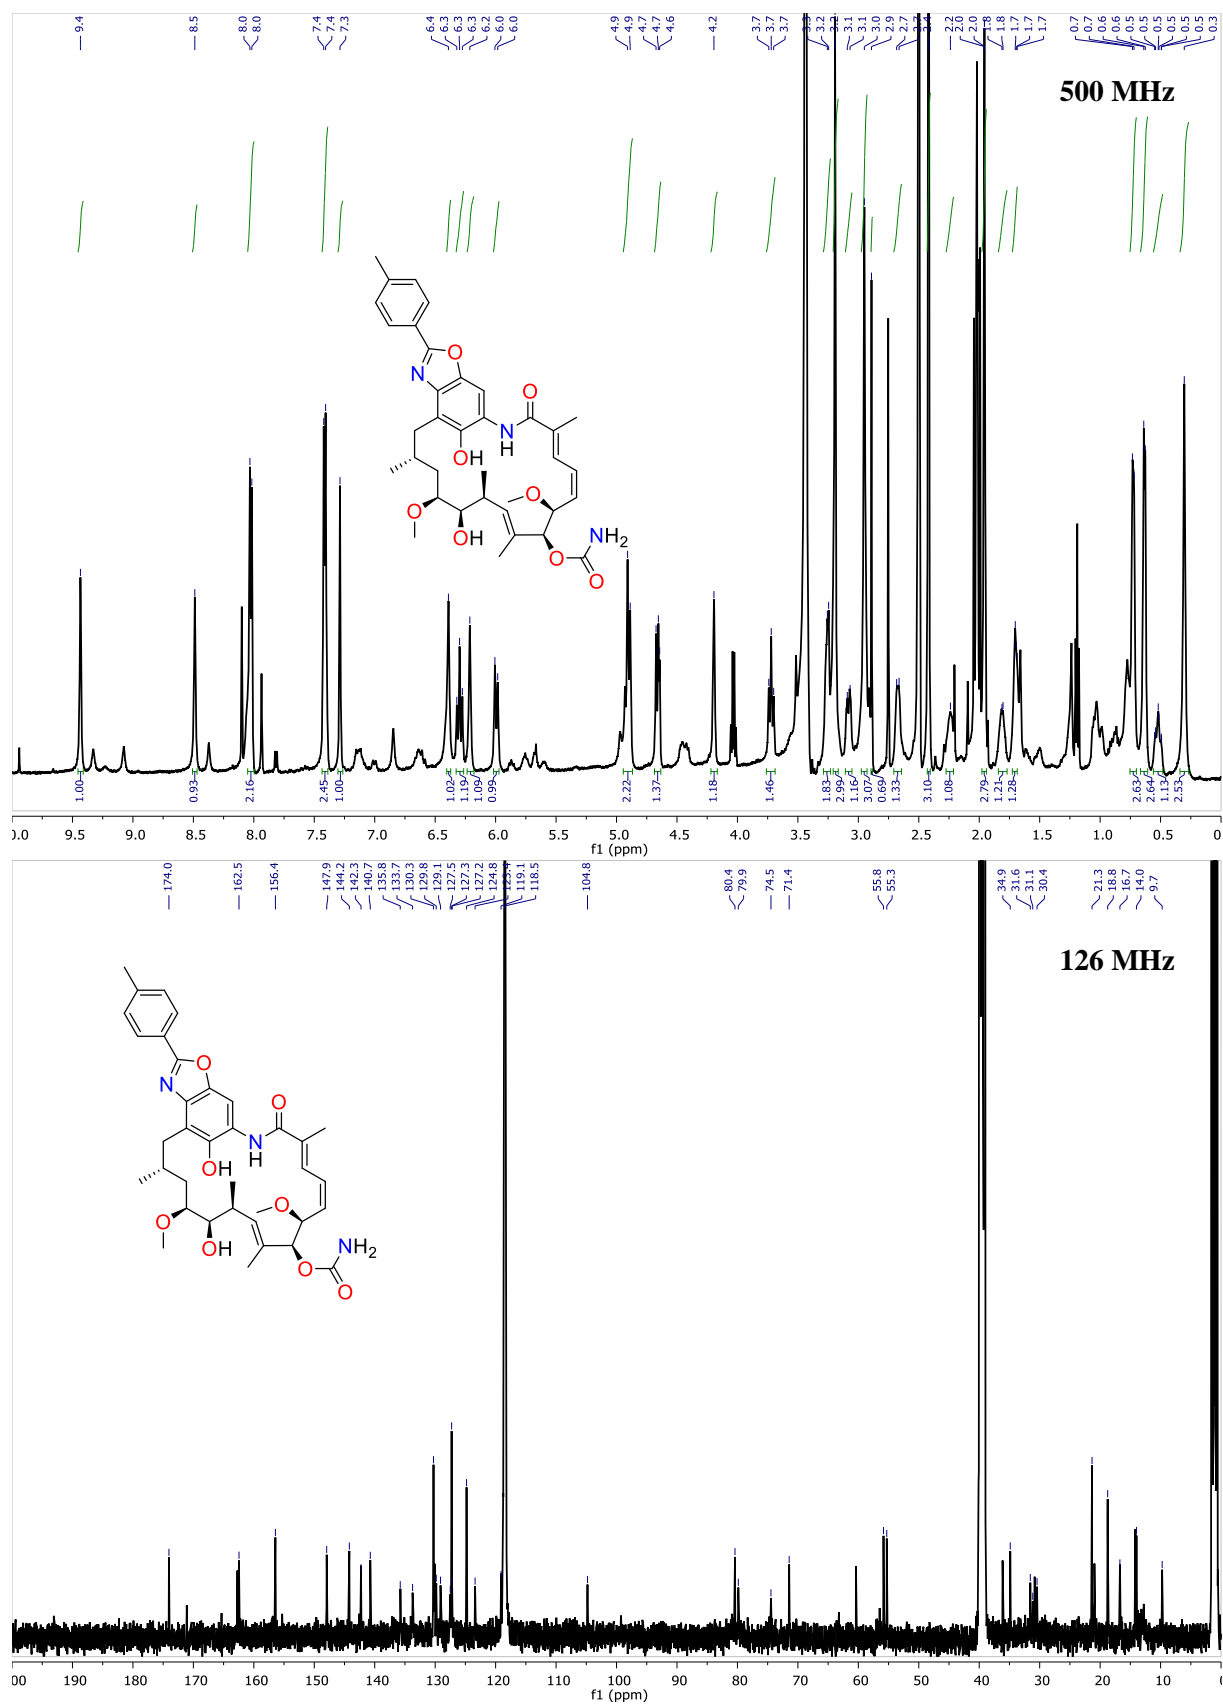

**Figure S65**  $^1\text{H}$  and  $^{13}\text{C}\{^1\text{H}\}$  spectra of compound **10a** in  $\text{DMSO-}d_6 + \text{ACN-}d_3$ .

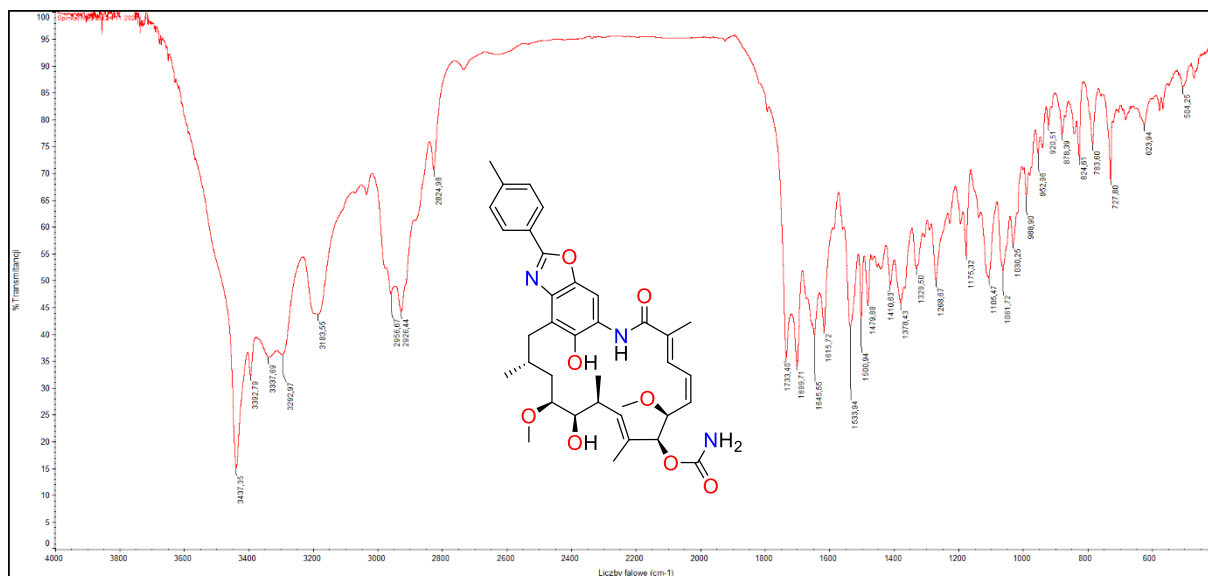

**Figure S66** FT-IR spectrum of compound **10a** (in KBr).

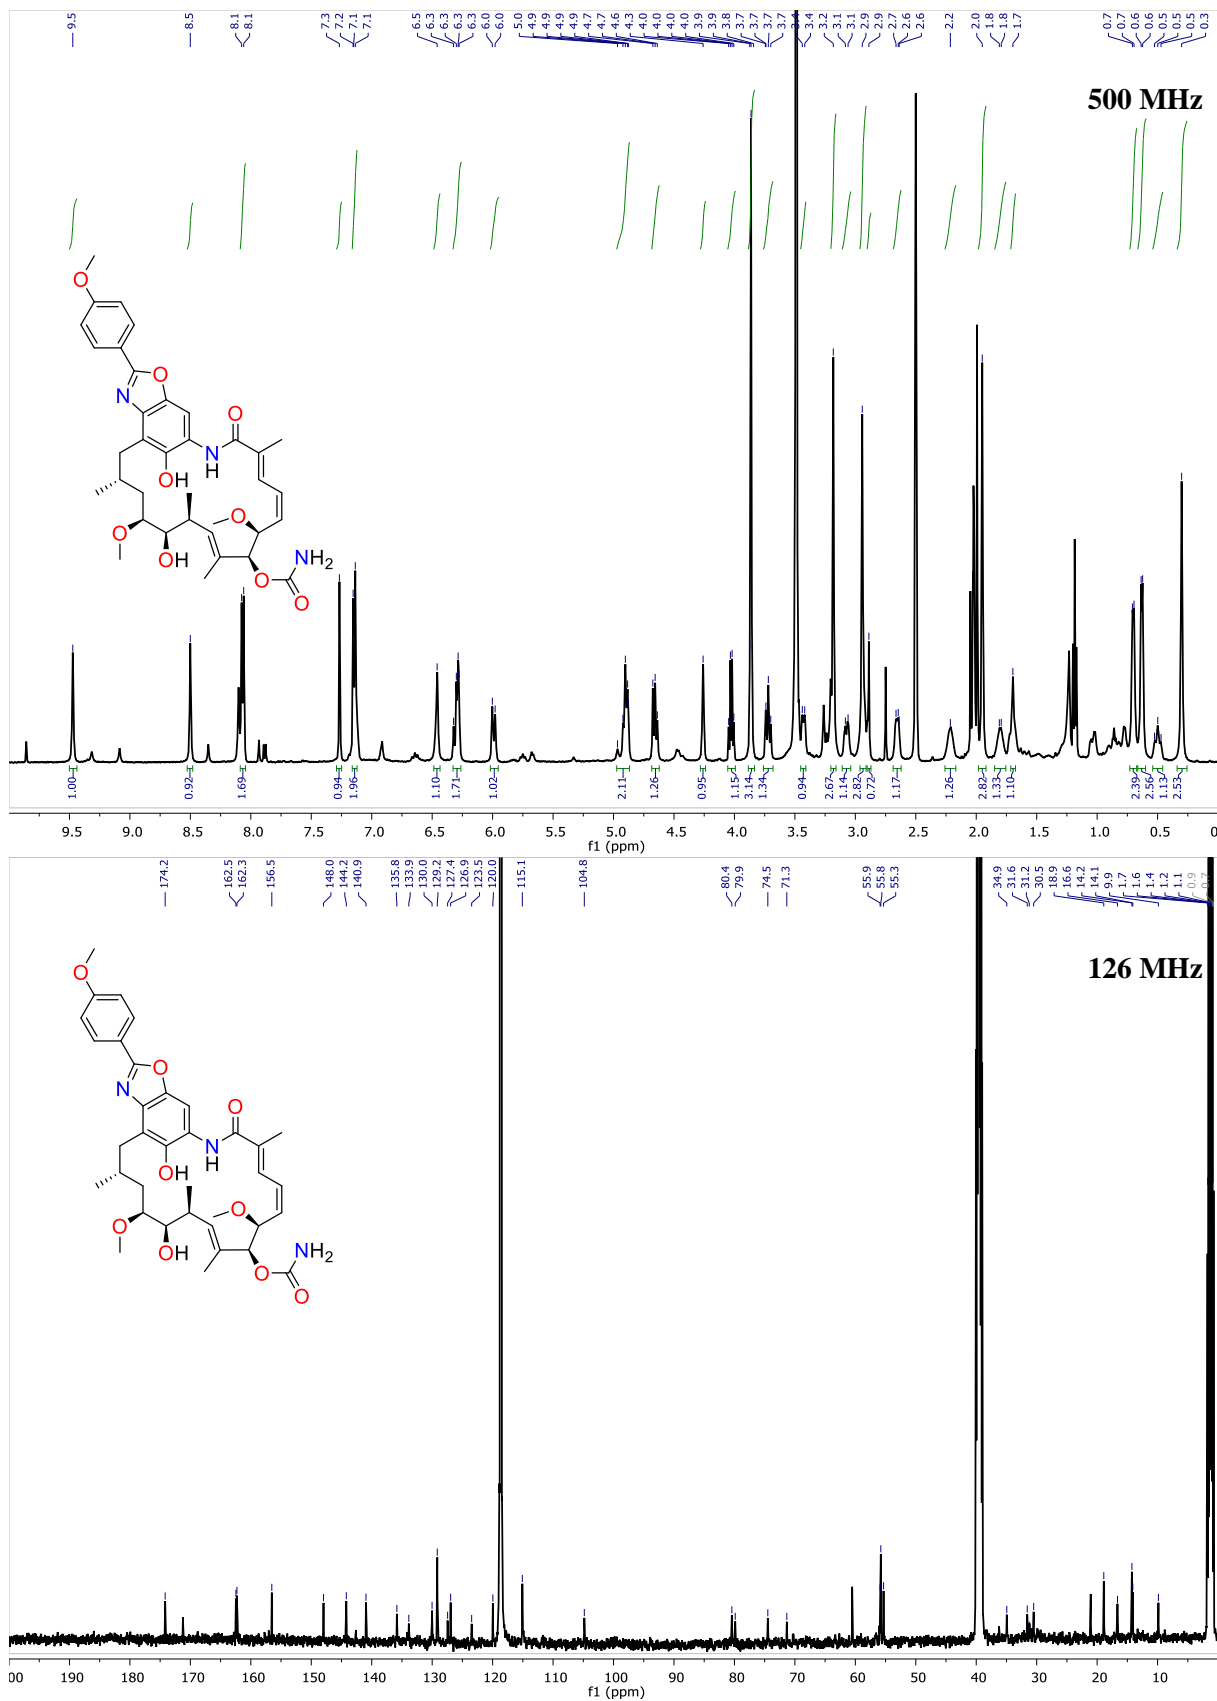

**Figure S67**  $^1\text{H}$  and  $^{13}\text{C}\{^1\text{H}\}$  spectra of compound 11a in  $\text{DMSO-}d_6 + \text{ACN-}d_3$ .

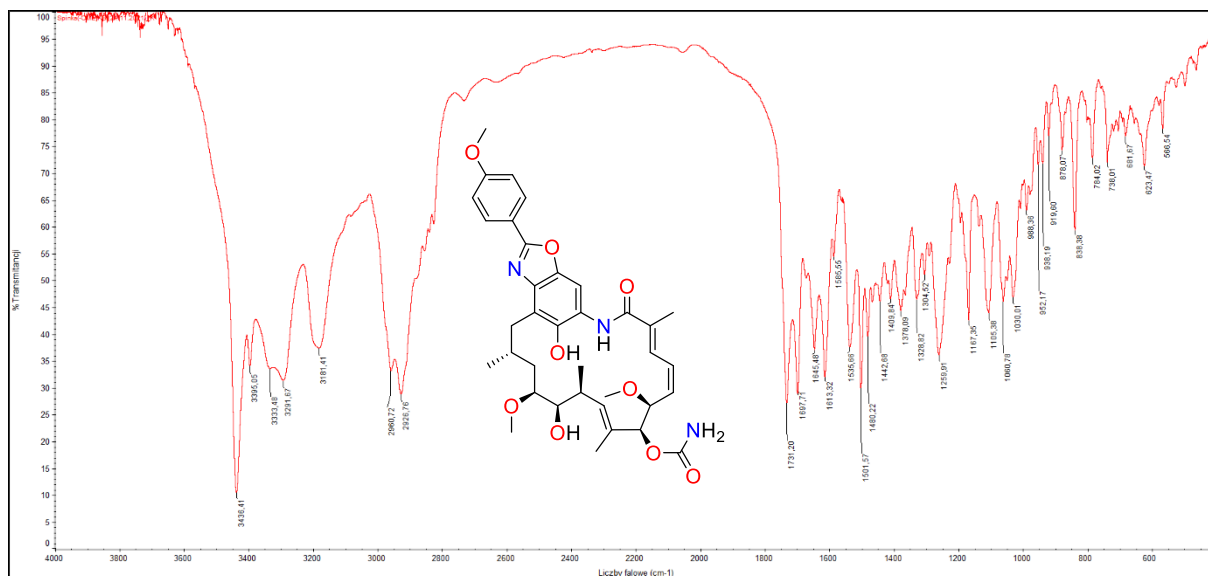

**Figure S68** FT-IR spectrum of compound **11a** (in KBr).

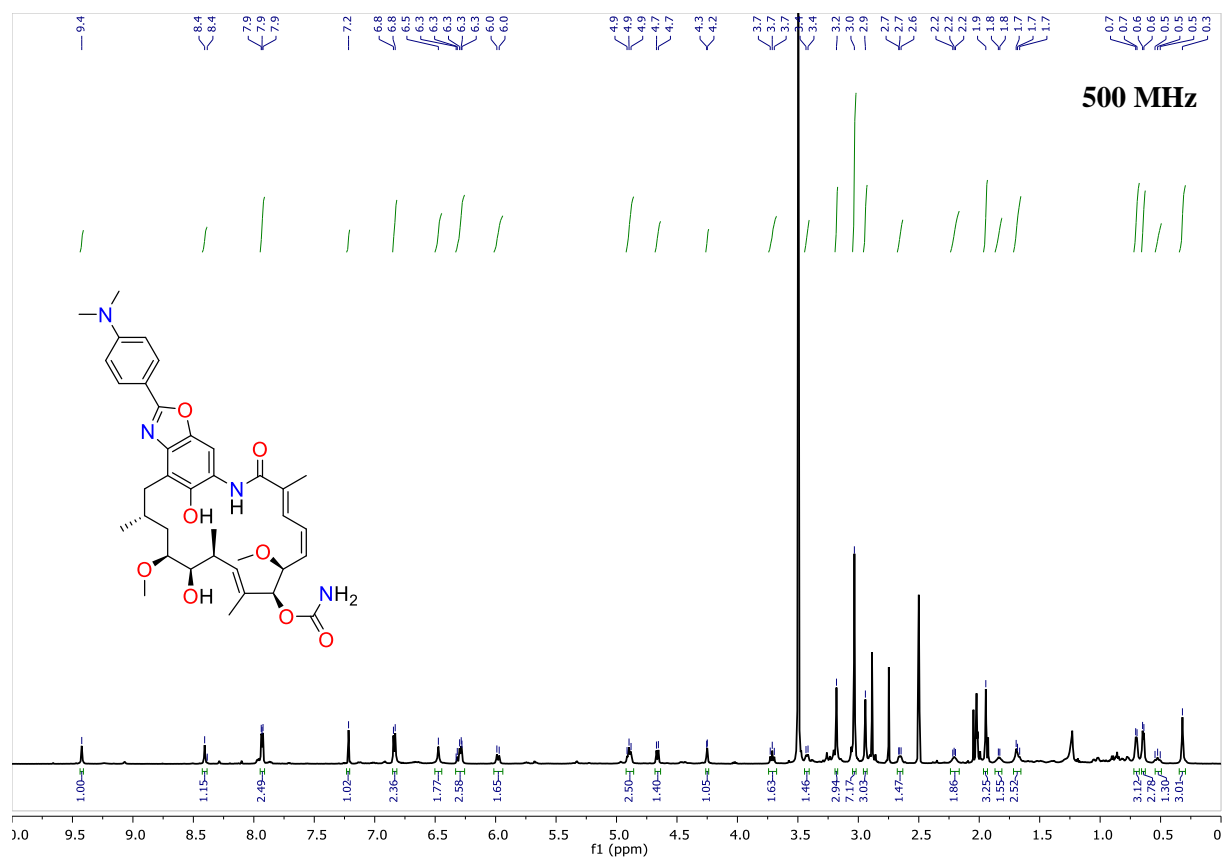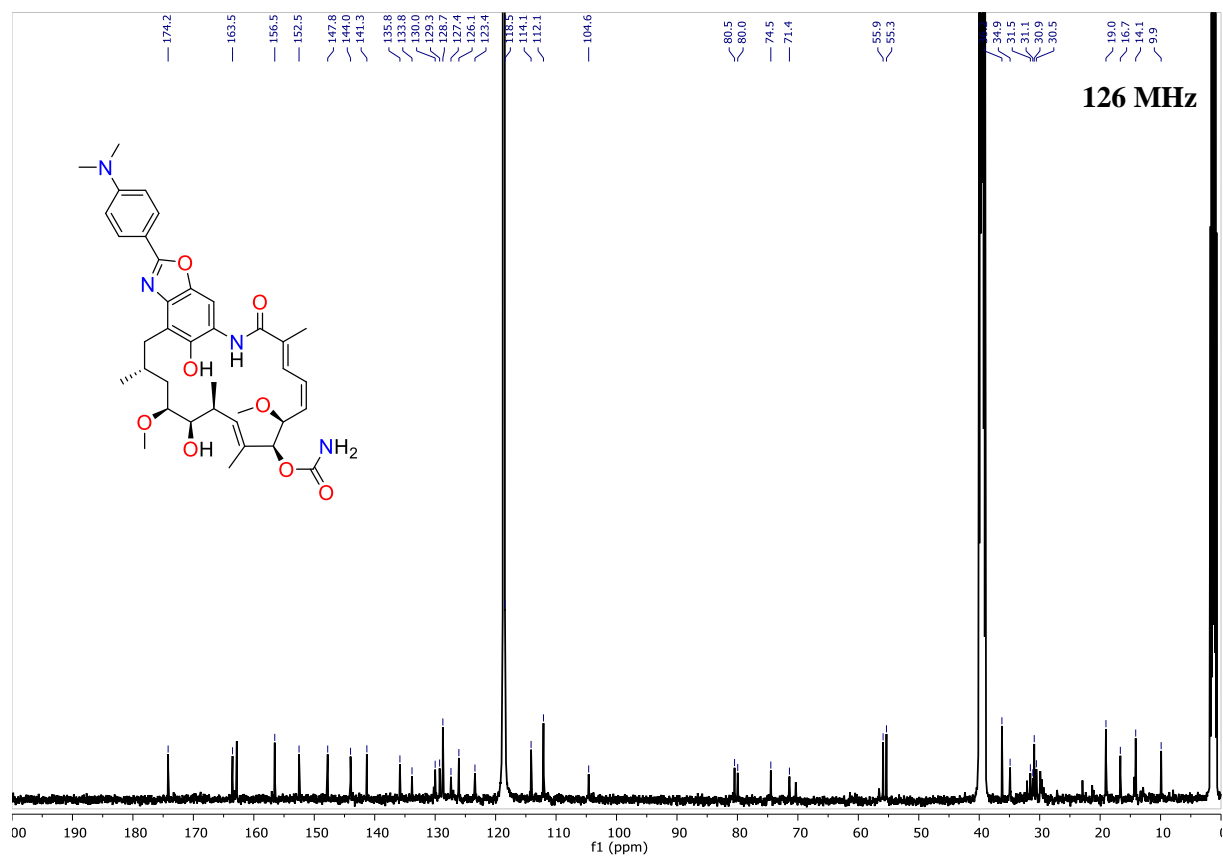

**Figure S69**  $^1\text{H}$  and  $^{13}\text{C}\{^1\text{H}\}$  spectra of compound **12a** in  $\text{DMSO-}d_6 + \text{ACN-}d_3$ .

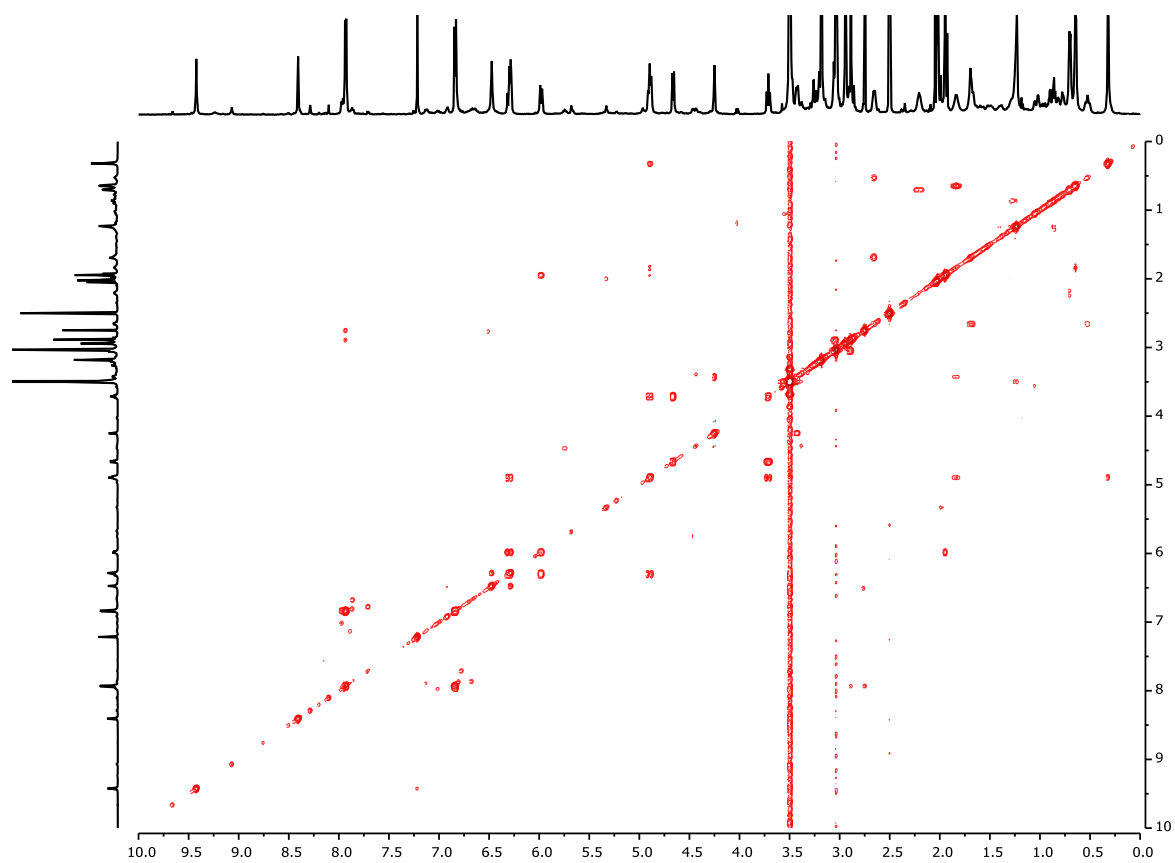

**Figure S70**  $^1\text{H}$ - $^1\text{H}$  COSY spectrum of compound **12a** in  $\text{DMSO-}d_6 + \text{ACN-}d_3$ .

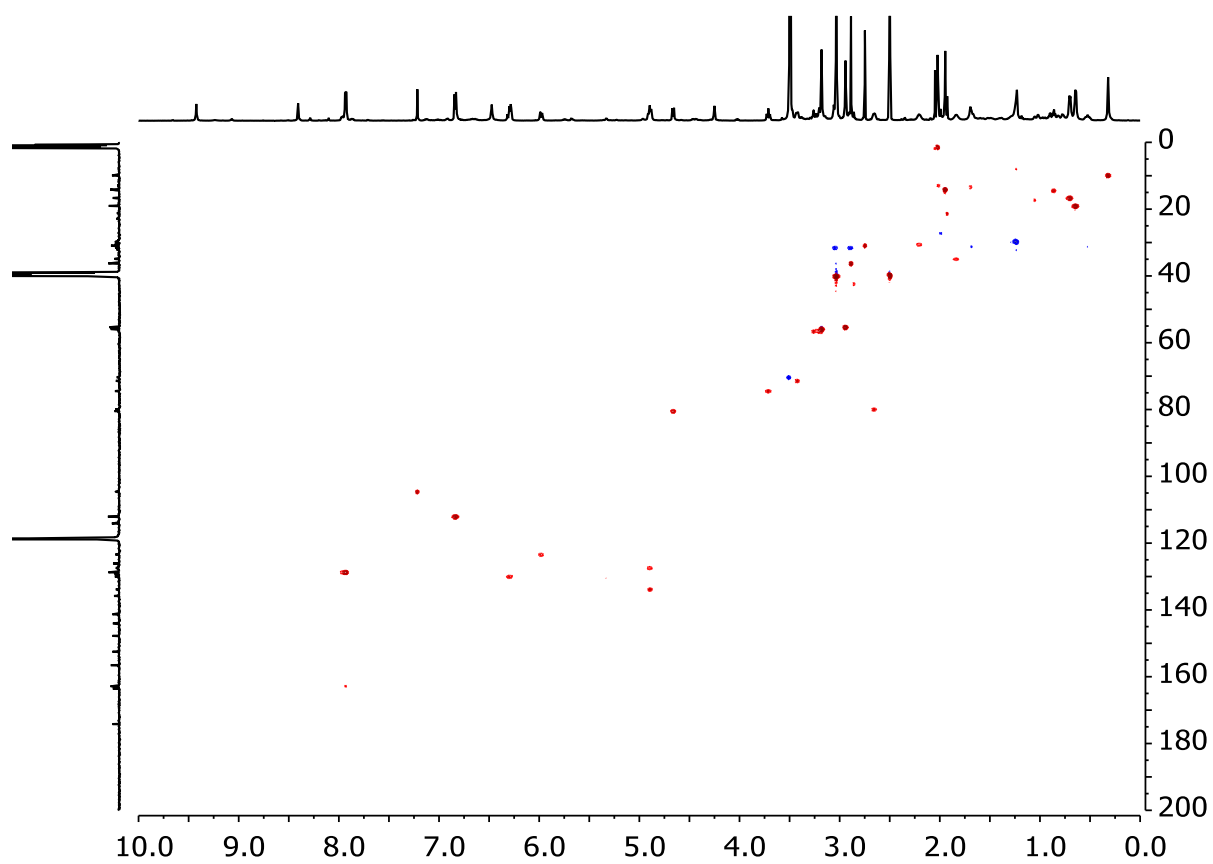

**Figure S71**  $^1\text{H}$ - $^{13}\text{C}$  HSQC spectrum of compound **12a** in  $\text{DMSO-}d_6 + \text{ACN-}d_3$ .

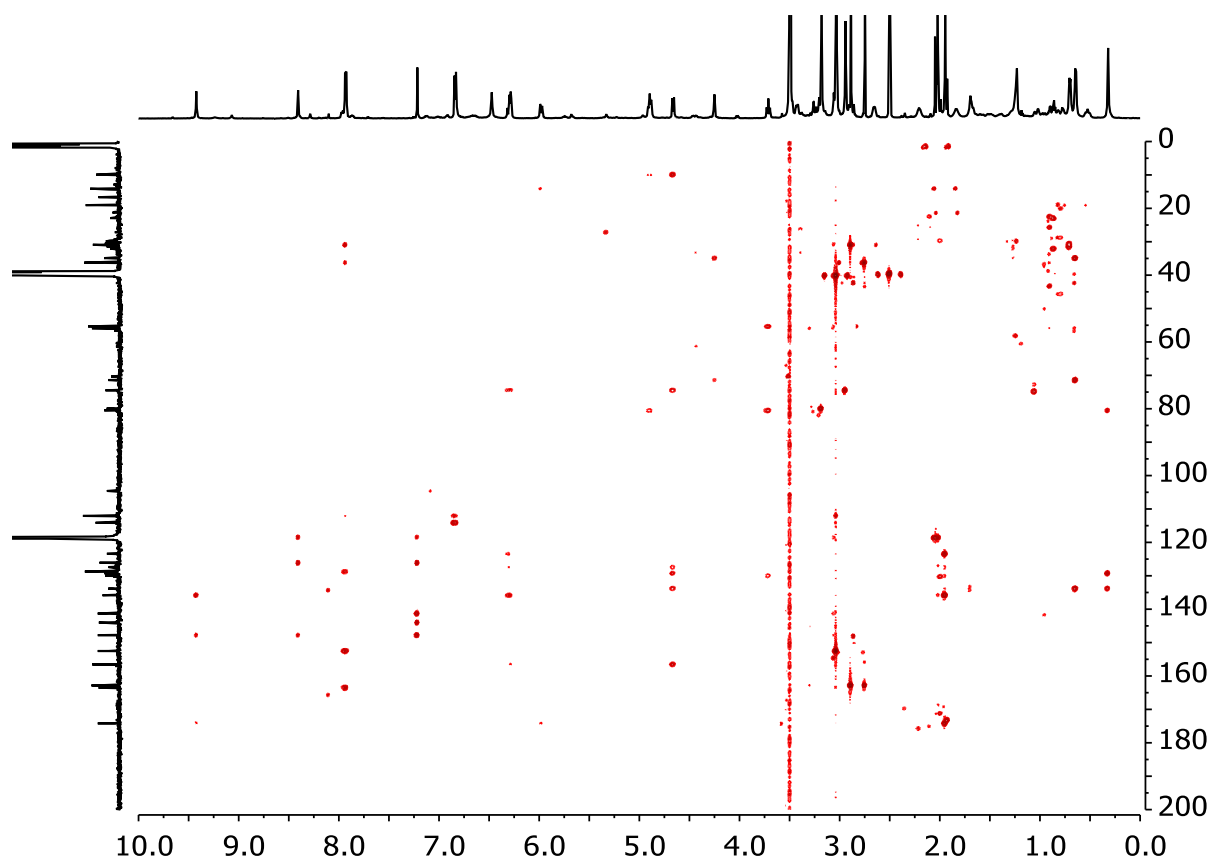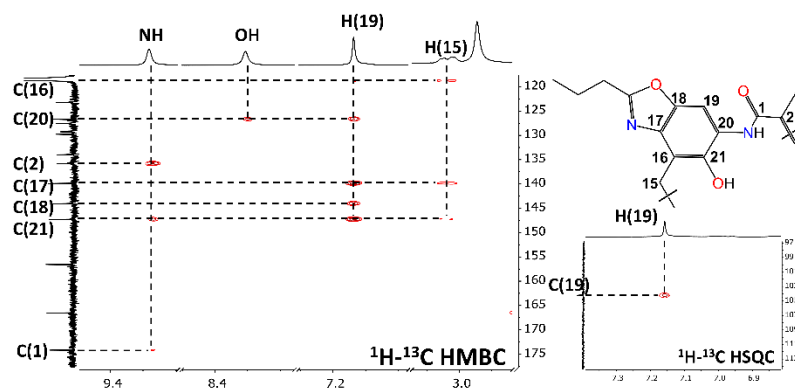

**Figure S72**  $^1\text{H}$ - $^{13}\text{C}$  HMBC spectra of compound **12a** in  $\text{DMSO-}d_6$ +  $\text{ACN-}d_3$ .

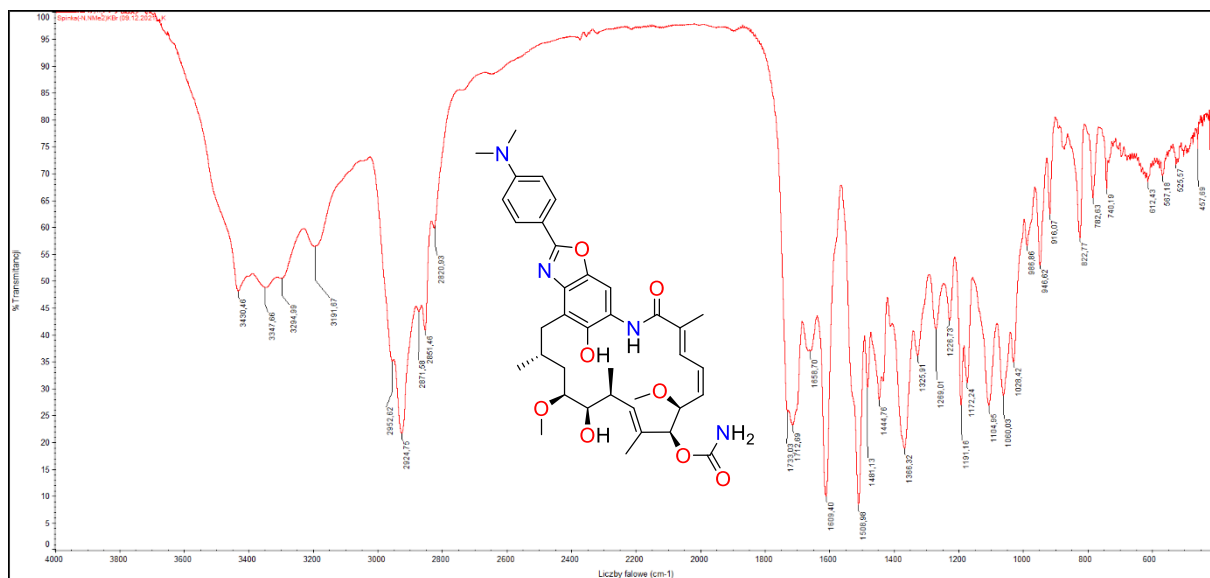

Figure S73 FT-IR spectrum of compound 12a (in KBr).



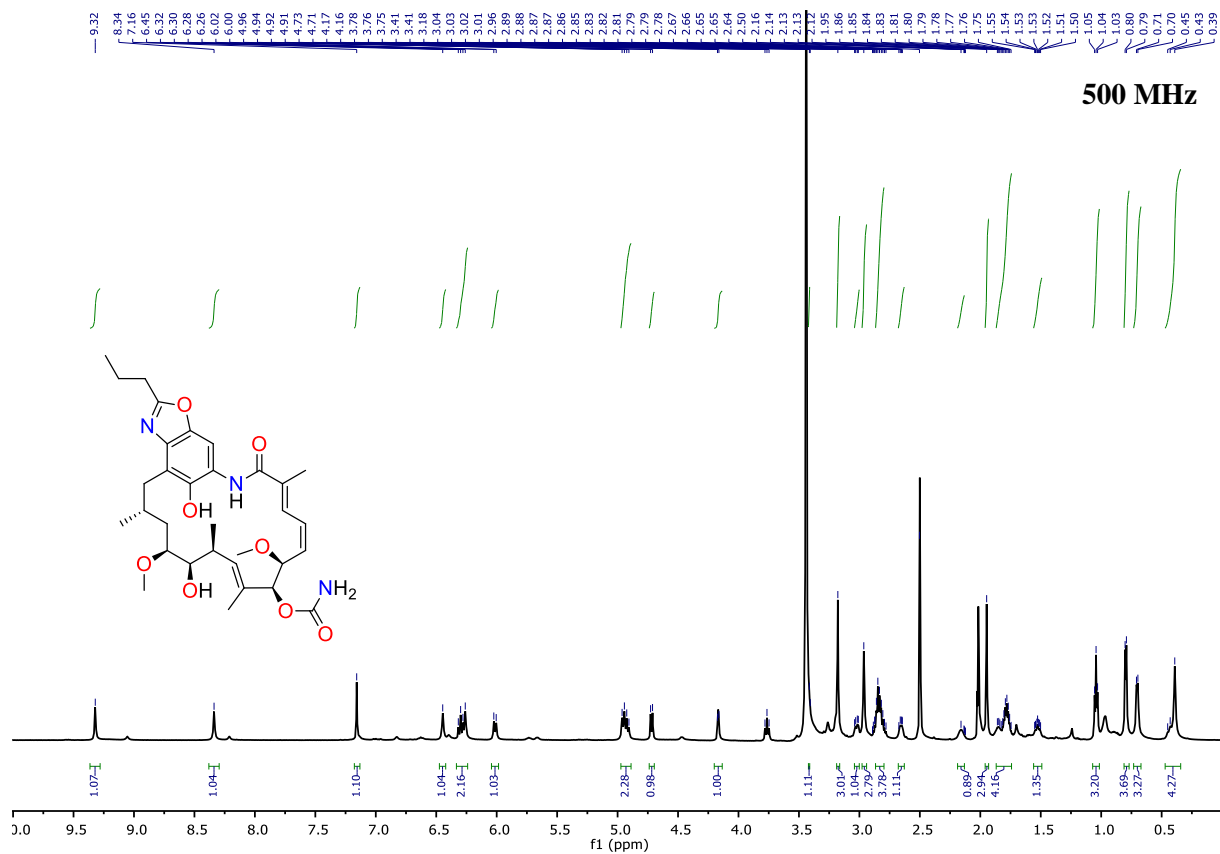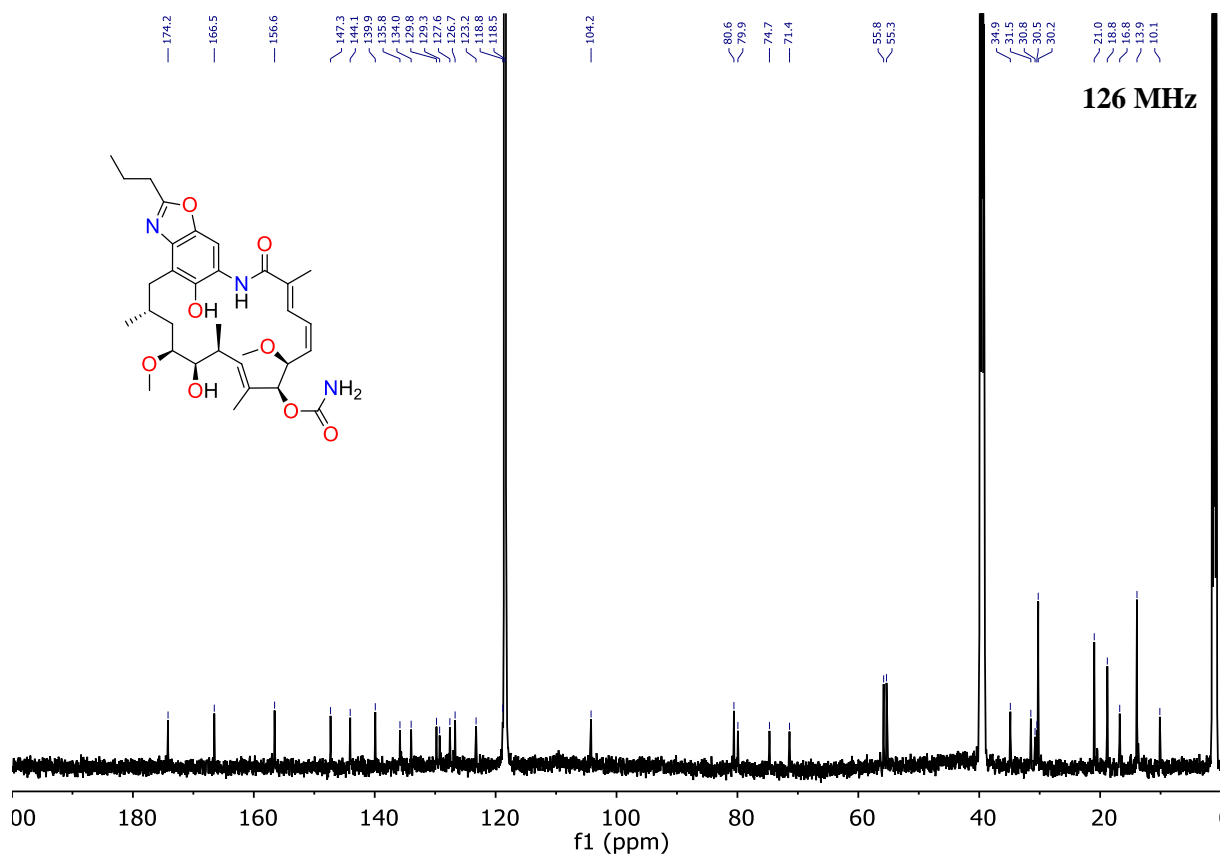

**Figure S74** <sup>1</sup>H and <sup>13</sup>C{<sup>1</sup>H} spectra of compound **13a** in DMSO-*d*<sub>6</sub>+ ACN-*d*<sub>3</sub>.

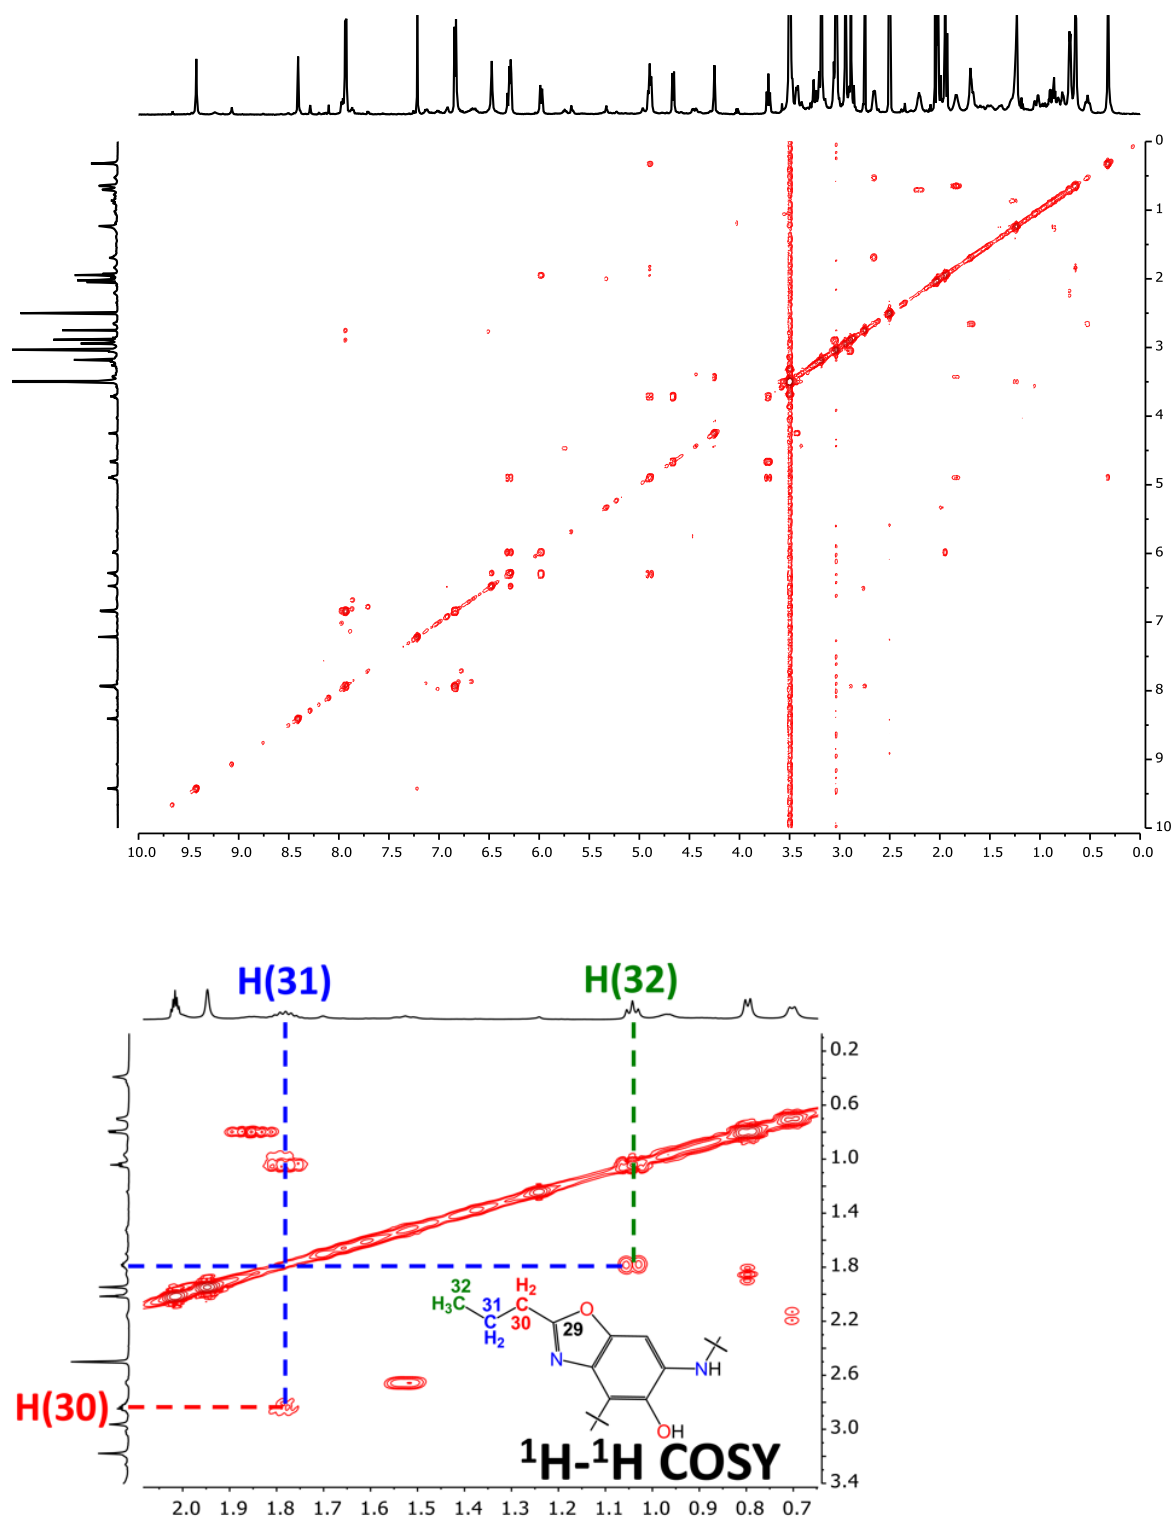

**Figure S75**  $^1\text{H}$ - $^1\text{H}$  COSY spectra of compound **13a** in DMSO- $d_6$ + ACN- $d_3$ .

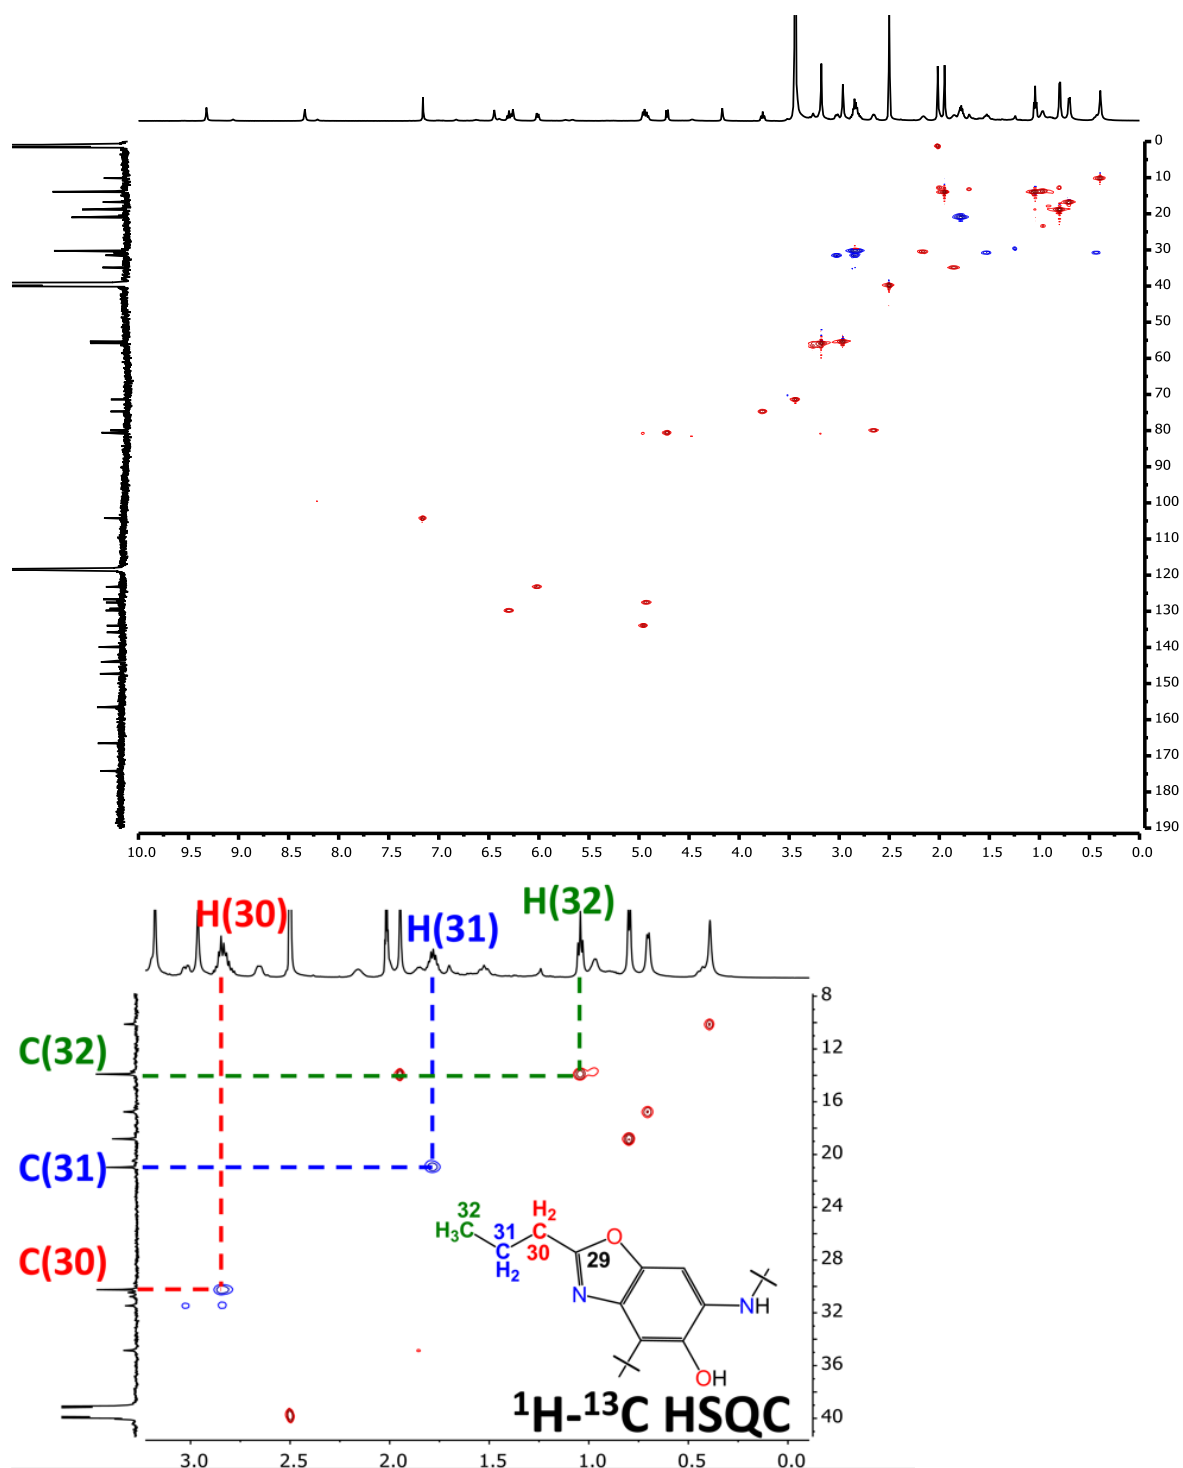

**Figure S76**  $^1\text{H}$ - $^{13}\text{C}$  HSQC spectra of compound **13a** in  $\text{DMSO-}d_6 + \text{ACN-}d_3$ .

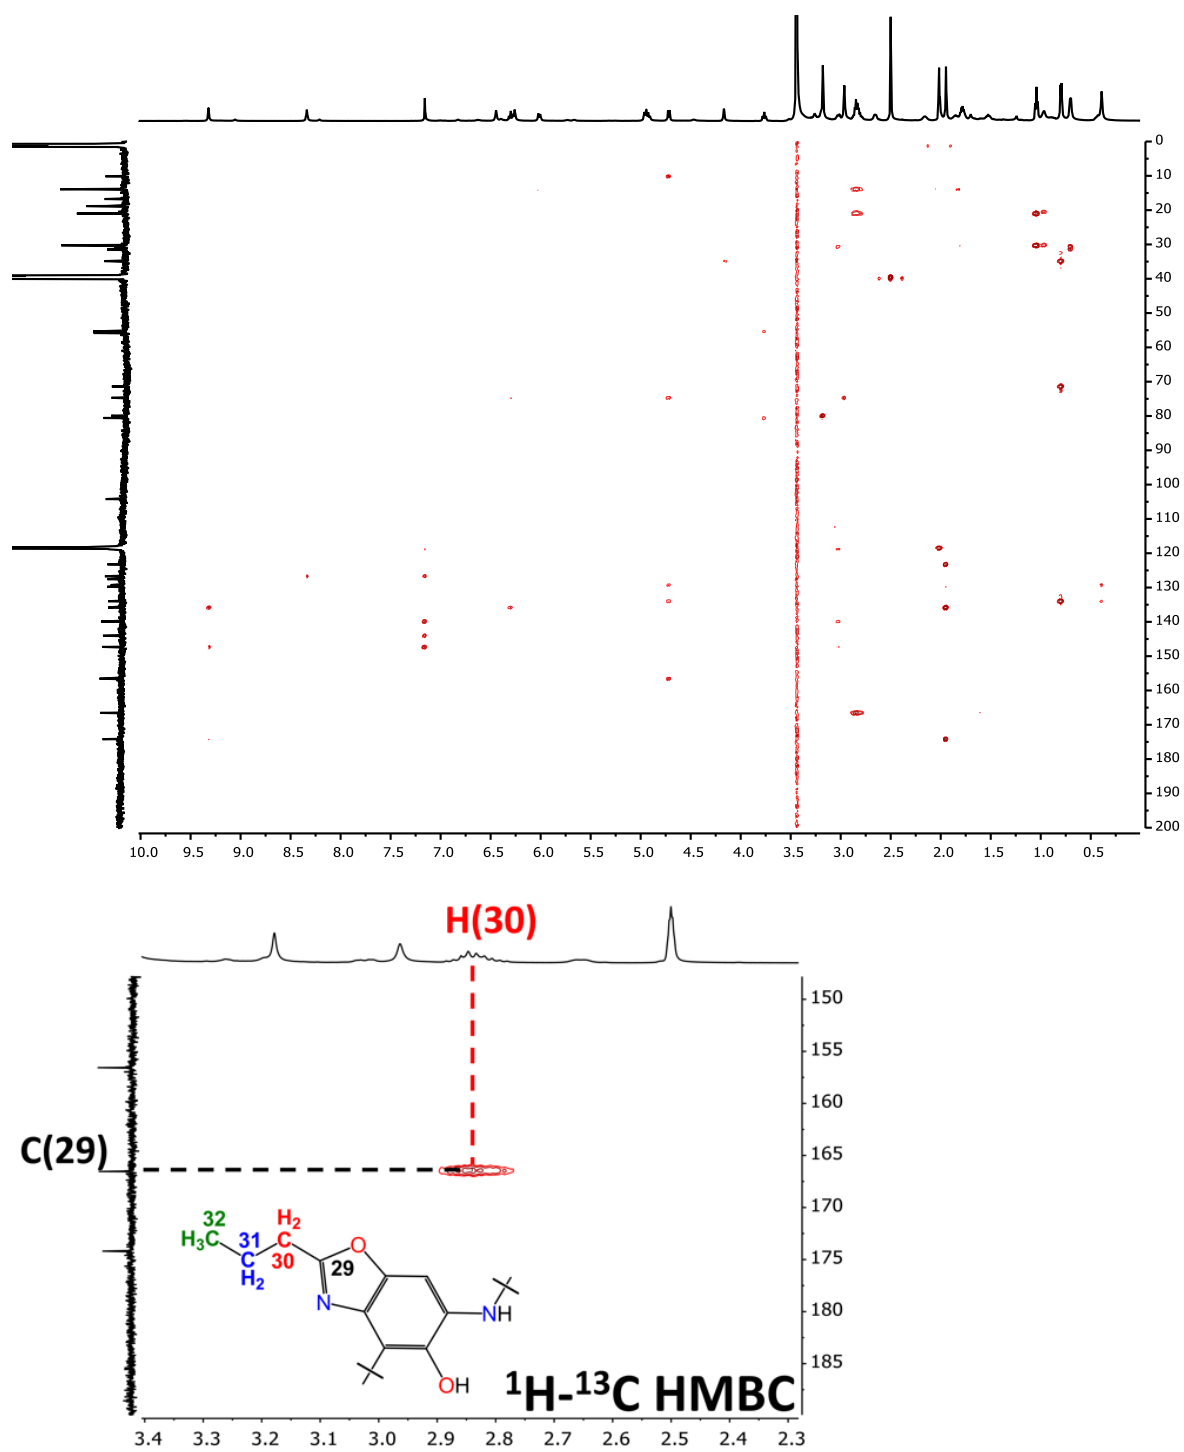

Figure S77  $^1\text{H}$ - $^{13}\text{C}$  HMBC spectra of compound **13a** in  $\text{DMSO-}d_6 + \text{ACN-}d_3$ .

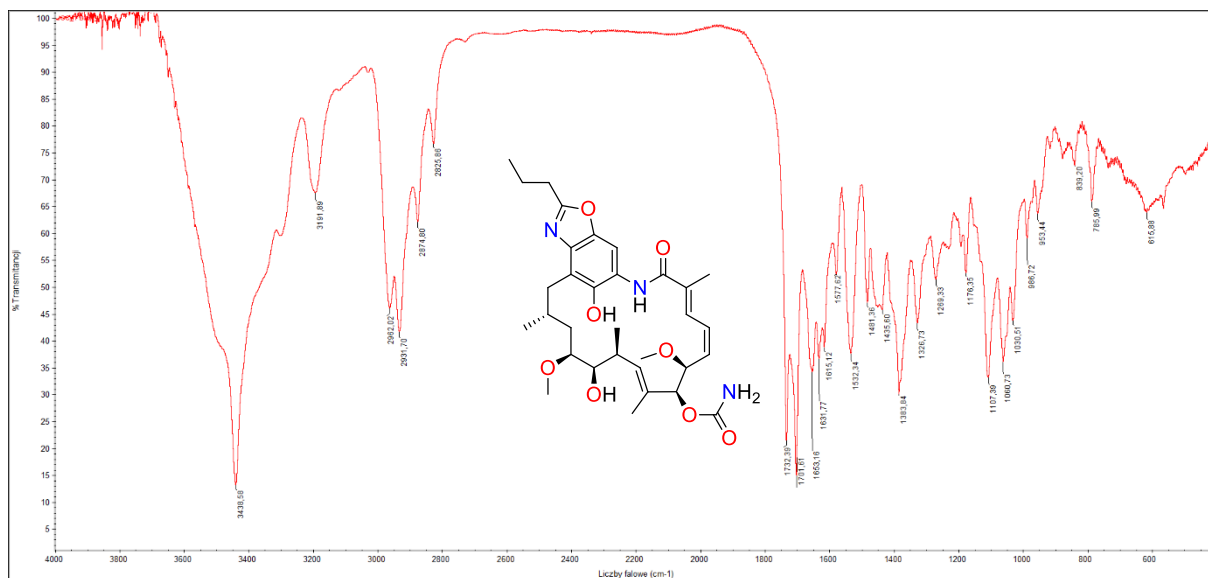

**Figure S78** FT-IR spectrum of compound **13a** (in KBr).

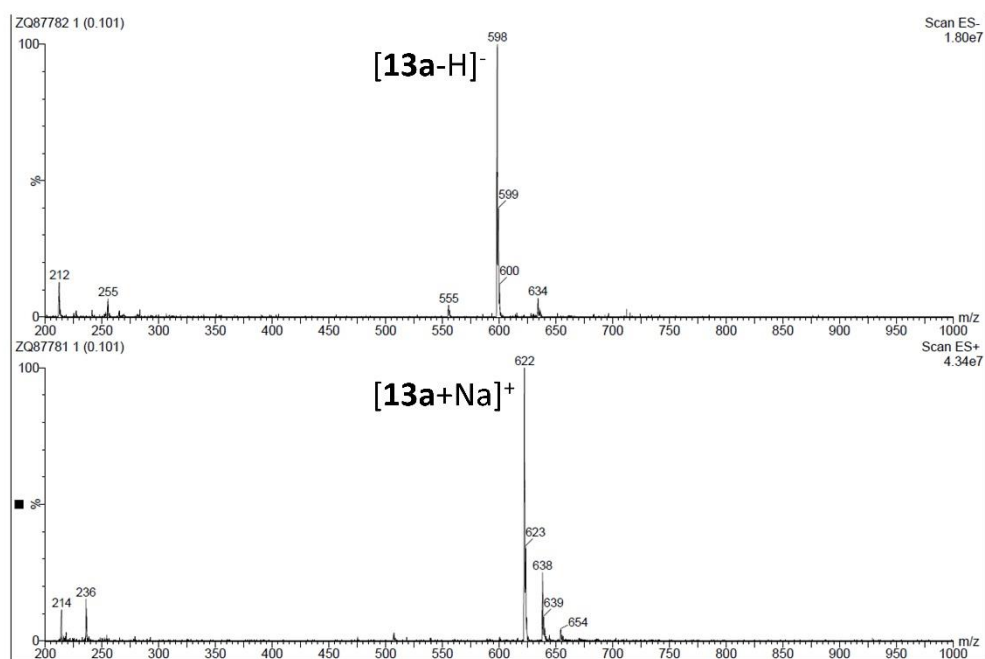

**Figure S79** ESI-MS spectrum of compound **13a**.

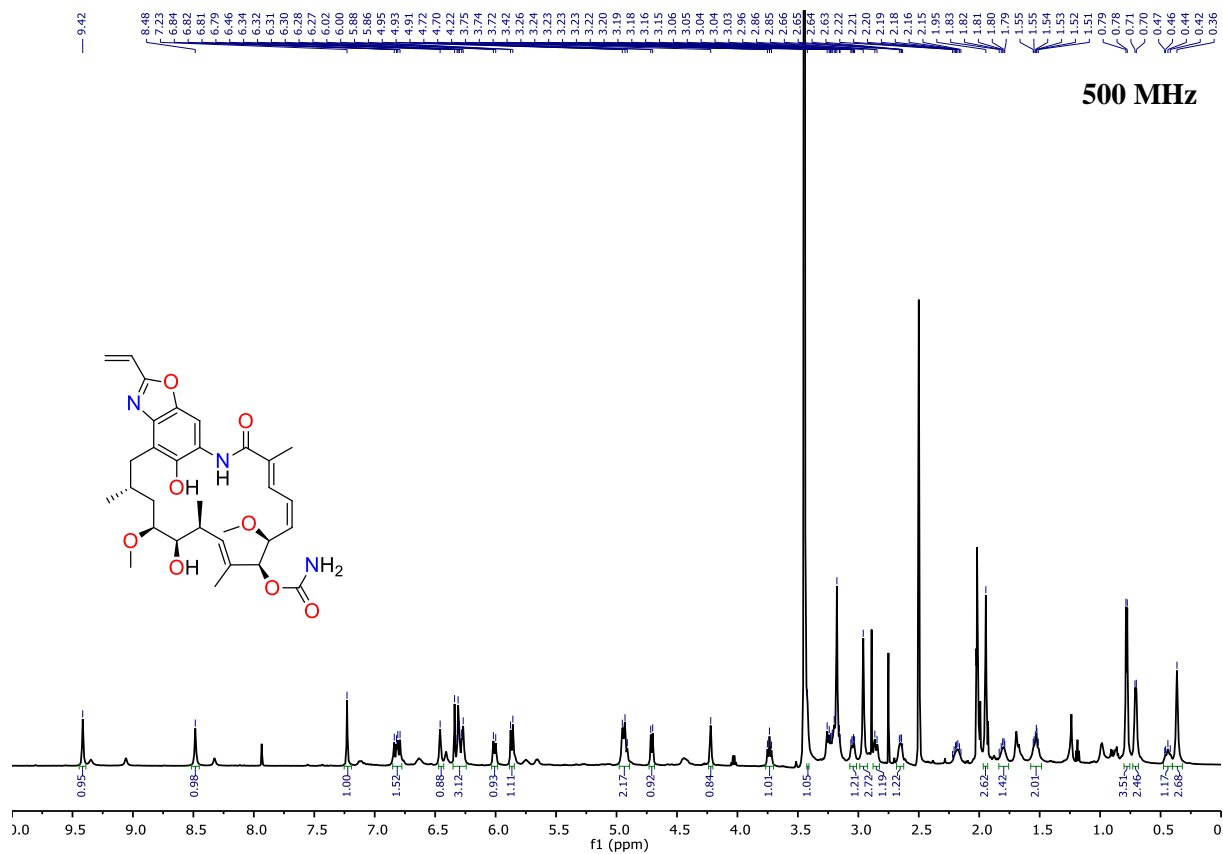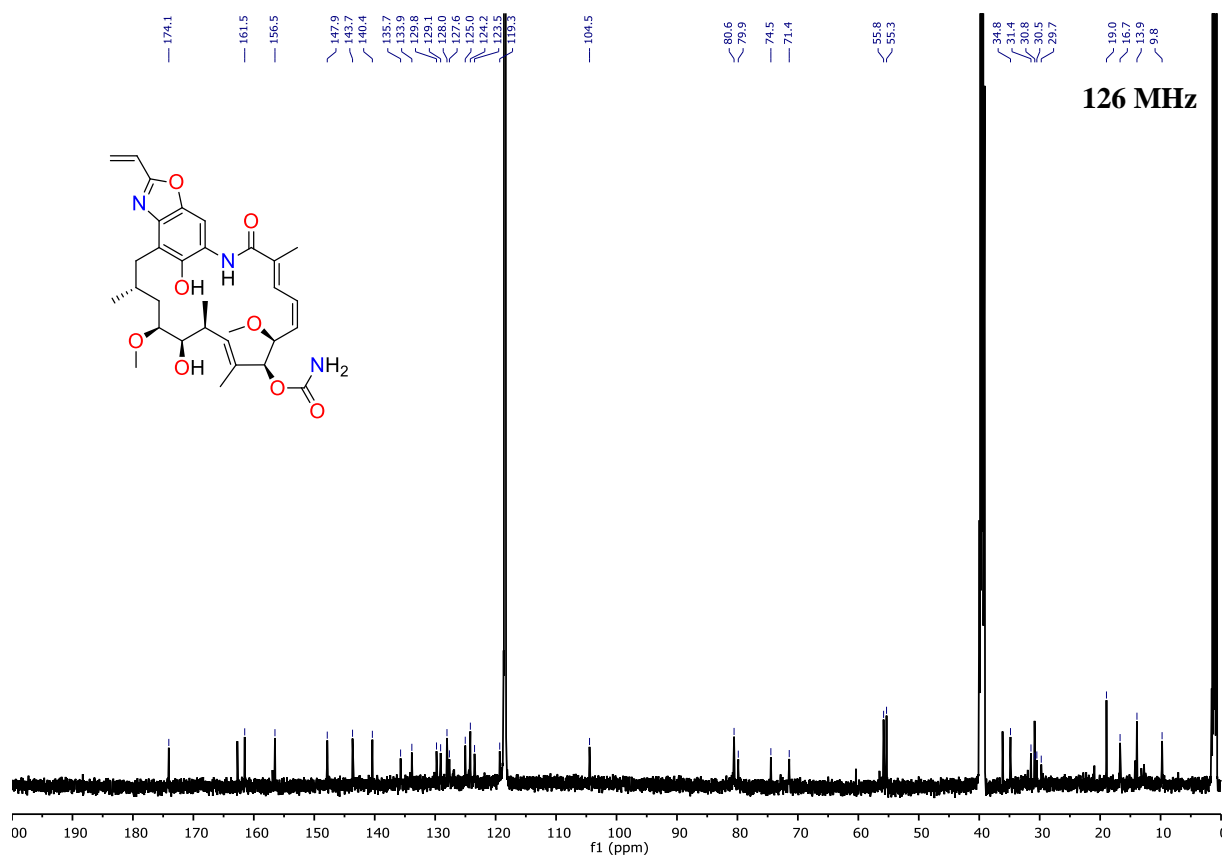

Figure S80  $^1\text{H}$  and  $^{13}\text{C}\{^1\text{H}\}$  spectra of compound **14a** in DMSO- $d_6$  + ACN- $d_3$ .

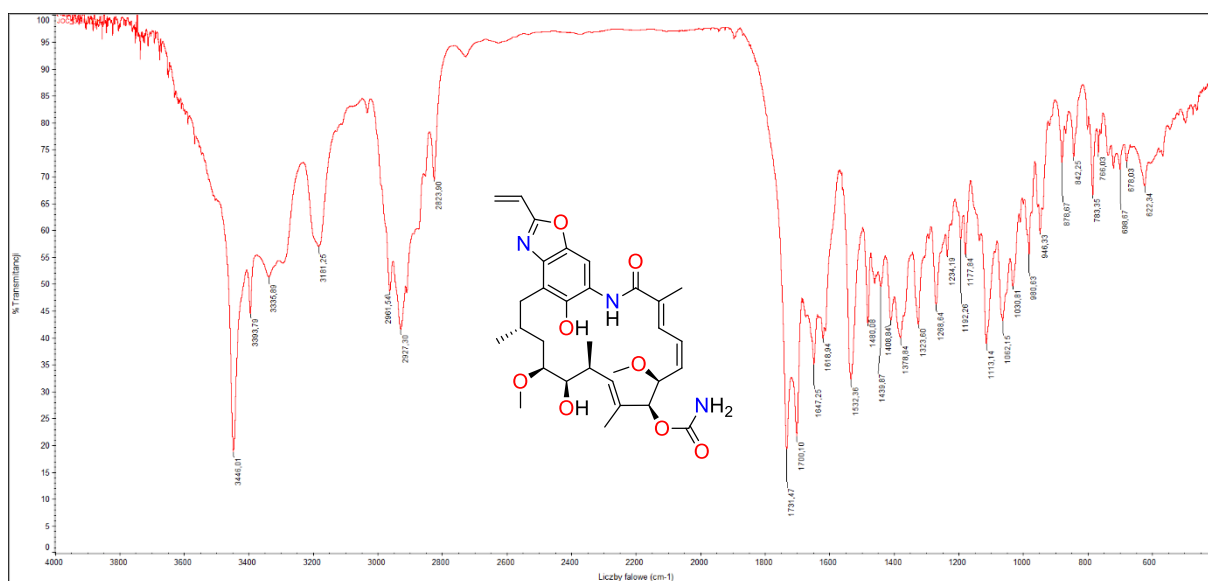

**Figure S81** FT-IR spectrum of compound **14a** (in KBr).

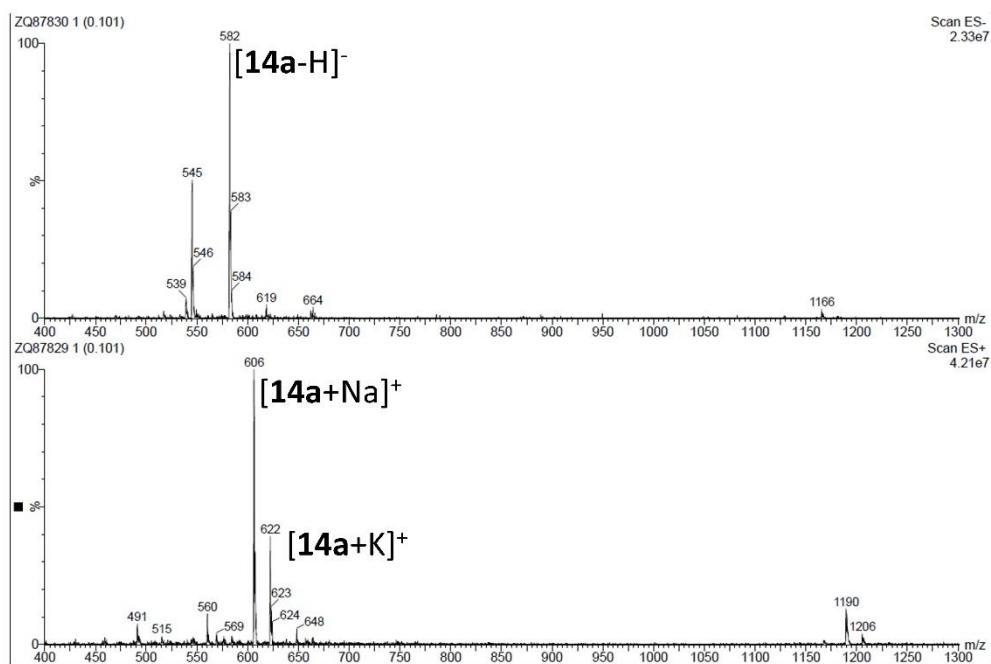

**Figure S82** ESI-MS spectrum of compound **14a**.

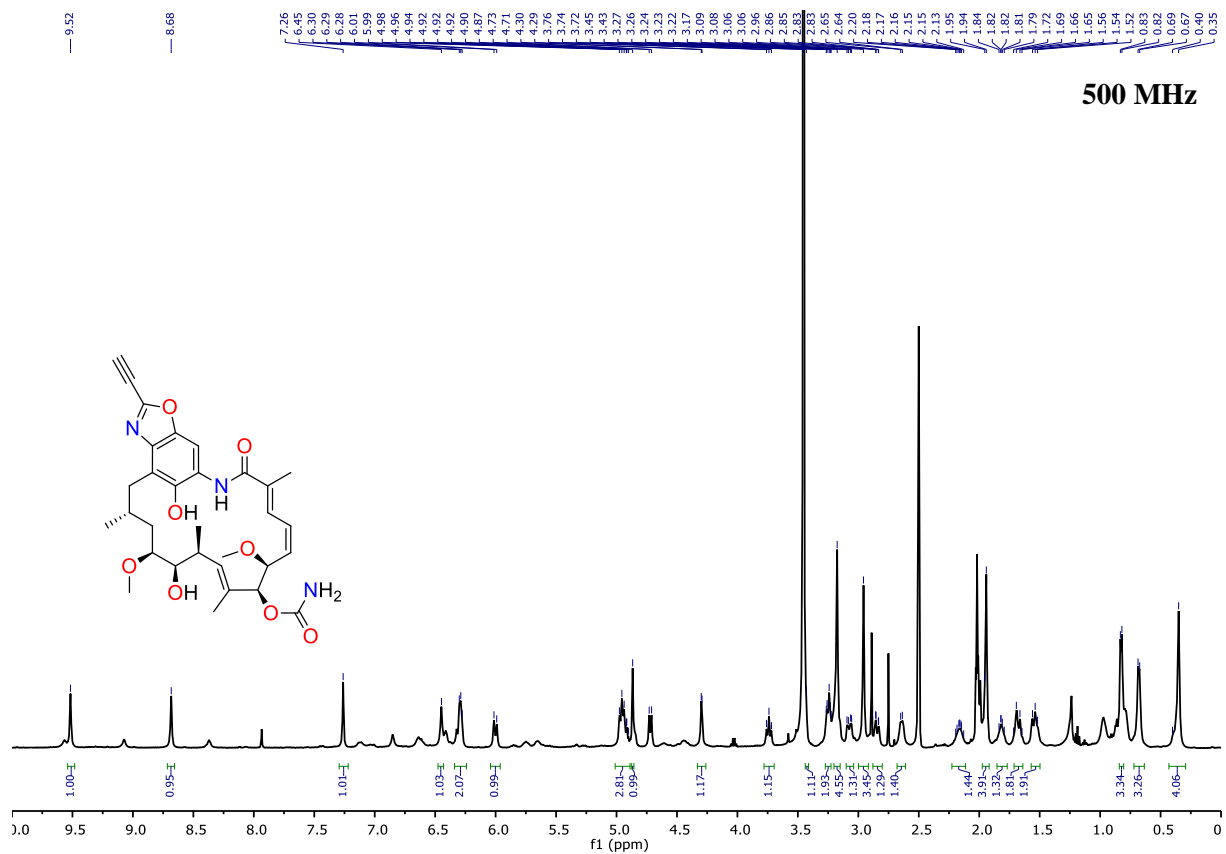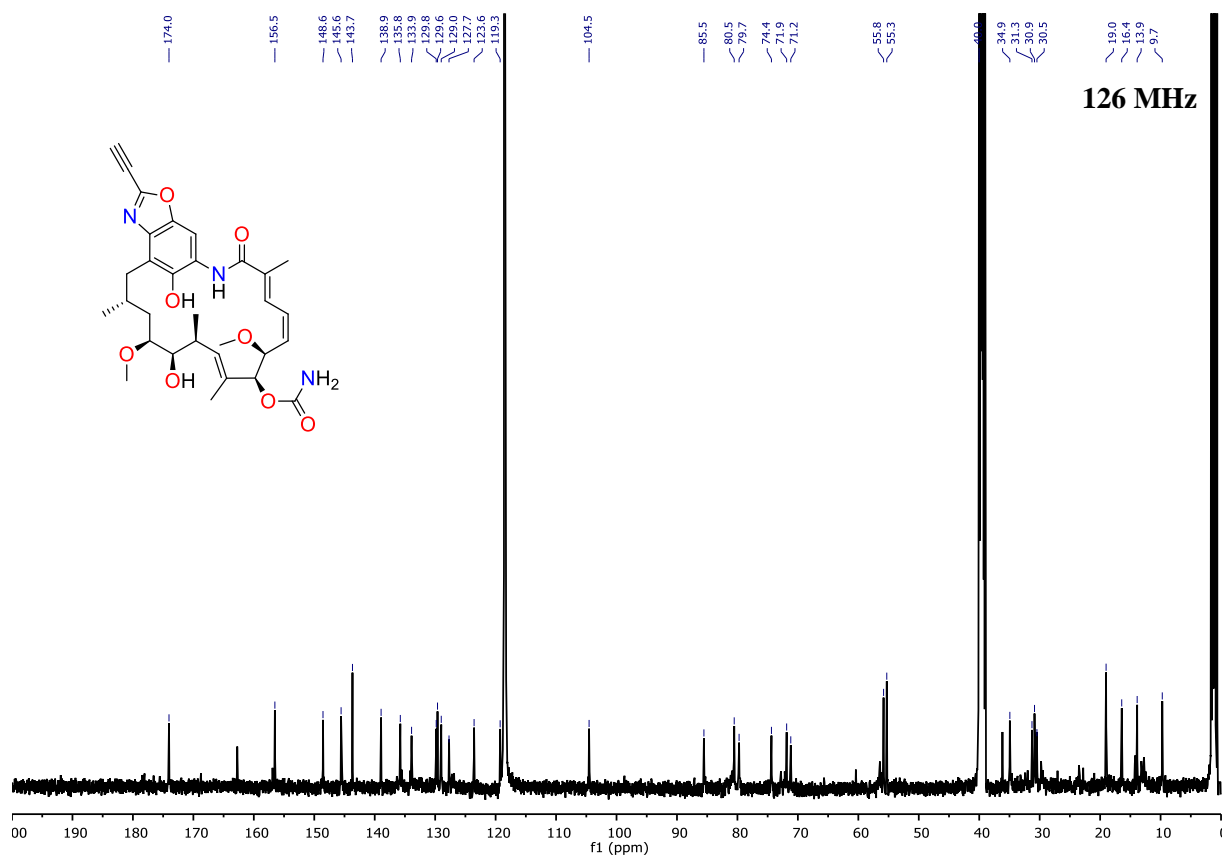

Figure S83  $^1\text{H}$  and  $^{13}\text{C}\{^1\text{H}\}$  spectra of compound 15a in  $\text{DMSO-}d_6 + \text{ACN-}d_3$ .



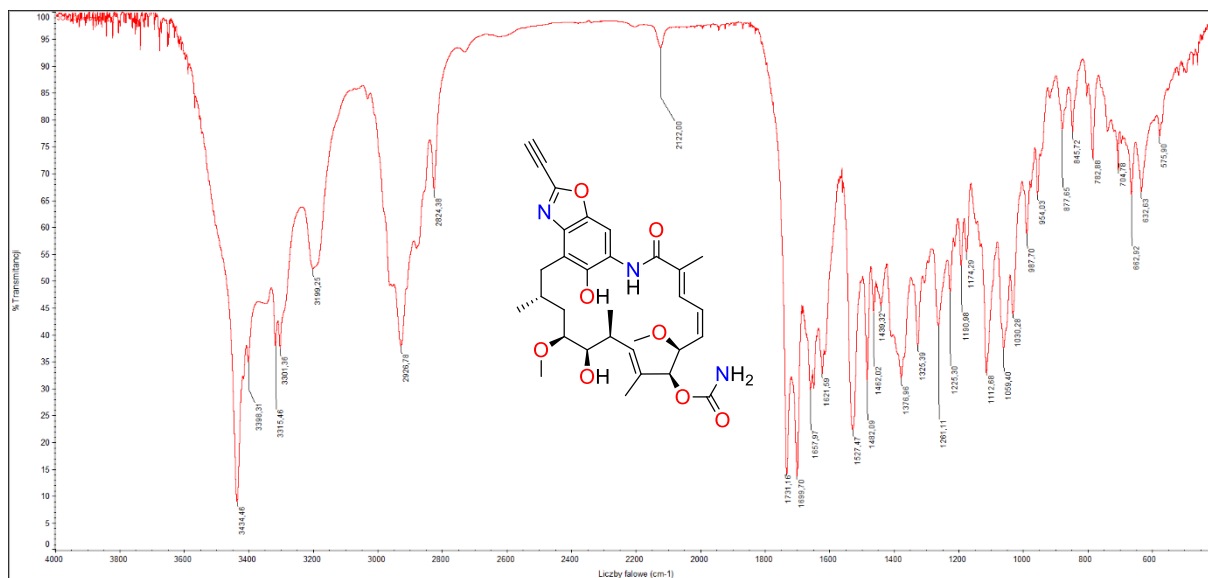

Figure S84 FT-IR spectrum of compound **15a** (in KBr).

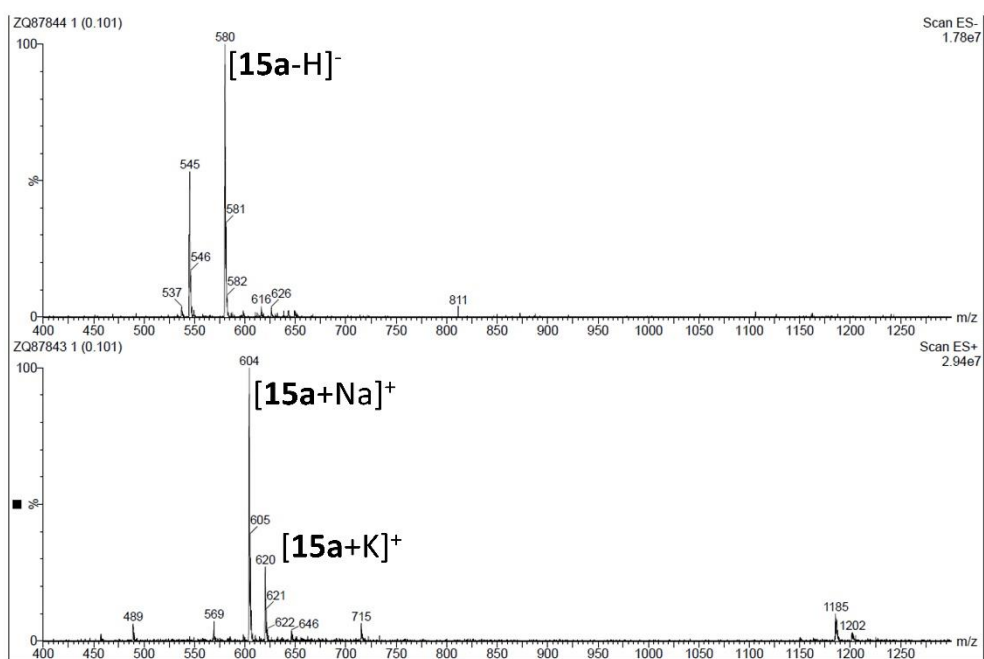

Figure S85 ESI-MS spectrum of compound **15a**.

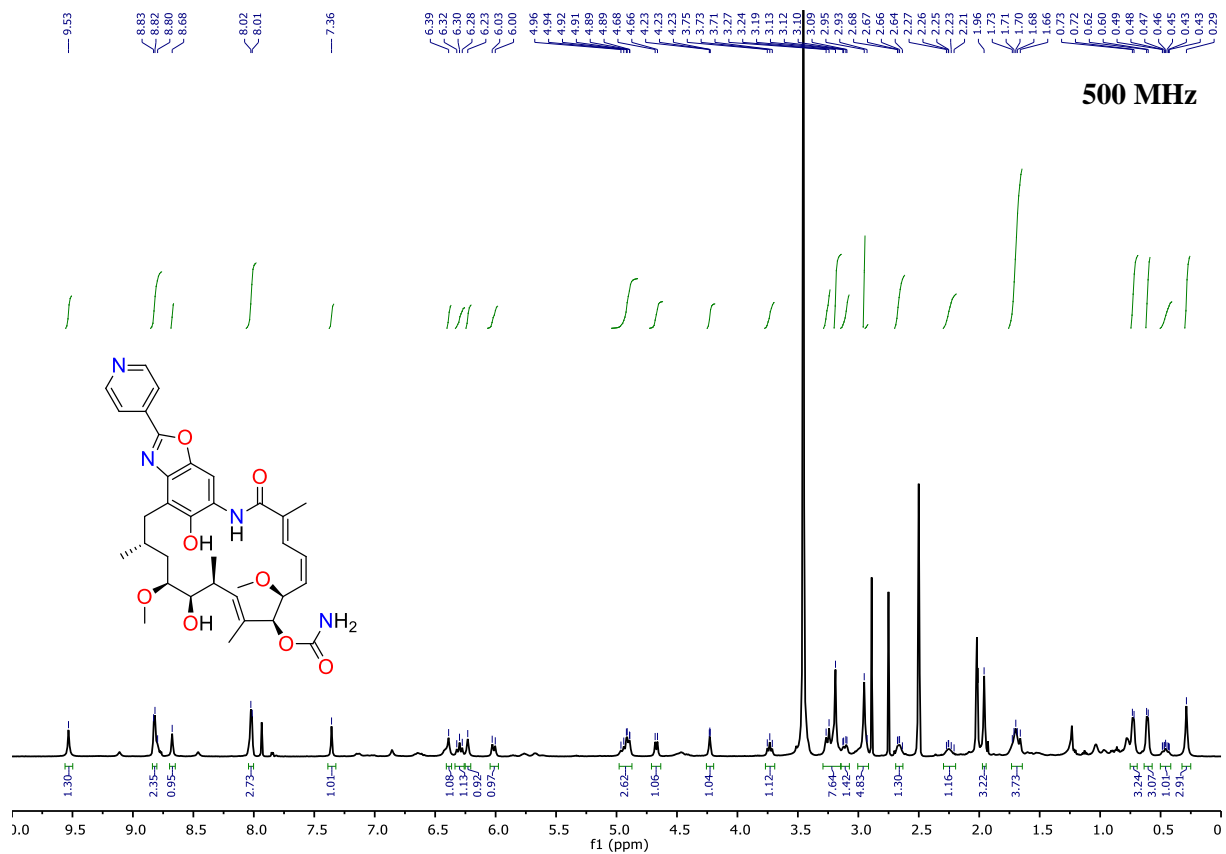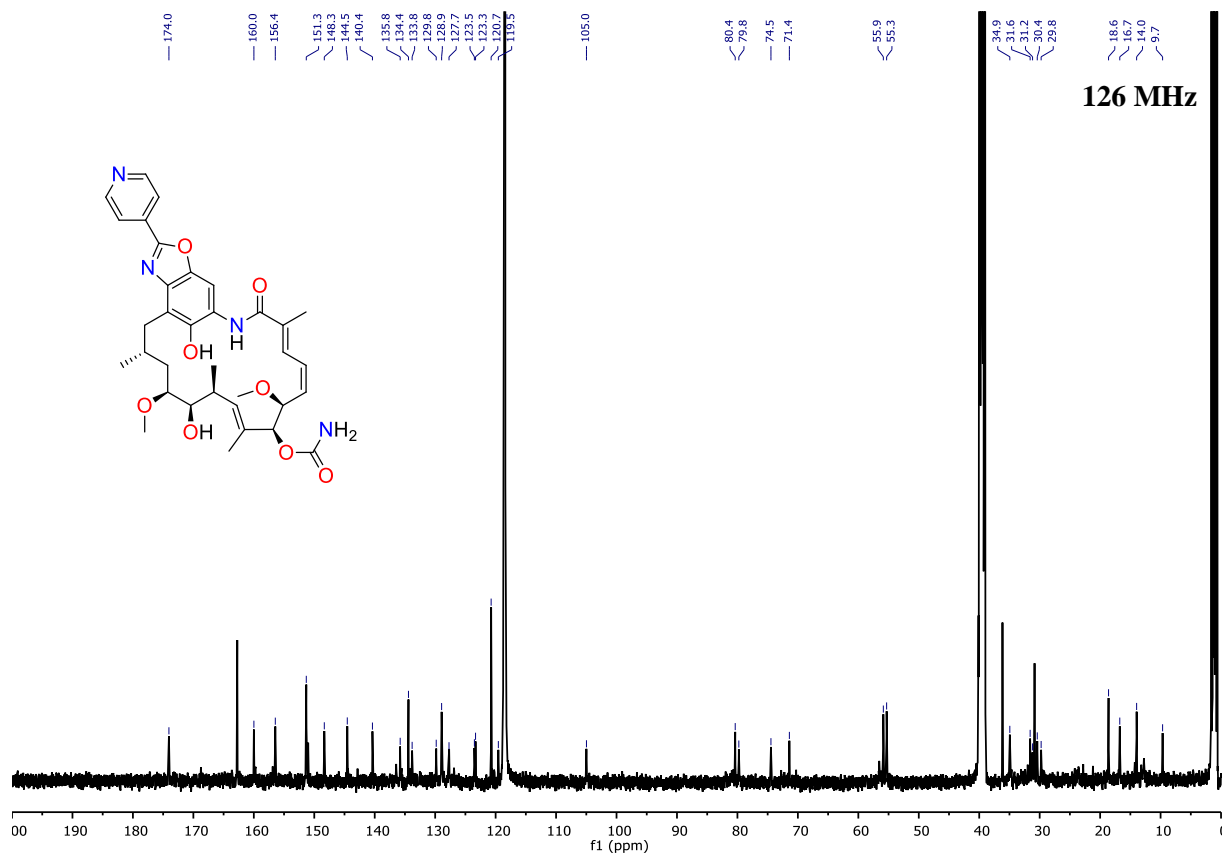

**Figure S86**  $^1\text{H}$  and  $^{13}\text{C}\{^1\text{H}\}$  spectra of compound **16a** in  $\text{DMSO-}d_6 + \text{ACN-}d_3$ .

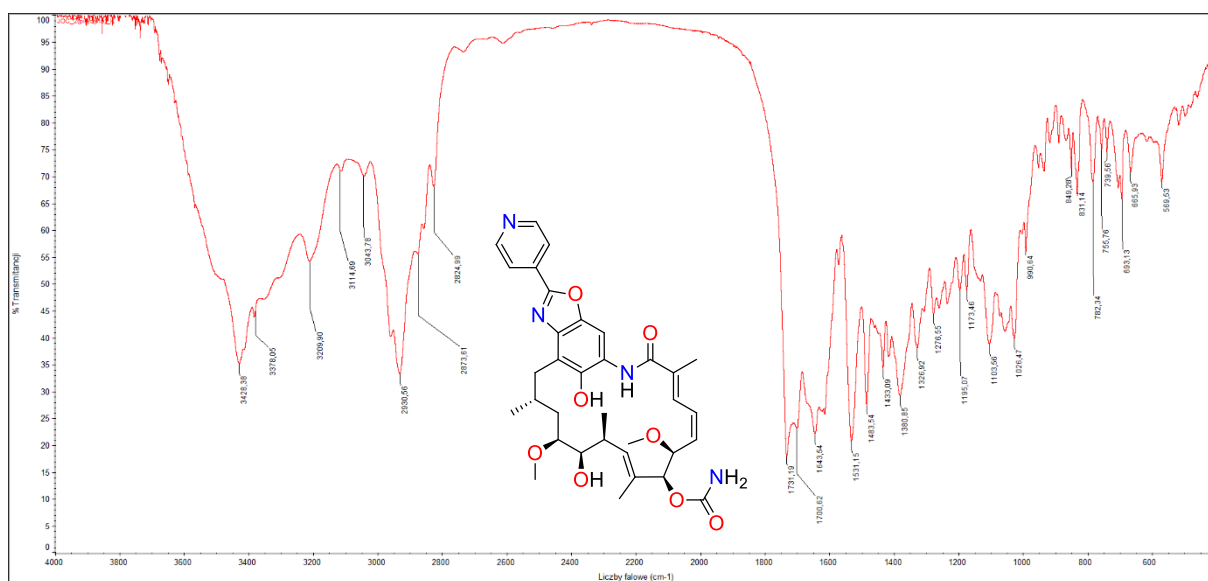

Figure S87 FT-IR spectrum of compound **16a** (in KBr).

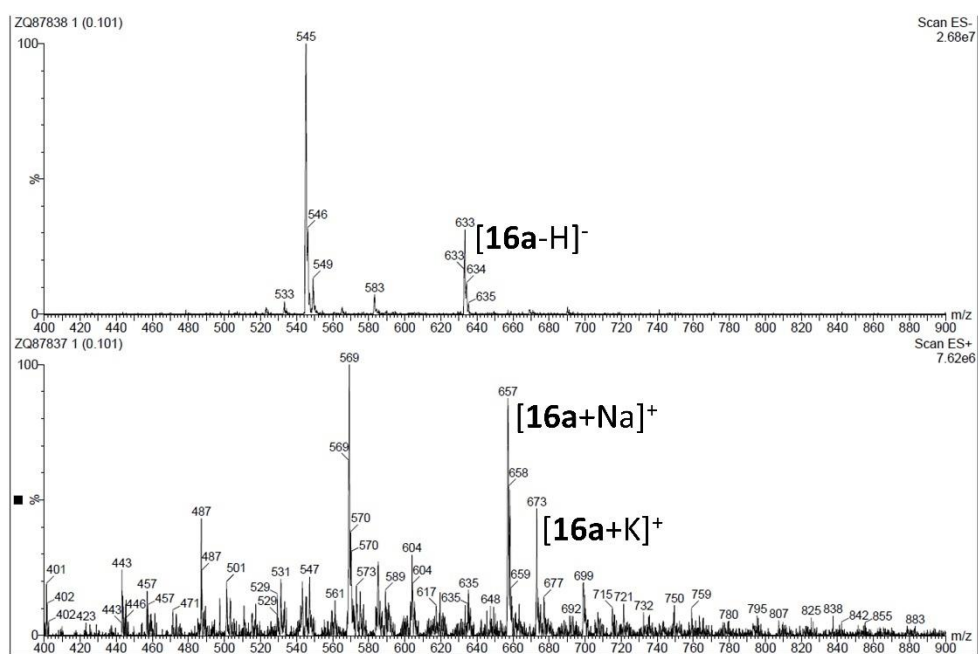

Figure S88 ESI-MS spectrum of compound **16a**.

## References:

- (1) Rigaku Oxford Diffraction, 2020.
- (2) Sheldrick, G. M. SHELXT – Integrated Space-Group and Crystal-Structure Determination. *Acta Cryst A* **2015**, *71* (1), 3–8. <https://doi.org/10.1107/S2053273314026370>.
- (3) Sheldrick, G. M. Crystal Structure Refinement with SHELXL. *Acta Crystallogr C Struct Chem* **2015**, *71* (1), 3–8. <https://doi.org/10.1107/S2053229614024218>.
- (4) Dolomanov, O. V.; Bourhis, L. J.; Gildea, R. J.; Howard, J. A. K.; Puschmann, H. OLEX2 : A Complete Structure Solution, Refinement and Analysis Program. *J Appl Crystallogr* **2009**, *42* (2), 339–341. <https://doi.org/10.1107/S0021889808042726>.
- (5) SwissADME [Http://www.swissadme.ch/index.php](http://www.swissadme.ch/index.php).
- (6) Daina, A.; Michielin, O.; Zoete, V. ILOGP: A Simple, Robust, and Efficient Description of n-Octanol/Water Partition Coefficient for Drug Design Using the GB/SA Approach. *J. Chem. Inf. Model.* **2014**, *54* (12), 3284–3301. <https://doi.org/10.1021/ci500467k>.
- (7) Skrzypczak, N.; Pyta, K.; Ruszkowski, P.; Gdaniec, M.; Bartl, F.; Przybylski, P. Synthesis, Structure and Anticancer Activity of New Geldanamycin Amine Analogs Containing C(17)- or C(20)- Flexible and Rigid Arms as Well as Closed or Open Ansa-Bridges. *European Journal of Medicinal Chemistry* **2020**, *202*, 112624. <https://doi.org/10.1016/j.ejmech.2020.112624>.
